# Supplementary material
Source: PubMed Central journal article supplement (PMC7173349)

| <b>Content</b>                                                                         | <b>Page number</b> |
|----------------------------------------------------------------------------------------|--------------------|
| General                                                                                | S2                 |
| Preparation of substrates                                                              | S2                 |
| Gold-catalyzed intermolecular ynamide isomerization and D-A reactions with dienophiles | S13                |
| Gold catalyzed intramolecular ynamide isomerization and D-A reactions                  | S24                |
| References                                                                             | S27                |
| NMR spectra                                                                            | S28                |

**General.** Ethyl acetate (ACS grade), hexanes (ACS grade) and diethyl ether (ACS grade) were purchased from Fisher Scientific and used without further purification. Anhydrous dichloromethane (HPLC grade), 1,2-dichloroethane (HPLC grade) were purified by distillation over calcium hydride. Toluene was distilled over sodium/benzophenone. Commercially available reagents were used without further purification. Reactions were monitored by thin-layer chromatography (TLC) using Silicycle precoated silica gel plates. Flash column chromatography was performed over Silicycle silica gel (230-400 mesh).  $^1\text{H}$  NMR and  $^{13}\text{C}$  NMR spectra were recorded on Varian 400 MHz, 500 MHz and 600 MHz spectrometers using residue solvent peaks as internal standards ( $\text{CHCl}_3$ ,  $^1\text{H}$ : 7.26 ppm;  $^{13}\text{C}$ : 77.16 ppm). Infrared spectra were recorded with a Perkin Elmer FT-IR spectrum 2000 spectrometer and are reported in reciprocal centimeter ( $\text{cm}^{-1}$ ). Mass spectra were recorded with Xevo G2-XS QTOF Quadrupole Time-of-Flight Mass Spectrometry using electron spray ionization.

### Preparation of substrates

#### 1-(Pyrrolidin-1-yl)hept-2-yn-1-one (**1a**)

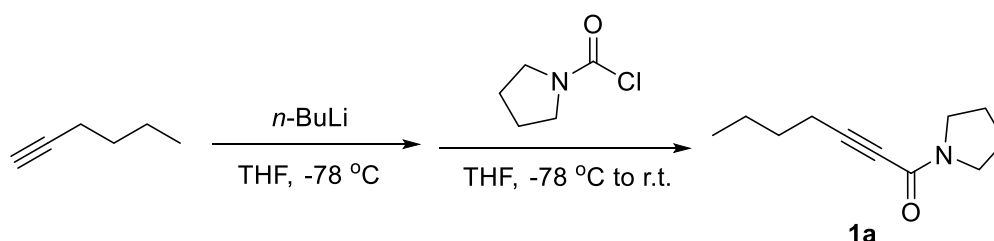

To a stirred solution of 1-hexyne (6 mmol) and THF (15 mL) was added *n*-BuLi (2.4 mL, 6 mmol, 2.5 M in hexane) at -78 °C. After 20 min, the solution was slowly cannulated into pyrrolidine-1-carbonyl chloride (0.682g, 6 mmol)<sup>1</sup> in THF (15 mL) at -78°C. Then, the solution was allowed to warm up and stirred for 2 hours at rt. After that, the mixture was quenched with sat. aq.  $\text{NH}_4\text{Cl}$  (20 mL) and extracted with EtOAc (20 mL). The organic phase was dried (with  $\text{MgSO}_4$ ), concentrated and purified by chromatography to give **1a** in 90% yield (0.97 g).  $^1\text{H}$  NMR (400 MHz, Chloroform-*d*)  $\delta$  3.64 – 3.52 (m, 2H), 3.42 (t,  $J$  = 6.6 Hz, 2H), 2.31 (t,  $J$  = 7.0 Hz, 2H), 1.88 (dq,  $J$  = 6.4, 3.8, 2.8 Hz, 4H), 1.57 – 1.46 (m, 2H), 1.40 (ddd,  $J$  = 9.9, 7.7, 6.0 Hz, 2H), 0.88 (t,

$J = 7.3$  Hz, 3H).  $^{13}\text{C}$  NMR (101 MHz,  $\text{CDCl}_3$ )  $\delta$  153.00, 91.59, 75.22, 48.15, 45.19, 29.95, 25.42, 24.79, 21.99, 18.55, 13.55. IR (neat): 2957, 2874, 1624, 1415, 1339, 1224, 831, 734. MS-ESI ( $m/z$ ):  $[\text{M}+\text{H}]^+$  calcd. for  $[\text{C}_{11}\text{H}_{18}\text{NO}]^+$ , 180.1383; found 180.1388.

### *N,N*-Dimethylhept-2-ynamide (**1b**)

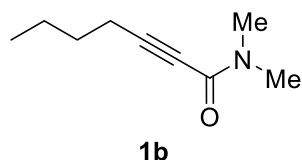

Compound **1b** was prepared from 1-hexyne (5 mmol) and dimethylcarbamic chloride<sup>1</sup> (5 mmol) according to the preparative procedure for **1a** in 85% yield (0.65 g).  $^1\text{H}$  NMR (400 MHz, Chloroform-*d*)  $\delta$  3.17 (s, 3H), 2.94 (s, 3H), 2.34 (t,  $J = 7.1$  Hz, 2H), 1.61 – 1.50 (m, 2H), 1.47 – 1.35 (m, 2H), 0.90 (t,  $J = 7.3$  Hz, 3H).  $^{13}\text{C}$  NMR (101 MHz,  $\text{CDCl}_3$ )  $\delta$  154.92, 93.19, 74.13, 38.43, 34.11, 29.95, 22.09, 18.70, 13.60. IR (neat): 2961, 2935, 1643, 1396, 1269, 1189, 735. MS-ESI ( $m/z$ ):  $[\text{M}+\text{Na}]^+$  calcd. for  $[\text{C}_9\text{H}_{15}\text{NONa}]^+$ , 176.1046; found 176.1058.

### *N,N*-Dibenzylhept-2-ynamide (**1c**)

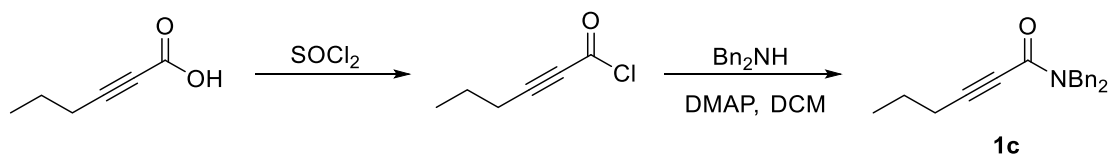

A solution of 2-hexynoic acid (2.0 mmol) in  $\text{SOCl}_2$  (2 mL) was stirred at 60 °C for 2 h. The mixture was cooled down to rt, and vapor away  $\text{SOCl}_2$  to give the crude 2-hexynoic chloride, which was directly used in next step. To the solution of 2-hexynoic chloride in DCM (4 mL), dibenzylamine (3.0 mmol, 1.5 equiv.) was slowly added at 0 °C. Then, the solution was allowed to warm up and stirred at rt for 2 hours. After that, the mixture was quenched with sat. aq.  $\text{NH}_4\text{Cl}$  (10 mL), diluted with EtOAc (10 mL). The organic phase was dried (with  $\text{MgSO}_4$ ), concentrated and purified by chromatography to give **1c** (220 mg, 39% yield for 2 steps).  $^1\text{H}$  NMR (400 MHz, Chloroform-*d*)  $\delta$  7.45 – 7.14 (m, 5H), 4.67 (s, 1H), 4.50 (s, 1H), 2.34 (t,  $J = 7.0$  Hz, 1H), 1.58 (q,  $J = 7.2$  Hz, 1H),

0.96 (t,  $J = 7.4$  Hz, 1H).  $^{13}\text{C}$  NMR (101 MHz,  $\text{CDCl}_3$ )  $\delta$  155.31, 136.54, 136.39, 128.94, 128.78, 128.58, 127.99, 127.81, 127.70, 93.90, 74.34, 51.45, 46.29, 21.44, 21.11, 13.67. IR (neat): 3009, 2182, 1622, 1493, 1419, 1235, 693. MS-ESI ( $m/z$ ):  $[\text{M}+\text{H}]^+$  calcd. for  $[\text{C}_{20}\text{H}_{22}\text{NO}]^+$ , 292.1696; found 292.1704.

### 1-(Piperidin-1-yl)hept-2-yn-1-one (1d)

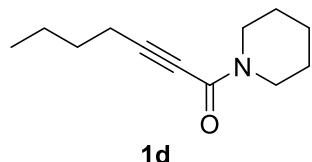

Compound **1d** was prepared from 1-hexyne (5 mmol) and piperidine-1-carbonyl chloride<sup>1</sup> (5 mmol) according to the procedure for **1a** in 47% yield (0.45 g).  $^1\text{H}$  NMR (500 MHz, Chloroform- $d$ )  $\delta$  3.71 – 3.64 (m, 2H), 3.60 – 3.52 (m, 2H), 2.36 (t,  $J = 7.1$  Hz, 2H), 1.70 – 1.51 (m, 9H), 1.48 – 1.37 (m, 2H), 0.92 (t,  $J = 7.3$  Hz, 3H).  $^{13}\text{C}$  NMR (101 MHz,  $\text{CDCl}_3$ )  $\delta$  153.20, 93.21, 73.91, 48.16, 42.26, 29.95, 26.46, 25.44, 24.63, 22.09, 18.75, 13.60. IR (neat): 2939, 2859, 1635, 1466, 1368, 1235, 853, 732. MS-ESI ( $m/z$ ):  $[\text{M}+\text{Na}]^+$  calcd. for  $[\text{C}_{12}\text{H}_{19}\text{NONa}]^+$ , 216.1359; found 216.1374.

### 1-Morpholinohept-2-yn-1-one (1e)

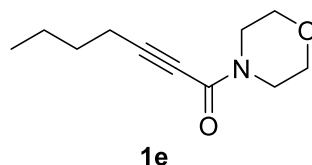

Compound **1e** was prepared from 1-hexyne (5 mmol) and morpholine-4-carbonyl chloride<sup>1</sup> (5 mmol) according to the procedure for **1a** in 52% yield (0.50 g).  $^1\text{H}$  NMR (500 MHz, Chloroform- $d$ )  $\delta$  3.85 – 3.50 (m, 8H), 2.36 (t,  $J = 7.1$  Hz, 2H), 1.56 (q,  $J = 7.0$  Hz, 2H), 1.49 – 1.36 (m, 2H), 0.92 (t,  $J = 7.3$  Hz, 3H).  $^{13}\text{C}$  NMR (101 MHz,  $\text{CDCl}_3$ )  $\delta$  153.36, 94.23, 73.29, 66.89, 66.49, 47.23, 41.83, 29.82, 22.05, 18.66, 13.53. IR (neat): 2960, 2860, 1635, 1428, 1247, 830, 731. MS-ESI ( $m/z$ ):  $[\text{M}+\text{H}]^+$  calcd. for  $[\text{C}_{11}\text{H}_{18}\text{NO}_2]^+$ , 196.1332; found 196.1336.

### ***N*-Methyl-*N*-phenylhex-2-ynamide (**1f**)**

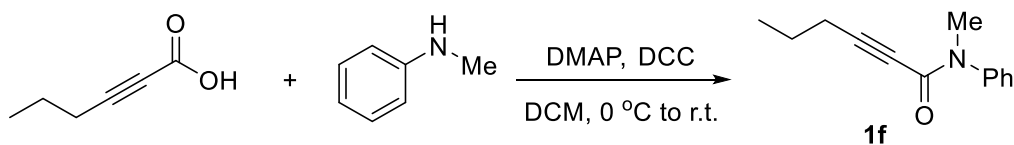

To a solution of 2-hexynoic acid (7.5 mmol, 1 equiv.) and *N*-methyl aniline (8.0 mmol) in 3 mL of DCM (10 mL) at 0 °C, DCC (1.1 equiv.) and DMAP (0.1 equiv.) were added slowly. The reaction mixture was warmed up and stirred at r.t. for 12 h. After that, the mixture was filtrated, washed with DCM. The filtrate was evaporated and the residue was purified by flash column chromatography to give corresponding ynamide **1f** (1.04 g, 69% yield). For the major rotamer, <sup>1</sup>H NMR (400 MHz, Chloroform-*d*) δ 7.43 – 7.36 (m, 2H), 7.35 – 7.24 (m, 3H), 3.32 (s, 3H), 2.07 (t, *J* = 6.9 Hz, 2H), 1.28 (h, *J* = 7.2 Hz, 2H), 0.70 (t, *J* = 7.4 Hz, 3H). <sup>13</sup>C NMR (101 MHz, CDCl<sub>3</sub>) δ 154.52, 143.49, 129.14, 127.77, 127.36, 93.98, 75.11, 36.41, 21.01, 20.79, 13.22. IR (neat): 3067, 2966, 1643, 1596, 1495, 1369, 1175, 1095, 770. MS-ESI (*m/z*): [M+Na]<sup>+</sup> calcd. for [C<sub>9</sub>H<sub>15</sub>NONa]<sup>+</sup>, 176.1046; found 176.1058.

### ***N,N*-Diphenylhept-2-ynamide (**1g**)**

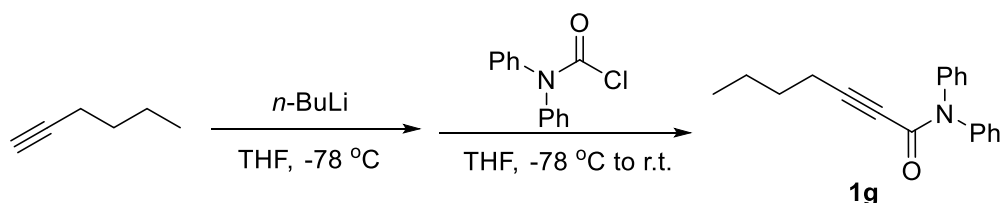

To a stirred solution of 1-hexyne (4 mmol) and THF (10 mL) was added *n*-BuLi (1.6 mL, 4.00 mmol, 2.5 M in hexane) at -78 °C. After 20 min, the solution was slowly cannulated into ClC(O)NPh<sub>2</sub> (924 mg, 4 mmol)<sup>1</sup> in THF (10 mL) at -78 °C. Then, the solution was allowed to warm up and stirred for 2 hours at rt. After that, the mixture was quenched with sat. aq. NH<sub>4</sub>Cl (20 mL), diluted with EtOAc (20 mL). The organic phase was dried (with MgSO<sub>4</sub>), concentrated and purified by chromatography to give **1g** (460 mg, 42% yield). <sup>1</sup>H NMR (500 MHz, Chloroform-*d*) δ 7.32 – 7.19 (m, 10H), 2.14 (t, *J* = 6.9 Hz, 2H), 1.24 (dq, *J* = 8.6, 6.8, 0.6 Hz, 2H), 1.14 – 1.02 (m, 2H), 0.77 (t, *J* = 7.3 Hz, 3H). <sup>13</sup>C NMR (101 MHz, CDCl<sub>3</sub>) δ 153.91, 142.61, 141.47, 129.09,

129.02, 127.93, 126.42, 126.02, 95.74, 75.72, 29.43, 21.61, 18.64, 13.55. IR (neat): 2958, 2932, 1648, 1491, 1340, 1029, 757. MS-ESI ( $m/z$ ):  $[M+H]^+$  calcd. for  $[C_{20}H_{22}NO]^+$ , 292.1696; found 292.1704.

### N,N-Dibenzyl-6-((triisopropylsilyloxy)hex-2-ynamide) (**1h**)

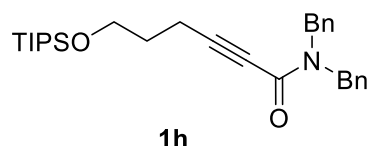

Compound **1h** was prepared from triisopropyl(pent-4-yn-1-yloxy)silane (5.77 mmol) and dibenzylcarbamic chloride (5.77 mmol) according to the procedure for **1b** in 86% yield (2.36 g).  $^1H$  NMR (500 MHz, Chloroform-*d*)  $\delta$  7.43 – 7.06 (m, 10H), 4.67 (s, 2H), 4.50 (s, 2H), 3.72 (t,  $J = 5.9$  Hz, 2H), 2.50 (t,  $J = 7.1$  Hz, 2H), 1.84 – 1.73 (m, 2H), 1.14 – 0.96 (m, 21H).  $^{13}C$  NMR (126 MHz,  $CDCl_3$ )  $\delta$  155.21, 136.49, 136.32, 128.91, 128.74, 128.52, 127.96, 127.75, 127.66, 93.80, 74.16, 61.68, 51.43, 46.23, 31.19, 18.08, 15.65, 12.02. IR (neat): 2943, 2892, 2866, 1635, 1421, 1233, 1073, 882, 732. MS-ESI ( $m/z$ ):  $[M+H]^+$  calcd. for  $[C_{29}H_{42}NO_2Si]^+$ , 464.2979; found 464.2984..

### 6-(Dibenzylamino)-6-oxohex-4-yn-1-yl acetate (**1i**)

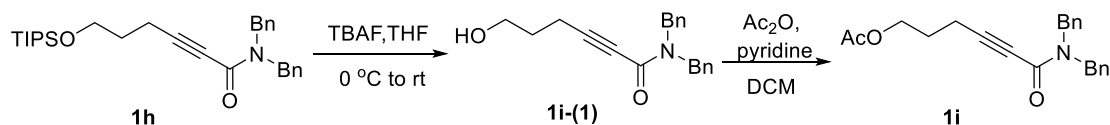

Compound **1i** was prepared from **1h**. To the solution of **1h** (1.5 g, 3.23 mmol) in THF (20 mL) was added TBAF (1.1 equiv.) at 0 °C and then stirred at rt for 1h. After that, water (20 mL) was added and extracted with ethyl acetate (20 mL). The organic phase was washed with brine and dried with  $MgSO_4$  before concentrating. The crude product was purified by chromatography to give the alcohol **1i-(1)** (0.92 g, 93%). To the solution of the alcohol **1i-(1)** (0.6 mmol) in DCM (10 mL) was added  $Ac_2O$  (0.72 mmol), then pyridine (1.5 equiv.) and DMAP (0.1 equiv.). The mixture was stirred at r.t. for 2h before adding brine (10 mL). The organic phase was dried with  $MgSO_4$  and condensed. Further purification by chromatography gave the product **1i**

(199 mg, 95%). <sup>1</sup>H NMR (400 MHz, Chloroform-*d*) δ 7.43 – 7.15 (m, 10H), 4.66 (s, 2H), 4.50 (s, 2H), 4.09 (t, *J* = 6.2 Hz, 2H), 2.46 (t, *J* = 7.1 Hz, 2H), 2.01 (s, 3H), 1.93 – 1.78 (m, 2H). <sup>13</sup>C NMR (101 MHz, CDCl<sub>3</sub>) δ 170.80, 154.84, 136.23, 136.08, 128.80, 128.62, 128.39, 127.86, 127.57, 127.51, 92.01, 74.57, 62.70, 51.28, 46.25, 26.91, 20.80, 15.86. IR (neat): 2928, 2239, 1736, 1623, 1420, 1230, 698. MS-ESI (*m/z*): [M+H]<sup>+</sup> calcd. for [C<sub>22</sub>H<sub>24</sub>NO<sub>3</sub>]<sup>+</sup>, 350.1751; found 350.1747.

***tert*-Butyl (6-(dibenzylamino)-6-oxohex-4-yn-1-yl)(tosyl)carbamate (**1j**)**

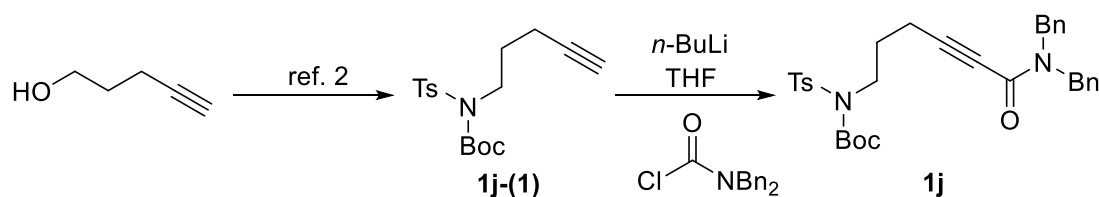

Compound **1j** was prepared from **1j-(1)**<sup>2</sup> (1 mmol) and dibenzylcarbamic chloride<sup>1</sup> (1 mmol) according to the procedure for **1b** in 56% yield (309 mg). <sup>1</sup>H NMR (500 MHz, Chloroform-*d*) δ 7.76 – 7.67 (m, 2H), 7.44 – 7.21 (m, 12H), 4.76 (s, 2H), 4.54 (s, 2H), 3.98 – 3.82 (m, 2H), 2.51 (t, *J* = 7.2 Hz, 2H), 2.45 (s, 3H), 2.14 – 1.99 (m, 2H), 1.34 (s, 9H). <sup>13</sup>C NMR (126 MHz, CDCl<sub>3</sub>) δ 154.91, 150.74, 144.22, 137.11, 136.29, 136.23, 129.26, 128.78, 128.62, 128.37, 127.79, 127.72, 127.68, 127.54, 92.13, 84.40, 74.58, 51.35, 46.20, 46.13, 28.29, 27.82, 21.58, 16.60. IR (neat): 2981, 2933, 1727, 1628, 1495, 1286, 988, 814, 735. MS-ESI (*m/z*): [M+Na]<sup>+</sup> calcd. for [C<sub>32</sub>H<sub>36</sub>N<sub>2</sub>O<sub>5</sub>SNa]<sup>+</sup>, 583.2237; found 583.2226.

***N,N*-Dibenzyl-5-((*tert*-butyldimethylsilyloxy)pent-2-ynamide (**1k**)**

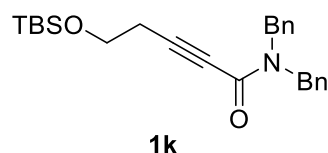

Compound **1k** was prepared from (but-3-yn-1-yloxy)(*tert*-butyl)dimethylsilane (3 mmol) and dibenzylcarbamic chloride<sup>1</sup> (3 mmol) according to the procedure for **1b** in 60% yield (0.55 g). <sup>1</sup>H NMR (500 MHz, Chloroform-*d*) δ 7.40 – 7.19 (m, 10H), 4.69 (s, 2H), 4.51 (s, 2H), 3.77 (t, *J* = 6.9 Hz, 2H), 2.59 (t, *J* = 6.8 Hz, 2H), 0.86 (s, 9H), 0.04

(s, 6H).  $^{13}\text{C}$  NMR (126 MHz,  $\text{CDCl}_3$ )  $\delta$  155.03, 136.41, 136.25, 128.90, 128.75, 128.49, 127.97, 127.82, 127.67, 90.99, 74.98, 60.96, 51.44, 46.20, 25.91, 23.56, 18.33, -5.29. IR (neat): 2954, 2929, 2856, 1633, 1423, 1251, 1075, 837, 753. MS-ESI ( $m/z$ ):  $[\text{M}+\text{H}]^+$  calcd. for  $[\text{C}_{25}\text{H}_{34}\text{NO}_2\text{S}]^+$ , 408.2353; found 408.2357.

### *N,N*-Dibenzyl-4-cyclohexylbut-2-ynamide (**1l**)

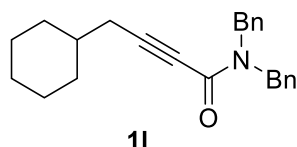

Compound **1l** was prepared from prop-2-yn-1-ylcyclohexane (3 mmol) and dibenzylcarbamic chloride<sup>1</sup> (3 mmol) according to the procedure for **1b** in 63% yield (1.0 g).  $^1\text{H}$  NMR (500 MHz, Chloroform-*d*)  $\delta$  7.43 – 7.21 (m, 10H), 4.70 (s, 2H), 4.53 (s, 2H), 2.27 (d,  $J = 6.6$  Hz, 2H), 1.80 – 1.46 (m, 6H), 1.27 – 0.91 (m, 5H).  $^{13}\text{C}$  NMR (126 MHz, Chloroform-*d*)  $\delta$  155.33, 136.54, 136.36, 128.86, 128.72, 128.54, 127.88, 127.64, 127.62, 92.98, 75.07, 51.37, 46.37, 36.89, 32.75, 26.83, 26.07, 26.05. IR (neat): 2923, 2851, 2238, 1712, 1624, 1420, 1213, 729, 697. MS-ESI ( $m/z$ ):  $[\text{M}+\text{Na}]^+$  calcd. for  $[\text{C}_{24}\text{H}_{27}\text{NNaO}]^+$ , 368.1985; found 368.1951.

### *N,N*-Dibenzylbut-2-ynamide (**1m**)

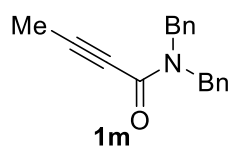

Crude 2-butynoic chloride was prepared from 2-butynoic acid (2.0 mmol) in  $\text{SOCl}_2$  (2 mL) and directly used with dibenzylamine (3.0 mmol, 1.5 equiv.) according to the procedure for **1c** in 50% yield (0.26 g).  $^1\text{H}$  NMR (500 MHz, Chloroform-*d*)  $\delta$  7.45 – 7.16 (m, 10H), 4.68 (s, 2H), 4.51 (s, 2H), 2.02 (s, 3H).  $^{13}\text{C}$  NMR (126 MHz, Chloroform-*d*)  $\delta$  155.20, 136.42, 136.30, 128.92, 128.75, 128.49, 127.98, 127.76, 127.67, 89.86, 73.48, 51.37, 46.20, 4.23. IR (neat): 2922, 2242, 1615, 1419, 1225, 973, 732, 696. MS-ESI ( $m/z$ ):  $[\text{M}+\text{Na}]^+$  calcd. for  $[\text{C}_{18}\text{H}_{17}\text{NNaO}]^+$ , 286.1202; found 286.1195.



### N,N-dibenzyl-4-(4-methoxyphenyl)but-2-ynamide (1n)

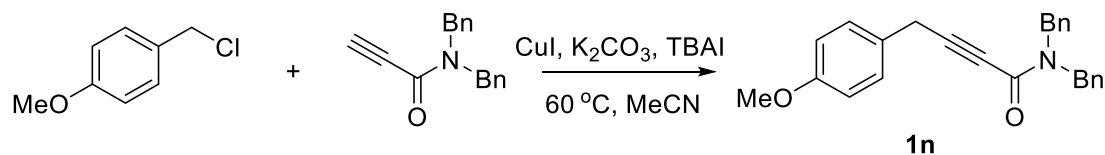

To a dried, Ar protected Schlenk flask were added sequentially CuI (190 mg, 1 mmol), K<sub>2</sub>CO<sub>3</sub> (138 mg, 1 mmol), TBAI (370 mg, 1 mmol). N,N-dibenzylpropiolamide (500 mg, 2 mmol) was dissolved in 5 mL degassed MeCN and injected. 1-(chloromethyl)-4-methoxybenzene (156.61 mg, 1 mmol) was injected last. The reaction was heated at 60 °C for 24 hrs, then washed with saturated NH<sub>4</sub>Cl solution. 280 mg **1n** was obtained with 76% Yield. <sup>1</sup>H NMR (500 MHz, Chloroform-d) δ 7.42 – 7.20 (m, 10H), 7.19 – 7.11 (m, 2H), 6.84 – 6.68 (m, 2H), 4.68 (s, 2H), 4.54 (s, 2H), 3.77 (s, 3H), 3.71 (s, 2H). <sup>13</sup>C NMR (126 MHz, CDCl<sub>3</sub>) δ 158.69, 155.07, 136.38, 136.22, 129.01, 128.90, 128.83, 128.74, 128.58, 128.52, 127.94, 127.69, 127.65, 127.36, 126.62, 114.19, 91.40, 75.69, 55.36, 51.39, 46.44, 24.61. IR (neat): 2836, 2239, 1624, 1450, 1421, 1245, 698. MS-ESI (m/z): [M+Na]<sup>+</sup> calcd. for [C<sub>25</sub>H<sub>23</sub>NNaO<sub>2</sub>]<sup>+</sup>, 392.1621; found 392.1624.

### N,N-dibenzyl-4-(thiophen-3-yl)but-2-ynamide (1o)

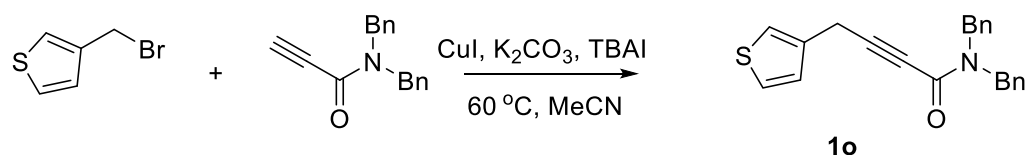

To a dried, Ar protected Schlenk flask were added sequentially CuI (190 mg, 1 mmol), K<sub>2</sub>CO<sub>3</sub> (138 mg, 1 mmol), TBAI (370 mg, 1 mmol). N,N-dibenzylpropiolamide (250mg, 1 mmol) was dissolved in 5 mL degassed MeCN and injected. 3-(bromomethyl)thiophene (212.5 mg, 1 mmol) was injected last. The reaction was heated at 60 °C for 24 hr, then washed with saturated NH<sub>4</sub>Cl solution. 100 mg **1o** was obtained with 29% yield and 89% purity along with some inseparable unknown impurities. <sup>1</sup>H NMR (600 MHz, Chloroform-d) δ 7.43 – 7.14 (m, 11H), 7.05 (dq, J = 2.5, 1.2 Hz, 1H), 6.94 (dd, J = 5.0, 1.3 Hz, 1H), 4.69 (s, 2H), 4.54 (s, 2H), 3.75 (s, 2H). <sup>13</sup>C NMR (151 MHz, CDCl<sub>3</sub>) δ 154.88, 136.23, 136.07, 134.38, 128.86, 128.67, 128.43, 127.89,

127.63, 127.51, 127.36, 126.28, 90.49, 75.24, 51.28, 46.38, 20.49. IR: 3029, 2924, 2240, 1710, 1622, 1420, 1232, 697. MS-ESI ( $m/z$ ):  $[M+H]^+$  calcd. for  $[C_{22}H_{19}NNaOS]^+$ , 368.1080; found 368.1084.

### 6-(Dibenzylamino)-6-oxohex-4-yn-1-yl ethyl maleate (7a)

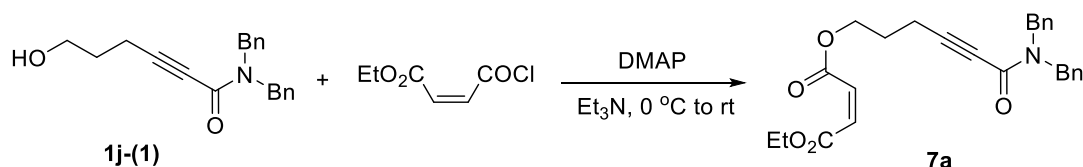

Ethyl (Z)-4-chloro-4-oxobut-2-enoate **7a** was prepared according to the procedure for (E)-4-chloro-4-oxobut-2-enoate.<sup>3</sup> At 0 °C, to the solution of **1j-(1)** (0.7 mmol) in DCM (10 mL) was added ethyl (Z)-4-chloro-4-oxobut-2-enoate (0.7 mmol), then Et<sub>3</sub>N (1.5 equiv.) and DMAP (0.1 equiv.) were added. The mixture was stirred at r.t. for 2 h before adding brine (10 mL). The organic phase was dried with MgSO<sub>4</sub> and condensed. Further purification by chromatograph gave the product **7a** (166 mg, 55%). <sup>1</sup>H NMR (500 MHz, Chloroform-*d*) δ 7.43 – 7.14 (m, 10H), 6.81 (s, 2H), 4.66 (s, 2H), 4.50 (s, 2H), 4.34 – 4.19 (m, 4H), 2.49 (t, *J* = 7.1 Hz, 2H), 2.00 – 1.89 (m, 2H), 1.31 (t, *J* = 7.2 Hz, 2H). <sup>13</sup>C NMR (126 MHz, CDCl<sub>3</sub>) δ 164.88, 164.80, 154.89, 136.32, 136.15, 134.12, 133.11, 128.93, 128.75, 128.51, 127.98, 127.70, 127.58, 91.70, 74.88, 63.59, 61.47, 51.40, 46.41, 26.91, 15.88, 14.19. IR (neat): 2982, 2938, 1721, 1631, 1496, 1423, 1260, 1030, 978, 733. MS-ESI ( $m/z$ ):  $[M+H]^+$  calcd. for  $[C_{26}H_{28}NO_5]^+$ , 434.1962; found 434.1948.

### Methyl (E)-3-(2-(N-methylbut-2-ynamido)phenyl)acrylate (7b)

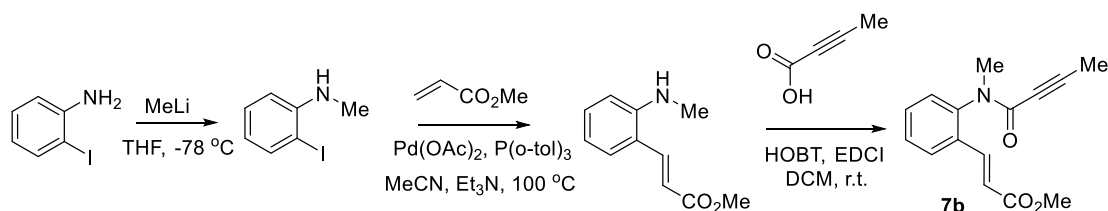

N-methyl-2-iodoaniline was prepared according to the procedure previously reported.<sup>4</sup> A mixture of N-methyl-2-iodoaniline (3.0g, 12.87 mmol) methylacrylate (1.33g,

15.44mmol), Pd(OAc)<sub>2</sub> (143.7 mg, 0.64 mmol), Et<sub>3</sub>N (2.135 ml, 15.44 mmol), and P(o-tol)<sub>3</sub> (292mg, 0.96 mmol) in anhydrous CH<sub>3</sub>CN (20 ml) was heated for 6 hrs in a tightly capped culture tube under Ar atmosphere. The mixture was portioned between Et<sub>2</sub>O and a 1:1 mixture of 3 N HCl and brine. The crude product was purified by flash column chromatography gave methyl (E)-3-(2-(dimethylamino) phenyl) acrylate (1.87g, 71%). 2-butynoic acid (168 mg, 2.0 mmol), EDCI (1.2 eq) and HOBT (0.1 eq) were added to a solution of methyl (E)-3-(2-(dimethylamino) phenyl) acrylate (1.0 eq) in DCM (0.25 M) at room temperature, The resulting solution was stirred at room temperature for 20 hours, quenched with NaHCO<sub>3</sub> (aq.) and extracted twice with DCM. The combined organic layers were washed with water and brine, dried over Na<sub>2</sub>SO<sub>4</sub>, concentrated in vacuo and purified by flash chromatography on silica gel to afford **7b** in 62% yield (320 mg). <sup>1</sup>H NMR (500 MHz, Chloroform-d)( Major rotamer ) δ 7.70 – 7.56 (m, 2H), 7.47 – 7.31 (m, 2H), 7.27 – 7.16 (m, 1H), 6.43 (d, J = 16.0, 1H), 3.79 (s, 3H), 3.23 (s, 3H), 1.65 (s, 3H). <sup>13</sup>C NMR (126 MHz, Chloroform-d) δ 166.86, 154.69, 142.53, 139.11, 132.81, 131.12, 129.53, 128.98, 127.46, 120.92, 90.54, 73.98, 51.99, 36.54, 3.93. IR (neat): 2998, 2225, 1702, 1624, 1364, 1270, 981, 775, 735, 594. [M+Na]<sup>+</sup> calcd. for [C<sub>15</sub>H<sub>15</sub>NNaO<sub>3</sub>]<sup>+</sup>, 280.0944; found 280.0953.

### Methyl (E)-3-(2-(N-methylhex-2-ynamido)phenyl)acrylate (**7c**)

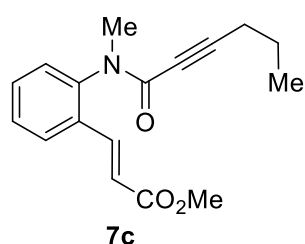

Compound **7c** was prepared according to the procedure **7b** by using 2-hexynoic acid (224 mg, 2 mmol) in the last step. Compound **7c** was afforded in 65% yield (372 mg). <sup>1</sup>H NMR (500 MHz, Chloroform-d) ( Major rotamer ) δ 7.71 – 7.56 (m, 2H), 7.46 – 7.31 (m, 2H), 7.27 – 7.15 (m, 1H), 6.42 (d, J = 16.0 Hz, 1H), 3.78 (s, 3H), 3.24 (s, 3H), 1.98 (t, J = 6.9 Hz, 2H), 1.16 (h, J = 7.2 Hz, 2H), 0.60 (t, J = 7.4 Hz, 3H). <sup>13</sup>C NMR (126 MHz, Chloroform-d) δ 166.81, 154.72, 142.67, 139.08, 132.90, 131.10, 129.55,

128.93, 127.37, 120.89, 94.55, 74.93, 51.95, 51.95, 36.42, 20.96, 20.68, 13.11. IR (neat): 2964, 2223, 1716, 1634, 1272, 1171, 1036, 763, 733, 589.  $[M+Na]^+$  calcd. for  $[C_{17}H_{19}NNaO_3]^+$ , 308.1257; found 308.1255.

**Methyl (E)-3-(2-(N-methyl-6-((triisopropylsilyl)oxy)hex-2-ynamido)phenyl)acrylate (7d)**

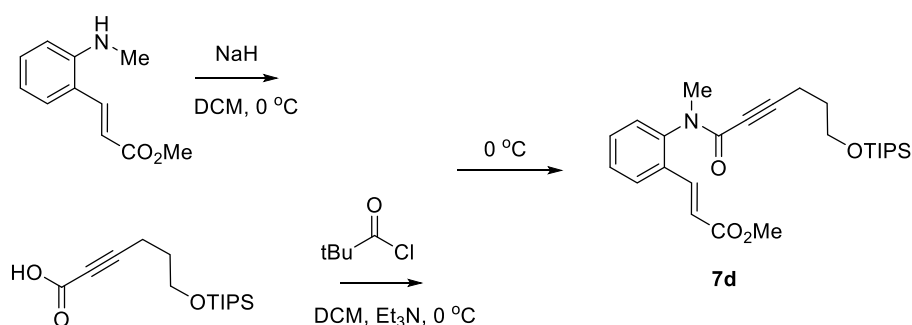

1.0 equiv. N-methyl-2-iodoaniline methylacrylate (235mg, 1.23 mmol) was dissolved in 6 ml DCM under Ar atmosphere, NaH 60% in oil (73.8mg, 1.84 mmol) was added at 0 °C, keep stirring at room temperature for another 45 minutes. 2.0 equiv. 6-((triisopropylsilyl)oxy) hex-2-ynoic acid (700 mg, 2.46 mmol) was dissolved in 6 ml DCM under Ar, Et<sub>3</sub>N (273 mg, 2.70 mmol) was added, then pivaloyl chloride (326 mg, 2.70 mmol) was added. Keep stirring for 20 minutes. Then deprotonated N-methyl-2-iodoaniline methylacrylate was transferred to the reaction via cannula at 0 °C. The reaction was stirred overnight. **7d** (350 mg, 62%) was obtained by flash chromatography. <sup>1</sup>H NMR (500 MHz, Chloroform-d) (Major rotamer) δ 7.72 – 7.57 (m, 2H), 7.48 – 7.35 (m, 2H), 7.26 (m, 1H), 6.44 (d, J = 16.0, 1H), 3.80 (s, 3H), 3.39 (t, J = 5.8 Hz, 2H), 3.25 (s, 3H), 2.15 (t, J = 7.0 Hz, 2H), 1.40 – 1.29 (m, 2H), 1.11 – 1.04 (m, 3H), 0.99 (d, J = 3.2 Hz, 18H). <sup>13</sup>C NMR (126 MHz, Chloroform-d) δ 166.75, 154.63, 142.67, 139.01, 132.84, 131.03, 129.59, 128.92, 127.32, 120.89, 94.58, 74.68, 61.26, 51.94, 36.42, 31.00, 18.10, 18.03, 18.02, 15.17, 11.96. IR (neat): 2943, 2865, 2225, 1719, 1640, 1171, 1104, 882, 733, 680.  $[M+Na]^+$  calcd. for  $[C_{26}H_{39}NNaO_4Si]^+$ , 480.2541; found 480.2537.

## Gold-catalyzed intermolecular ynamide isomerization and D-A reactions with dienophiles

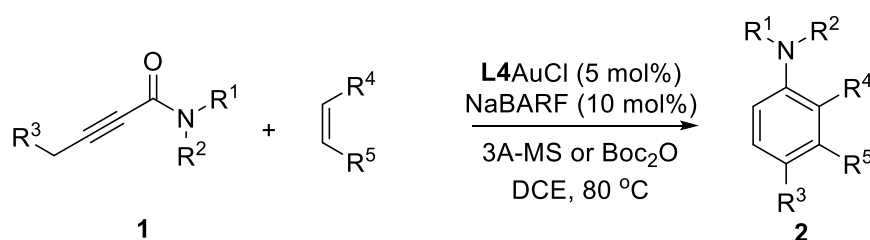

**General procedure A:** To a dried, Ar protected Schlenk tube were added sequentially 0.15 mmol ynamide **1**, 0.30 mmol dienophile (2 equiv.), 0.0075-0.0150 mmol L4AuCl (5-10 mol%), 0.015-0.030 mmol NaBARF (10-20 mol%), 3Å molecular sieves or Boc<sub>2</sub>O and 3 mL anhydrous DCE. The reaction was then heated at the 80 °C for 12-24 h and monitored by TLC or NMR. The reaction was concentrated under reduced pressure. The residue was purified through silica gel flash chromatography to obtain the pure product **2** or **6**.

### 2-Phenyl-4-propyl-7-(pyrrolidin-1-yl)isoindoline-1,3-dione (**2a**)

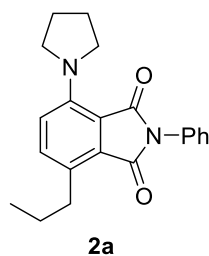

Compound **2a** was prepared following general procedure A. The reaction was heated at 80 °C for 18 h using L4AuCl (5 mol%), NaBARF (10 mol%) and Boc<sub>2</sub>O (2 equiv.) to give **2a** (36.6 mg) in 73% yield. <sup>1</sup>H NMR (500 MHz, Chloroform-*d*) δ 7.52 – 7.45 (m, 2H), 7.45 – 7.40 (m, 2H), 7.38 – 7.33 (m, 1H), 7.30 (d, *J* = 8.8 Hz, 1H), 6.96 (d, *J* = 8.7 Hz, 1H), 3.64 – 3.54 (m, 4H), 3.07 – 2.96 (m, 2H), 2.03 – 1.94 (m, 4H), 1.72 – 1.61 (m, 2H), 0.98 (t, *J* = 7.3 Hz, 3H). <sup>13</sup>C NMR (126 MHz, CDCl<sub>3</sub>) δ 168.04, 166.93, 145.52, 137.14, 132.49, 131.86, 129.72, 128.97, 127.66, 127.13, 120.91, 111.45, 51.91, 32.75, 25.93, 24.33, 14.14. IR (neat): 2960, 2929, 2869, 1702, 1642, 1501, 1375, 1190,

1115, 939, 765. MS-ESI ( $m/z$ ):  $[M+H]^+$  calcd. for  $[C_{21}H_{23}N_2O_2]^+$ , 335.1754; found 335.1741.

**4-Hydroxy-2-phenyl-4-propyl-7-(pyrrolidin-1-yl)-3a,4-dihydro-1H-isoindole-1,3(2H)-dione (2a')**

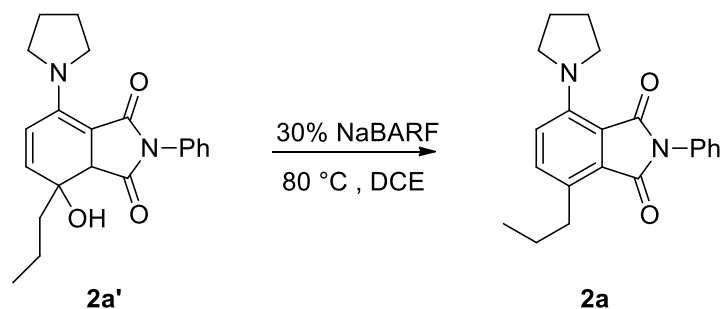

The labile **2a'** was separated from compound **2a** by column chromatography.  $^1\text{H}$  NMR (600 MHz, Chloroform- $d$ )  $\delta$  7.48 – 7.43 (m, 2H), 7.37 – 7.31f (m, 3H), 6.39 (d,  $J = 10.1$  Hz, 1H), 6.18 (d,  $J = 10.1$  Hz, 1H), 4.61 – 3.32 (bs, 2H, a 1H singlet at 3.90 and a 2H multiplet at 3.62 – 3.51), 3.04 (s, 1H, OH), 2.16 – 2.00 (m, 2H), 1.84 (m, 3H), 1.65 – 1.54 (m, 1H), 1.41 (ddd,  $J = 13.3, 12.2, 4.3$  Hz, 1H), 1.31 – 1.23 (m, 1H), 0.87 (t,  $J = 7.3$  Hz, 3H).  $^{13}\text{C}$  NMR (126 MHz, Chloroform- $d$ )  $\delta$  175.71, 165.25, 148.20, 147.45, 133.04, 128.98, 128.97, 127.93, 127.66, 127.13, 127.01, 121.16, 120.89, 83.92, 74.66, 53.66, 51.90, 36.49, 32.74, 25.93, 25.63, 16.57, 14.73. IR (neat): 3440 (broad peak), 2957, 2870, 1666, 1533, 1338, 1094, 743, 614. MS-ESI ( $m/z$ ):  $[M+Na]^+$  calcd. for  $[C_{21}H_{24}N_2NaO_3]^+$ , 375.1679; found 375.1679. Compound **2a'** was converted to Compound **2a** under treatment of 30% NaBARF at 80 °C in DCE overnight confirmed by crude NMR.

**4-(Dimethylamino)-2-phenyl-7-propylisoindoline-1,3-dione (2b)**

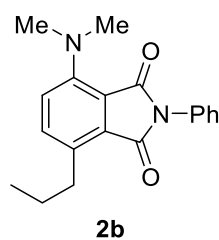

Compound **2b** was prepared following general procedure A. The reaction was heated at 80 °C for 18 h using **L4AuCl** (5 mol%), NaBARF (10 mol%) and  $\text{Boc}_2\text{O}$  (2 equiv.)

to give **2b** (39.7 mg) in 86% yield.  $^1\text{H}$  NMR (400 MHz, Chloroform-*d*)  $\delta$  7.53 – 7.32 (m, 6H), 7.11 (d,  $J$  = 8.6 Hz, 1H), 3.07 (s, 6H), 3.05 – 2.98 (m, 2H), 1.67 (h,  $J$  = 7.4 Hz, 2H), 0.98 (t,  $J$  = 7.3 Hz, 3H).  $^{13}\text{C}$  NMR (101 MHz,  $\text{cdCl}_3$ )  $\delta$  167.92, 166.57, 149.40, 137.36, 133.98, 132.16, 129.73, 129.00, 127.76, 126.95, 122.65, 115.76, 43.75, 32.80, 24.27, 14.11. IR (neat): 3066, 1710, 1386, 1363, 1117, 760, 685, 626. MS-ESI ( $m/z$ ):  $[\text{M}+\text{H}]^+$  calcd. for  $[\text{C}_{19}\text{H}_{21}\text{N}_2\text{O}_2]^+$ , 309.1598; found 309.1616.

#### 4-(Dibenzylamino)-7-ethyl-2-phenylisoindoline-1,3-dione (**2c**)

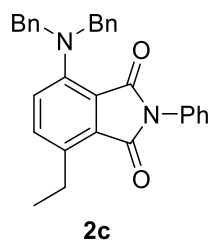

Compound **2c** was prepared following general procedure A. The reaction was heated at 80 °C for 18 h using **L4AuCl** (5 mol%), NaBARF (10 mol%) and  $\text{Boc}_2\text{O}$  (2 equiv.) to give **2c** (59.5 mg) in 89% yield.  $^1\text{H}$  NMR (500 MHz, Chloroform-*d*)  $\delta$  7.56 – 7.46 (m, 6H), 7.43 – 7.20 (m, 18H), 7.16 (d,  $J$  = 8.8 Hz, 2H), 4.57 (s, 6H), 3.11 (q,  $J$  = 7.5 Hz, 3H), 1.29 (t,  $J$  = 7.4 Hz, 6H).  $^{13}\text{C}$  NMR (126 MHz,  $\text{CDCl}_3$ )  $\delta$  167.83, 166.60, 148.11, 137.90, 136.66, 136.42, 132.17, 129.70, 129.05, 128.56, 128.17, 127.87, 127.32, 127.07, 126.15, 118.21, 56.61, 24.11, 14.99. IR (neat): 3028, 2931, 2967, 1705, 1642, 1496, 1381, 1191, 738. MS-ESI ( $m/z$ ):  $[\text{M}+\text{H}]^+$  calcd. for  $[\text{C}_{30}\text{H}_{27}\text{N}_2\text{O}_2]^+$ , 447.2067; found 447.2083.

#### 2-Phenyl-4-(piperidin-1-yl)-7-propylisoindoline-1,3-dione (**2d**)

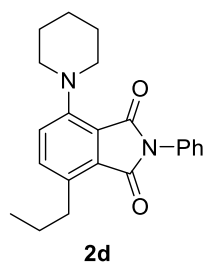

Compound **2d** was prepared following general procedure A. The reaction was heated at 80 °C for 18 h using **L4AuCl** (5 mol%), NaBARF (10 mol%) and  $\text{Boc}_2\text{O}$  (2 equiv.)

to give **2d** (42.8 mg) in 82% yield.  $^1\text{H}$  NMR (400 MHz, Chloroform-*d*)  $\delta$  7.53 – 7.33 (m, 6H), 7.15 (d,  $J$  = 8.6 Hz, 1H), 3.24 (t,  $J$  = 5.3 Hz, 4H), 3.03 (dd,  $J$  = 8.6, 6.8 Hz, 2H), 1.80 (p,  $J$  = 5.6 Hz, 4H), 1.73 – 1.61 (m, 4H), 0.98 (t,  $J$  = 7.3 Hz, 3H).  $^{13}\text{C}$  NMR (101 MHz,  $\text{cdCl}_3$ )  $\delta$  167.99, 166.71, 150.05, 137.57, 135.08, 132.12, 129.70, 129.08, 127.89, 127.09, 123.79, 118.22, 53.10, 32.89, 28.61, 26.18, 24.28, 24.18, 14.11. IR (neat): 2957, 2935, 2857, 1708, 1636, 1500, 1383, 1188, 931, 745. MS-ESI ( $m/z$ ):  $[\text{M}+\text{H}]^+$  calcd. for  $[\text{C}_{22}\text{H}_{25}\text{N}_2\text{O}_2]^+$ , 349.1911; found 349.1915.

#### 4-Morpholino-2-phenyl-7-propylisoindoline-1,3-dione (**2e**)

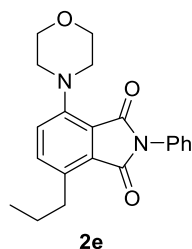

Compound **2e** was prepared following general procedure A. The reaction was heated at 80 °C for 18 h using **L4AuCl** (5 mol%), NaBARF (10 mol%) and  $\text{Boc}_2\text{O}$  (2 equiv.) to give **2e** (42.0 mg) in 80% yield.  $^1\text{H}$  NMR (400 MHz, Chloroform-*d*)  $\delta$  7.54 – 7.31 (m, 6H), 7.15 (d,  $J$  = 8.5 Hz, 1H), 3.98 – 3.86 (m, 4H), 3.36 – 3.25 (m, 4H), 3.09 – 3.00 (m, 2H), 1.76 – 1.61 (m, 2H), 0.98 (t,  $J$  = 7.3 Hz, 3H).  $^{13}\text{C}$  NMR (101 MHz,  $\text{cdCl}_3$ )  $\delta$  167.81, 166.78, 148.96, 137.89, 136.17, 131.94, 129.85, 129.18, 128.11, 127.07, 123.25, 118.80, 67.14, 51.82, 32.92, 24.28, 14.11. IR (neat): 2960, 2864, 1707, 1619, 1499, 1382, 1116, 935, 747. MS-ESI ( $m/z$ ):  $[\text{M}+\text{Na}]^+$  calcd. for  $[\text{C}_{21}\text{H}_{22}\text{N}_2\text{O}_3\text{Na}]^+$ , 373.1523; found 373.1542.

#### 4-Ethyl-7-(methyl(phenyl)amino)-2-phenylisoindoline-1,3-dione (**2f**)

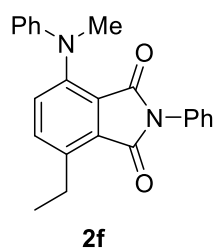



Compound **2f** was prepared following general procedure A. The reaction was heated at 80 °C for 12 h using **L4AuCl** (5 mol%), NaBARF (10 mol%) and 3Å molecular sieves to give **2f** (50.2 mg) in 94% yield. <sup>1</sup>H NMR (400 MHz, Chloroform-*d*) δ 7.53 – 7.32 (m, 7H), 7.30 – 7.21 (m, 2H), 6.98 – 6.94 (m, 3H), 6.93 – 6.89 (m, 3H), 3.45 (s, 2H), 3.17 (q, *J* = 7.5 Hz, 3H), 1.33 (t, *J* = 7.5 Hz, 3H). <sup>13</sup>C NMR (101 MHz, cdcl<sub>3</sub>) δ 167.55, 165.44, 148.12, 145.35, 140.46, 136.46, 132.58, 131.93, 129.60, 129.21, 129.05, 127.94, 126.87, 122.88, 120.58, 117.35, 41.05, 24.39, 15.08. IR (neat): 2966, 2931, 1708, 1643, 1493, 1379, 1188, 893, 746. MS-ESI (*m/z*): [M+Na]<sup>+</sup> calcd. for [C<sub>23</sub>H<sub>20</sub>N<sub>2</sub>O<sub>2</sub>Na]<sup>+</sup>, 379.1417; found 379.1418.

#### 4-(Diphenylamino)-2-phenyl-7-propylisoindoline-1,3-dione (**2g**)

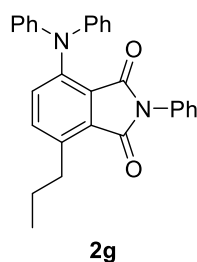

Compound **2g** was prepared following general procedure A. The reaction was heated at 80 °C for 12 h using **L4AuCl** (5 mol%), NaBARF (10 mol%) and 3Å molecular sieves to give **2g** (62.9 mg) in 97% yield. <sup>1</sup>H NMR (400 MHz, Chloroform-*d*) δ 7.48 – 7.37 (m, 3H), 7.35 – 7.22 (m, 8H), 7.13 – 7.01 (m, 6H), 3.19 – 3.02 (m, 2H), 1.83 – 1.67 (m, 2H), 1.05 (t, *J* = 7.3 Hz, 3H). <sup>13</sup>C NMR (101 MHz, cdcl<sub>3</sub>) δ 167.47, 164.28, 147.85, 143.37, 139.09, 137.40, 133.52, 131.86, 129.88, 129.31, 128.92, 127.73, 126.78, 123.65, 123.47, 123.45, 33.19, 24.23, 14.21. IR (neat): 3035, 2931, 1765, 1715, 1588, 1487, 1376, 1296, 1193, 1114, 753. MS-ESI (*m/z*): [M+H]<sup>+</sup> calcd. for [C<sub>29</sub>H<sub>25</sub>N<sub>2</sub>O<sub>2</sub>]<sup>+</sup>, 433.1880; found 433.1881.

#### 4-(Dibenzylamino)-2-phenyl-7-(2-((triisopropylsilyl)oxy)ethyl)isoindoline-1,3-dione (**2h**)

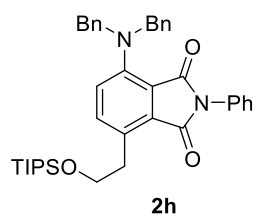

Compound **2h** was prepared following general procedure A. The reaction was heated at 80 °C for 24 h using **L4AuCl** (5 mol%), NaBARF (10 mol%) and Boc<sub>2</sub>O (2 equiv.) to give **2h** (65.8 mg) in 71% yield. <sup>1</sup>H NMR (500 MHz, Chloroform-*d*) δ 7.53 – 7.45 (m, 4H), 7.43 – 7.36 (m, 2H), 7.32 – 7.21 (m, 11H), 7.11 (d, *J* = 8.6 Hz, 1H), 4.56 (s, 4H), 3.99 (t, *J* = 6.0 Hz, 2H), 3.30 (t, *J* = 6.0 Hz, 2H), 0.98 (d, *J* = 6.1 Hz, 21H). <sup>13</sup>C NMR (126 MHz, CDCl<sub>3</sub>) δ 167.91, 166.64, 148.51, 138.88, 137.90, 132.25, 132.19, 130.28, 129.09, 128.58, 128.18, 127.91, 127.34, 127.09, 125.46, 117.99, 63.54, 56.69, 34.42, 18.10, 12.04. IR (neat): 2941, 2891, 2865, 1711, 1639, 1497, 1380, 1114, 884, 736. MS-ESI (*m/z*): [M+Na]<sup>+</sup> calcd. for [C<sub>39</sub>H<sub>46</sub>N<sub>2</sub>O<sub>3</sub>SiNa]<sup>+</sup>, 641.3170; found 641.3182.

### 2-(7-(Dibenzylamino)-1,3-dioxo-2-phenylisoindolin-4-yl)ethyl acetate (**2i**)

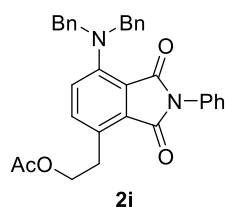

Compound **2i** was prepared following general procedure A. The reaction was heated at 80 °C for 24 h using **L4AuCl** (10 mol%), NaBARF (20 mol%) and Boc<sub>2</sub>O (2 equiv.) to give **2i** (58.3 mg) in 77% yield. <sup>1</sup>H NMR (500 MHz, Chloroform-*d*) δ 7.55 – 7.44 (m, 4H), 7.42 – 7.37 (m, 1H), 7.35 – 7.21 (m, 11H), 7.13 (d, *J* = 8.6 Hz, 1H), 4.59 (s, 4H), 4.36 (t, *J* = 6.8 Hz, 2H), 3.40 (t, *J* = 6.8 Hz, 2H), 2.01 (s, 3H). <sup>13</sup>C NMR (126 MHz, CDCl<sub>3</sub>) δ 171.00, 167.71, 166.45, 148.76, 137.68, 137.61, 131.99, 130.68, 129.62, 129.08, 128.60, 128.12, 127.99, 127.39, 127.01, 125.82, 118.05, 64.10, 56.59, 30.24, 21.05. IR (neat): 2954, 2928, 2851, 1737, 1709, 1621, 1498, 1383, 1191, 1119,

1036, 887, 738. MS-ESI ( $m/z$ ):  $[M+H]^+$  calcd. for  $[C_{32}H_{29}N_2O_4]^+$ , 505.2122; found 505.2131.

***tert*-Butyl-(2-(7-(dibenzylamino)-1,3-dioxo-2-phenylisoindolin-4-yl)ethyl)(tosyl)carbamate (**2j**)**

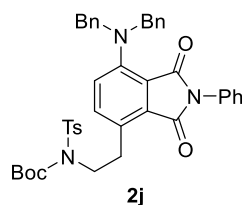

Compound **2j** was prepared following general procedure A. The reaction was heated at 80 °C for 24 h using **L4AuCl** (10 mol%), NaBARF (20 mol%) and Boc<sub>2</sub>O (2 equiv.) to give **2j** (81.5 mg) in 76% yield. <sup>1</sup>H NMR (500 MHz, Chloroform-*d*) δ 7.75 (d,  $J$  = 8.2 Hz, 2H), 7.52 – 7.35 (m, 6H), 7.27 (h,  $J$  = 6.8 Hz, 12H), 7.16 (d,  $J$  = 8.6 Hz, 1H), 4.57 (s, 4H), 4.24 (t,  $J$  = 6.5 Hz, 2H), 3.49 (t,  $J$  = 6.5 Hz, 2H), 2.41 (s, 3H), 1.25 (s, 9H). <sup>13</sup>C NMR (126 MHz, CDCl<sub>3</sub>) δ 167.78, 166.62, 150.89, 148.89, 144.16, 138.24, 137.72, 137.52, 132.16, 131.19, 130.13, 129.28, 128.99, 128.58, 128.18, 127.98, 127.86, 127.34, 127.12, 125.76, 118.00, 84.06, 56.52, 47.45, 31.51, 27.89, 21.68. IR (neat): 3029, 2984, 2937, 1639, 1497, 1368, 1154, 811, 738. MS-ESI ( $m/z$ ):  $[M+Na]^+$  calcd. for  $[C_{42}H_{41}N_3O_6SNa]^+$ , 738.2608; found 738.2567.

**4-(((*tert*-Butyldimethylsilyl)oxy)methyl)-7-(dibenzylamino)-2-phenylisoindoline-1,3-dione (**2k**)**

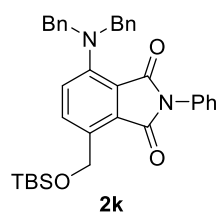

Compound **2k** was prepared following general procedure A. The reaction was heated at 80 °C for 24 h using **L4AuCl** (10 mol%), NaBARF (20 mol%) and Boc<sub>2</sub>O (2 equiv.) to give **2k** (65.8 mg) in 78% yield. <sup>1</sup>H NMR (500 MHz, Chloroform-*d*) δ 7.80 (dd,  $J$  =

8.7, 1.6 Hz, 1H), 7.54 – 7.44 (m, 4H), 7.40 (dd,  $J = 7.2, 1.4$  Hz, 1H), 7.34 – 7.21 (m, 11H), 5.23 (d,  $J = 1.6$  Hz, 2H), 4.61 (s, 4H), 0.98 (d,  $J = 1.7$  Hz, 9H), 0.15 (d,  $J = 1.7$  Hz, 6H).  $^{13}\text{C}$  NMR (126 MHz,  $\text{CDCl}_3$ )  $\delta$  167.74, 166.78, 148.57, 137.81, 133.76, 133.30, 132.06, 129.10, 128.61, 128.38, 128.14, 128.14, 127.96, 127.37, 126.99, 126.04, 117.23, 60.70, 56.63, 26.12, 18.55, -5.22. IR (neat): 3060, 2849, 1701, 1689, 1494, 1376, 762, 739, 692. MS-ESI ( $m/z$ ):  $[\text{M}+\text{Na}]^+$  calcd. for  $[\text{C}_{35}\text{H}_{38}\text{N}_2\text{O}_3\text{SiNa}]^+$ , 585.2544, found 585.2527.

#### 4-Cyclohexyl-7-(dibenzylamino)-2-phenylisoindoline-1,3-dione (**2l**)

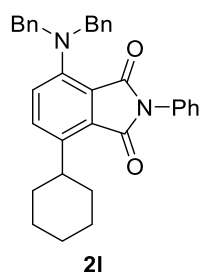

Compound **2l** was prepared following general procedure A. The reaction was heated at 80 °C for 24 h using **L4AuCl** (5 mol%), NaBARF (10 mol%) and  $\text{Boc}_2\text{O}$  (2 equiv.) to give **2l** (62.3 mg) in 83% yield.  $^1\text{H}$  NMR (500 MHz, Chloroform- $d$ )  $\delta$  7.52 – 7.18 (m, 17H), 4.56 (s, 4H), 3.82 (tt,  $J = 11.6, 3.3$  Hz, 1H), 1.85 (m, 5H), 1.55 – 1.27 (m, 6H).  $^{13}\text{C}$  NMR (126 MHz, Chloroform- $d$ )  $\delta$  168.06, 166.54, 147.95, 140.74, 137.94, 133.48, 132.16, 129.07, 129.05, 128.56, 128.19, 127.92, 127.31, 127.16, 126.26, 121.08, 118.09, 56.57, 37.45, 33.58, 26.88, 26.36, 26.29, 24.24. IR (neat): 2926, 2851, 1706, 1645, 1498, 1382, 1194, 1118, 884, 737. MS-ESI ( $m/z$ ):  $[\text{M}+\text{H}]^+$  calcd. for  $[\text{C}_{34}\text{H}_{33}\text{N}_2\text{O}_2]^+$ , 501.2537; found 501.2523.

#### 4-(Dibenzylamino)-2-phenylisoindoline-1,3-dione (**2m**)

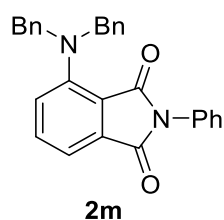

Compound **2m** was prepared following general procedure A. The reaction was heated at 80 °C for 24 h using **L4AuCl** (5 mol%), NaBARF (10 mol%) and Boc<sub>2</sub>O (2 equiv.) to give **2m** (37.6 mg) in 60% yield. <sup>1</sup>H NMR (500 MHz, Chloroform-d) δ 7.54 – 7.15 (m, 18H), 4.64 (s, 4H). <sup>13</sup>C NMR (126 MHz, Chloroform-d) δ 167.44, 166.95, 149.73, 137.63, 135.13, 134.73, 132.13, 129.15, 128.66, 128.07, 128.03, 127.45, 127.01, 125.41, 117.04, 115.37, 56.58. IR (neat): 2923, 1701, 1612, 1484, 1377, 1112, 736, 690. MS-ESI (*m/z*): [M+H]<sup>+</sup> calcd. for [C<sub>28</sub>H<sub>23</sub>N<sub>2</sub>O<sub>2</sub>]<sup>+</sup>, 419.1754; found 419.1746.

#### 4-(dibenzylamino)-7-(4-methoxyphenyl)-2-phenylisoindoline-1,3-dione (**2n**)

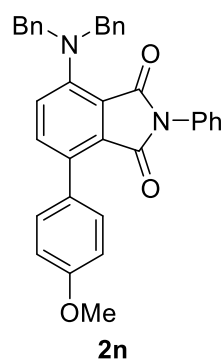

Compound **2n** was prepared following general procedure A. The reaction was heated at 80 °C for 8 h using **L4AuCl** (5 mol%), NaBARF (10 mol%) and Boc<sub>2</sub>O (2 equiv.) to give **2n** (70 mg) in 91% yield. <sup>1</sup>H NMR (500 MHz, Chloroform-d) δ 7.46 (m, 7H), 7.33 – 7.20 (m, 12H), 6.99 – 6.88 (m, 2H), 4.62 (s, 4H), 3.84 (s, 3H). <sup>13</sup>C NMR (126 MHz, cdcl<sub>3</sub>) δ 166.99, 166.42, 159.72, 148.71, 137.76, 137.45, 133.17, 132.10, 130.92, 129.05, 128.98, 128.95, 128.66, 128.17, 127.88, 127.44, 127.10, 125.91, 118.28, 113.50, 56.79, 55.41. IR (neat): 1706, 1607, 1376, 1178, 765, 739, 692. MS-ESI (*m/z*): [M+Na]<sup>+</sup> calcd. for [C<sub>35</sub>H<sub>28</sub>N<sub>2</sub>NaO<sub>3</sub>]<sup>+</sup>, 547.1992; found 549.1976.

#### 4-(dibenzylamino)-2-phenyl-7-(thiophen-3-yl)isoindoline-1,3-dione (**2o**)

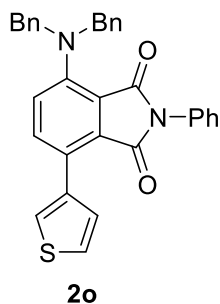

Compound **2o** was prepared following general procedure A. The reaction was heated at 80 °C for 6 h using **L4AuCl** (5 mol%), NaBARF (10 mol%) and Boc<sub>2</sub>O (2 equiv.) to give **2o** (60 mg) in 80% yield. <sup>1</sup>H NMR (500 MHz, Chloroform-d) δ 7.62 (dd, *J* = 3.0, 1.3 Hz, 1H), 7.55 (d, *J* = 8.7 Hz, 1H), 7.51 – 7.44 (m, 4H), 7.43 – 7.23 (m, 14H), 4.63 (s, 4H). <sup>13</sup>C NMR (126 MHz, CDCl<sub>3</sub>) δ 167.02, 166.35, 148.88, 137.67, 137.19, 137.03, 132.06, 129.27, 129.12, 129.06, 128.68, 128.16, 128.00, 127.72, 127.48, 127.12, 125.98, 124.97, 124.66, 56.82. IR (neat): 3027, 1703, 1597, 1488, 1378, 1119, 734, 690. MS-ESI (*m/z*): [M+Na]<sup>+</sup> calcd. for [C<sub>32</sub>H<sub>24</sub>N<sub>2</sub>NaO<sub>2</sub>S]<sup>+</sup>, 523.1451; found 523.1459.

#### 4-Ethyl-7-(methyl(phenyl)amino)isobenzofuran-1,3-dione (**2f'**)

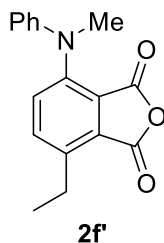

To a dried, Ar protected schlenk tube were added sequentially 0.15 mmol ynamide **1f**, 0.0075 mmol **L4AuCl** (5 mol%), 0.015 mmol NaBARF (10 mol%) and 3 mL anhydrous DCE as solvent. The reaction was then heated at 80 °C for 10 h. Maleic anhydride (2 equiv) was added and stirred for 5 h at room temperature. The reaction was concentrated under reduced pressure. The residue was purified through silica gel flash chromatography to give **2f'** (34.6 mg) in 82% yield. <sup>1</sup>H NMR (500 MHz, Chloroform-*d*) δ 7.32 – 7.25 (m, 8H), 7.23 – 7.19 (m, 2H), 7.16 (d, *J* = 8.2 Hz, 1H), 7.10 (d, *J* = 8.2 Hz, 1H), 4.56 – 4.36 (m, 4H), 4.16 (s, 4H), 2.95 (t, *J* = 6.0 Hz, 2H), 1.35 (t, *J* = 7.2 Hz,

3H).  $^{13}\text{C}$  NMR (126 MHz,  $\text{CDCl}_3$ )  $\delta$  168.40, 163.31, 148.43, 137.68, 135.50, 135.08, 129.14, 128.75, 128.35, 128.25, 127.23, 123.45, 67.10, 61.99, 57.96, 27.79, 14.01. IR (neat): 3038, 2971, 2934, 1834, 1766, 1597, 1495, 1210, 910, 755. MS-ESI ( $m/z$ ):  $[\text{M}+\text{H}]^+$  calcd. for  $[\text{C}_{17}\text{H}_{16}\text{NO}_3]^+$ , 282.1125; found 282.1132.

### 5-ethyl-N-methyl-N-phenylfuran-2-amine (5)

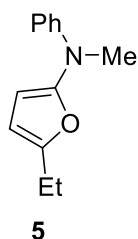

To a dried, Ar-protected Schlenk tube were added sequentially 0.15 mmol ynamide **1f**, 0.0075 mmol **L4AuCl** (5 mol%), 0.015 mmol NaBARF (10 mol%) and 3 mL anhydrous DCE as the solvent. The reaction was then heated at 80 °C for 12 h. After cooled to room temperature. 0.05 mmol 1,3,5-trimethoxy benzene solution was injected under Ar as an internal reference. The reaction finished in 12 h, and the NMR yield is 85%. Silica gel was added, and the solvent was removed under vacuum. Silica gel chromatography under Ar afforded the oxygen-sensitive furan intermediate **5** in about 30% isolated yield.  $^1\text{H}$  NMR (500 MHz, Chloroform-*d*)  $\delta$  7.23 (t,  $J = 7.5$  Hz, 2H), 6.87 – 6.81 (m, 3H), 5.95 (d,  $J = 1.8$  Hz, 1H), 5.78 (d,  $J = 3.1$  Hz, 1H), 3.25 (s, 3H), 2.60 (q,  $J = 7.6$  Hz, 2H), 1.22 (t,  $J = 7.5$  Hz, 3H).  $^{13}\text{C}$  NMR (126 MHz,  $\text{CDCl}_3$ )  $\delta$  153.00, 152.67, 148.11, 129.04, 119.44, 114.95, 104.78, 99.32, 39.17, 21.65, 12.24. 2D NMR COSY, HSQC and HMBC are also attached. IR (neat): 2920, 1498, 1127, 749, 691, 497. MS-ESI ( $m/z$ ):  $[\text{M}+\text{H}]^+$  calcd. for  $[\text{C}_{13}\text{H}_{16}\text{NO}]^+$ , 202.1226; found 202.1232.

### 2-(3-Ethyl-5-hydroxynaphtho[1,2-*b*]furan-2-yl)-N-methyl-N-phenylacetamide (6)

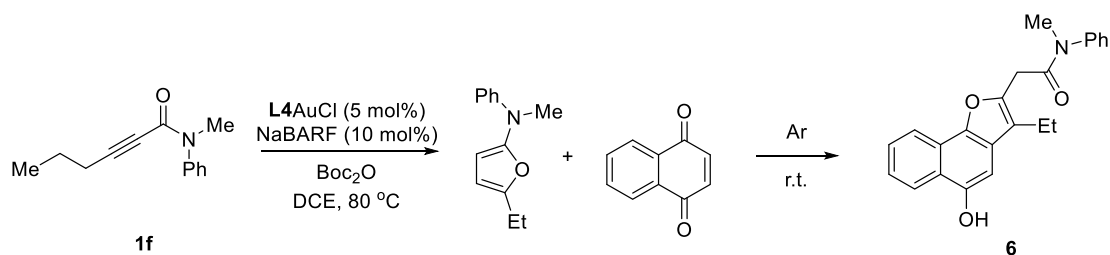

To a dried, Ar protected schlenk tube were added sequentially 0.15 mmol ynamide **1f**, 0.0075 mmol **L4AuCl** (5 mol%), 0.015 mmol NaBARF (10 mol%), Boc<sub>2</sub>O and 3 mL anhydrous DCE. The reaction was heated at the 80 °C for 12 h, The reaction was cooled to room temperature, 0.30 mmol naphthalene-1,4-dione (2 equiv.) was added under Ar atmosphere. After 2 more hours at room temperature. The reaction was concentrated under reduced pressure. The residue was purified through silica gel flash chromatography to give **6** (45.8 mg) in 85% yield. <sup>1</sup>H NMR (500 MHz, Chloroform-d) δ 8.18 (d, J = 8.3 Hz, 1H), 8.00 (d, J = 8.1 Hz, 1H), 7.52 – 7.30 (m, 8H), 6.55 (s, 1H), 3.65 (s, 2H), 3.41 (s, 3H), 2.15 (q, J = 7.6 Hz, 2H), 0.97 (t, J = 7.6 Hz, 3H). <sup>13</sup>C NMR (126 MHz, Chloroform-d) δ 169.87, 147.91, 145.41, 144.36, 143.74, 130.11, 128.38, 127.56, 126.05, 123.78, 123.68, 123.08, 122.96, 121.33, 120.30, 119.71, 38.22, 32.70, 16.70, 14.60. IR (neat): 3269 (broad peak), 2965, 1634, 1421, 1247, 1223, 1125, 1071, 765, 699, 557. MS-ESI (*m/z*): [M+Na]<sup>+</sup> calcd. for [C<sub>23</sub>H<sub>21</sub>NNaO<sub>3</sub>]<sup>+</sup>, 382.1414; found 382.1415.

### Gold catalyzed intramolecular ynamide isomerization and D-A reactions

**General procedure B:** To a dried, Ar protected Schlenk tube were added sequentially 0.15 mmol ynamide **7**, 0.0075-0.0150 mmol **L4AuCl** (5-10 mol%), 0.015-0.030 mmol NaBARF (10-20 mol%), Boc<sub>2</sub>O (2equiv.) and 3 mL anhydrous DCE as the solvent. The reaction was then heated at the 80 °C for 24 h and monitored by TLC or NMR. The reaction was concentrated under reduced pressure. The residue was purified through silica gel flash chromatography to obtain pure product **8**.

### 7-(Dibenzylamino)-8-ethylisochroman-1-one (**8a**)

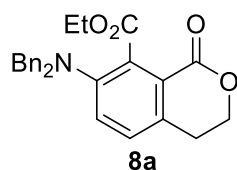



Compound **8a** was prepared following general procedure B. The reaction was heated at 80 °C for 24 h using **L4AuCl** (10 mol%), NaBARF (20 mol%) and Boc<sub>2</sub>O (2 equiv.) to give **8a** (46.7 mg) in 75% yield. <sup>1</sup>H NMR (500 MHz, Chloroform-*d*) δ 7.31 – 7.26 (m, 8H), 7.21 (t, *J* = 6.7 Hz, 2H), 7.16 (d, *J* = 8.3 Hz, 1H), 7.10 (d, *J* = 8.2 Hz, 1H), 4.50 – 4.45 (m, 4H), 4.16 (s, 4H), 2.95 (t, *J* = 6.0 Hz, 2H), 1.35 (t, *J* = 7.2 Hz, 3H). <sup>13</sup>C NMR (126 MHz, CDCl<sub>3</sub>) δ 168.40, 163.31, 148.43, 137.68, 135.50, 135.08, 129.14, 128.75, 128.35, 128.25, 127.23, 123.45, 67.10, 61.99, 57.96, 27.79, 14.01. IR (neat): 3063, 3029, 2984, 1728, 1632, 1495, 1283, 1127, 1027, 961, 742. MS-ESI (*m/z*): [M+H]<sup>+</sup> calcd. for [C<sub>26</sub>H<sub>26</sub>NO<sub>4</sub>]<sup>+</sup>, 416.1856; found 416.1861.

### Methyl 9-methyl-9H-carbazole-4-carboxylate (**8b**)

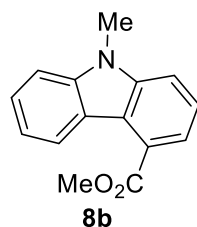

Compound **8b** was prepared following general procedure B. The reaction was heated at 80 °C for 24 h using **L4AuCl** (5 mol%) and NaBARF (10 mol%) to give **8b** (32.3 mg) in 90% yield. <sup>1</sup>H NMR (500 MHz, Chloroform-*d*) δ 8.89 (dt, *J* = 8.2, 1.0 Hz, 1H), 7.87 (dd, *J* = 7.5, 1.0 Hz, 1H), 7.60 (dd, *J* = 8.3, 1.0 Hz, 1H), 7.54 (ddd, *J* = 8.2, 7.0, 1.2 Hz, 1H), 7.50 (dd, *J* = 8.2, 7.5 Hz, 1H), 7.42 (dt, *J* = 8.3, 0.9 Hz, 1H), 7.29 (ddd, *J* = 8.1, 7.0, 1.1 Hz, 1H), 4.08 (s, 3H), 3.86 (s, 3H). <sup>13</sup>C NMR (126 MHz, Chloroform-*d*) δ 168.59, 141.84, 141.78, 126.83, 125.74, 125.37, 124.68, 122.21, 121.49, 121.48, 119.39, 112.74, 108.33, 52.26, 29.27. IR (neat): 2921, 1711, 1439, 1255, 1074, 742, 719. MS-ESI (*m/z*): [M+H]<sup>+</sup> calcd. for [C<sub>15</sub>H<sub>14</sub>NO<sub>2</sub>]<sup>+</sup>, 240.1019; found 240.1038.

### Methyl 3-ethyl-9-methyl-9H-carbazole-4-carboxylate (**8c**)

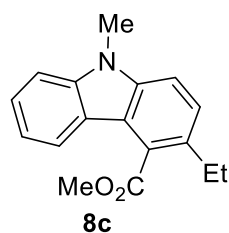

Compound **8c** was prepared following general procedure B. The reaction was heated at 80 °C for 24 h using **L4AuCl** (5 mol%) and NaBARF (10 mol%) to give **8c** (44.8 mg) in 90% yield. <sup>1</sup>H NMR (400 MHz, Chloroform-d) δ 7.92 (dt, J = 8.0, 1.2 Hz, 1H), 7.48 (ddd, J = 8.2, 7.1, 1.2 Hz, 1H), 7.41 – 7.30 (m, 3H), 7.21 (ddd, J = 8.1, 7.1, 1.1 Hz, 1H), 4.12 (s, 3H), 3.80 (s, 3H), 2.84 (q, J = 7.6 Hz, 2H), 1.32 (t, J = 7.6 Hz, 3H). <sup>13</sup>C NMR (151 MHz, Chloroform-d) δ 170.64, 141.55, 139.51, 132.27, 126.63, 126.12, 125.73, 121.64, 121.03, 119.21, 119.15, 110.24, 108.66, 52.37, 29.18, 26.75, 16.84. IR (neat): 2962, 1716, 1467, 1253, 1086, 818, 744, 725. MS-ESI (*m/z*): [M+Na]<sup>+</sup> calcd. for [C<sub>17</sub>H<sub>17</sub>NNaO<sub>2</sub>]<sup>+</sup>, 290.1151; found 290.1167.

**Methyl 9-methyl-3-(2-((triisopropylsilyl)oxy)ethyl)-9H-carbazole-4-carboxylate (8d)**

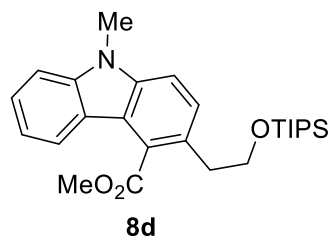

Compound **8d** was prepared following general procedure B. The reaction was heated at 80 °C for 24 h using **L4AuCl** (10 mol%) and NaBARF (20 mol%) to give **8d** (64.6 mg) in 98% yield. <sup>1</sup>H NMR (600 MHz, Chloroform-d) δ 7.90 (d, J = 7.9 Hz, 1H), 7.53 – 7.46 (m, 1H), 7.43 – 7.37 (m, 3H), 7.23 – 7.19 (m, 1H), 4.11 (s, 3H), 3.94 (t, J = 7.5 Hz, 2H), 3.83 (s, 3H), 3.07 (t, J = 7.5 Hz, 2H), 1.19 – 0.95 (m, 21H). <sup>13</sup>C NMR (151 MHz, Chloroform-d) δ 170.44, 141.52, 139.82, 128.30, 126.84, 126.57, 126.18, 121.66, 121.04, 119.28, 119.24, 109.96, 108.70, 65.24, 52.46, 37.40, 29.23, 18.16, 12.13. IR (neat): 2944, 2865, 1720, 1465, 1257, 1091, 882, 816, 741, 683, 641. MS-ESI (*m/z*): [M+Na]<sup>+</sup> calcd. for [C<sub>26</sub>H<sub>37</sub>NNaO<sub>3</sub>Si]<sup>+</sup>, 462.2435; found 462.2444.

## References

- [1] Y. Yasui, S. Tsuchida, H. Miyabe, Y. Takemoto, *J. Org. Chem.*, **2007**, *72*, 5898-5900;
- [2] J. F. Teichert, S. Zhang, A. W. van Zijl, J. W. Slaa, A. J. Minnaard, B. L. Feringa, *Org. Lett.*, **2010**, *12*, 4658-4660;
- [3] A. Martinez-Cuezva, C. Lopez-Leonardo, D. Bautista, M. Alajarin, and J. Berna, *J. Am. Chem. Soc.*, **2016**, *138*, 8726-8729;
- [4] Christine M. Le, Theresa Sperger, Rui Fu, Xiao Hou, Yong Hwan Lim, Franziska Schoenebeck, Mark Lautens, *J. Am. Chem. Soc.*, **2016**, *138*, 14441-14448;

xg-2-182A-h

| Parameter                | Value       |
|--------------------------|-------------|
| 1 Title                  | xg-2-182A-h |
| 2 Solvent                | cdcl3       |
| 3 Relaxation Delay       | 4.8000      |
| 4 Spectrometer Frequency | 399.78      |
| 5 Nucleus                | 1H          |

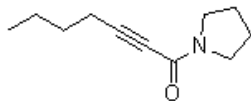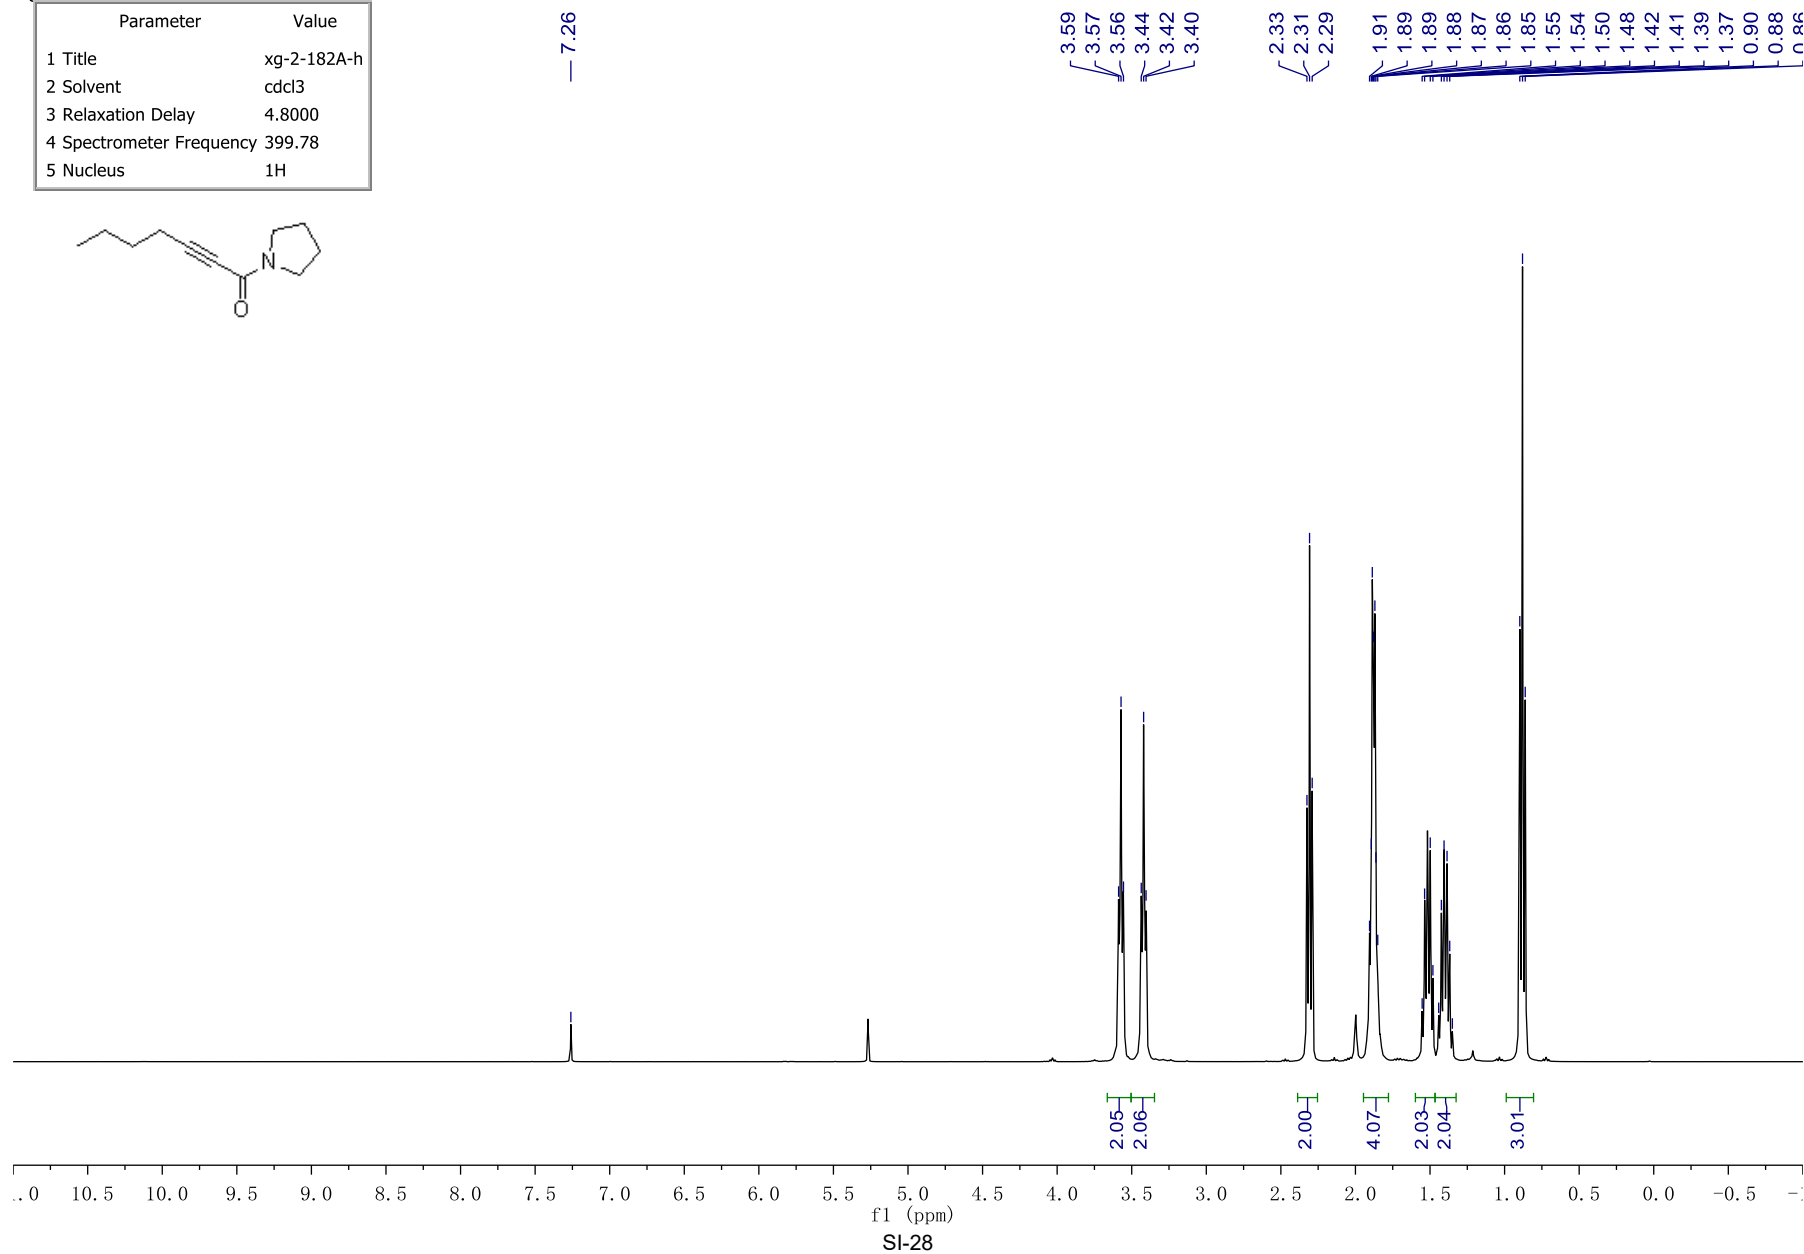

xg-2-182A-c13

| Parameter                | Value         |
|--------------------------|---------------|
| 1 Title                  | xg-2-182A-c13 |
| 2 Solvent                | cdcl3         |
| 3 Relaxation Delay       | 1.0000        |
| 4 Spectrometer Frequency | 100.53        |
| 5 Nucleus                | 13C           |

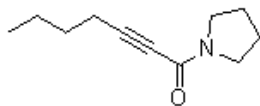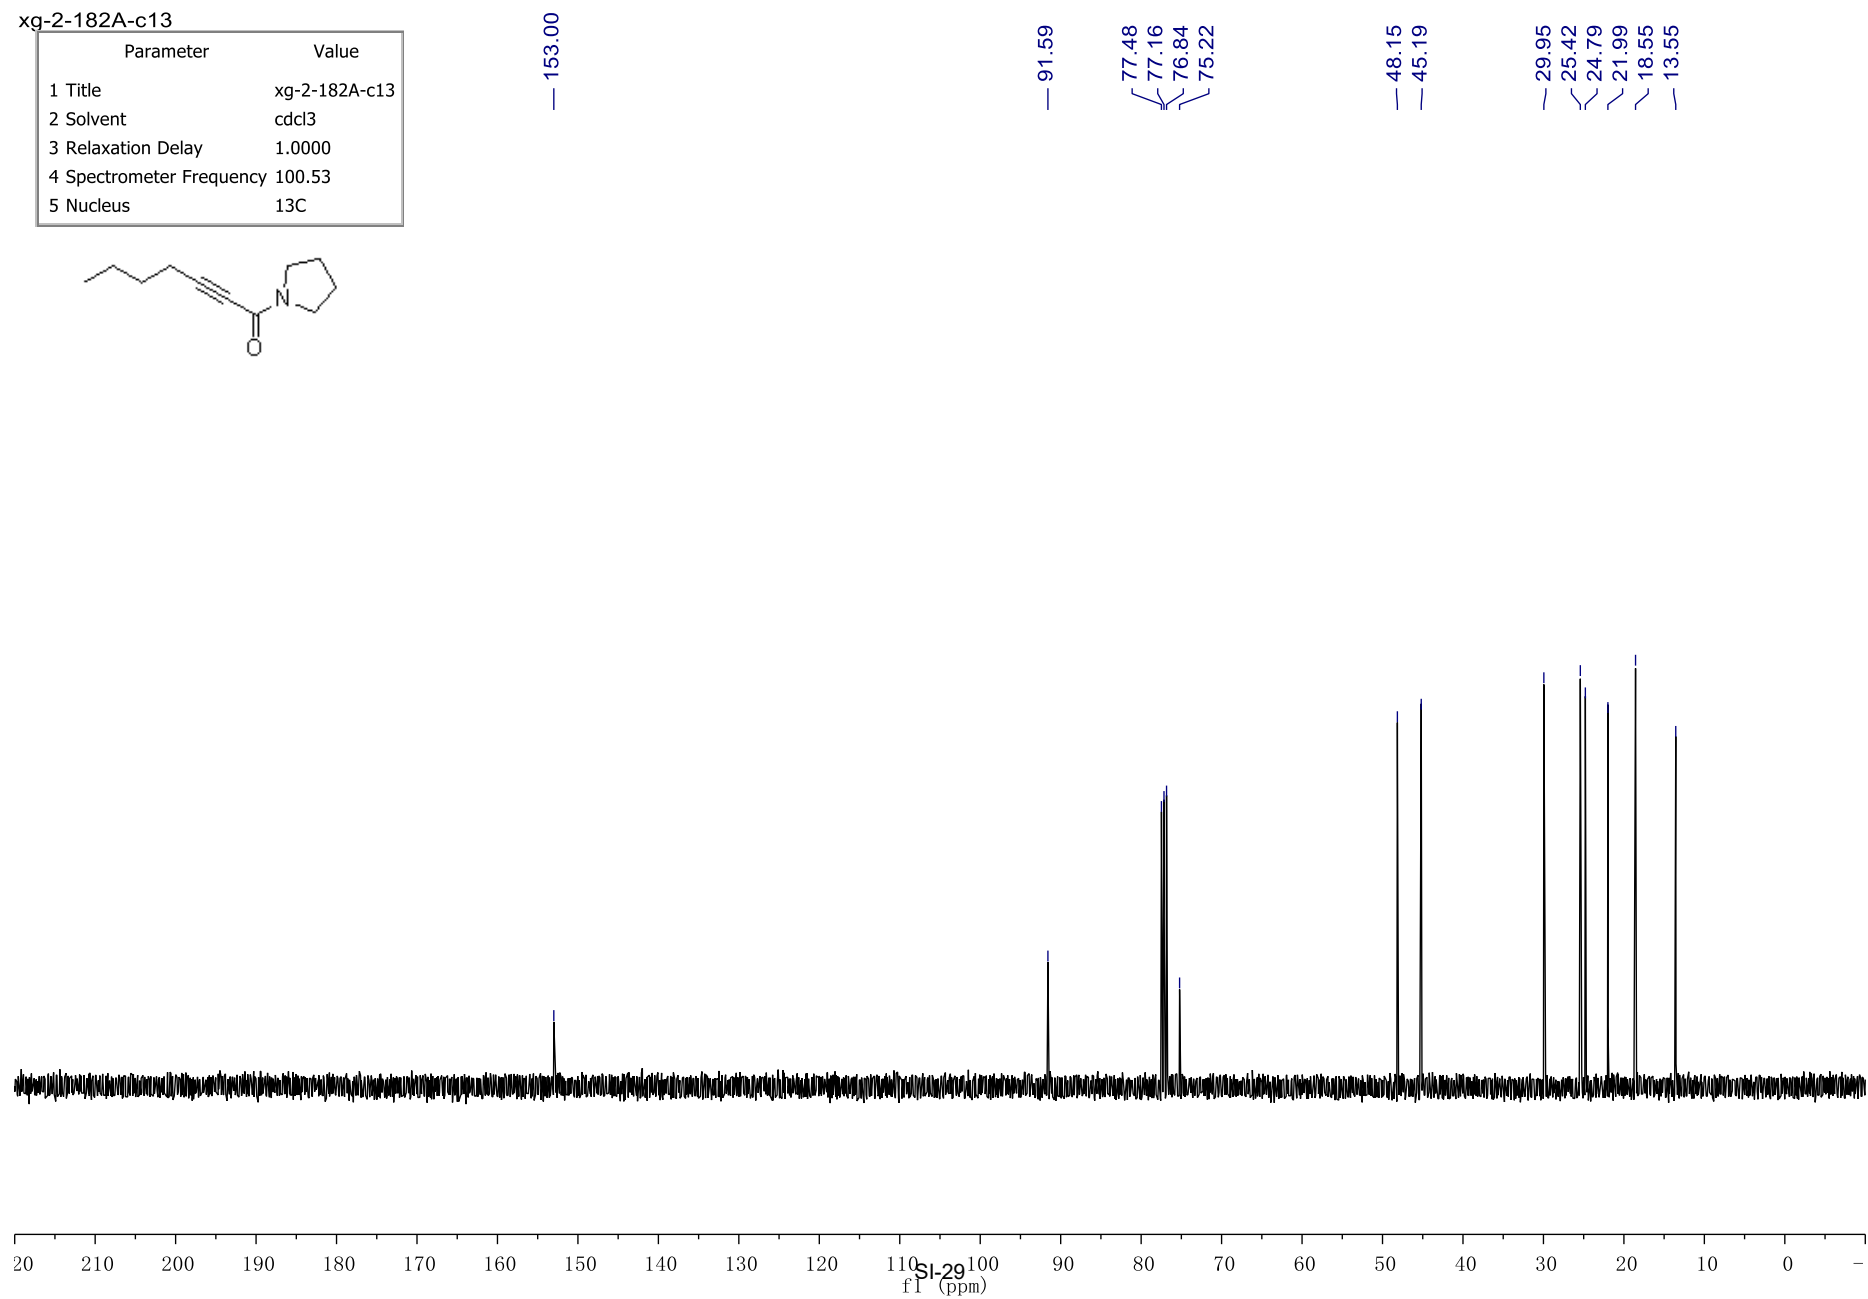

xg-2-204A-h

| Parameter                | Value       |
|--------------------------|-------------|
| 1 Title                  | xg-2-204A-h |
| 2 Solvent                | cdcl3       |
| 3 Relaxation Delay       | 4.8000      |
| 4 Spectrometer Frequency | 399.78      |
| 5 Nucleus                | 1H          |

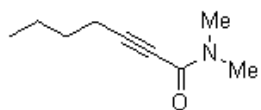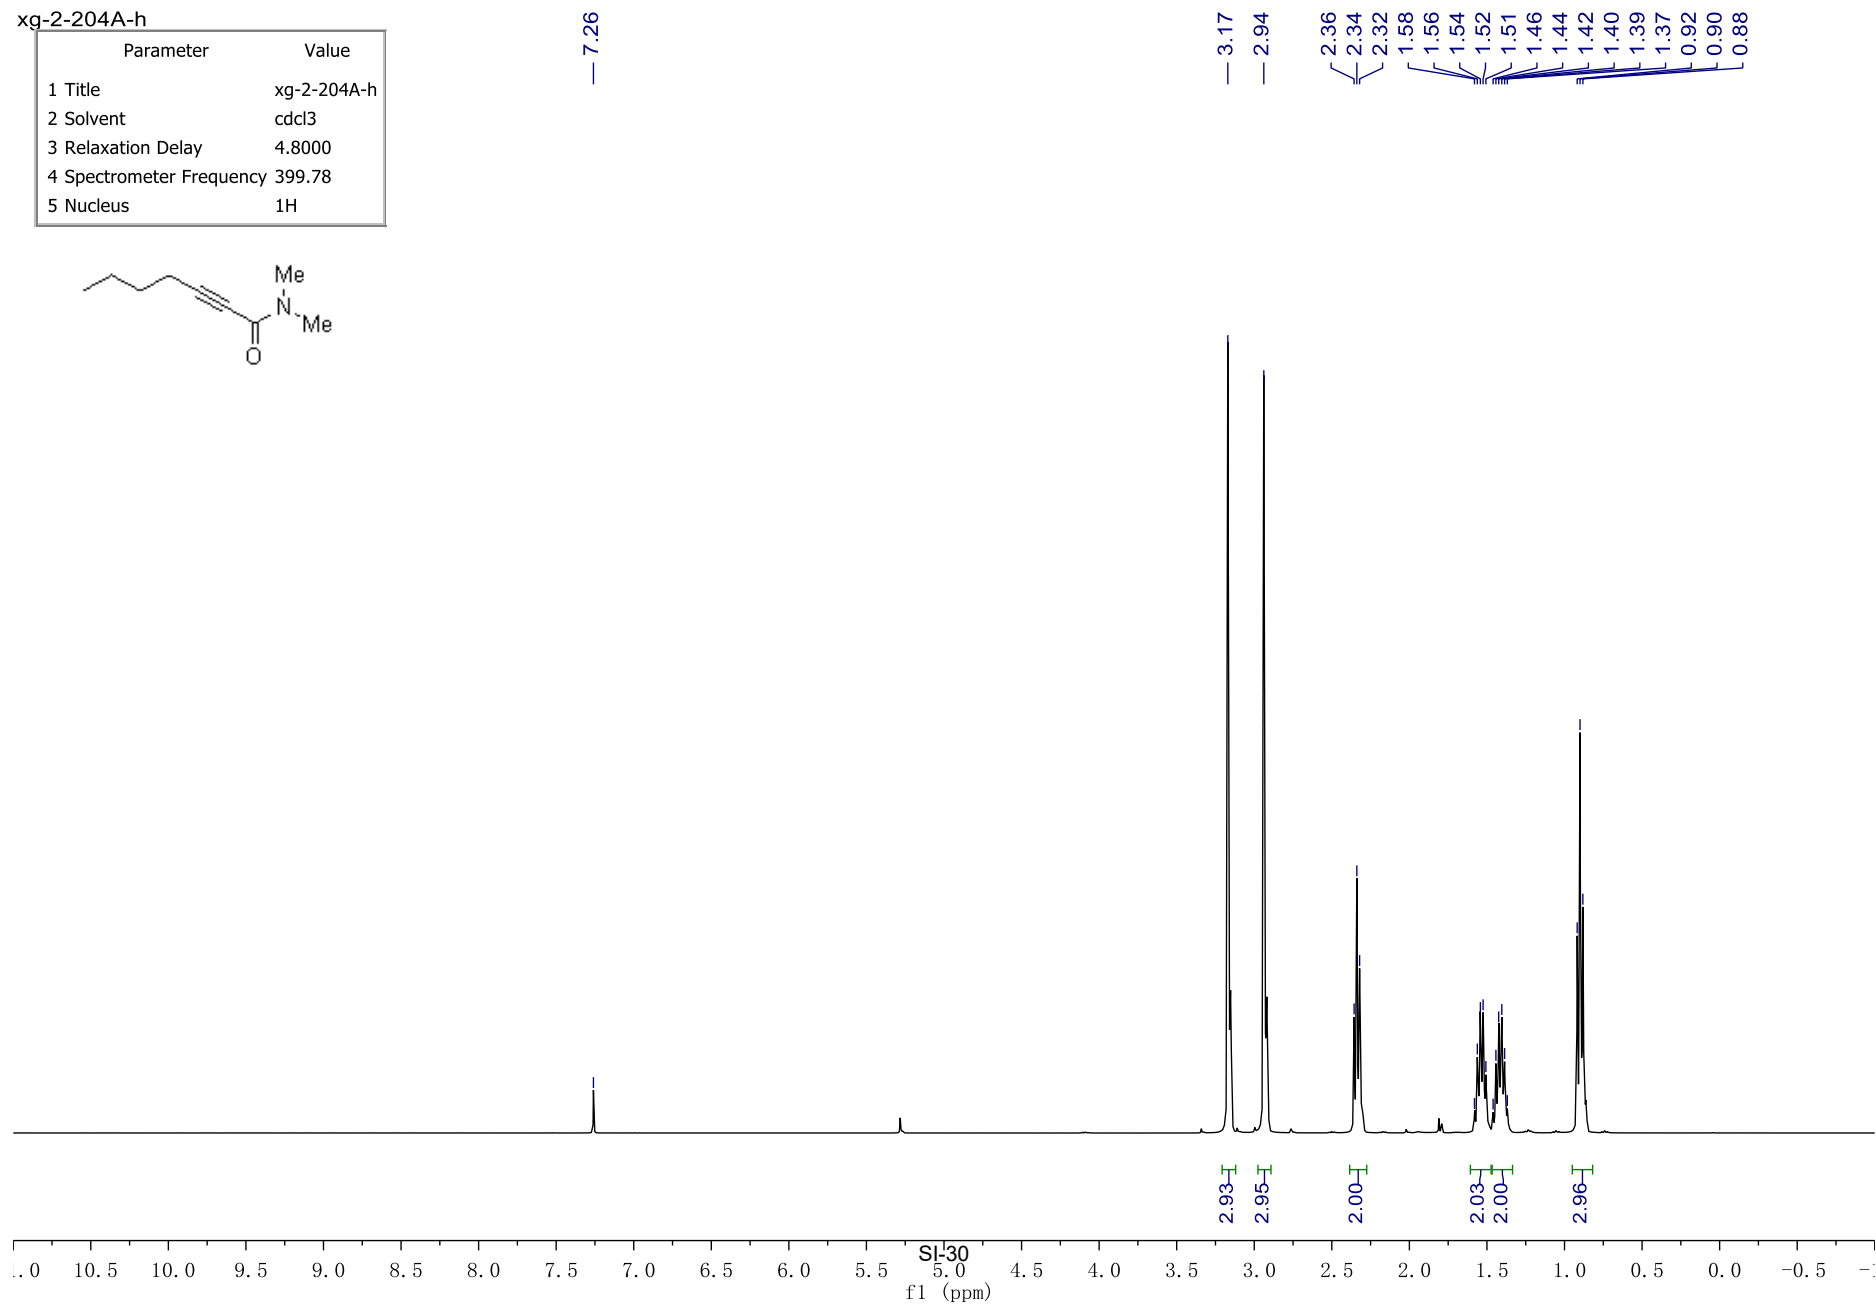

xg-2-204A-c13

| Parameter                | Value         |
|--------------------------|---------------|
| 1 Title                  | xg-2-204A-c13 |
| 2 Solvent                | cdcl3         |
| 3 Relaxation Delay       | 1.0000        |
| 4 Spectrometer Frequency | 100.53        |
| 5 Nucleus                | 13C           |

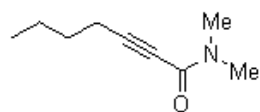

— 154.92

— 93.19

77.48  
77.16  
76.84  
74.13

38.43  
34.11  
29.95

22.09  
18.70  
13.60

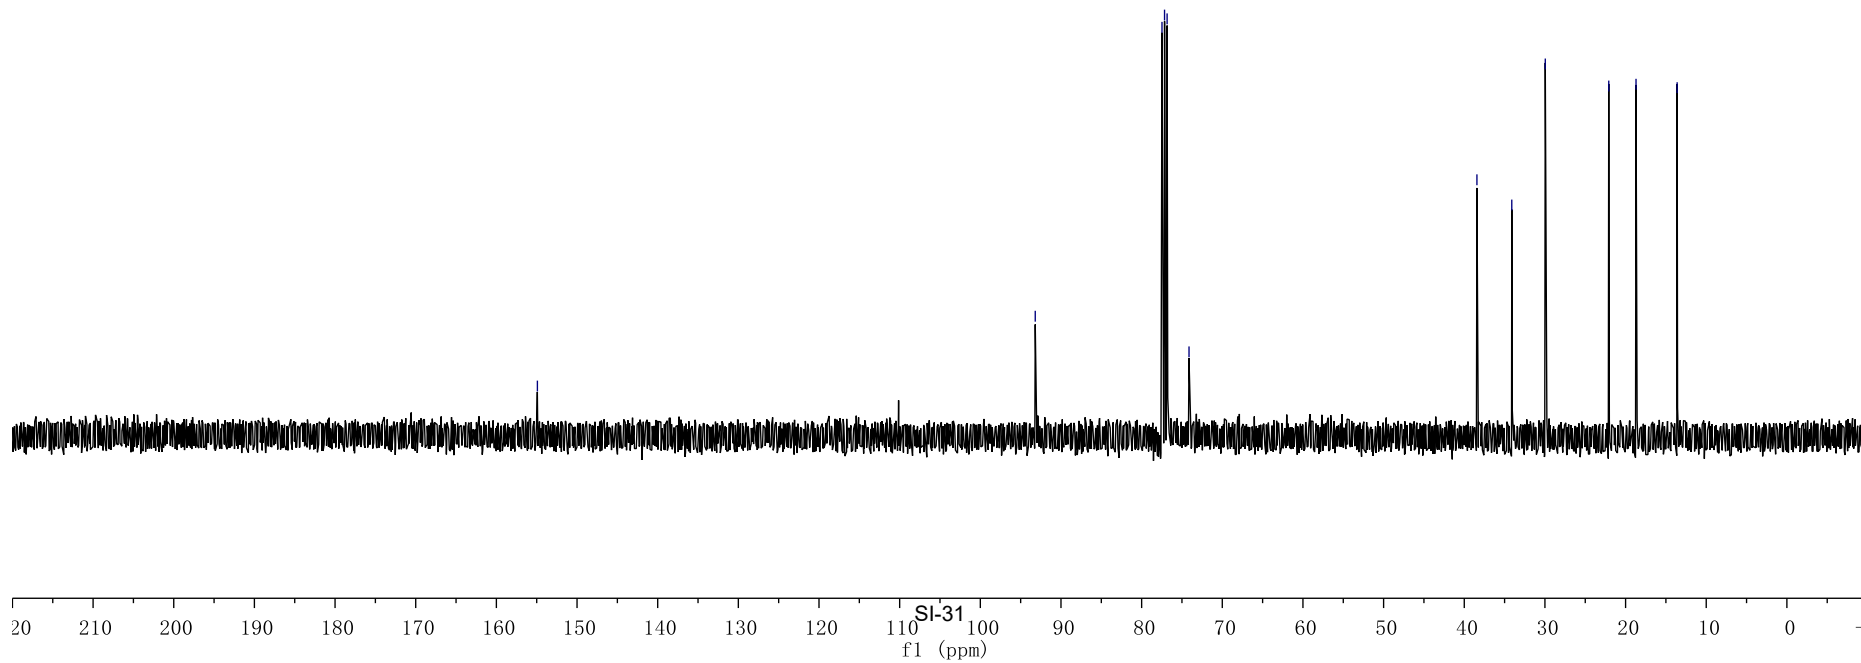

xg-2-192B-h

| Parameter                | Value       |
|--------------------------|-------------|
| 1 Title                  | xg-2-192B-h |
| 2 Solvent                | cdcl3       |
| 3 Relaxation Delay       | 4.8000      |
| 4 Spectrometer Frequency | 399.78      |
| 5 Nucleus                | 1H          |

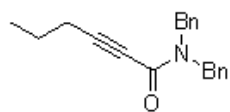

7.39  
7.39  
7.38  
7.37  
7.37  
7.35  
7.35  
7.26  
7.22  
7.22  
7.20

4.67  
4.50

2.36  
2.34  
2.32  
1.63  
1.61  
1.59  
1.58  
1.57  
1.55  
1.54  
0.98  
0.96  
0.94

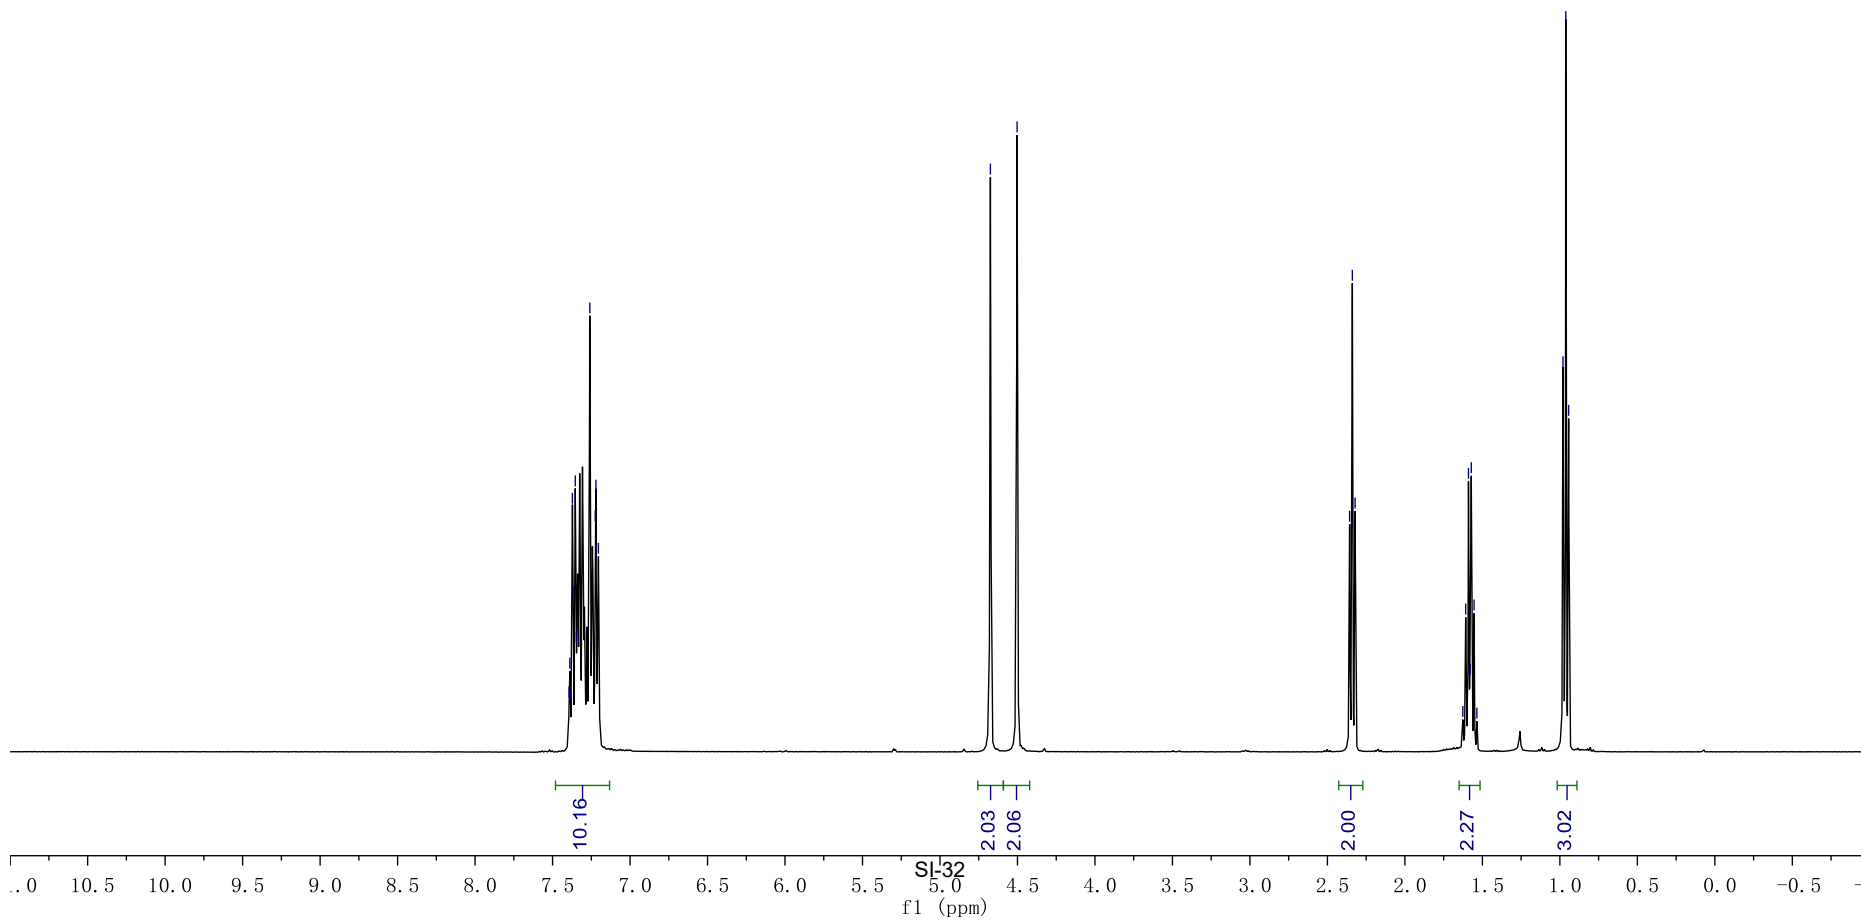



xg-2-192B-c13

| Parameter                | Value         |
|--------------------------|---------------|
| 1 Title                  | xg-2-192B-c13 |
| 2 Solvent                | cdcl3         |
| 3 Relaxation Delay       | 1.0000        |
| 4 Spectrometer Frequency | 100.53        |
| 5 Nucleus                | 13C           |

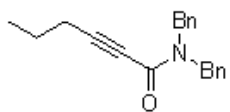

— 155.31

136.54  
136.39  
128.94  
128.78  
128.58  
127.99  
127.81  
127.70

— 93.90

77.48  
77.16  
76.84  
74.34

— 51.45

— 46.29

21.44  
21.11

— 13.67

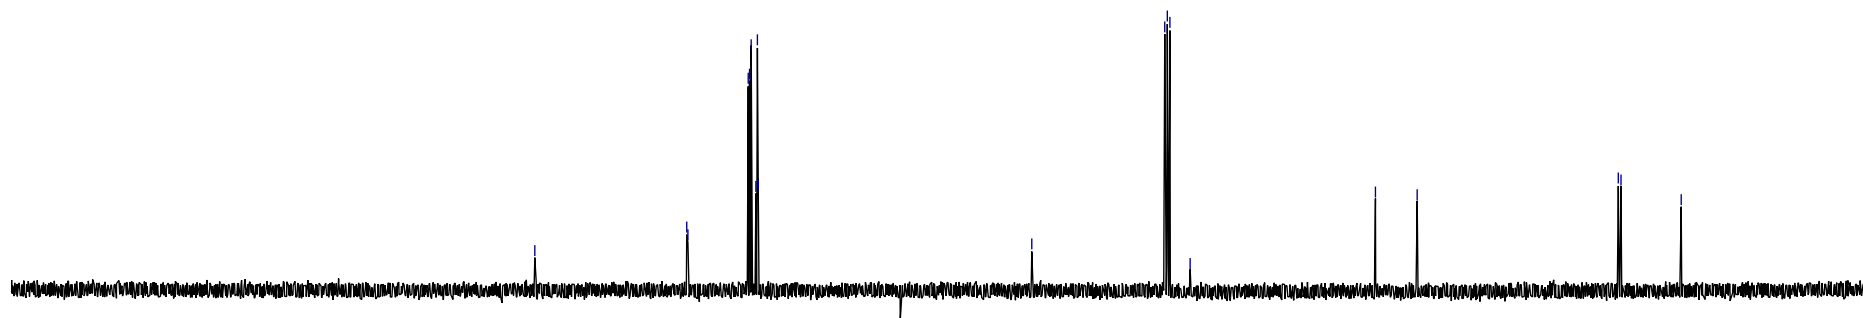

20 210 200 190 180 170 160 150 140 130 120 110 100 90 80 70 60 50 40 30 20 10 0 -  
SI-33  
f1 (ppm)

xg-2-200C

| Parameter                | Value     |
|--------------------------|-----------|
| 1 Title                  | xg-2-200C |
| 2 Solvent                | CDCl3     |
| 3 Relaxation Delay       | 4.8000    |
| 4 Spectrometer Frequency | 499.86    |
| 5 Nucleus                | 1H        |

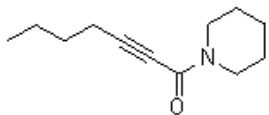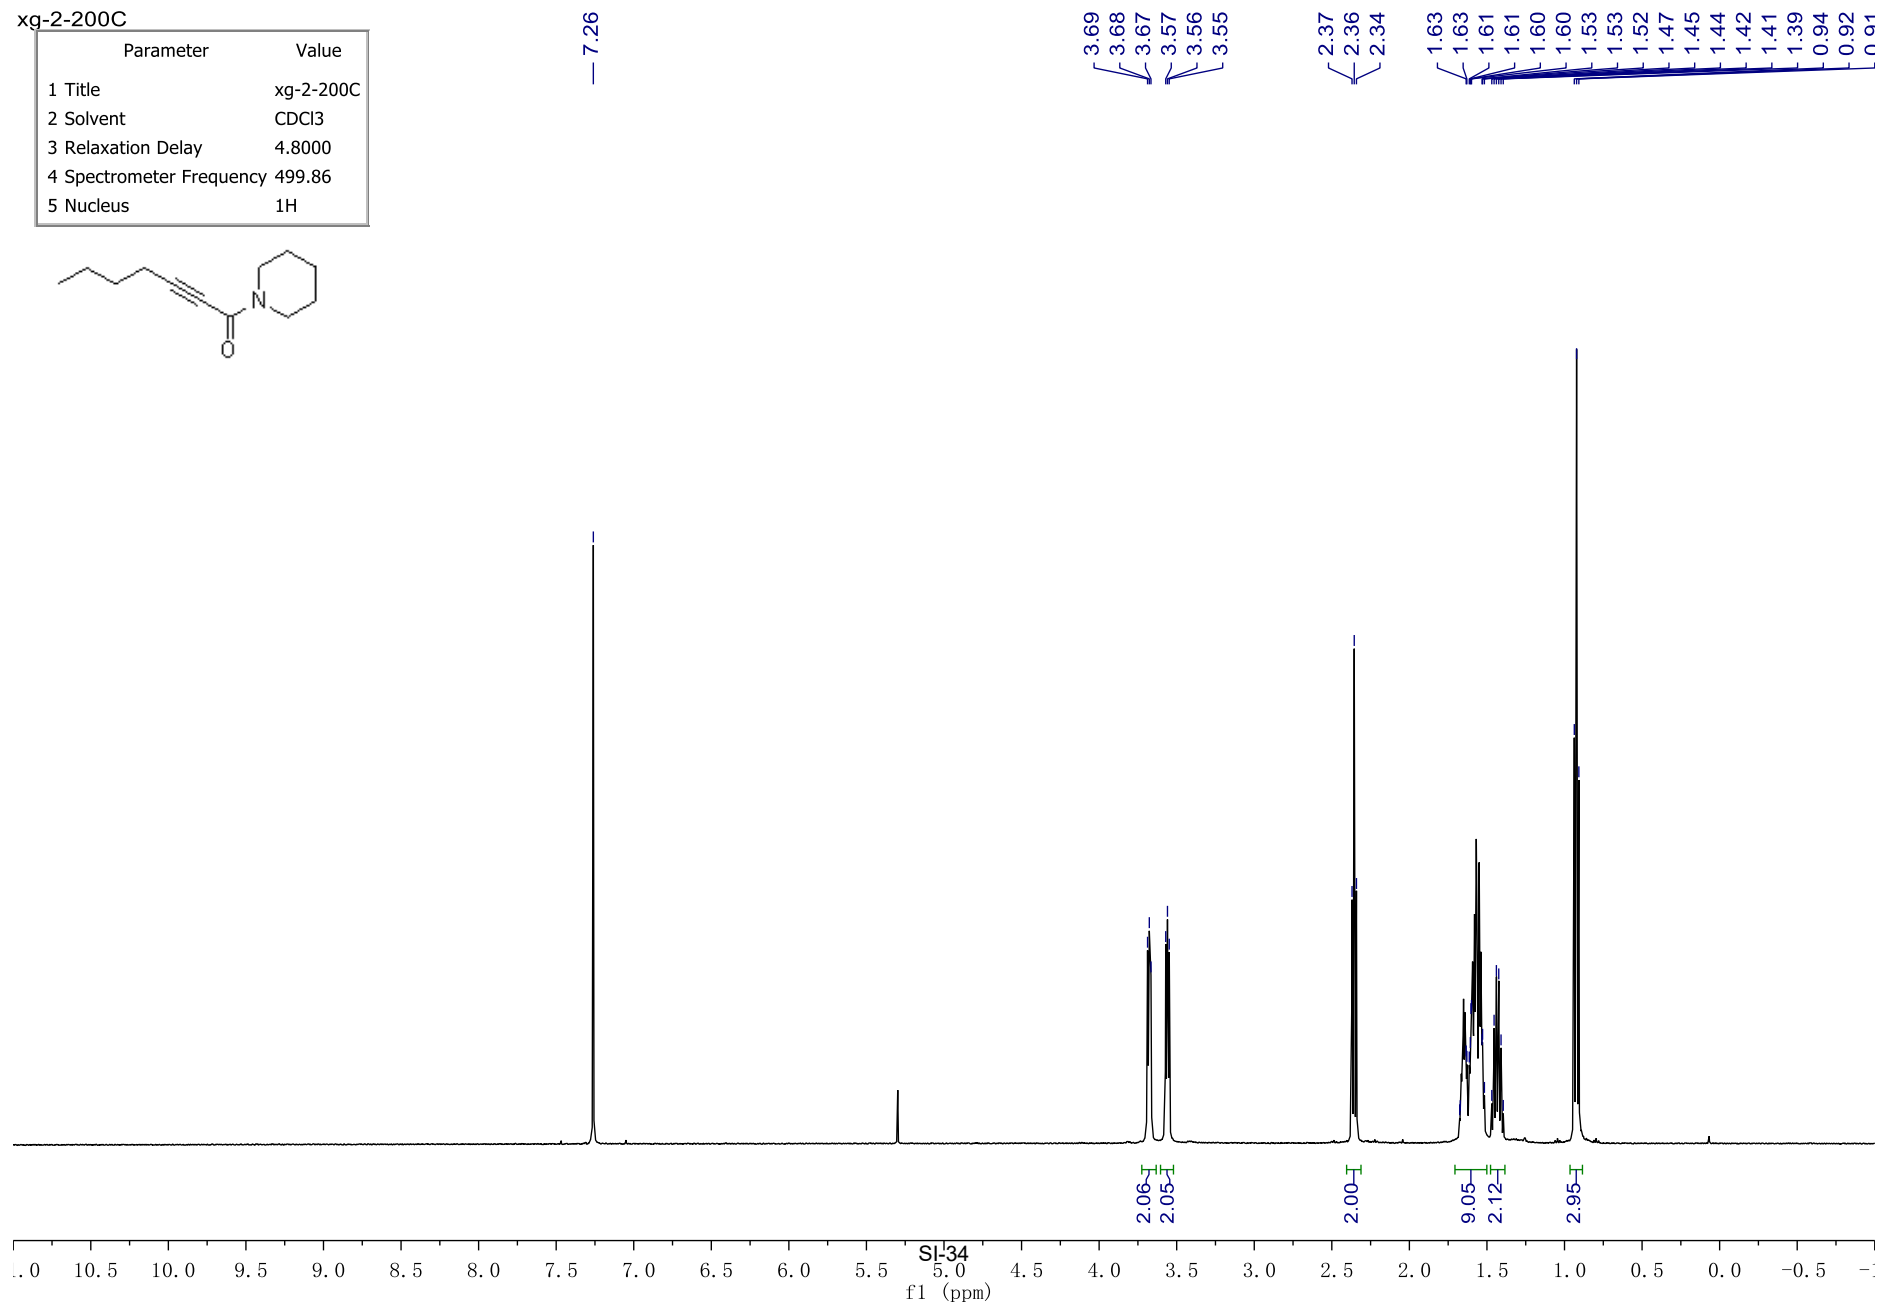

xg-2-200C-c13

| Parameter                | Value         |
|--------------------------|---------------|
| 1 Title                  | xg-2-200C-c13 |
| 2 Solvent                | cdcl3         |
| 3 Relaxation Delay       | 1.0000        |
| 4 Spectrometer Frequency | 100.53        |
| 5 Nucleus                | 13C           |

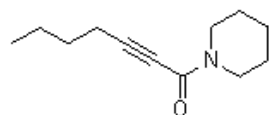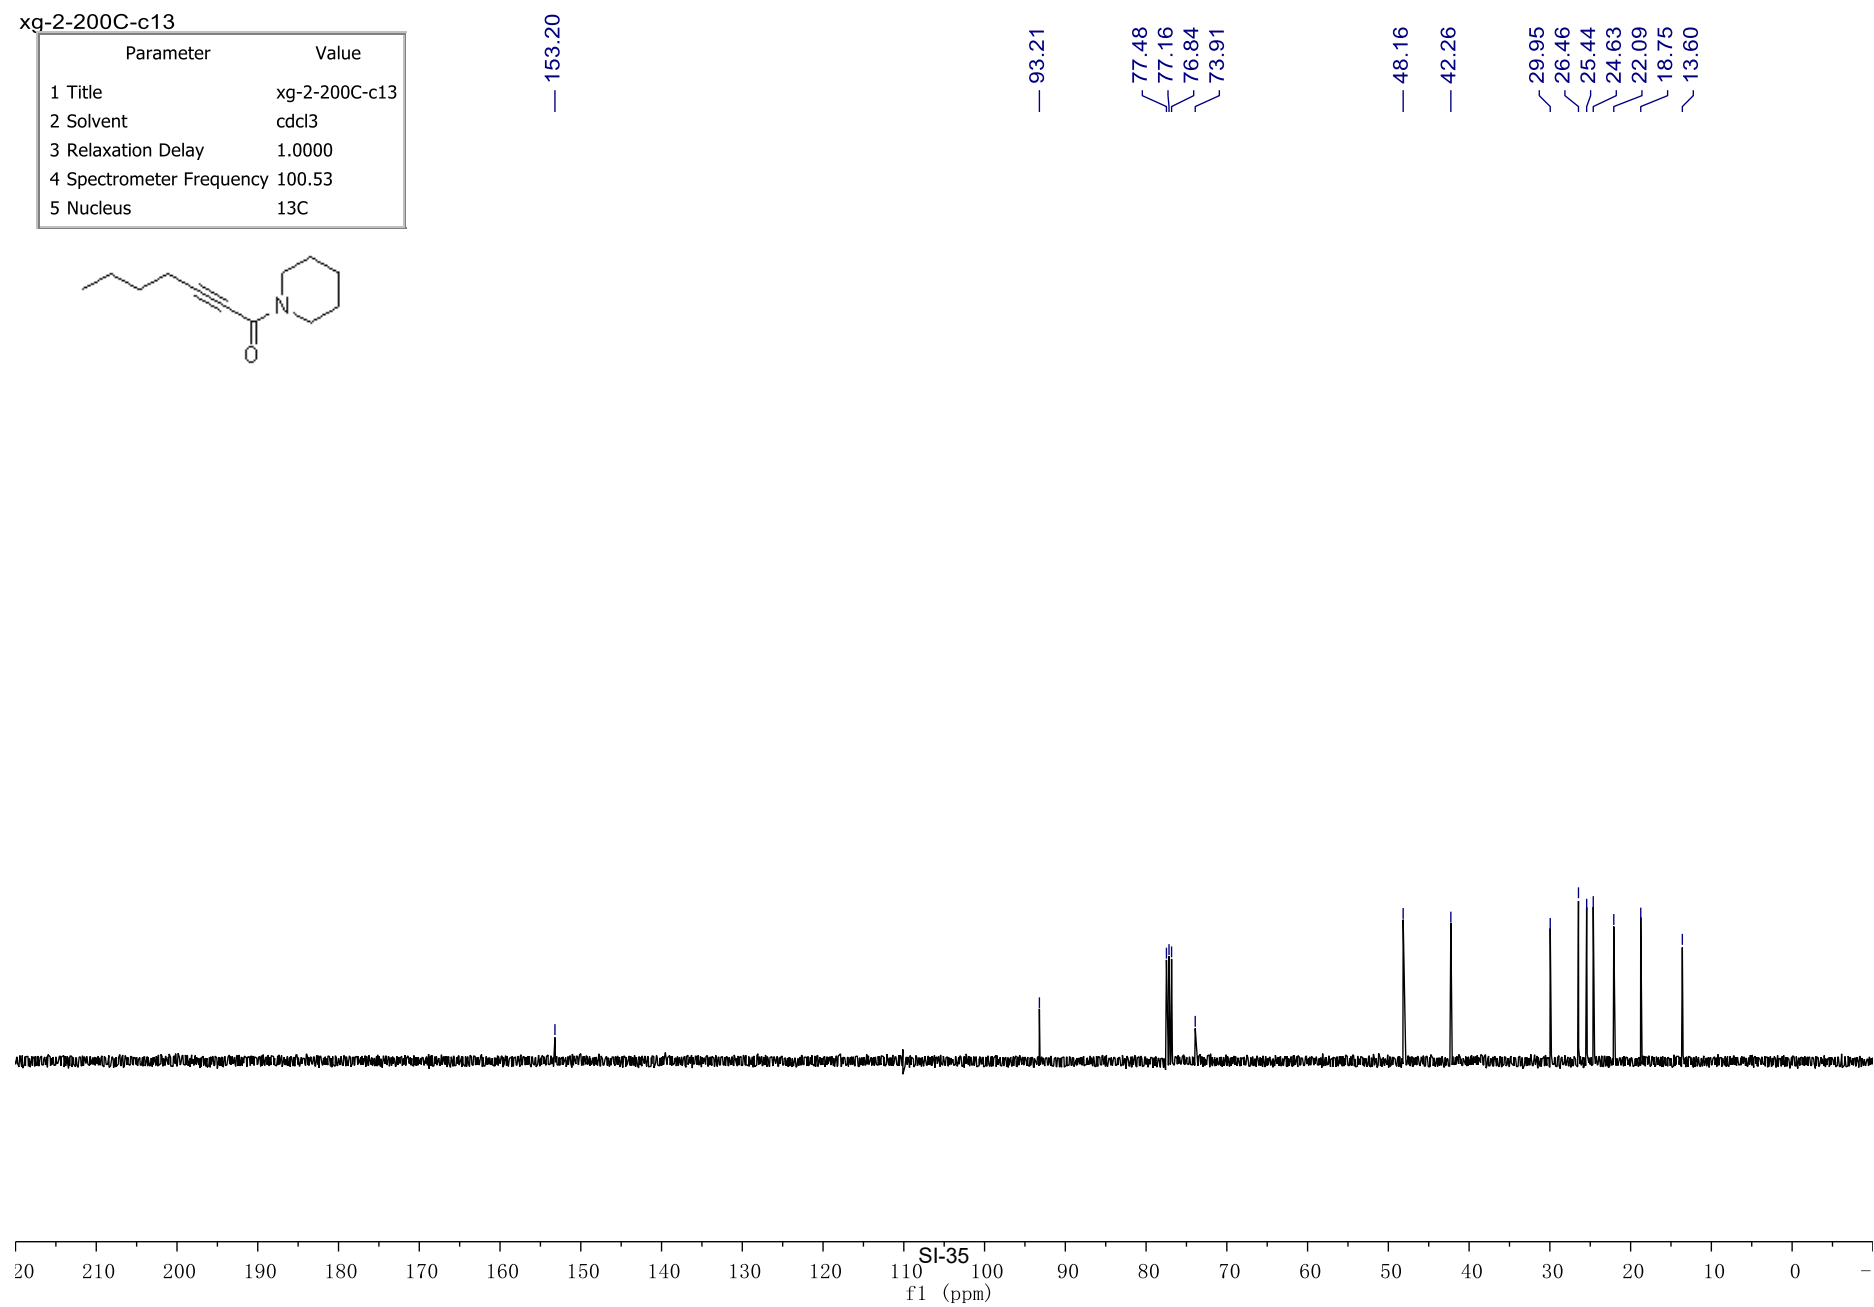

xg-2-200B

| Parameter                | Value     |
|--------------------------|-----------|
| 1 Title                  | xg-2-200B |
| 2 Solvent                | CDCl3     |
| 3 Relaxation Delay       | 4.8000    |
| 4 Spectrometer Frequency | 499.86    |
| 5 Nucleus                | 1H        |

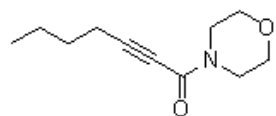

— 7.26

3.75  
3.74  
3.73  
3.71  
3.70  
3.69  
3.67  
3.66  
3.65  
3.65  
3.64  
3.64  
2.38  
2.36  
2.35  
1.60  
1.58  
1.57  
1.55  
1.54  
1.46  
1.45  
1.44  
1.43  
1.42  
1.42  
1.40  
1.39  
0.94  
0.92  
0.91

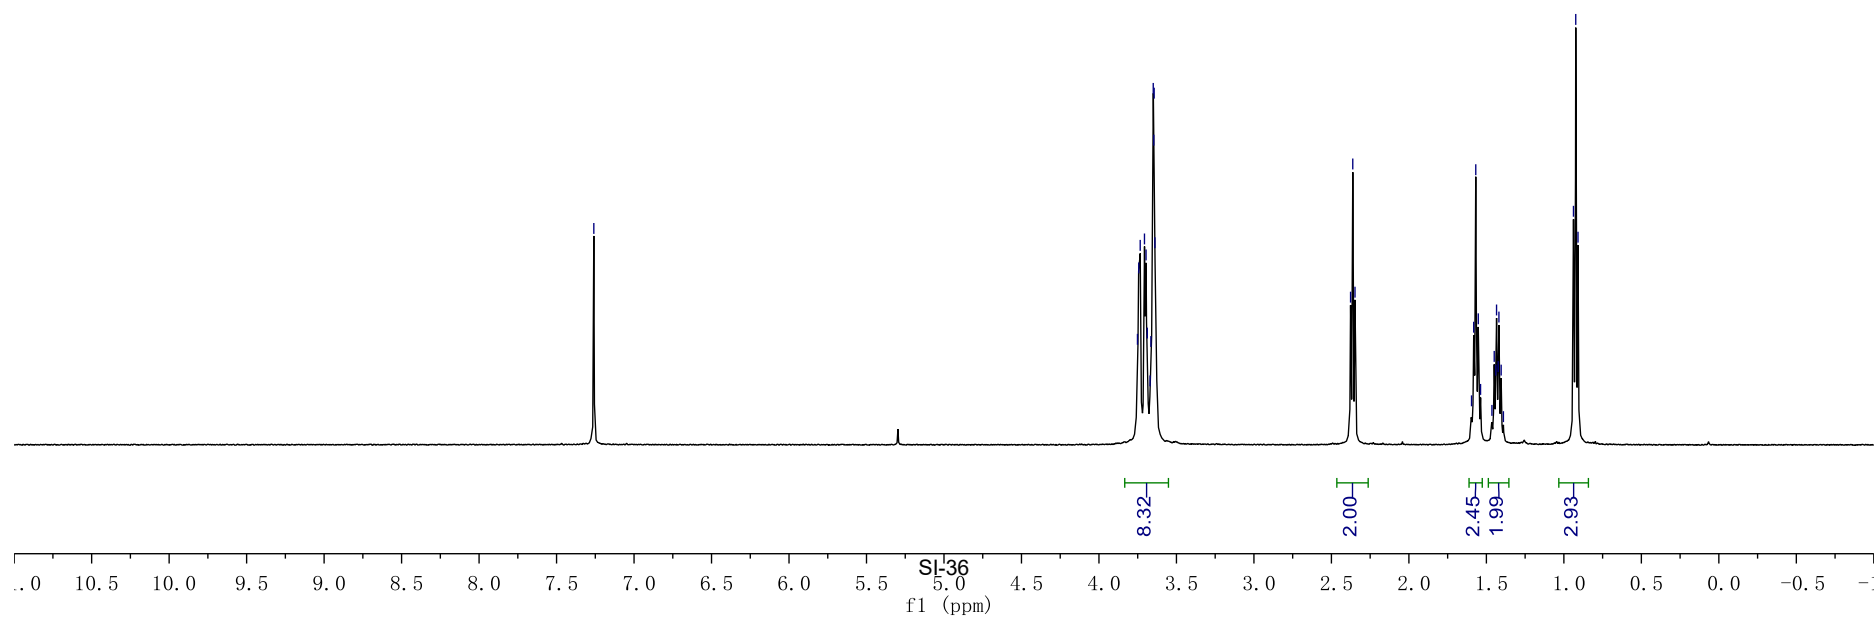

xg-2-200B-c13

| Parameter                | Value         |
|--------------------------|---------------|
| 1 Title                  | xg-2-200B-c13 |
| 2 Solvent                | cdcl3         |
| 3 Relaxation Delay       | 1.0000        |
| 4 Spectrometer Frequency | 100.53        |
| 5 Nucleus                | 13C           |

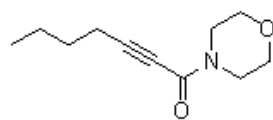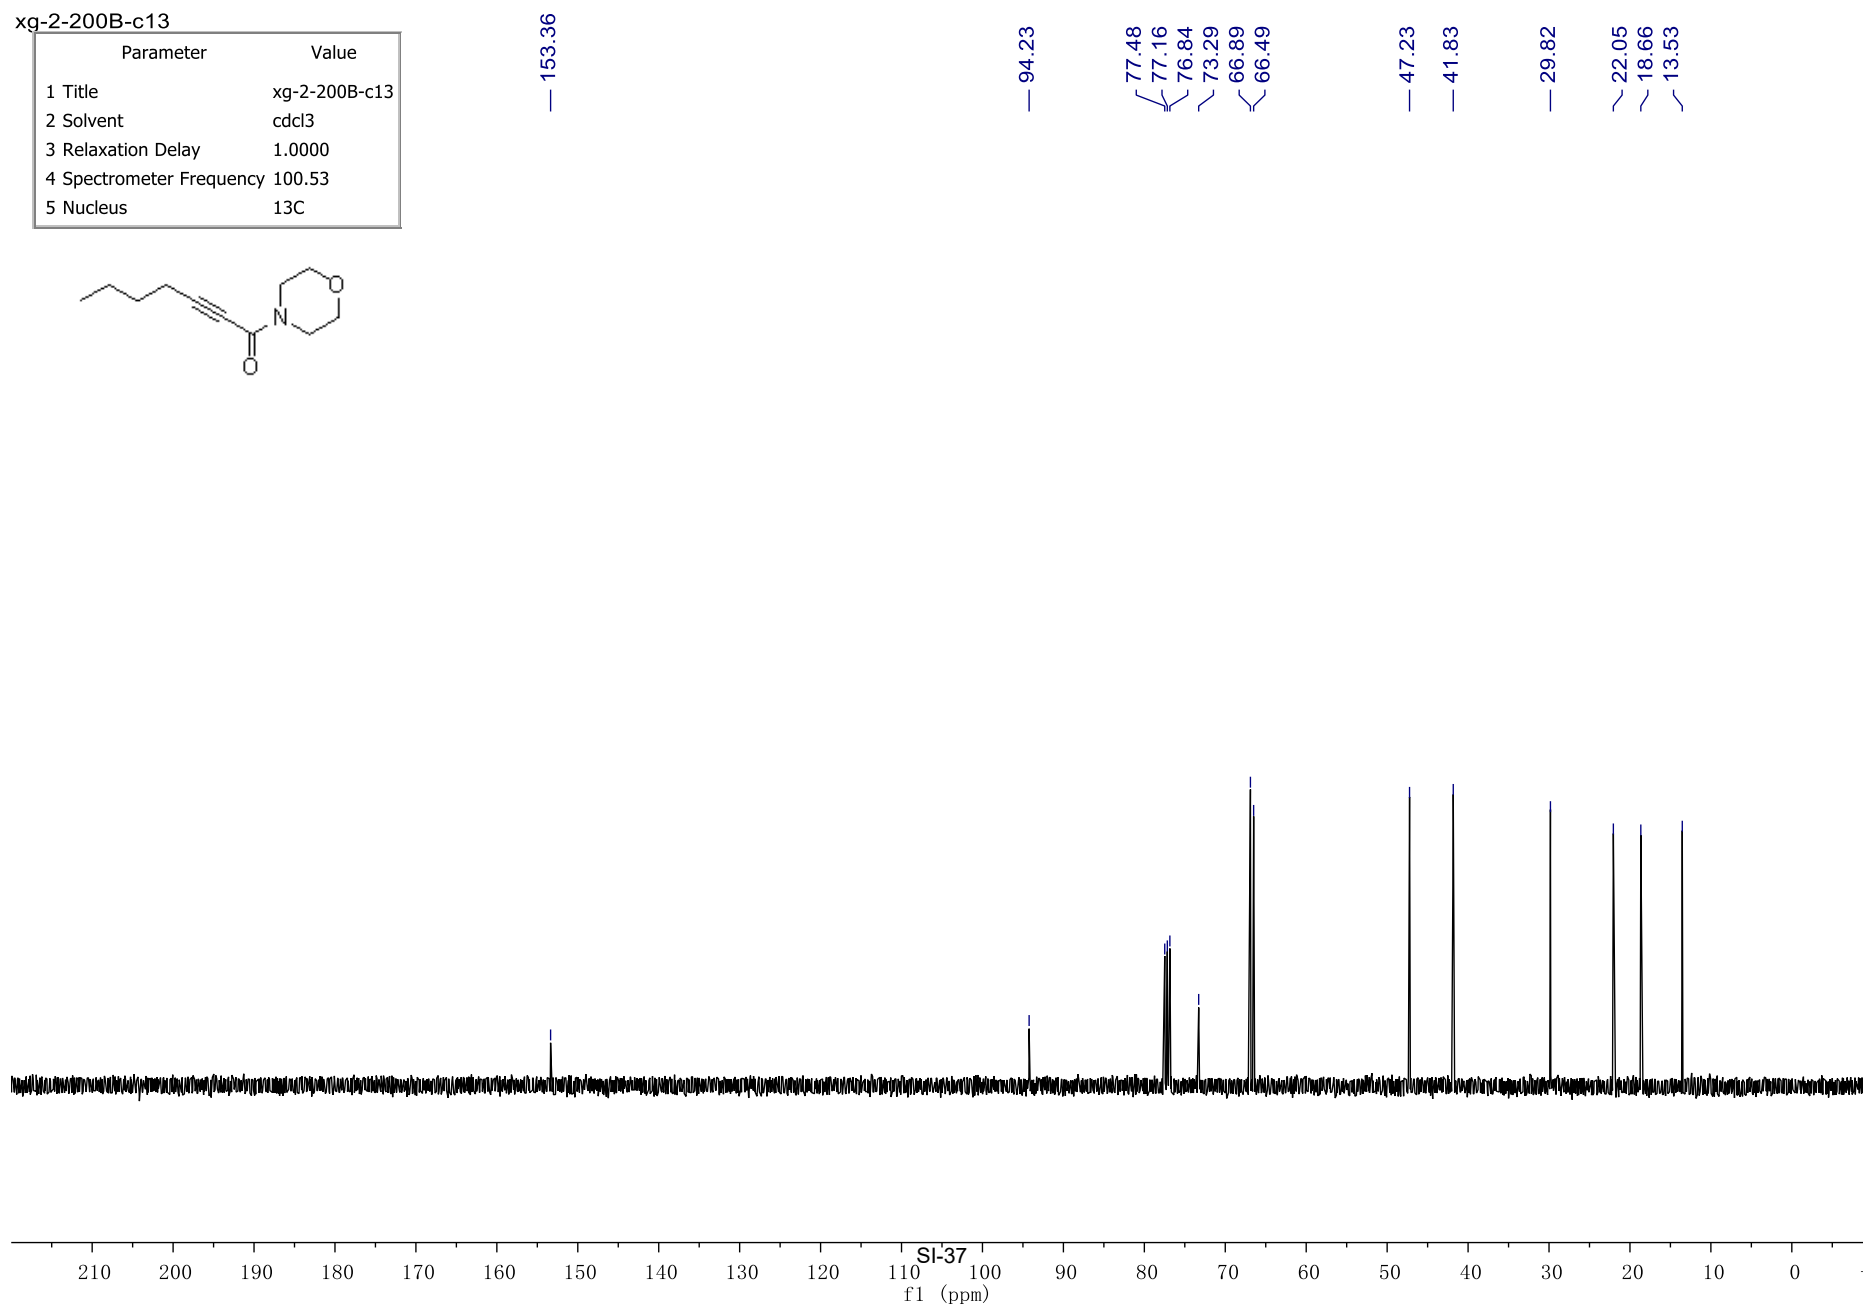

mx5h-xg-1f

| Parameters             |            |
|------------------------|------------|
| Parameter              | Value      |
| Title                  | mx5h-xg-1f |
| Solvent                | cdcl3      |
| Spectrometer Frequency | 599.64     |
| Nucleus                | 1H         |

7.39  
7.38  
7.37  
7.37  
7.36  
7.36  
7.32  
7.32  
7.31  
7.31  
7.30  
7.27  
7.26  
7.26  
7.25  
7.25

3.30

2.06  
2.05  
2.03  
1.29  
1.28  
1.26  
1.25  
1.24  
1.23  
0.69  
0.68  
0.67

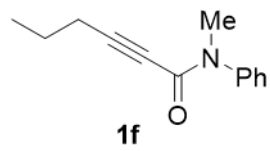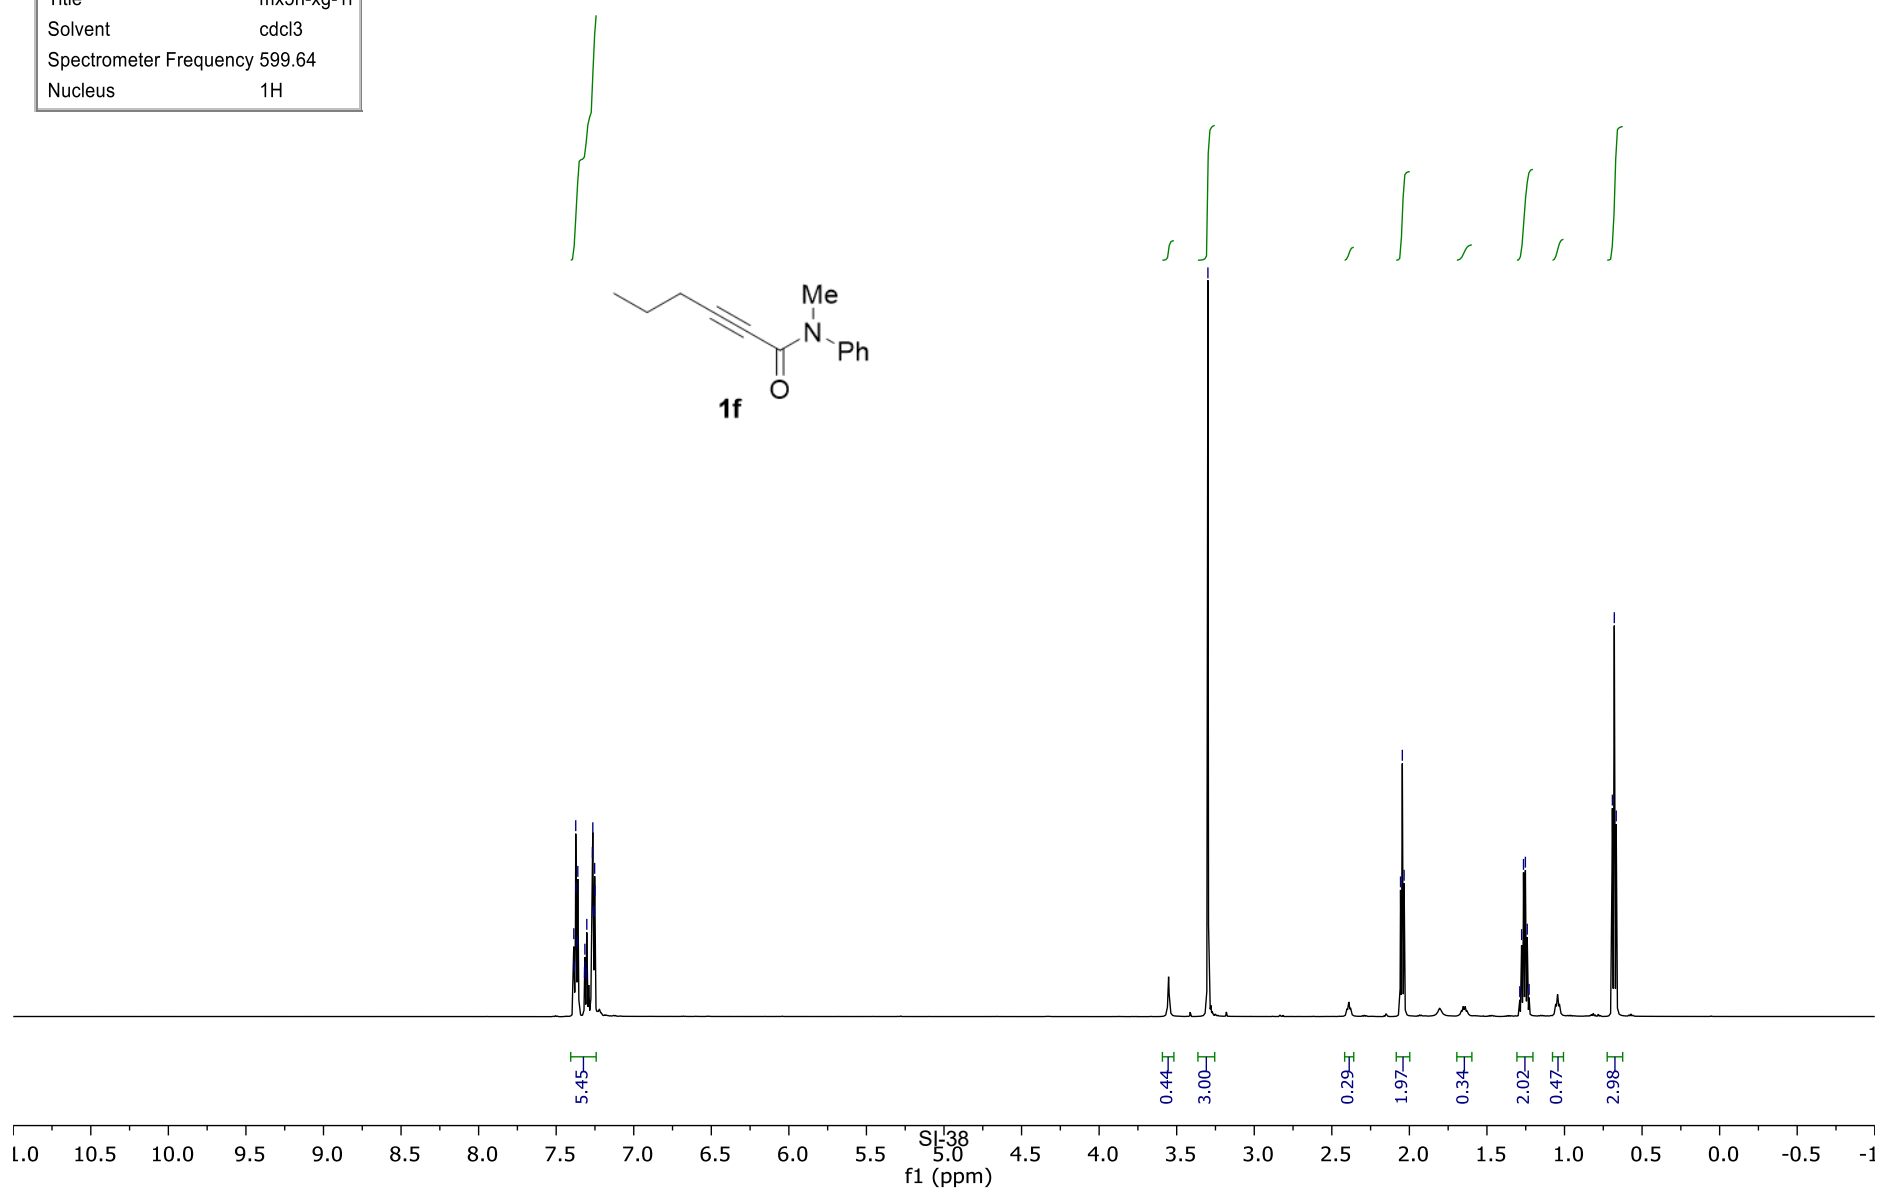

5.45

0.44  
3.00

0.29  
1.97  
0.34  
2.02  
0.47  
2.98

SI-38  
5.0  
f1 (ppm)

xg-2-195A-c13

| Parameter                | Value         |
|--------------------------|---------------|
| 1 Title                  | xg-2-195A-c13 |
| 2 Solvent                | cdcl3         |
| 3 Relaxation Delay       | 1.0000        |
| 4 Spectrometer Frequency | 100.53        |
| 5 Nucleus                | 13C           |

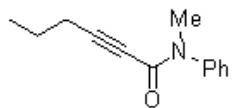

— 154.52

— 143.49

129.14

127.77

127.36

— 93.98

77.48

77.16

76.84

75.11

— 36.41

21.01

20.79

— 13.22

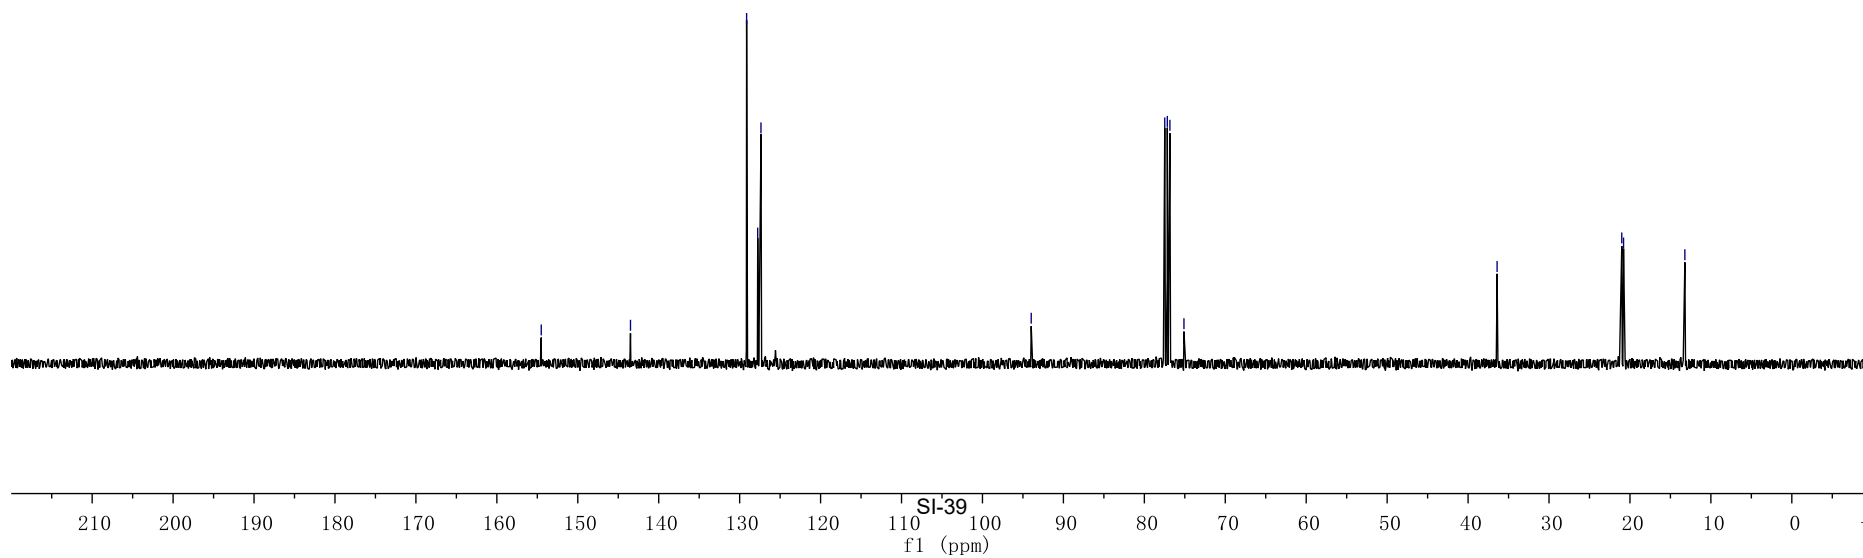

xg-2-194B

| Parameter                | Value     |
|--------------------------|-----------|
| 1 Title                  | xg-2-194B |
| 2 Solvent                | CDCl3     |
| 3 Relaxation Delay       | 4.8000    |
| 4 Spectrometer Frequency | 499.86    |
| 5 Nucleus                | 1H        |

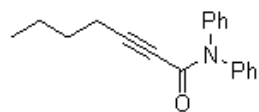

7.38  
7.34  
7.30  
7.19

2.15  
2.14  
2.13  
1.27  
1.26  
1.25  
1.24  
1.23  
1.23  
1.22  
1.21  
1.12  
1.11  
1.10  
1.09  
1.07  
1.07  
0.79  
0.77  
0.76

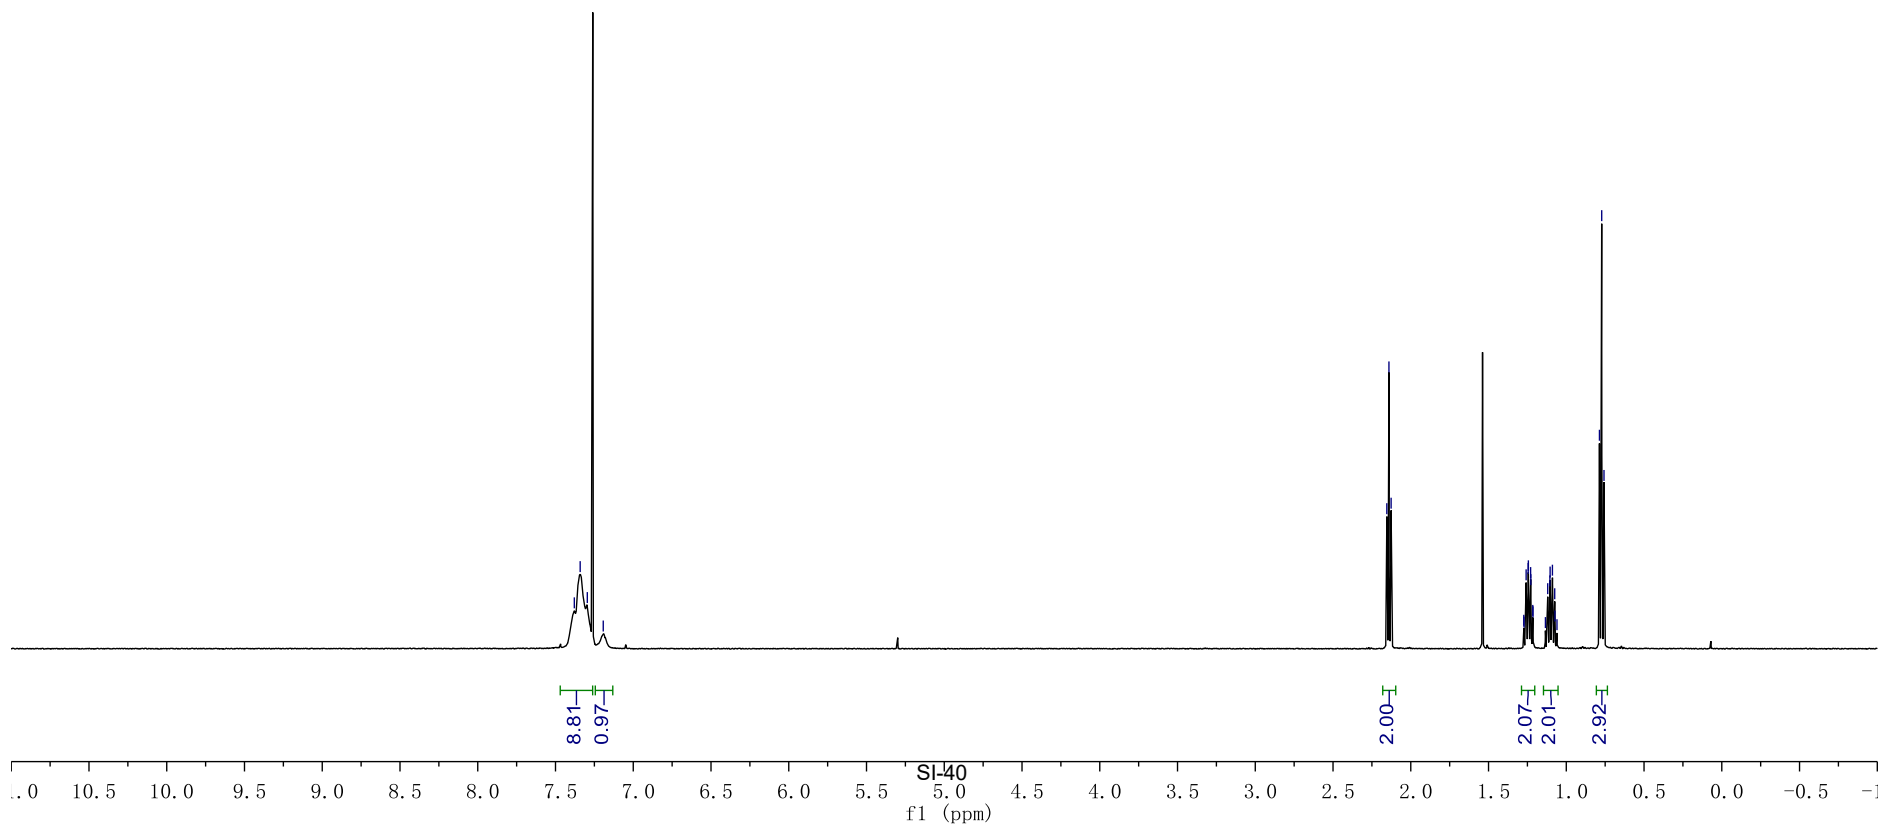



xg-2-194B-c13

| Parameter                | Value         |
|--------------------------|---------------|
| 1 Title                  | xg-2-194B-c13 |
| 2 Solvent                | cdcl3         |
| 3 Relaxation Delay       | 1.0000        |
| 4 Spectrometer Frequency | 100.53        |
| 5 Nucleus                | 13C           |

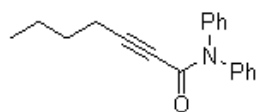

153.91  
142.61 141.47  
129.09 129.02 127.93 126.42 126.02  
95.74  
77.48 77.16 76.84 75.72  
29.43 21.61 18.64 13.55

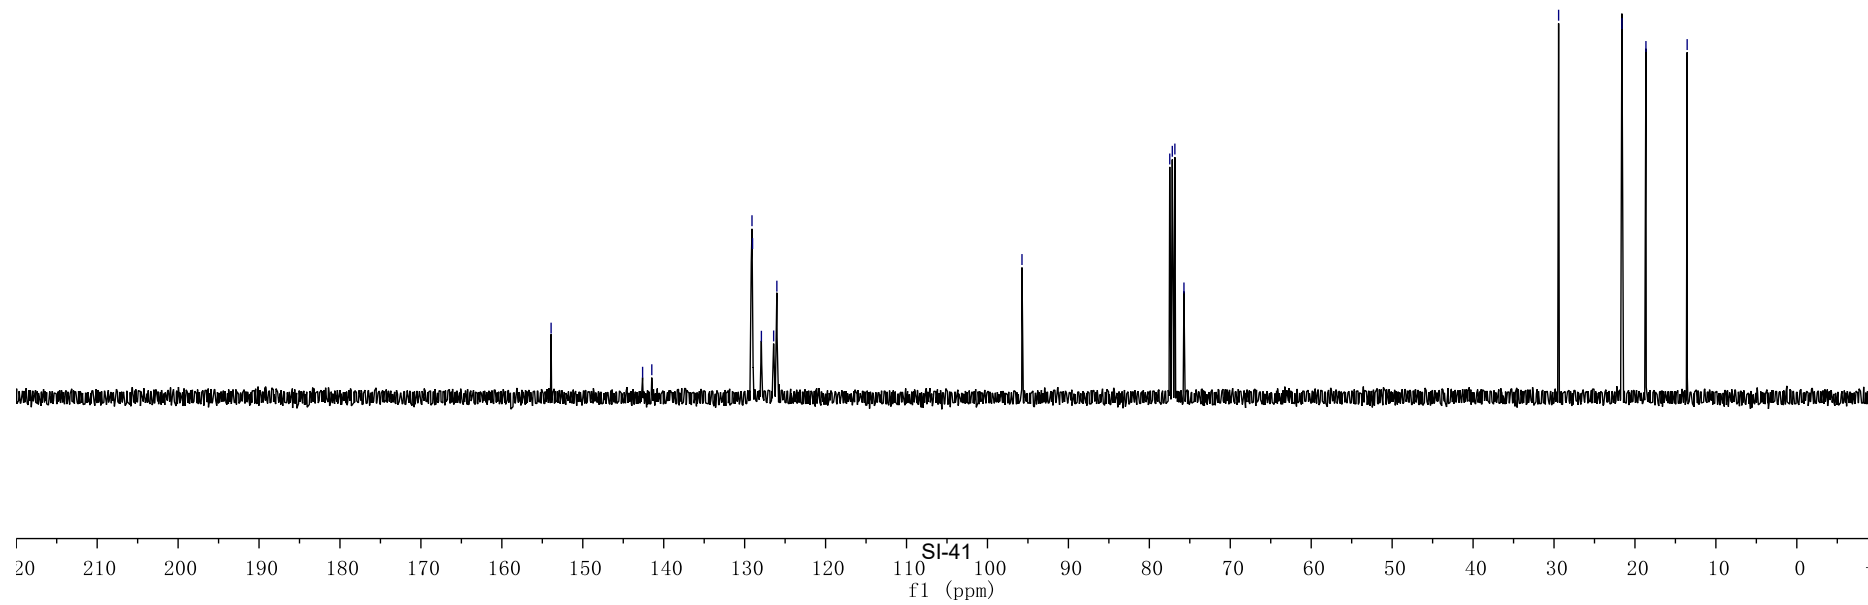



xg-2-224A-c13

| Parameter                | Value         |
|--------------------------|---------------|
| 1 Title                  | xg-2-224A-c13 |
| 2 Solvent                | CDCl3         |
| 3 Relaxation Delay       | 1.0000        |
| 4 Spectrometer Frequency | 125.70        |
| 5 Nucleus                | 13C           |

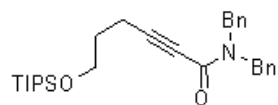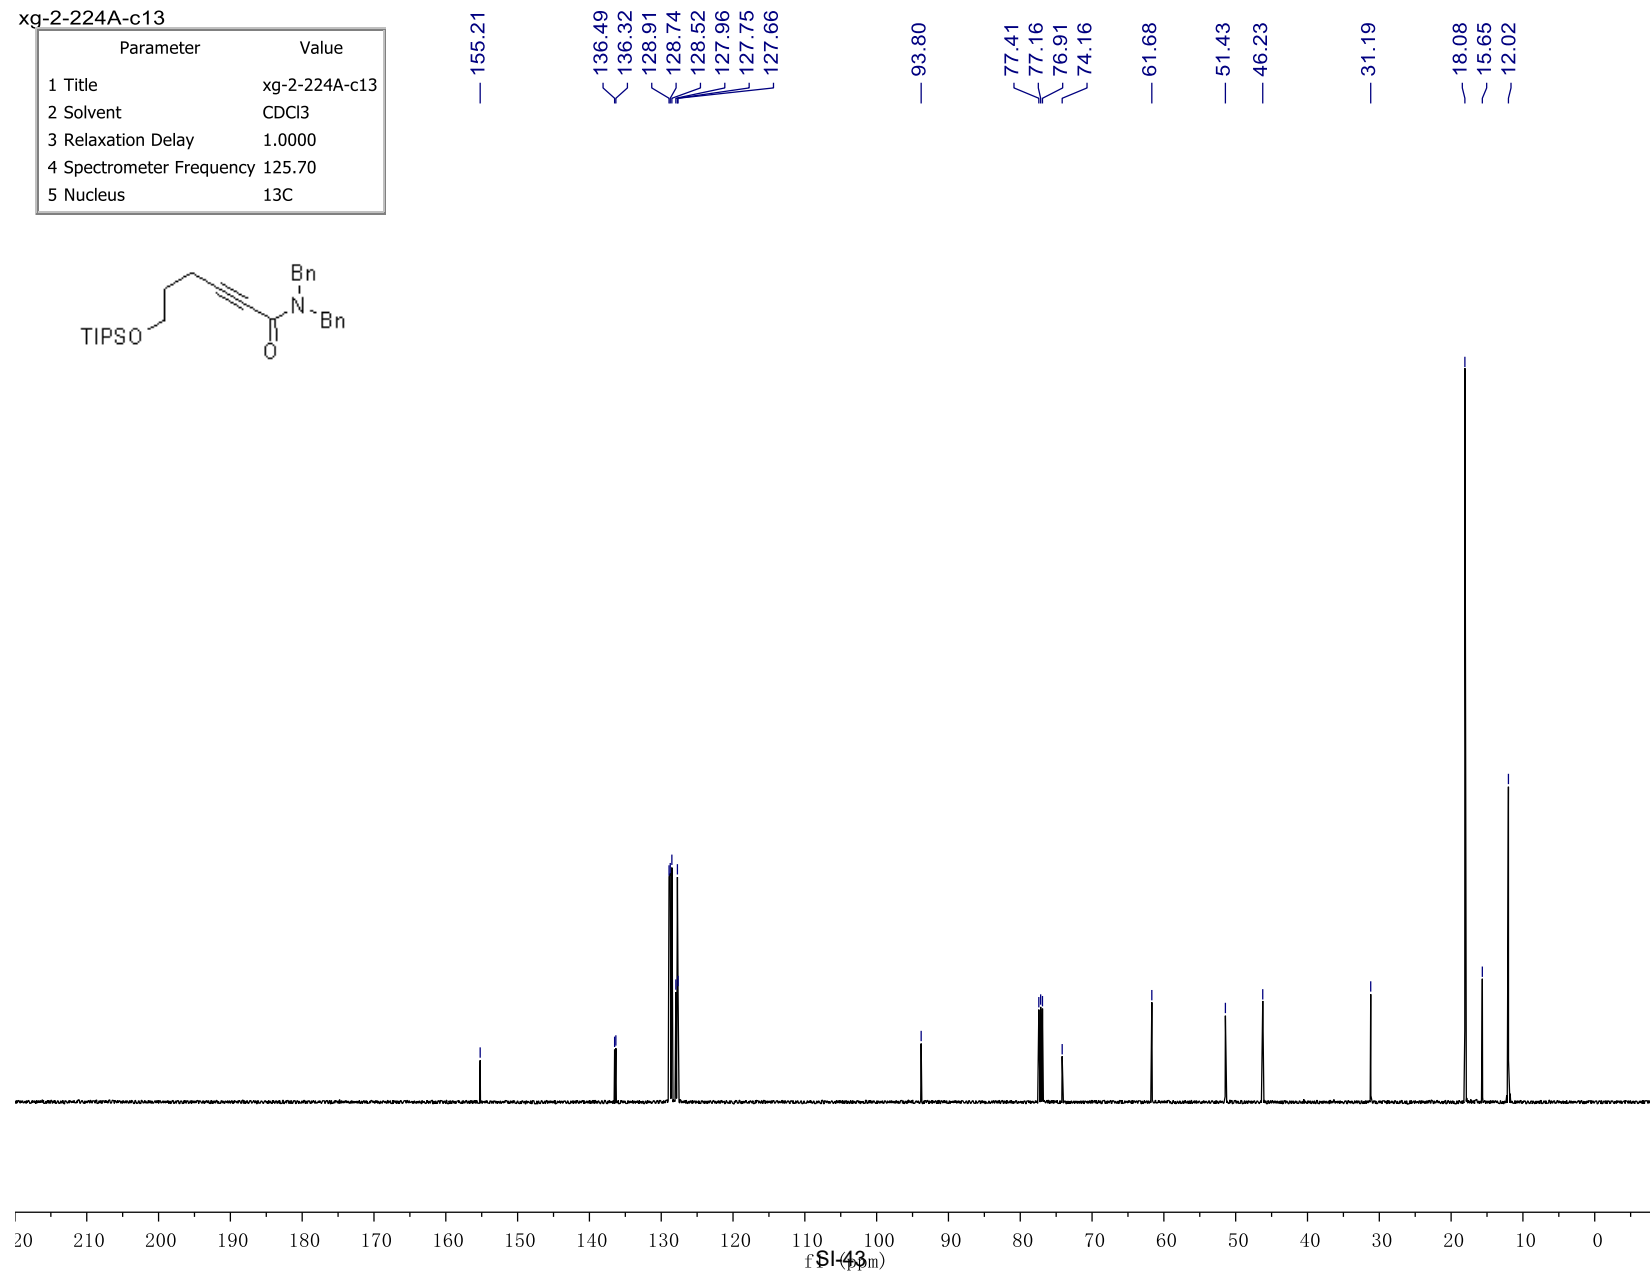

xg-3-34B-h

| Parameter                | Value      |
|--------------------------|------------|
| 1 Title                  | xg-3-34B-h |
| 2 Solvent                | cdcl3      |
| 3 Relaxation Delay       | 4.8000     |
| 4 Spectrometer Frequency | 399.78     |
| 5 Nucleus                | 1H         |

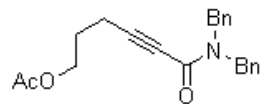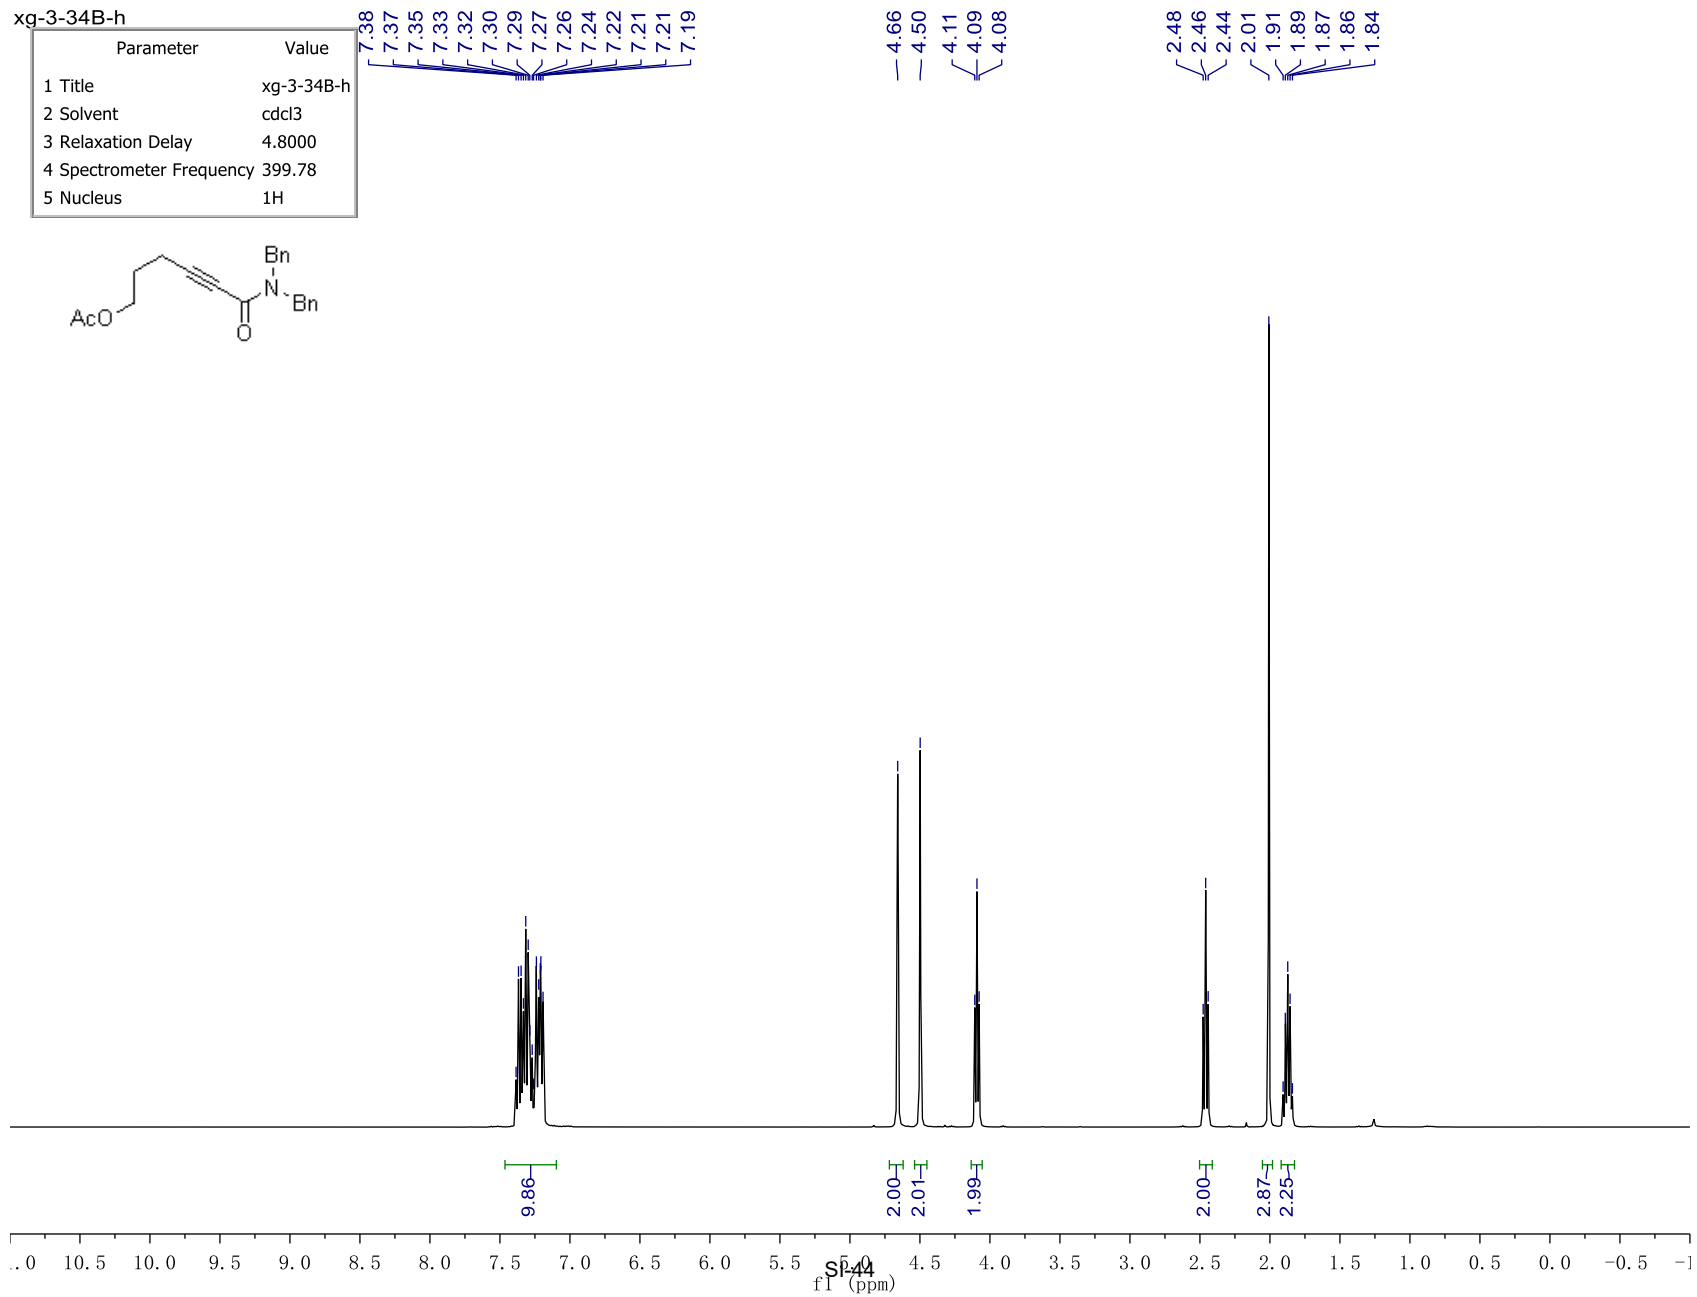

xg-3-34B-c13

| Parameter                | Value        |
|--------------------------|--------------|
| 1 Title                  | xg-3-34B-c13 |
| 2 Solvent                | cdcl3        |
| 3 Relaxation Delay       | 1.0000       |
| 4 Spectrometer Frequency | 100.53       |
| 5 Nucleus                | 13C          |

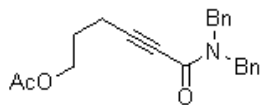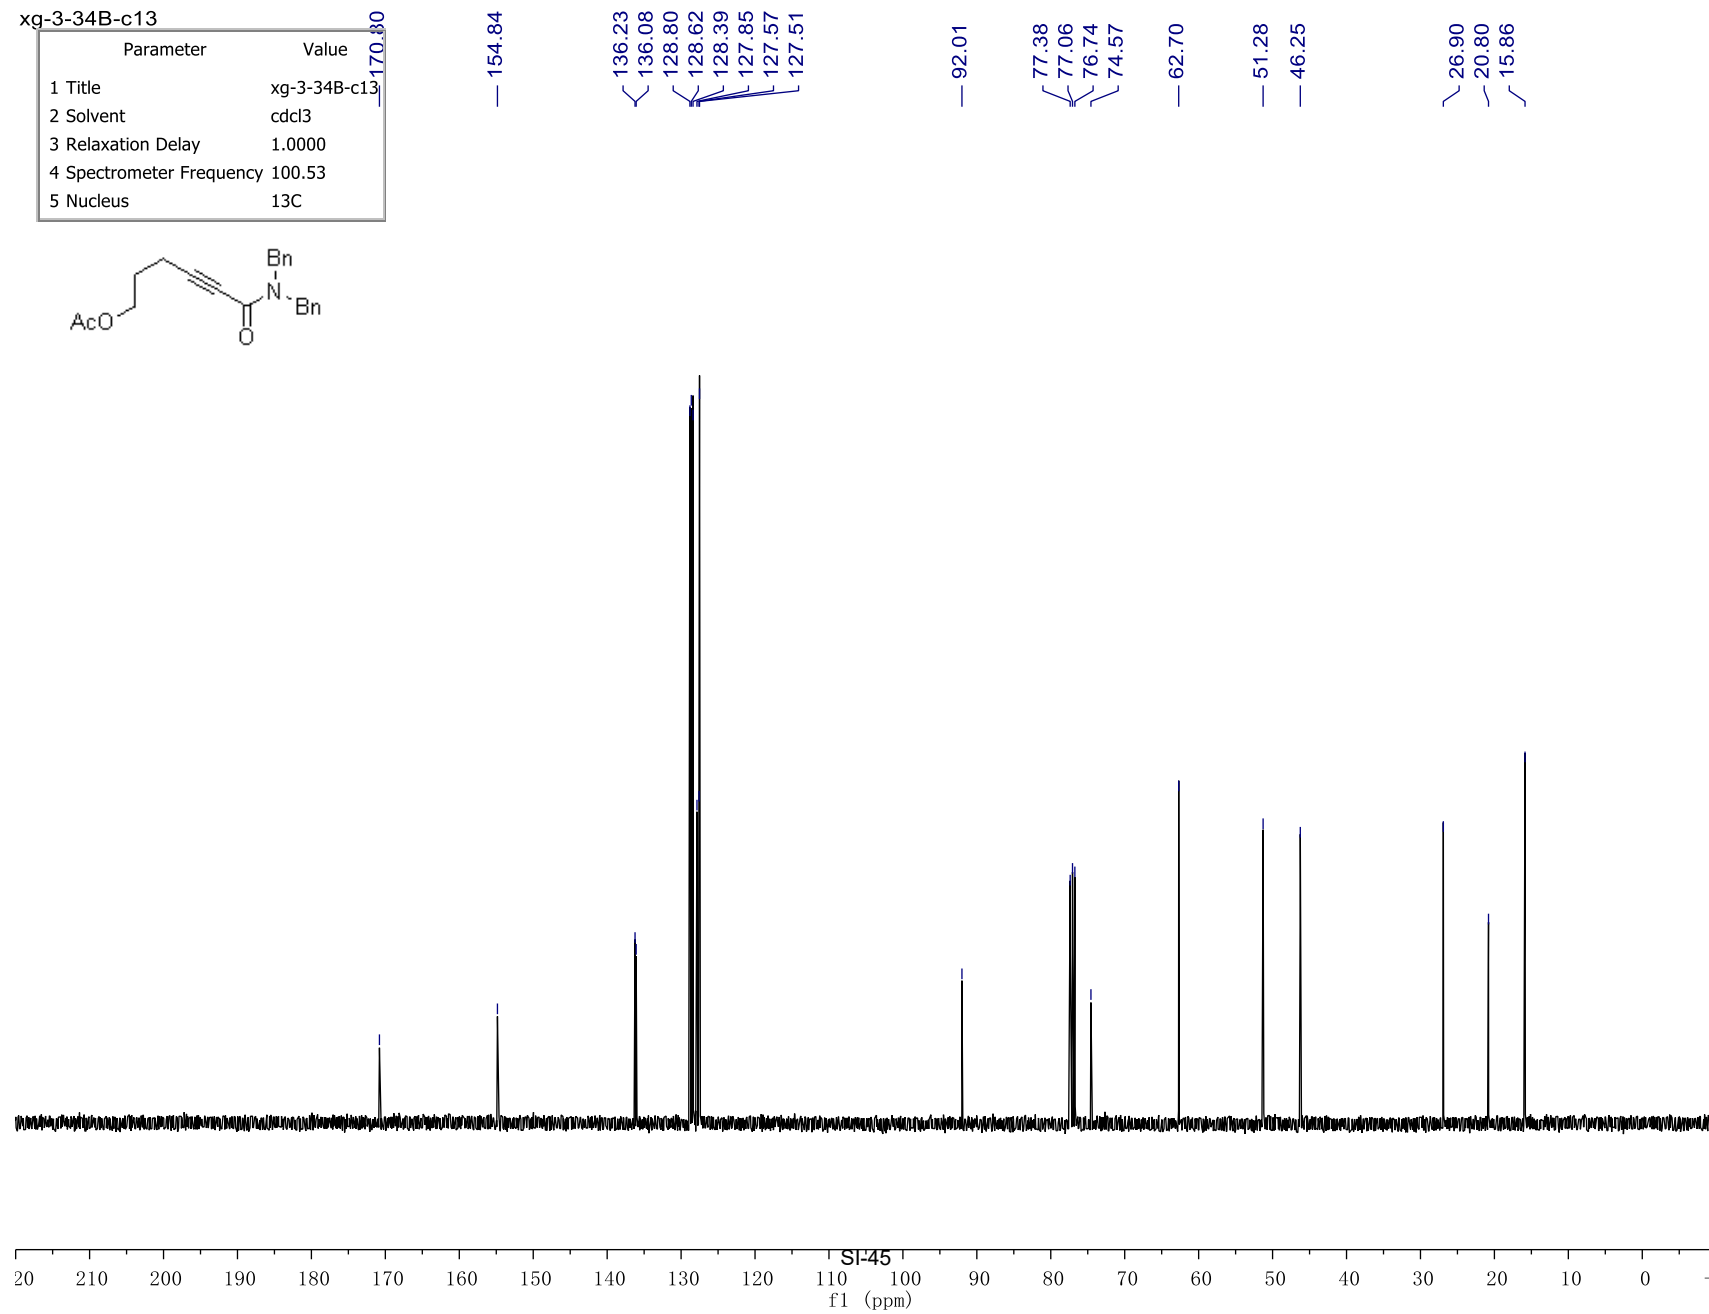

xg-2-228B-h

| Parameter                | Value       |
|--------------------------|-------------|
| 1 Title                  | xg-2-228B-h |
| 2 Solvent                | CDCl3       |
| 3 Relaxation Delay       | 4.8000      |
| 4 Spectrometer Frequency | 499.86      |
| 5 Nucleus                | 1H          |

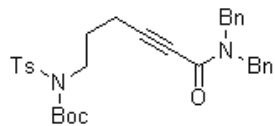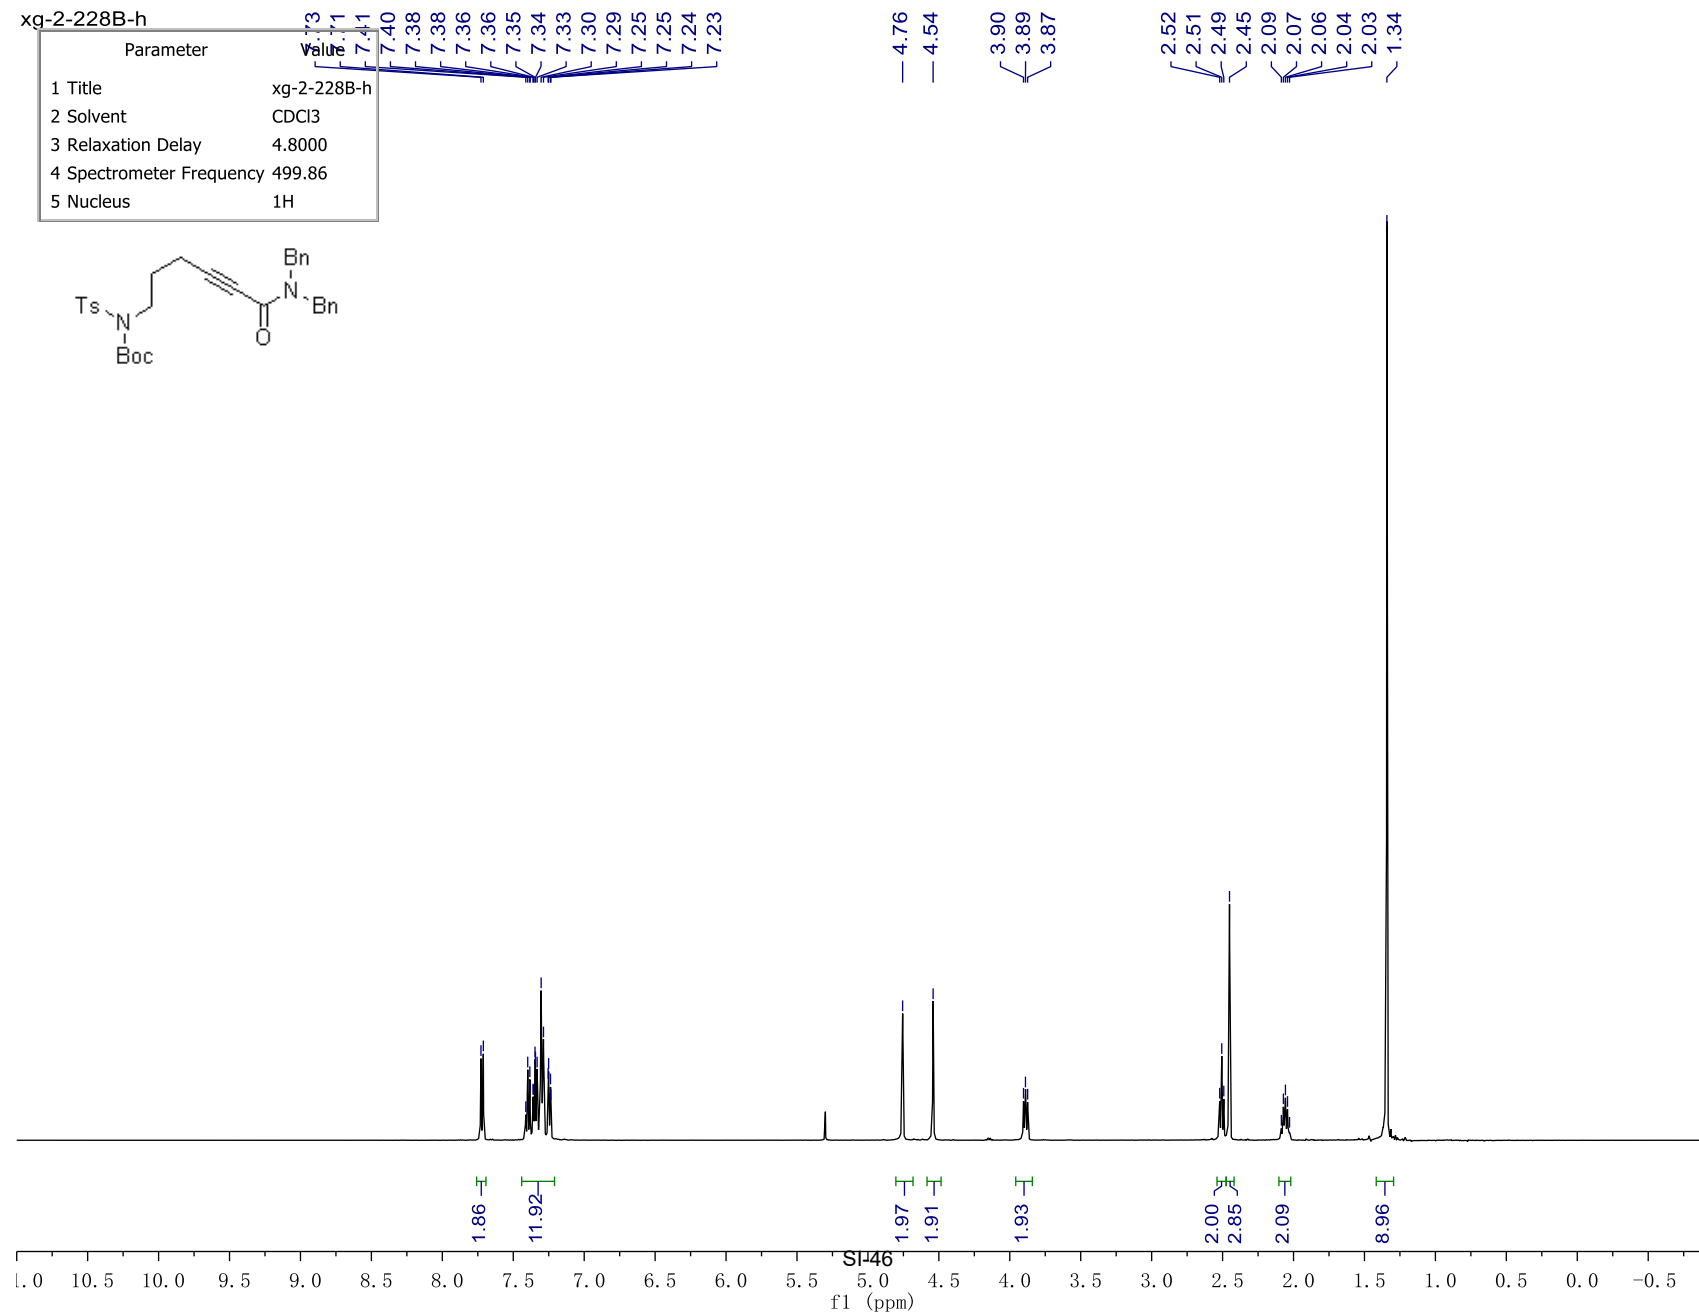

xg-2-228B-c13

| Parameter                | Value         |
|--------------------------|---------------|
| 1 Title                  | xg-2-228B-c13 |
| 2 Solvent                | CDCl3         |
| 3 Relaxation Delay       | 1.0000        |
| 4 Spectrometer Frequency | 125.70        |
| 5 Nucleus                | 13C           |

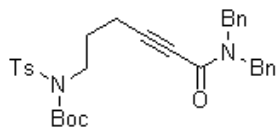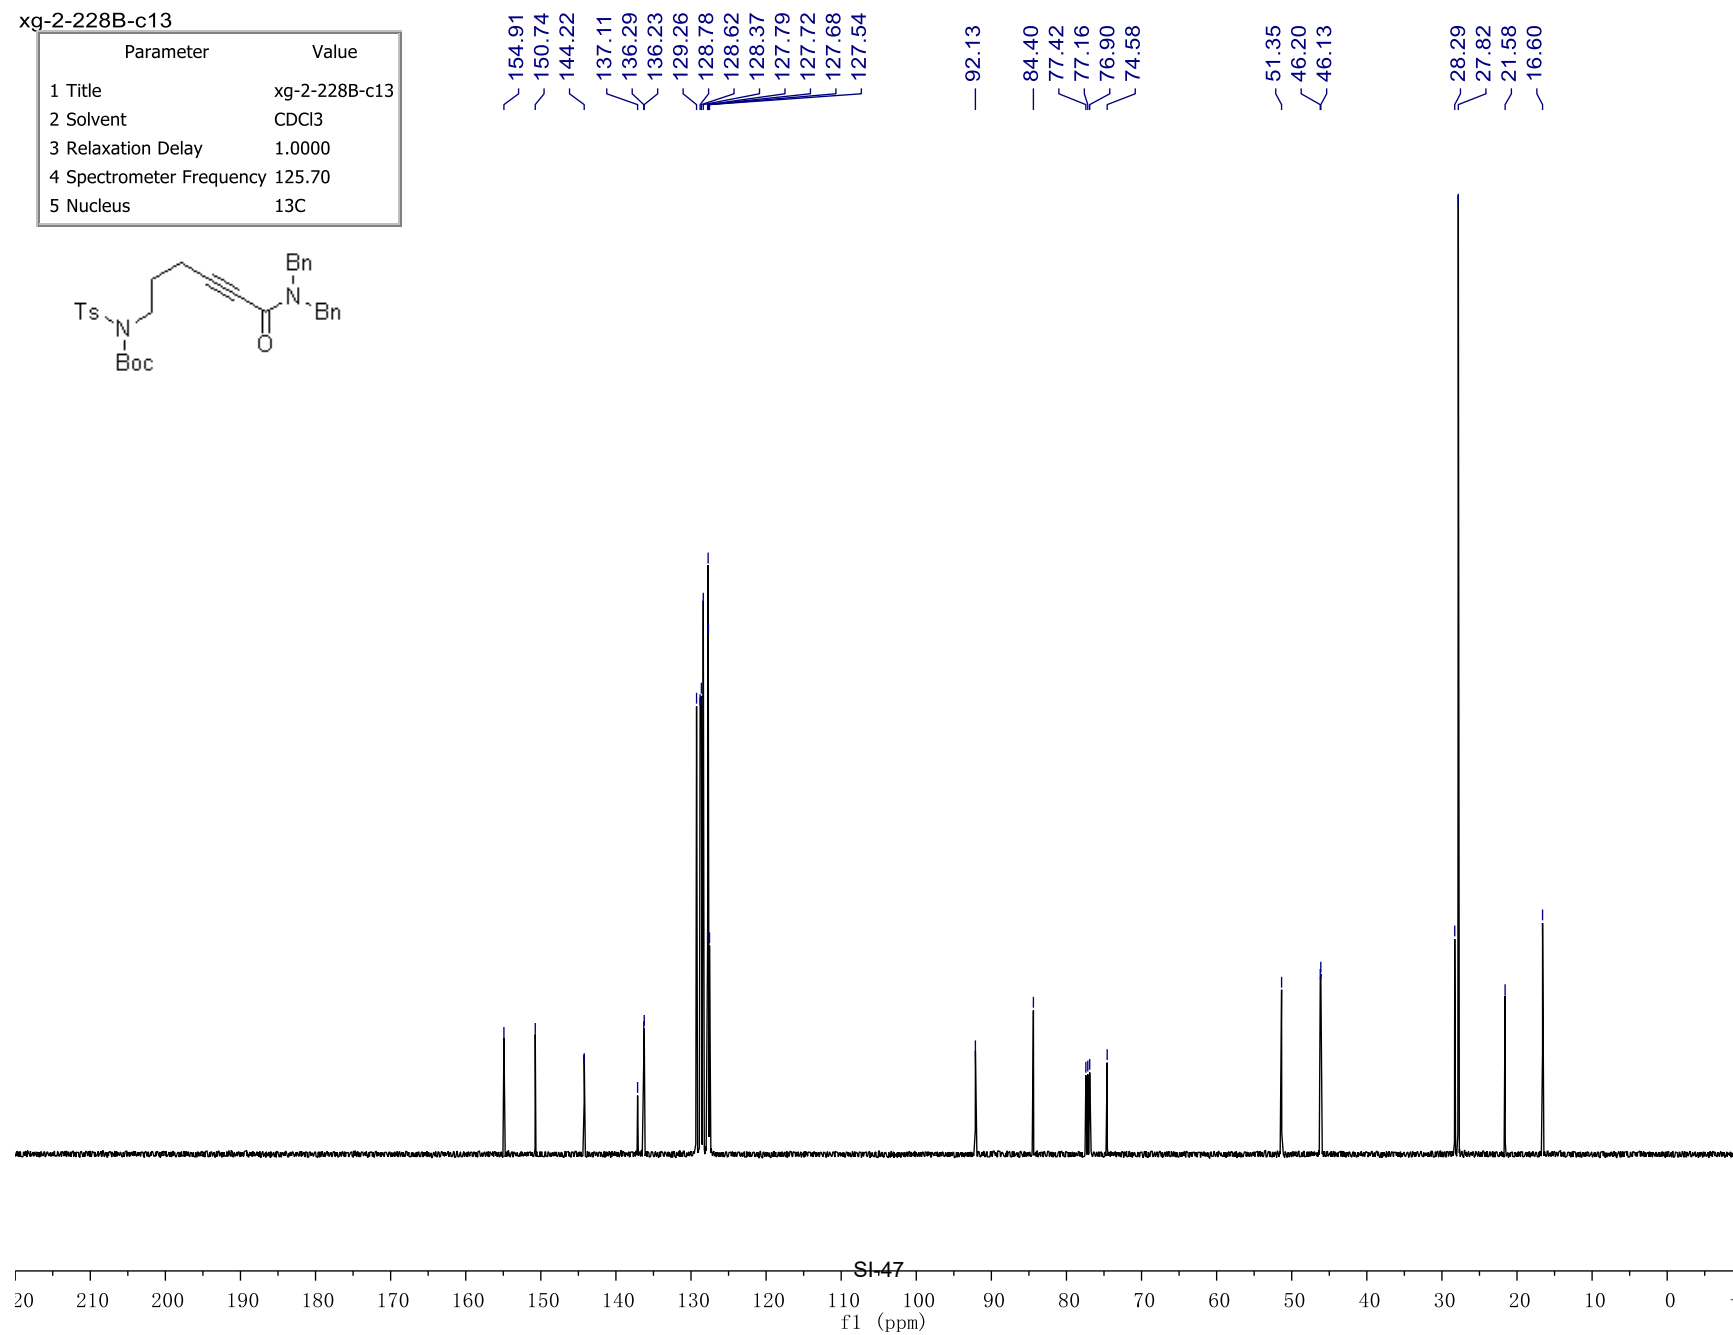

SI-47

xg-2-229A-h

| Parameter                | Value       |
|--------------------------|-------------|
| 1 Title                  | xg-2-229A-h |
| 2 Solvent                | CDCl3       |
| 3 Relaxation Delay       | 4.8000      |
| 4 Spectrometer Frequency | 499.86      |
| 5 Nucleus                | 1H          |

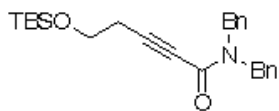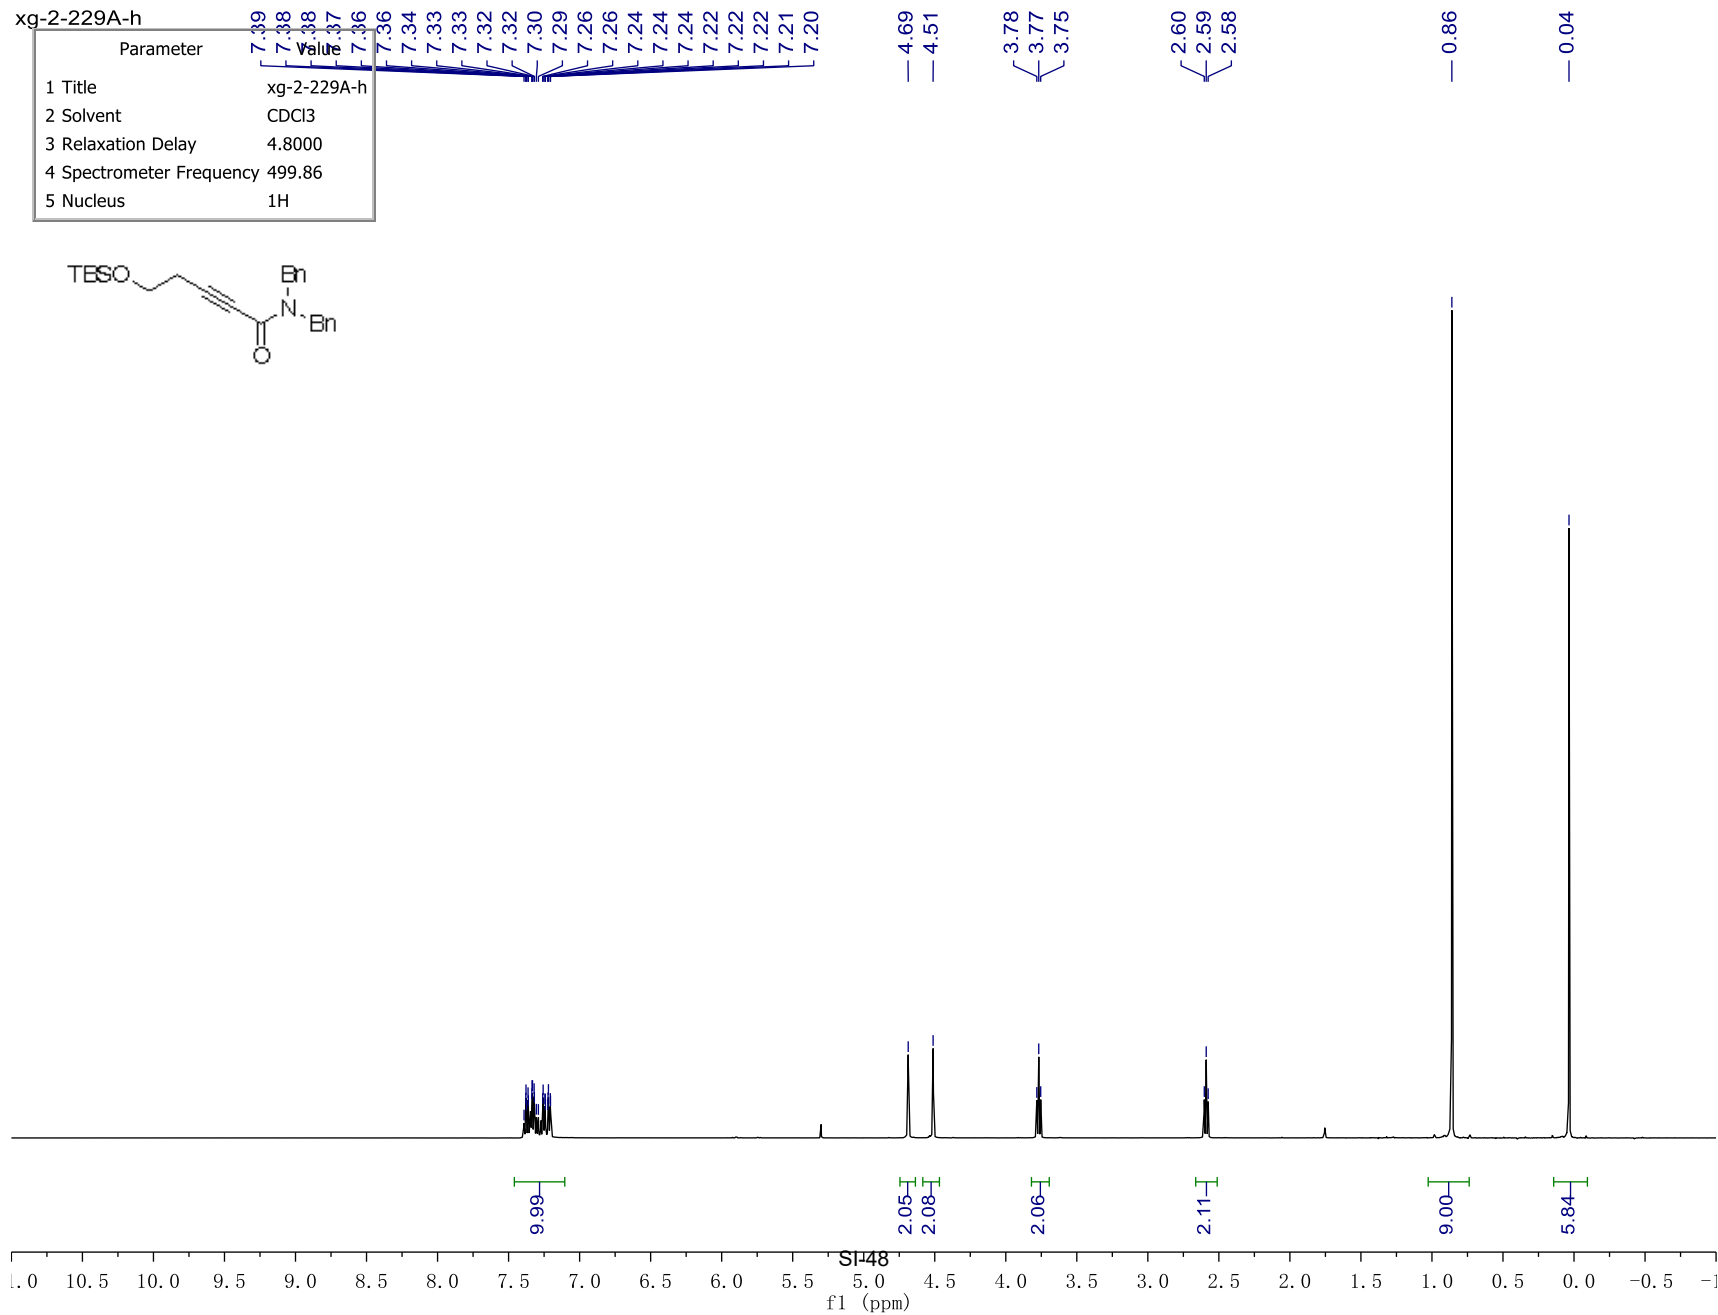



xg-2-229A-c13

| Parameter                | Value         |
|--------------------------|---------------|
| 1 Title                  | xg-2-229A-c13 |
| 2 Solvent                | CDCl3         |
| 3 Relaxation Delay       | 1.0000        |
| 4 Spectrometer Frequency | 125.70        |
| 5 Nucleus                | 13C           |

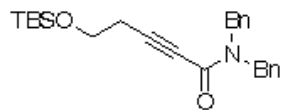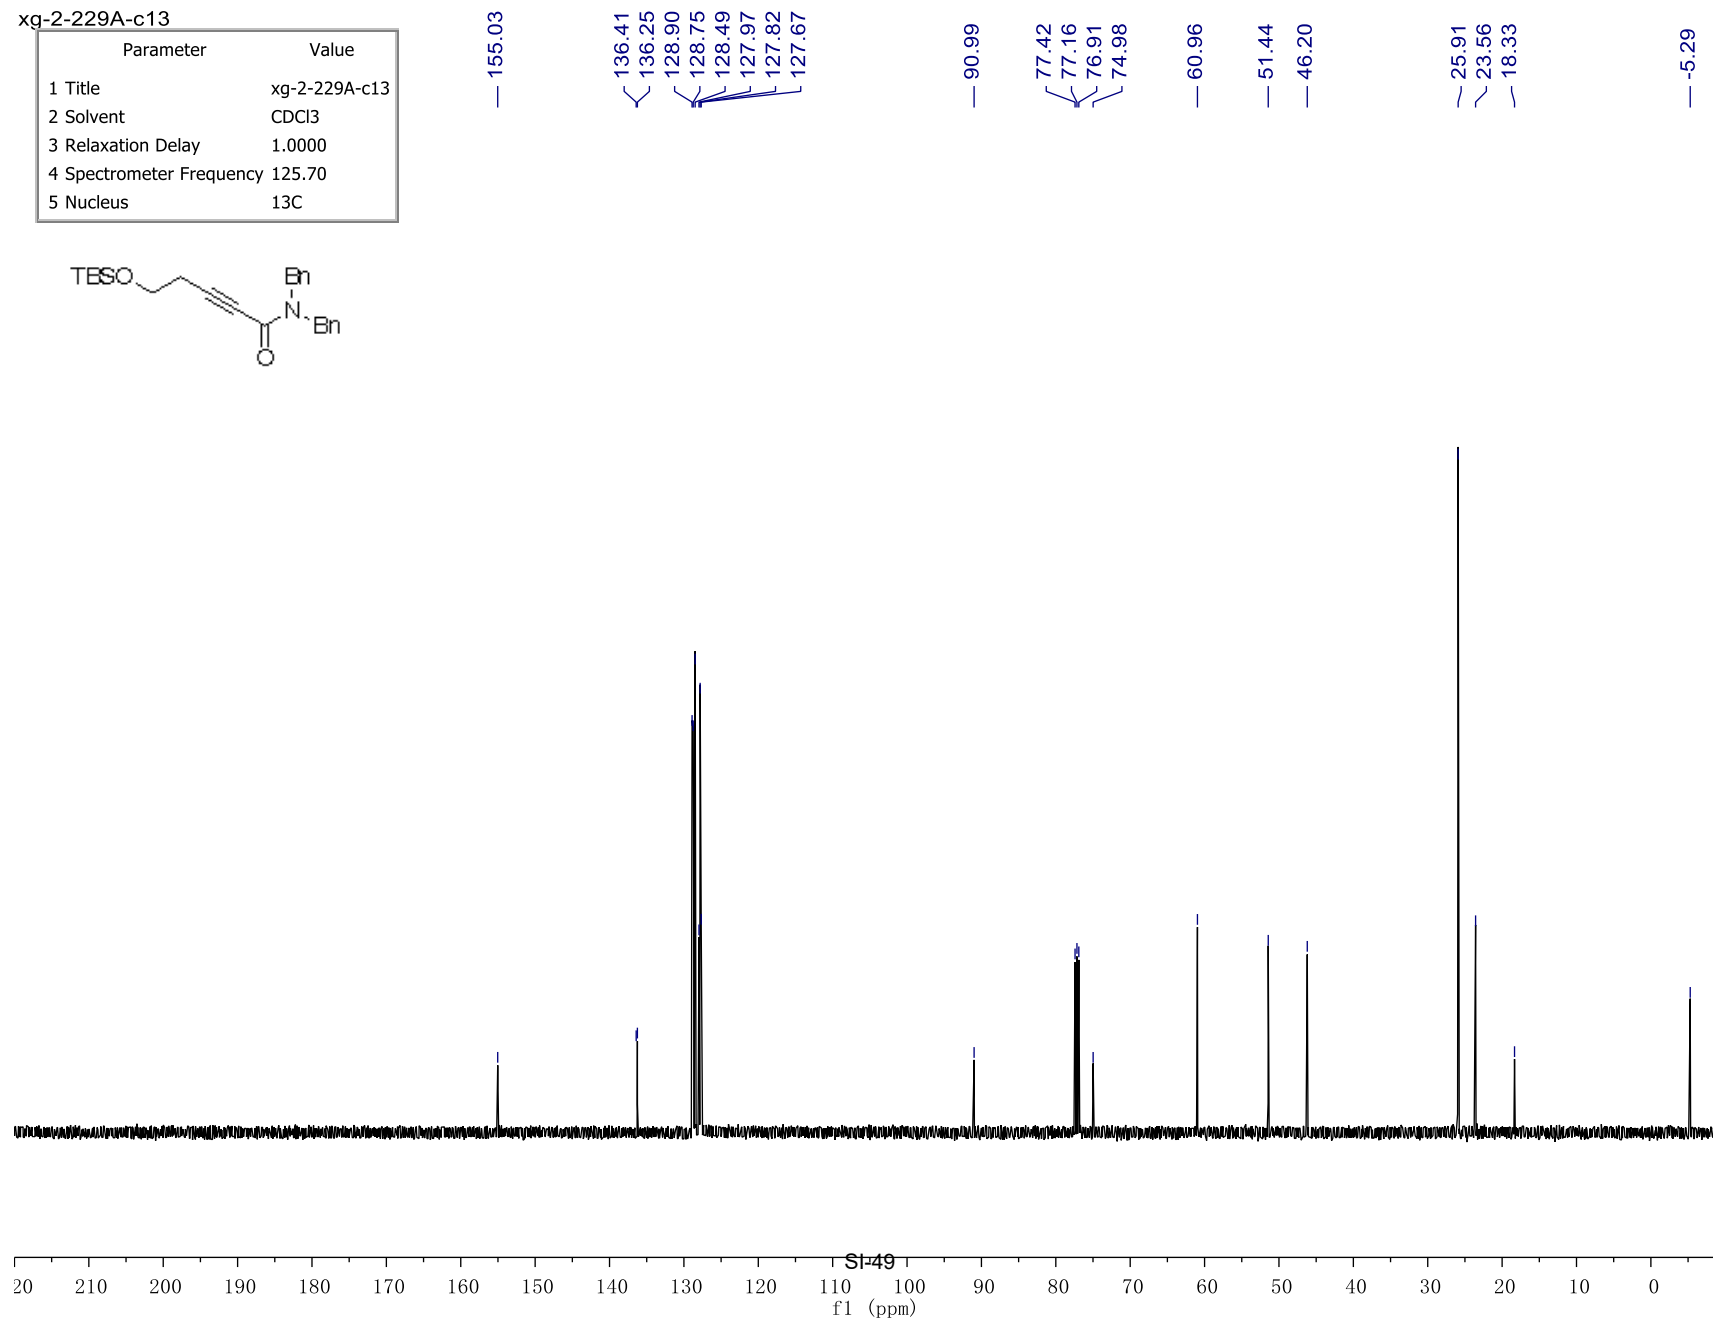

SI-49

mx4h-189-Cy  
 7.44 7.37 7.36 7.35 7.35 7.34 7.34 7.33 7.33 7.32 7.31 7.31 7.30 7.30 7.29 7.27 7.26 7.25 7.24 7.23 5.30 4.70 4.53 2.28 2.26 1.77 1.76 1.76 1.74 1.74 1.74 1.73 1.73 1.69 1.68 1.67 1.66 1.65 1.65 1.64 1.64 1.63 1.63 1.62 1.61 1.61 1.60 1.60 1.54 1.53 1.52 1.52 1.51 1.51 1.22 1.21 1.20 1.19 1.18 1.18 1.16 1.15 1.11 1.08 1.08 1.06 1.02 1.01 0.99 0.98 0.97 0.96

| Parameter              | Value       |
|------------------------|-------------|
| Title                  | mx4h-189-Cy |
| Author                 | vnmr1       |
| Solvent                | cdcl3       |
| Spectrometer Frequency | 499.85      |
| Nucleus                | 1H          |

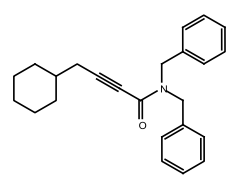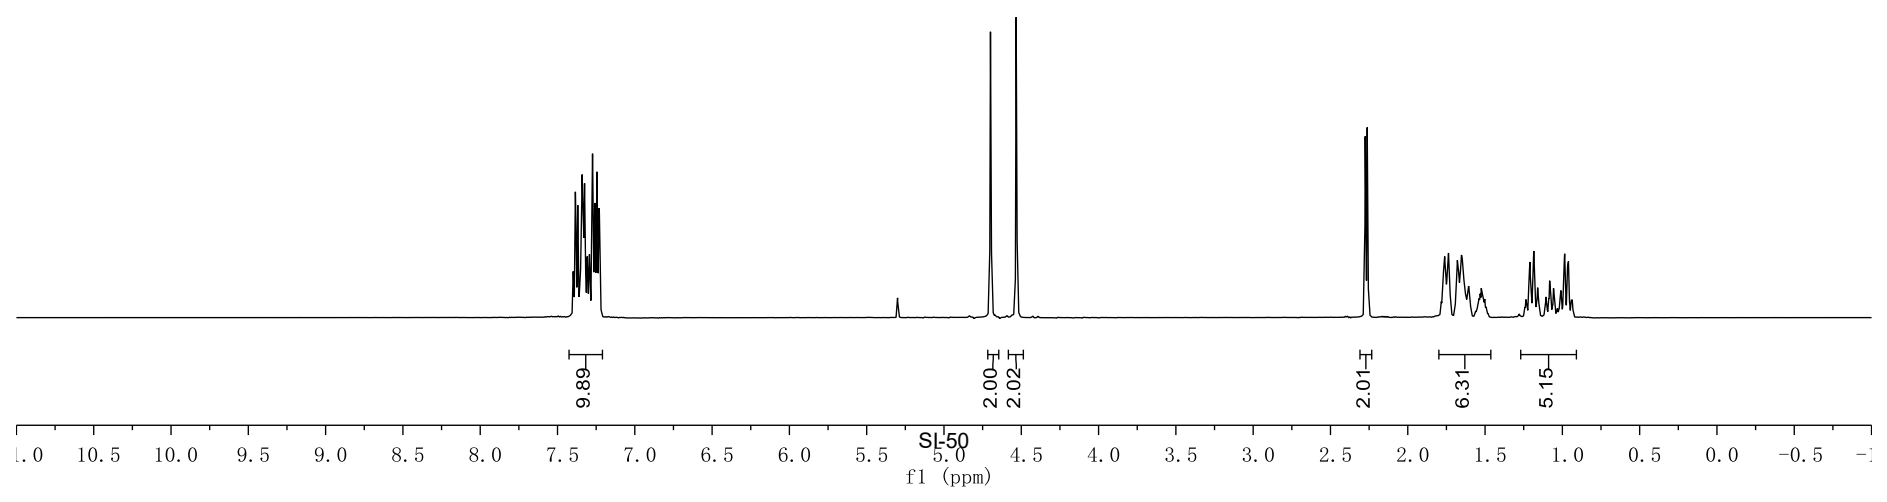

mx4c-189-Cy1

| Parameters             |              |
|------------------------|--------------|
| Parameter              | Value        |
| Title                  | mx4c-189-Cy1 |
| Author                 |              |
| Solvent                | cdcl3        |
| Spectrometer Frequency | 125.70       |
| Nucleus                | 13C          |

— 155.33

136.54  
136.36  
128.86  
128.72  
128.54  
127.88  
127.64  
127.62

— 92.98

— 75.07

— 51.37

— 46.37

— 36.89

— 32.75

26.83

26.07

26.05

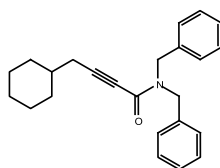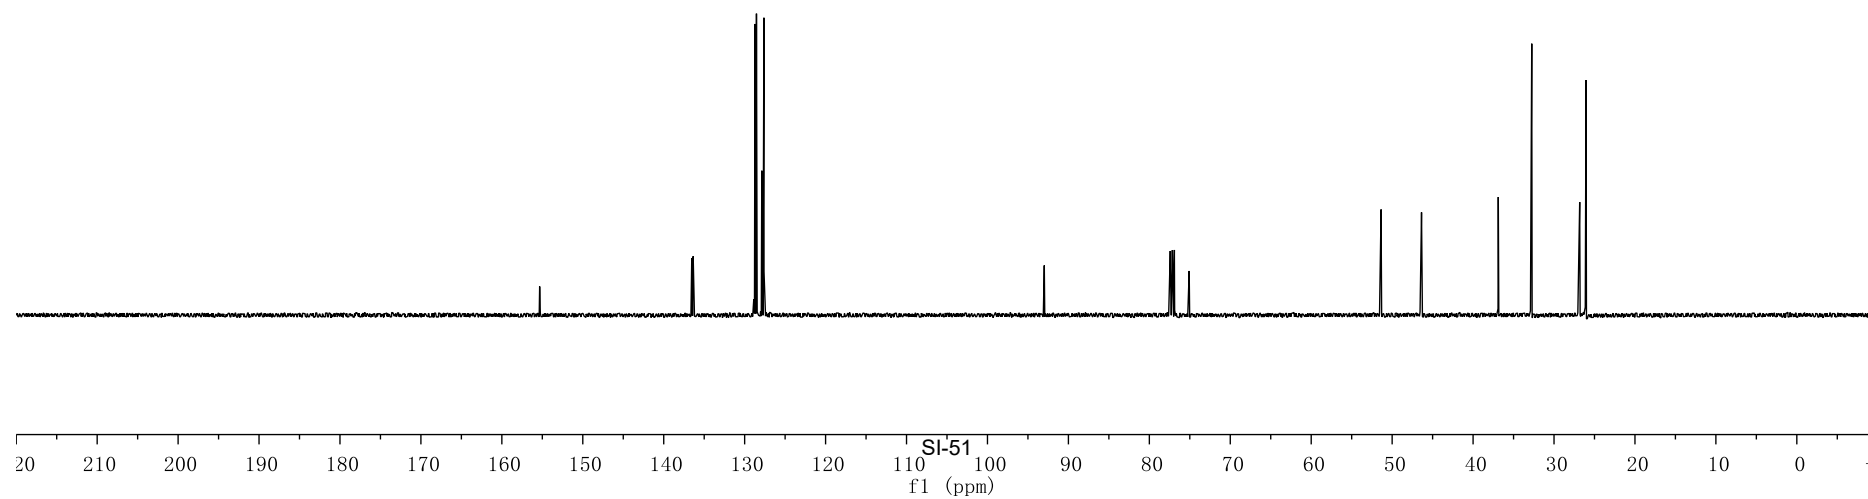

mx4h-189-1m

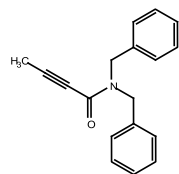

7.40  
7.39  
7.39  
7.38  
7.38  
7.37  
7.36  
7.35  
7.35  
7.35  
7.34  
7.33  
7.33  
7.32  
7.32  
7.32  
7.31  
7.30  
7.30  
7.29  
7.27  
7.27  
7.26  
7.25  
7.25  
7.25  
7.22  
7.22  
7.21  
7.21  
7.20  
— 4.68  
— 4.51

— 2.02

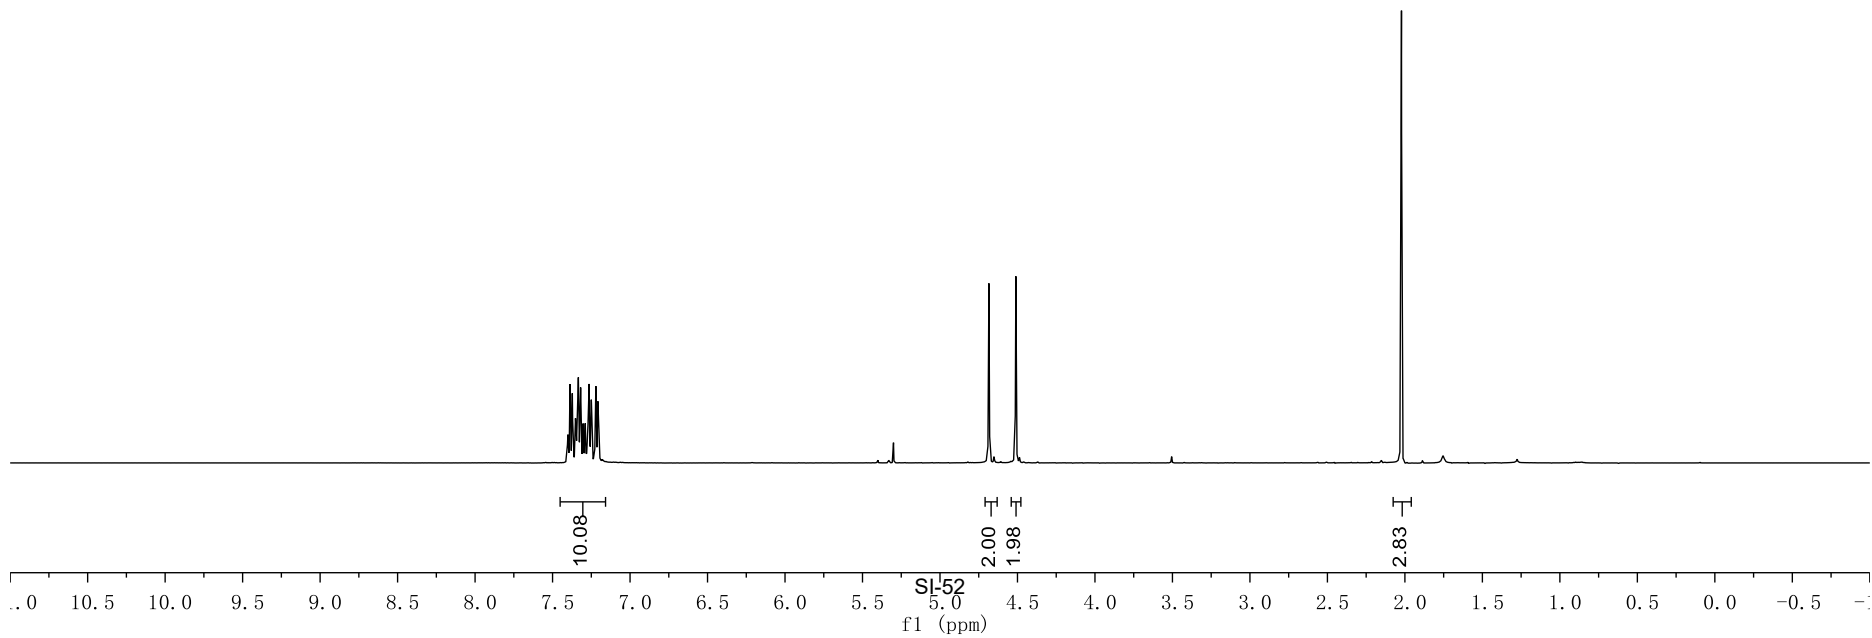

mx4c-189-1m

| Parameters             |             |
|------------------------|-------------|
| Parameter              | Value       |
| Title                  | mx4c-189-1m |
| Author                 |             |
| Solvent                | cdcl3       |
| Spectrometer Frequency | 125.70      |
| Nucleus                | 13C         |

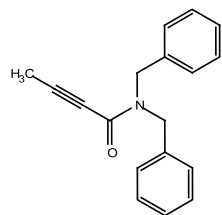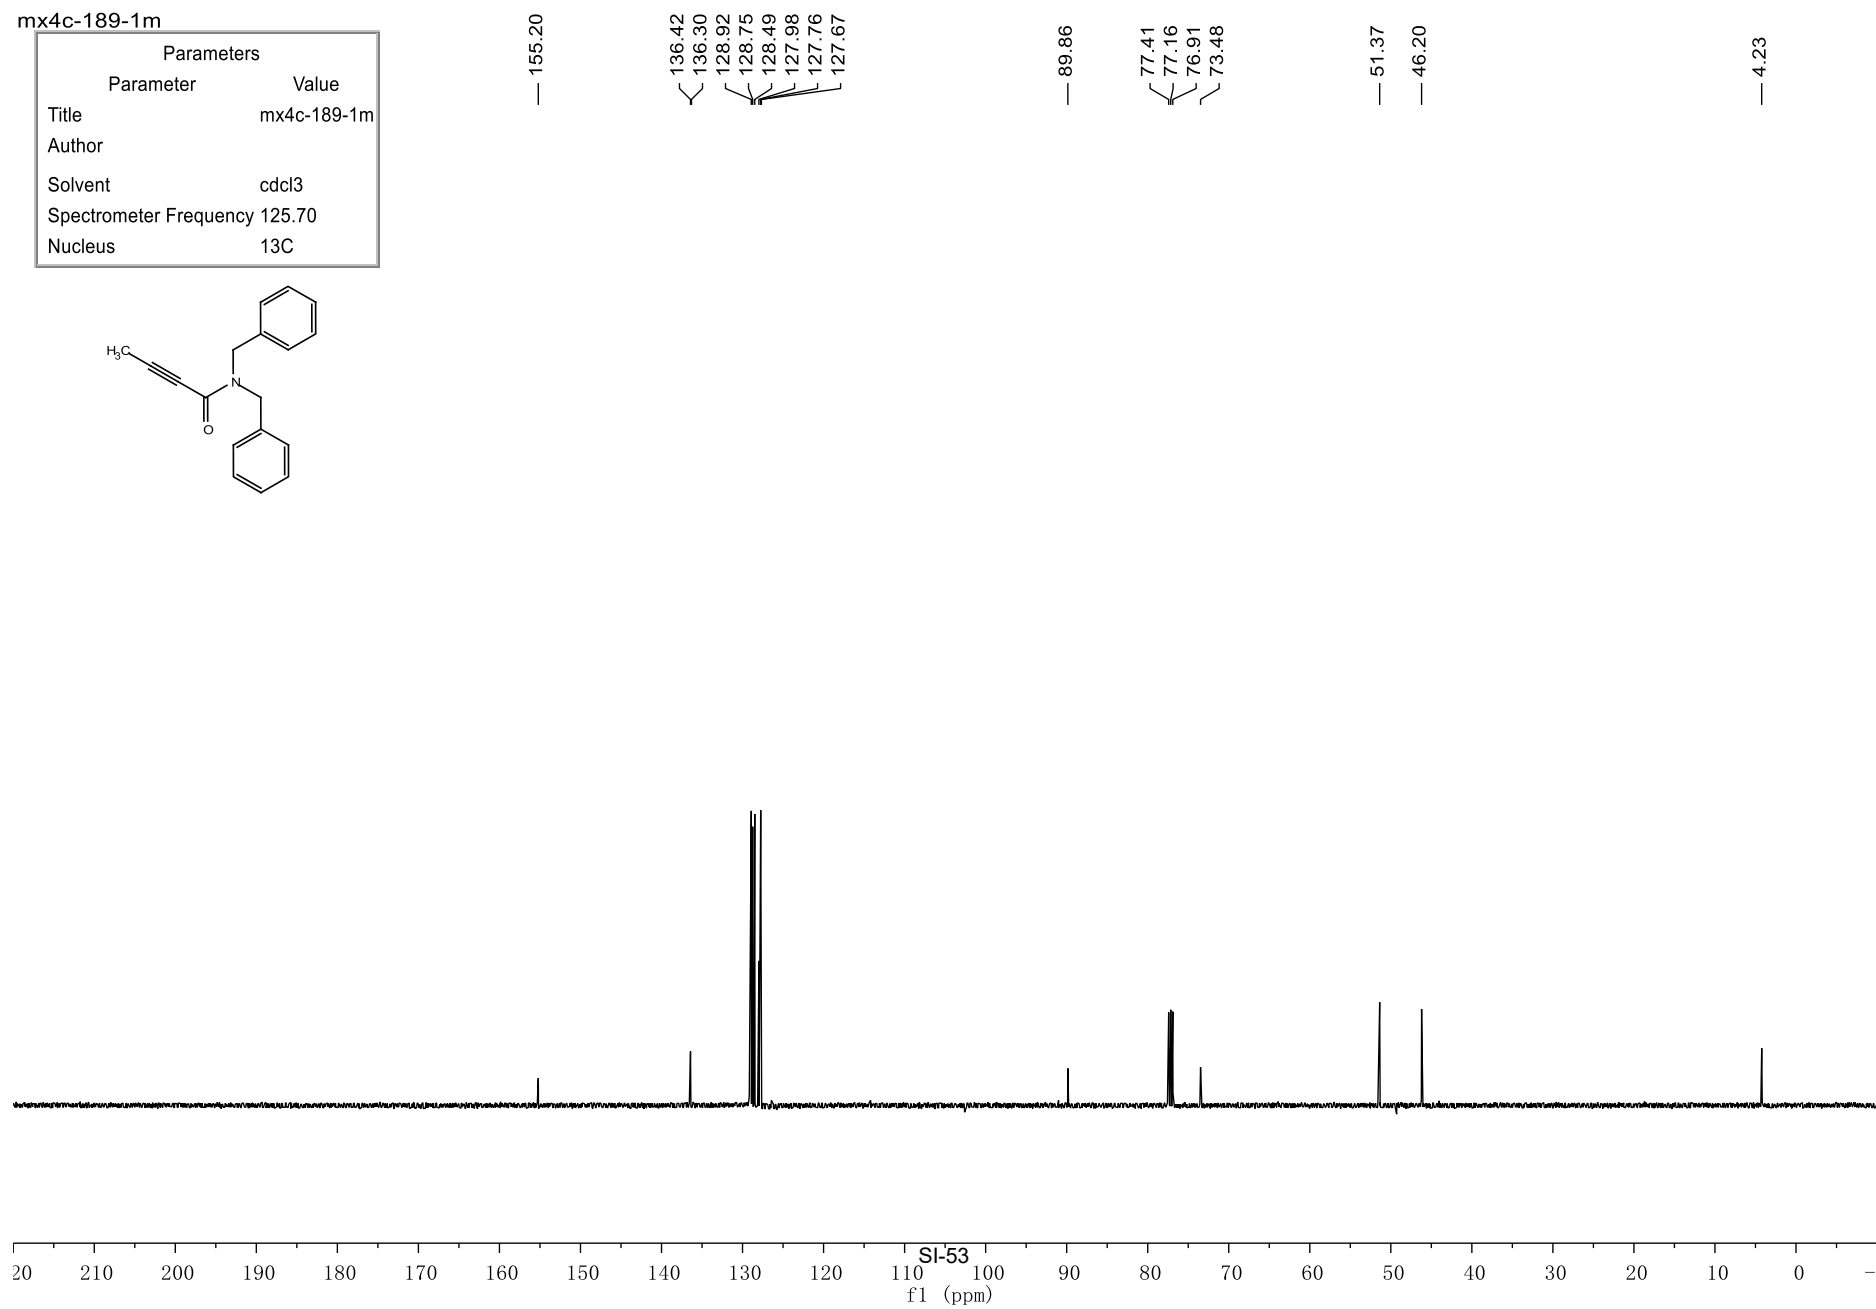

mx5h-167B-P

| Parameter              | Value       |
|------------------------|-------------|
| Title                  | mx5h-167B-P |
| Solvent                | cdcl3       |
| Spectrometer Frequency | 499.85      |
| Nucleus                | 1H          |

Parameters

Parameter Value

Title mx5h-167B-P

Solvent cdcl3

Spectrometer Frequency 499.85

Nucleus 1H

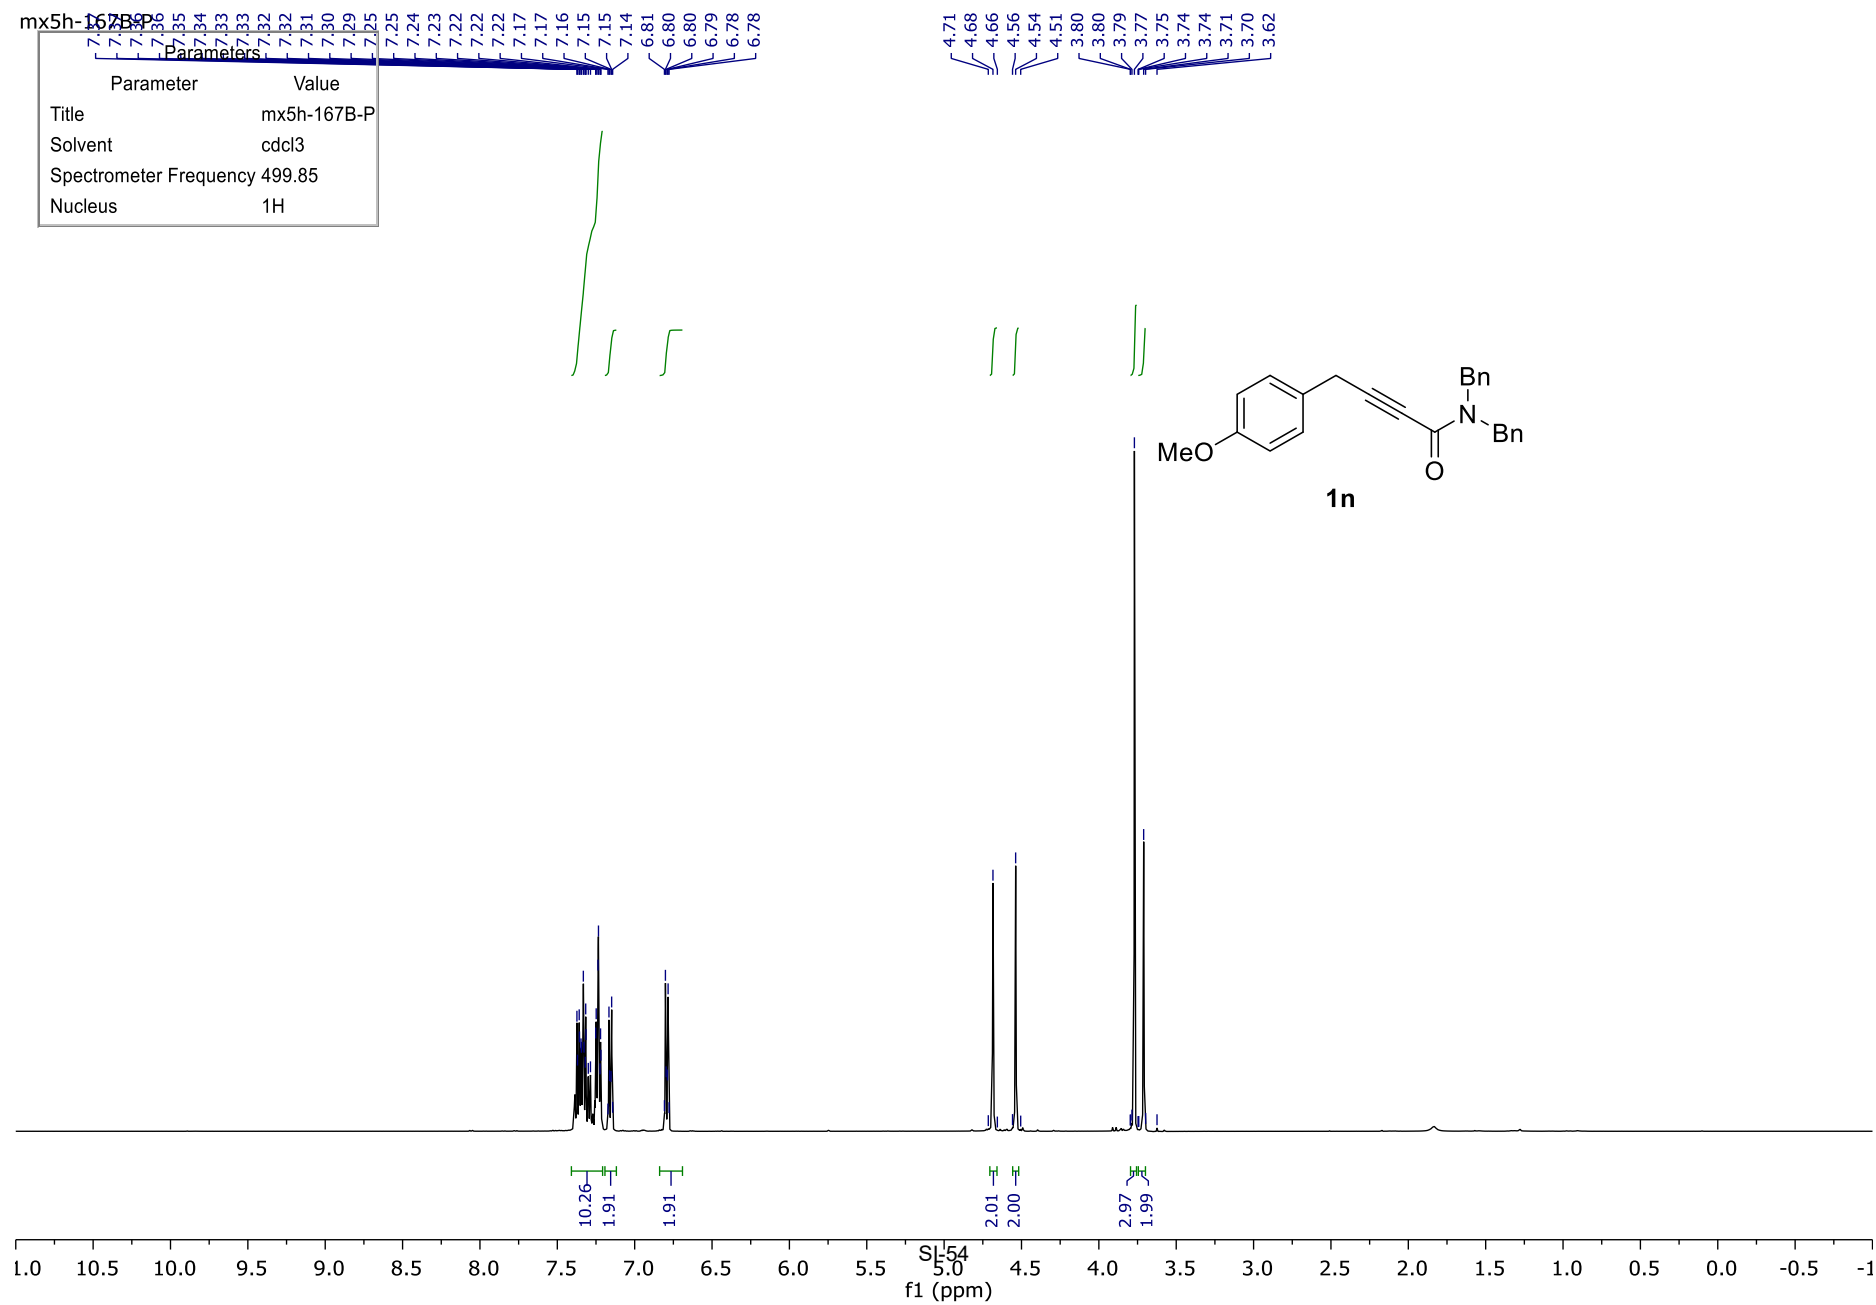

mx5c-167B-P

| Std carbon | Parameters             | Value       |
|------------|------------------------|-------------|
|            | Parameter              | Value       |
|            | Title                  | mx5c-167B-P |
|            | Solvent                | cdcl3       |
|            | Spectrometer Frequency | 125.70      |
|            | Nucleus                | 13C         |

158.69  
155.07  
136.38  
136.22  
129.01  
128.90  
128.83  
128.74  
128.58  
128.52  
127.94  
127.69  
127.65  
127.36  
126.62  
114.19

91.40

75.69

55.36  
51.39  
46.44

24.61

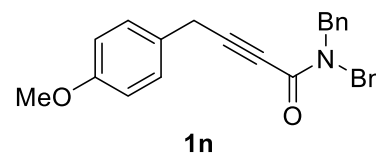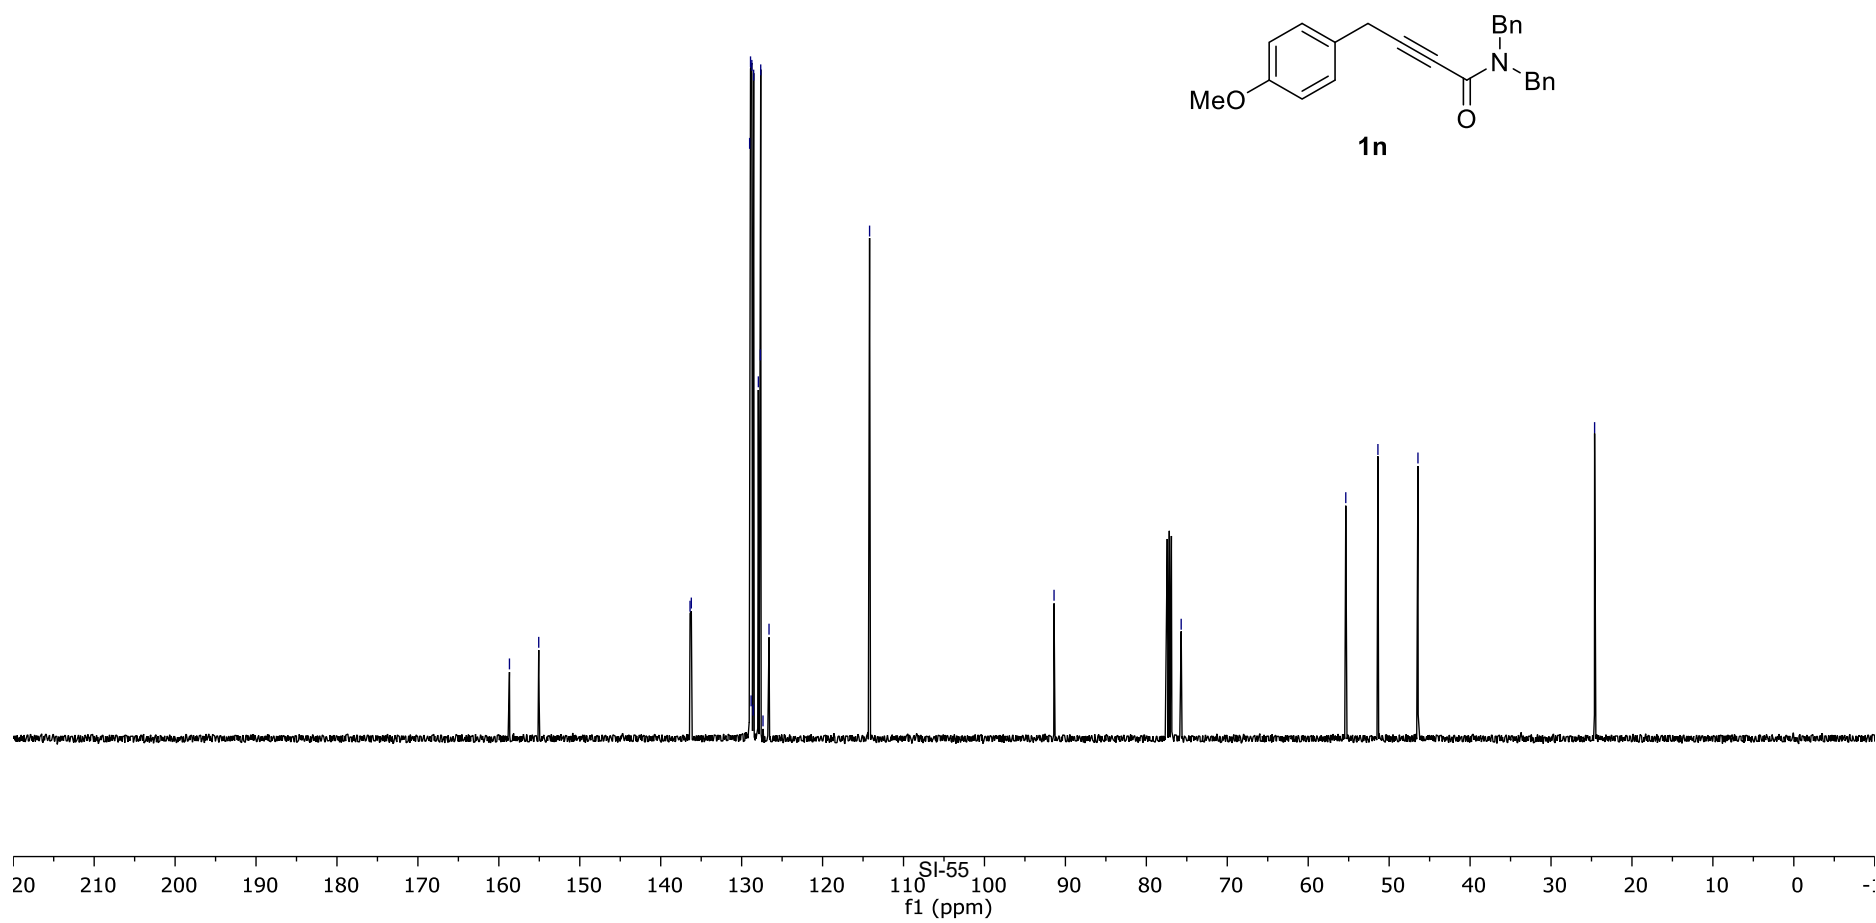

mx5h-178A-PFinal

| Parameters             |                  |
|------------------------|------------------|
| Parameter              | Value            |
| Title                  | mx5h-178A-PFinal |
| Solvent                | cdcl3            |
| Spectrometer Frequency | 599.64           |
| Nucleus                | 1H               |

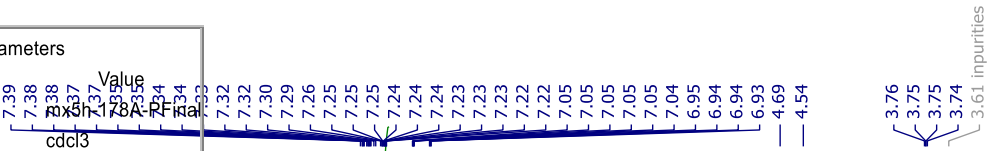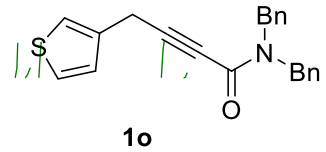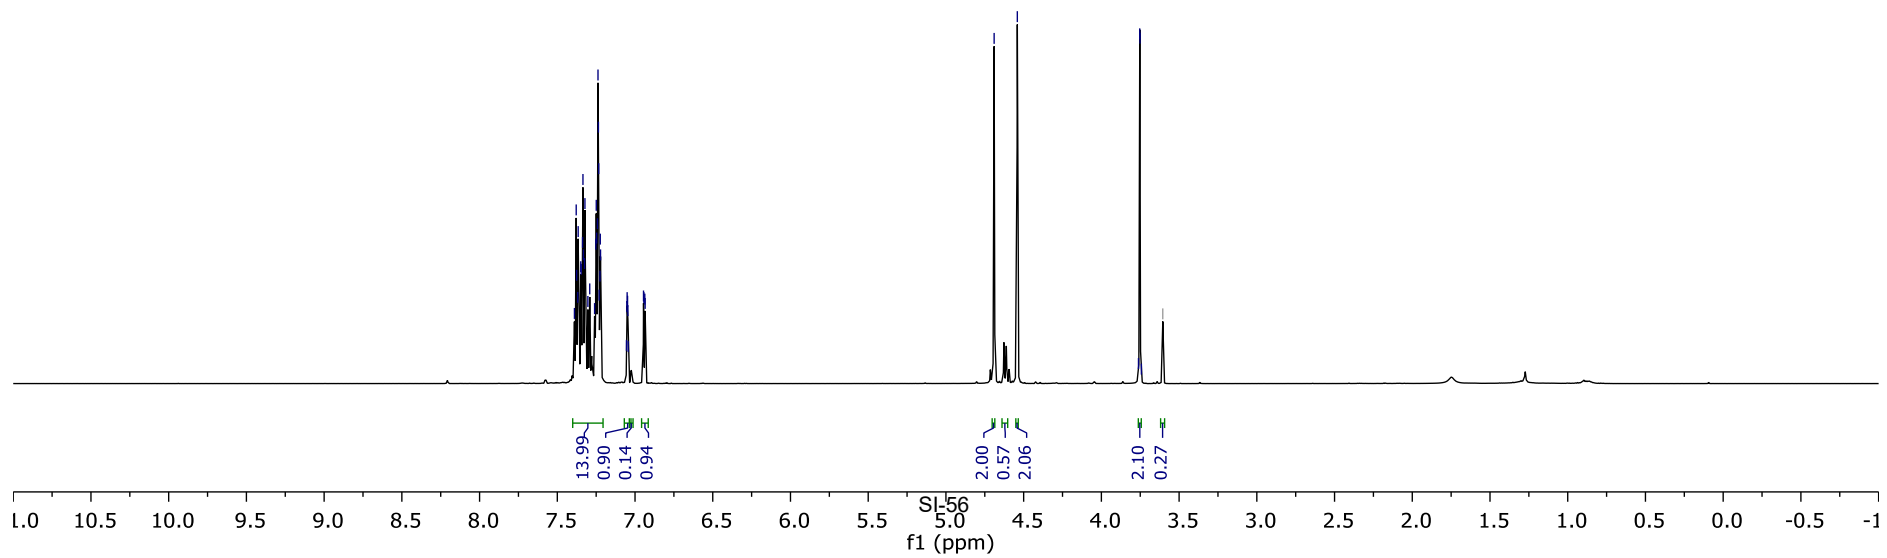



mx5c-178A-PFinal

| Std carbon             | Parameters       |
|------------------------|------------------|
| Parameter              | Value            |
| Title                  | mx5c-178A-PFinal |
| Solvent                | cdcl3            |
| Spectrometer Frequency | 150.79           |
| Nucleus                | 13C              |

— 154.88

136.23  
136.07  
134.38  
128.86  
128.67  
128.43  
127.89  
127.63  
127.51  
127.36  
126.28

— 90.49

— 75.24

— 51.28

— 46.38

— 20.49

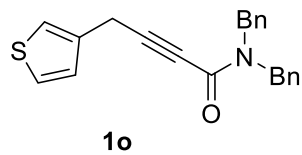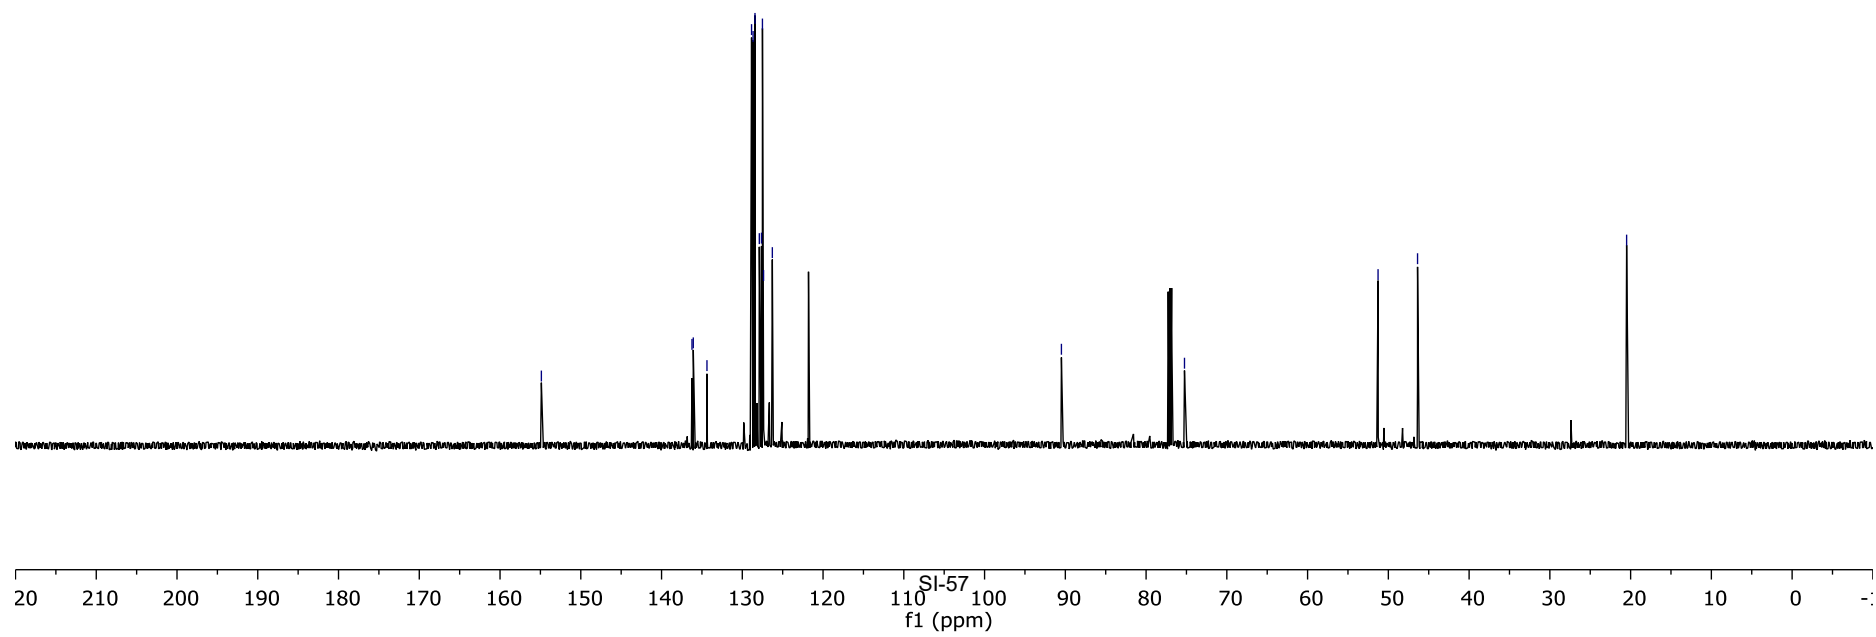

xg-2-227B-h

| Parameter                | Value       |
|--------------------------|-------------|
| 1 Title                  | xg-2-227B-h |
| 2 Solvent                | CDCl3       |
| 3 Relaxation Delay       | 4.8000      |
| 4 Spectrometer Frequency | 499.86      |
| 5 Nucleus                | 1H          |

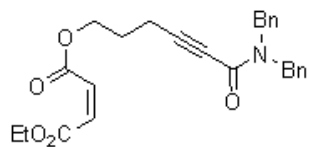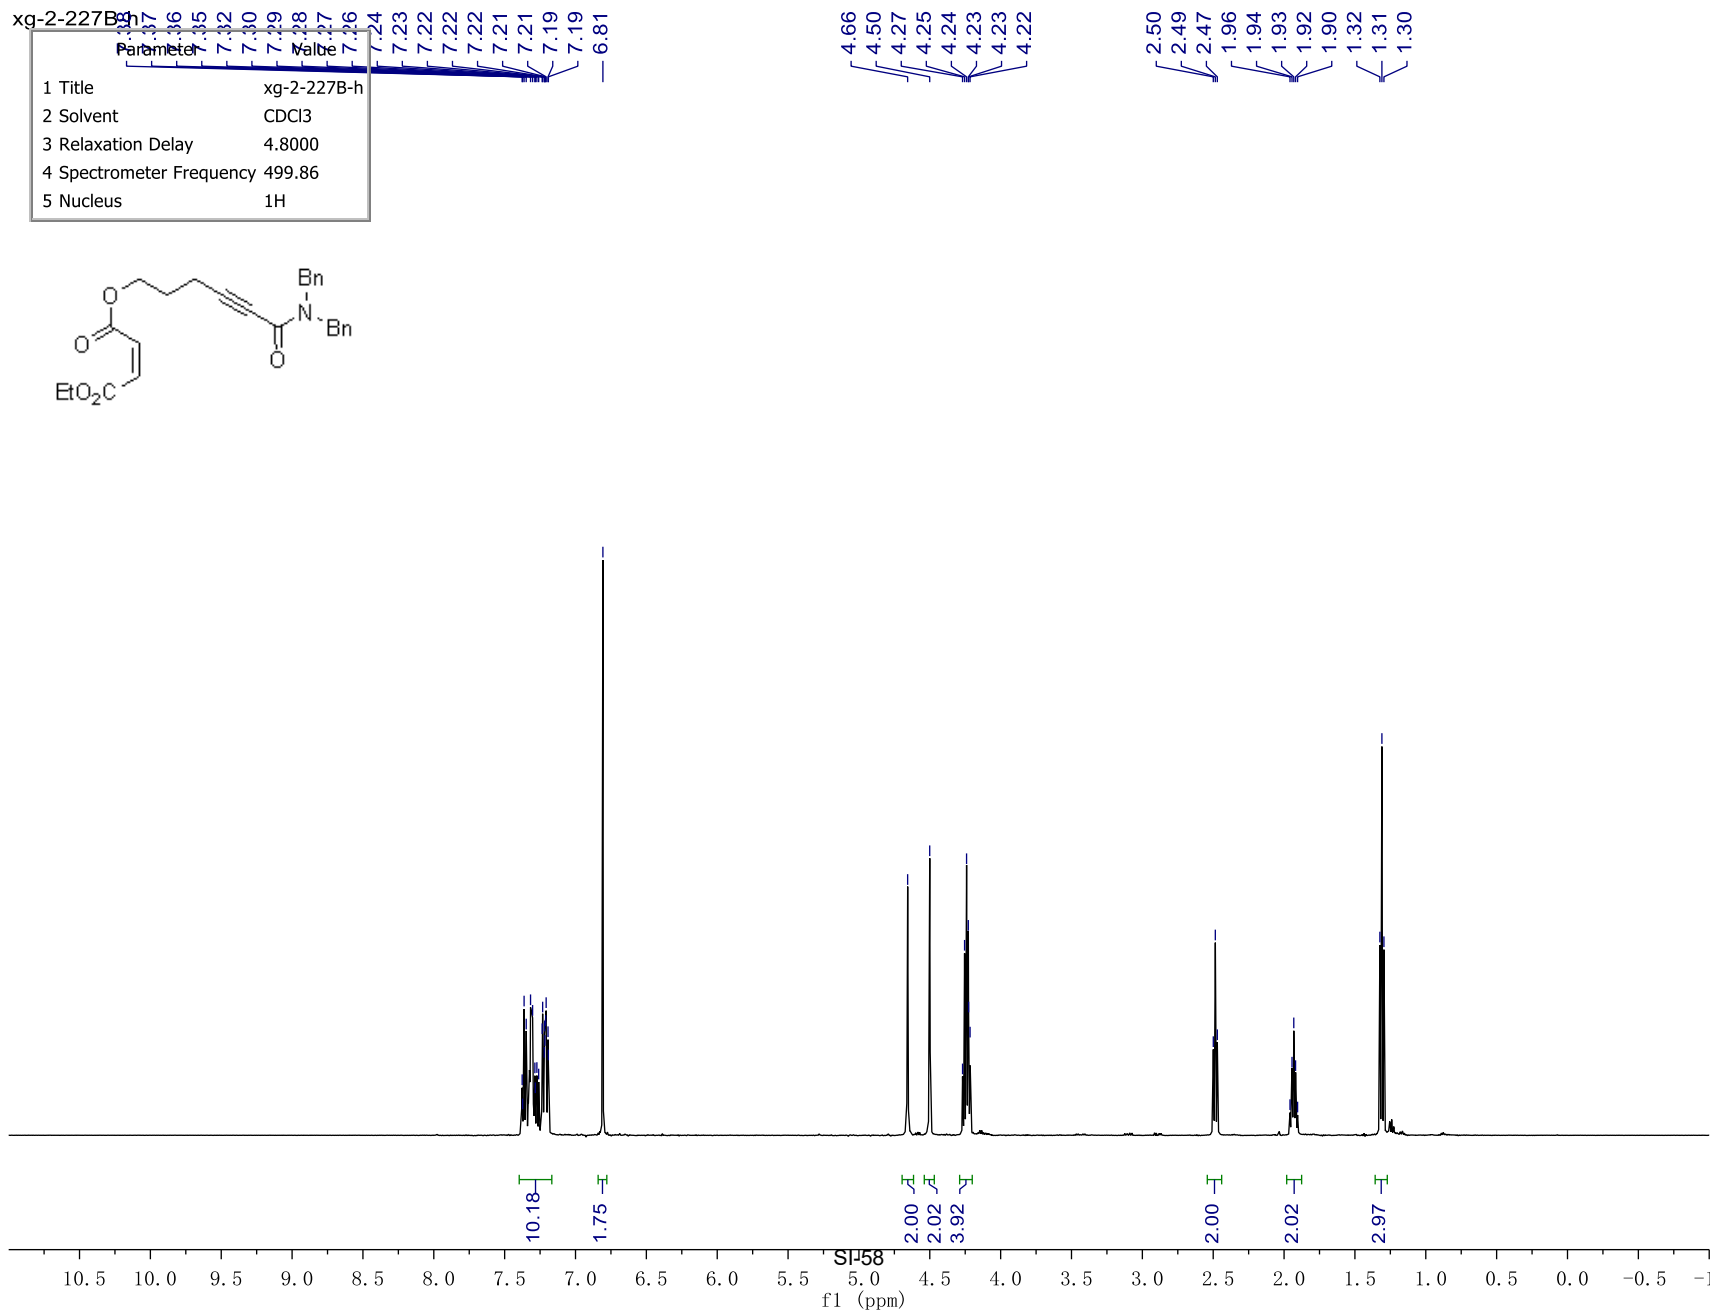

xg-2-227B-c13

| Parameter                | Value         |
|--------------------------|---------------|
| 1 Title                  | xg-2-227B-c13 |
| 2 Solvent                | CDCl3         |
| 3 Relaxation Delay       | 1.0000        |
| 4 Spectrometer Frequency | 125.70        |
| 5 Nucleus                | 13C           |

164.88  
164.80  
154.89  
136.32  
136.15  
134.12  
133.11  
128.93  
128.75  
128.51  
127.98  
127.70  
127.58

91.70

77.41  
77.16  
76.90  
74.88

63.59  
61.47

51.40  
46.41

26.91

15.88  
14.19

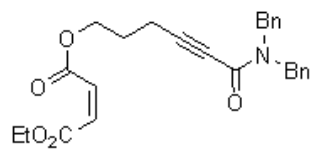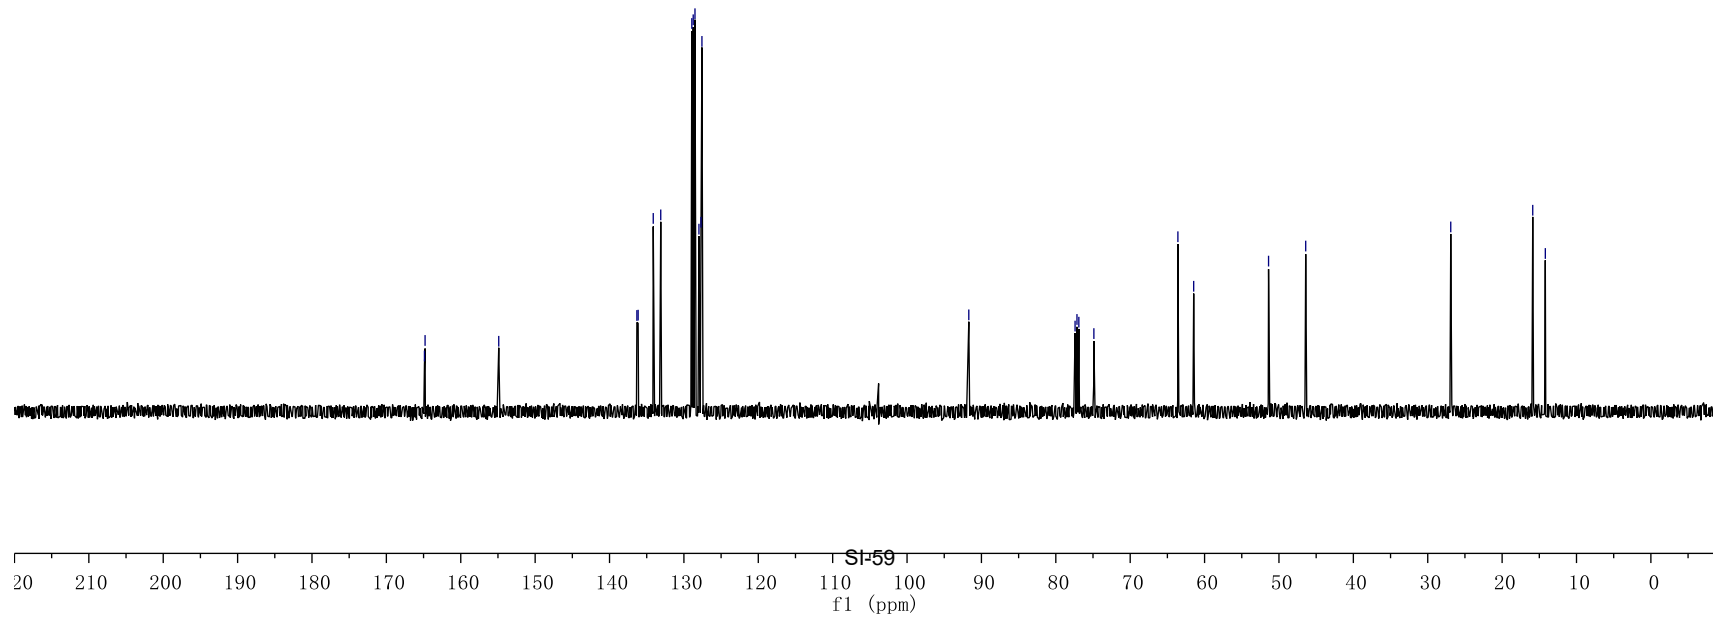

mx1h-104-1

| Parameters             | Value      |
|------------------------|------------|
| Title                  | mx1h-104-1 |
| Author                 | vnmr1      |
| Solvent                | CDCl3      |
| Spectrometer Frequency | 499.86     |
| Nucleus                | 1H         |

7.68  
7.68  
7.67  
7.67  
7.66  
7.64  
7.44  
7.43  
7.42  
7.42  
7.39  
7.39  
7.39  
7.26  
7.25  
7.25  
7.24  
7.23  
6.45  
6.42

3.79  
3.78  
3.47  
3.23  
2.08  
1.65  
1.65

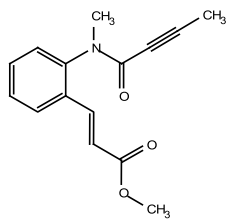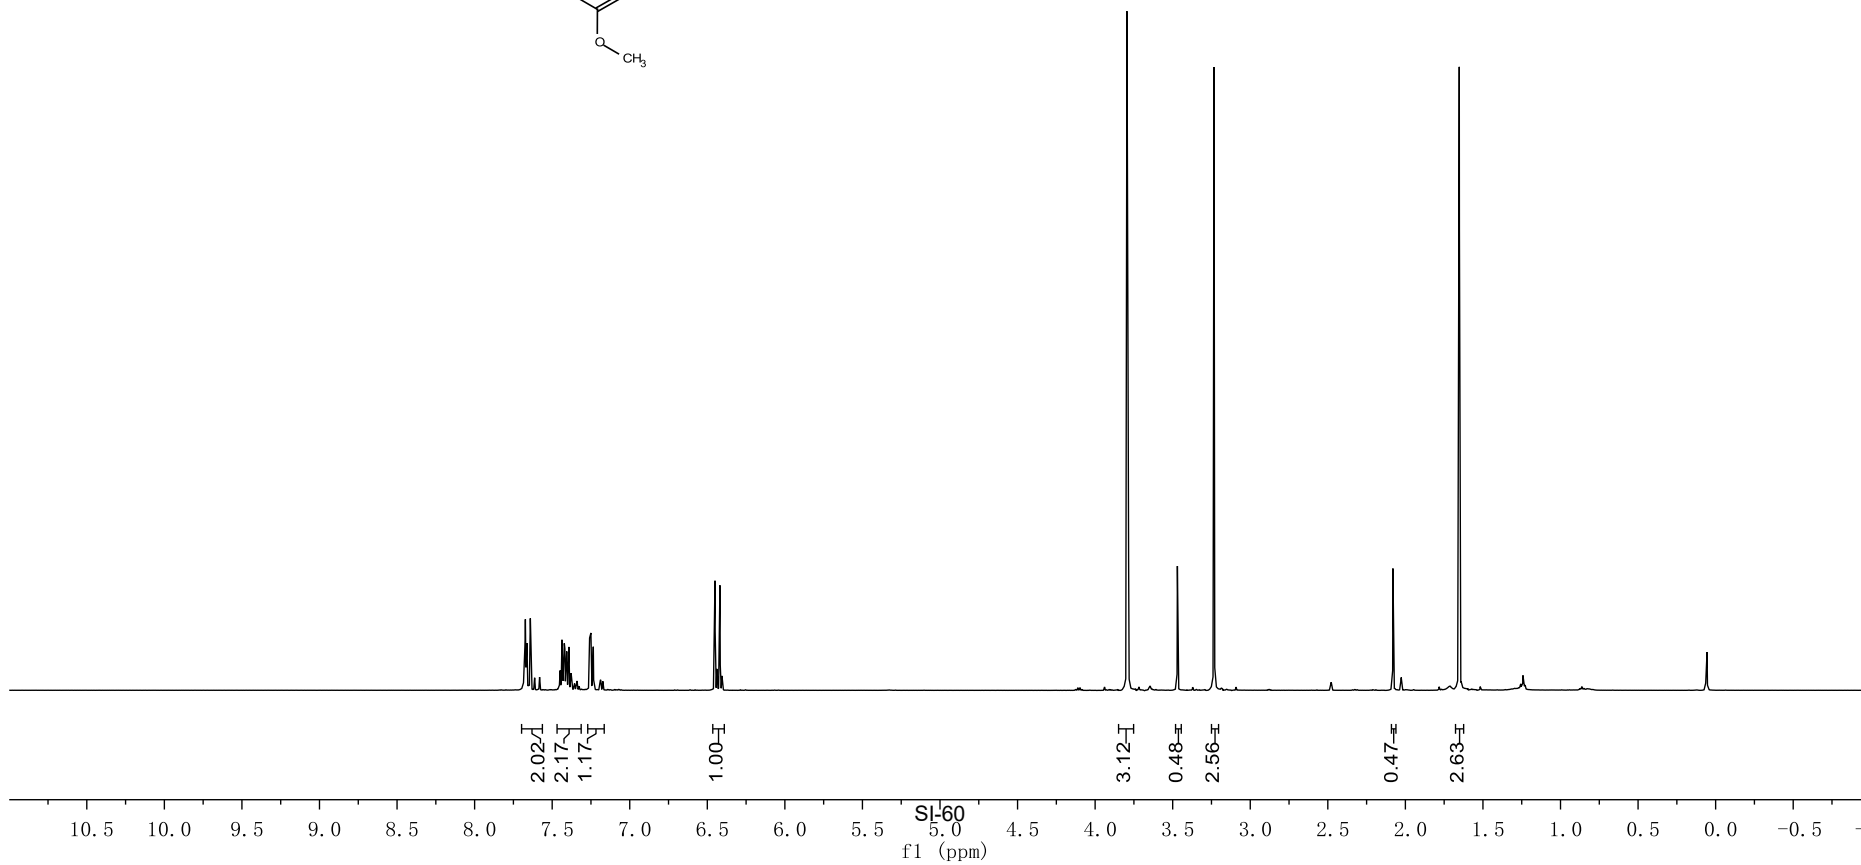

mx1c-104-1

| Parameters             |            |
|------------------------|------------|
| Parameter              | Value      |
| Title                  | mx1c-104-1 |
| Author                 |            |
| Solvent                | CDCl3      |
| Spectrometer Frequency | 125.70     |
| Nucleus                | 13C        |

— 166.86      — 154.69      — 142.53  
— 139.11      — 132.81      — 131.12  
— 129.53      — 128.98      — 127.46      — 120.92

— 90.54      — 77.41  
— 77.16      — 76.91      — 73.98

— 51.99      — 36.54

— 3.93

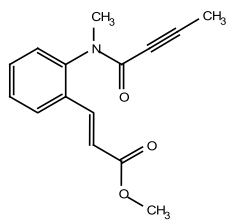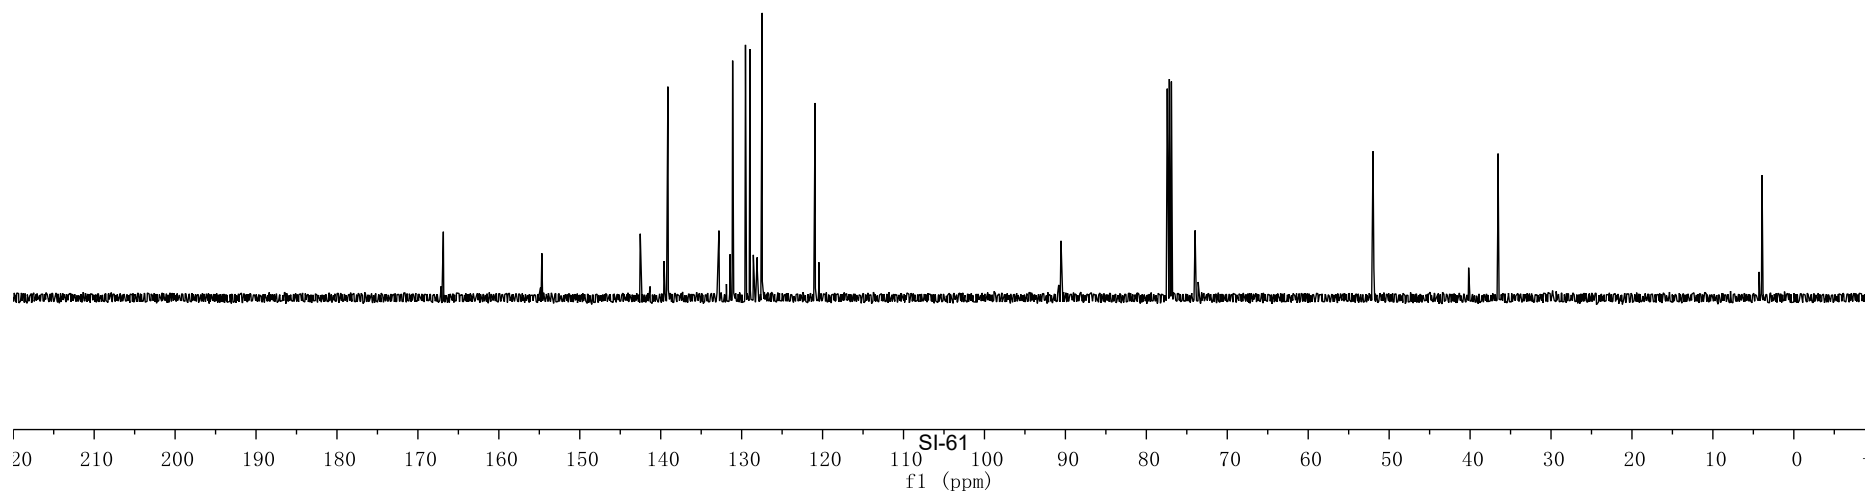

mx1h-101-22

| Parameter              | Value       |
|------------------------|-------------|
| Title                  | mx1h-101-22 |
| Author                 | vnmr1       |
| Solvent                | CDCl3       |
| Spectrometer Frequency | 499.86      |
| Nucleus                | 1H          |

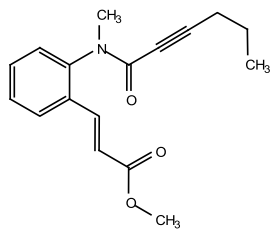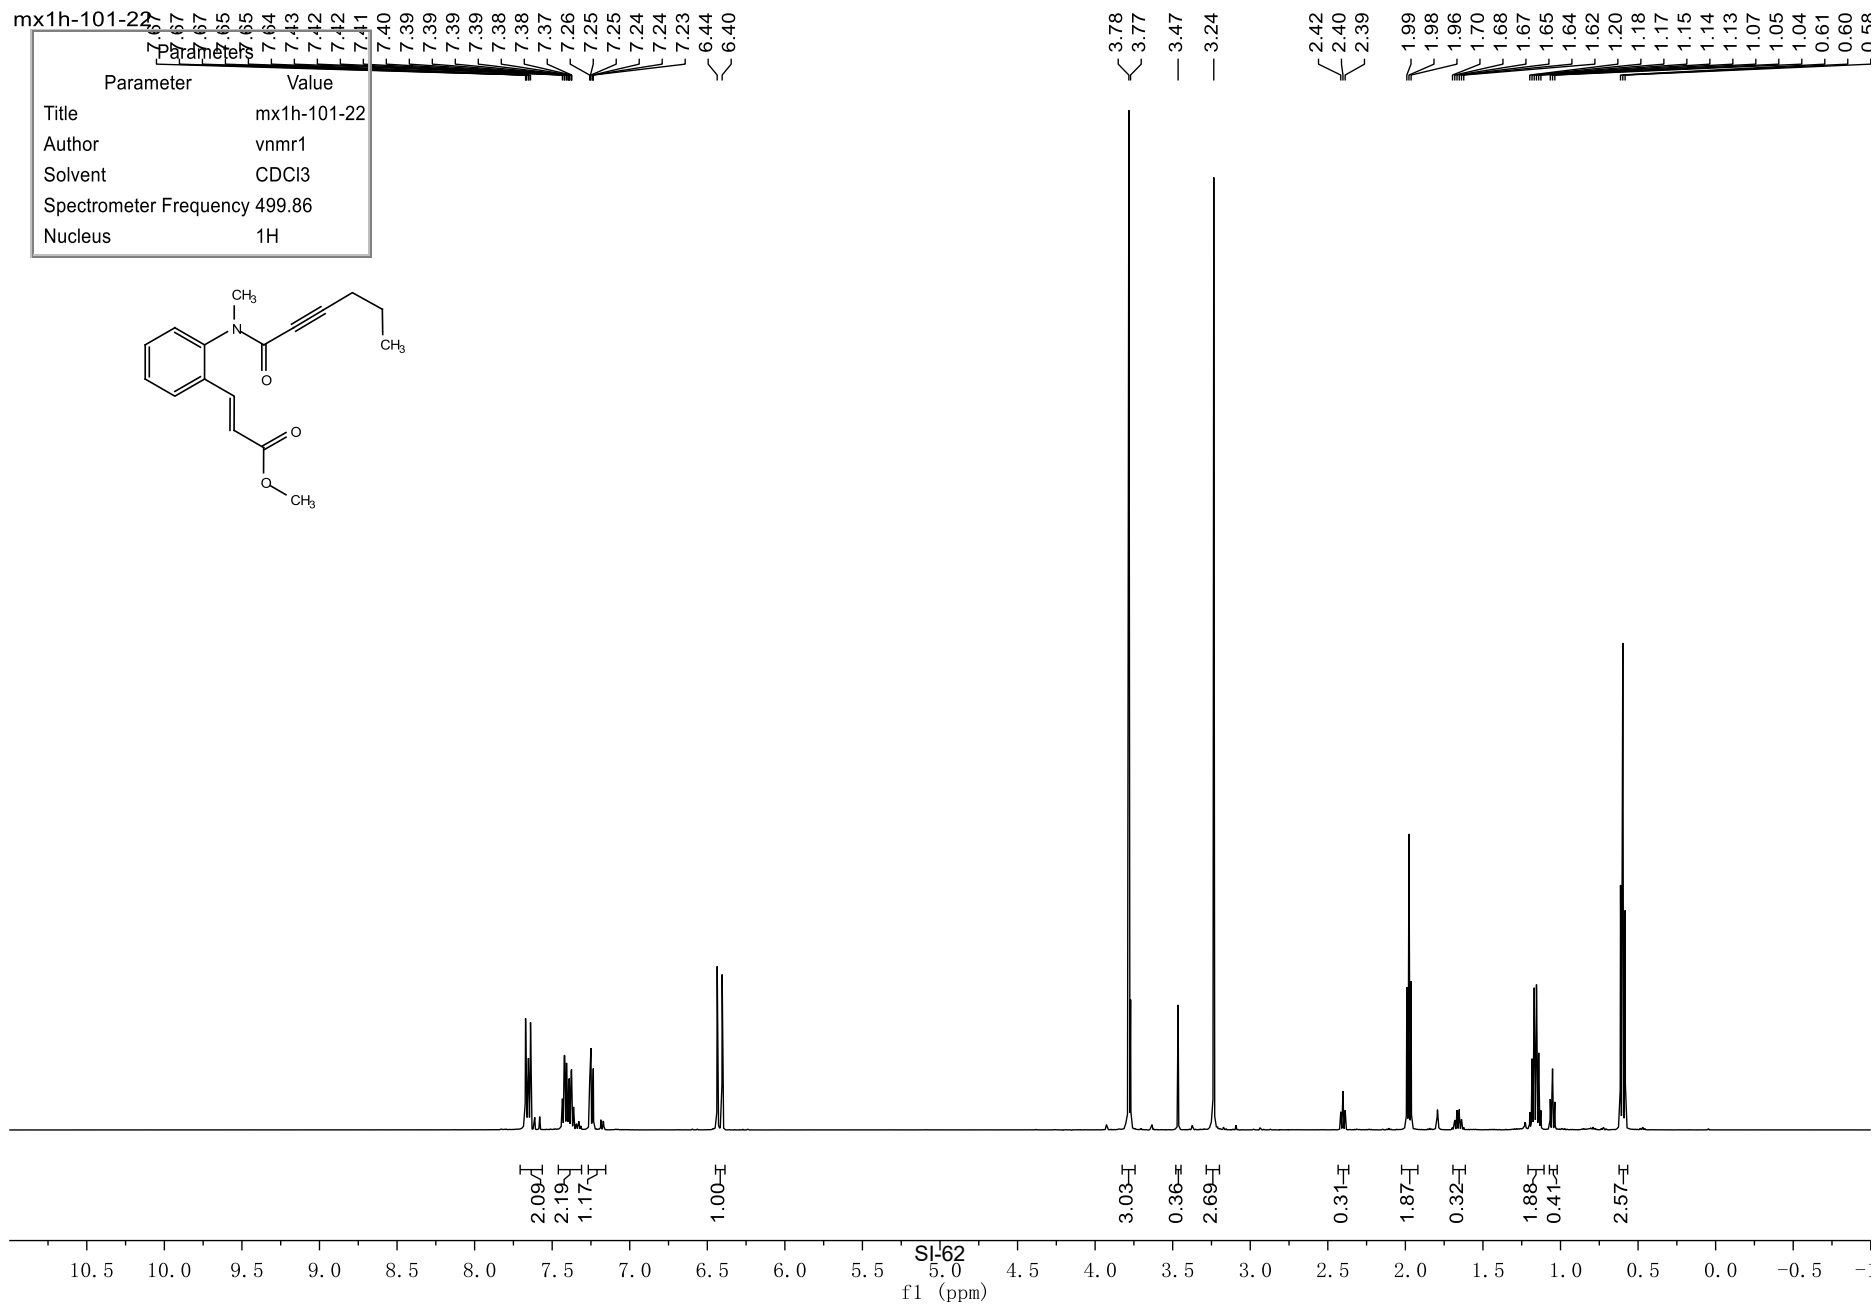

mx1c-101-23

| Parameters             |             |
|------------------------|-------------|
| Parameter              | Value       |
| Title                  | mx1c-101-23 |
| Author                 |             |
| Solvent                | CDCl3       |
| Spectrometer Frequency | 125.70      |
| Nucleus                | 13C         |

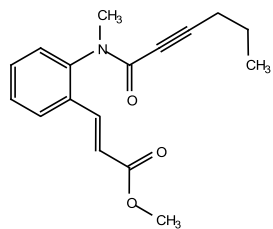

166.81  
154.72  
142.67  
139.08  
132.90  
131.10  
129.55  
128.93  
127.37  
120.89  
94.55  
77.42  
77.16  
76.91  
74.93  
51.95  
51.95  
36.42  
20.96  
20.68  
13.11

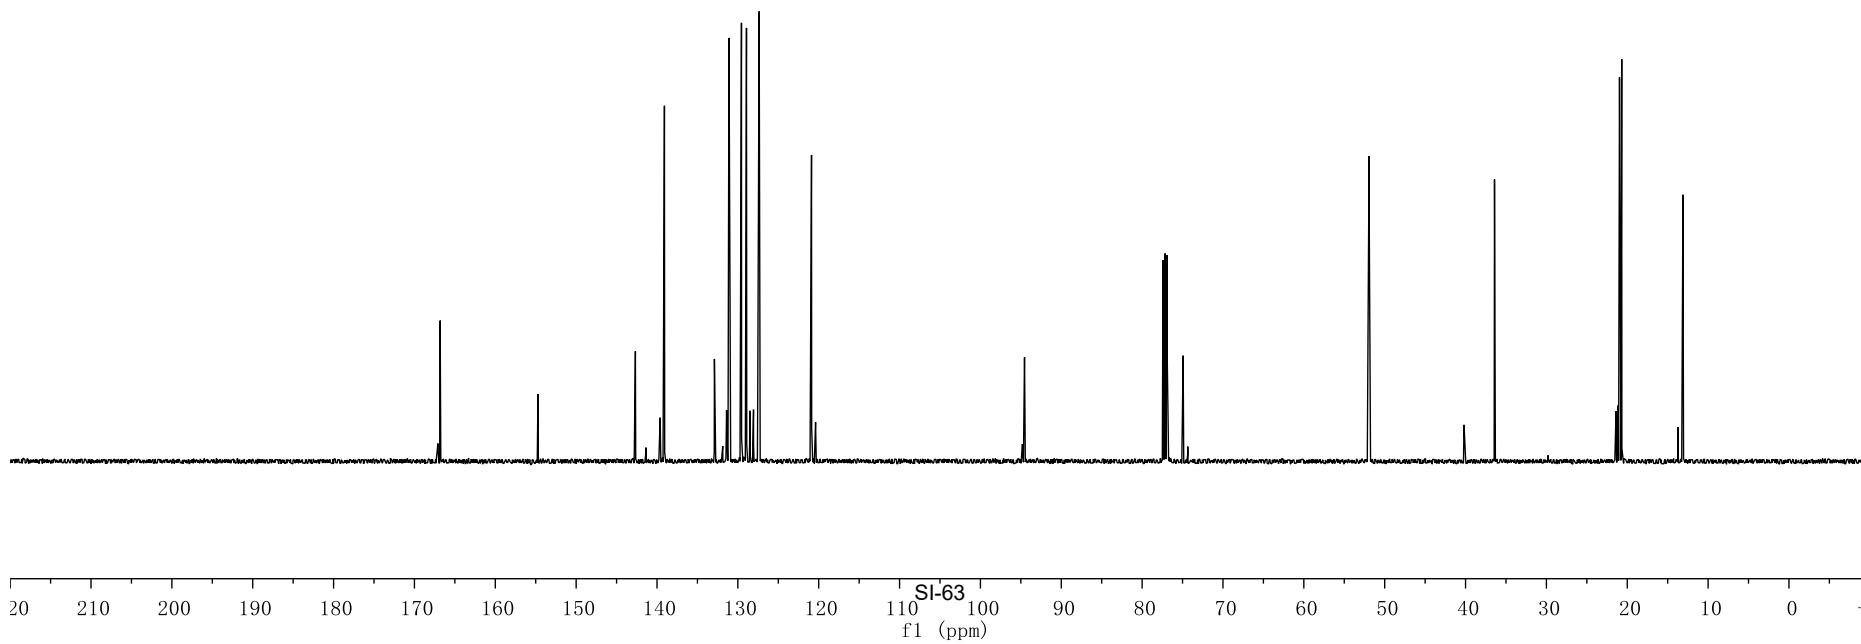

mx4h-207A-P

| Parameter              | Value       |
|------------------------|-------------|
| Title                  | mx4h-207A-P |
| Author                 | vnmr1       |
| Solvent                | cdcl3       |
| Spectrometer Frequency | 499.85      |
| Nucleus                | 1H          |

7.69  
7.68  
7.68  
7.67  
7.66  
7.66  
7.43  
7.43  
7.42  
7.41  
7.41  
7.41  
7.39  
7.39  
7.27  
7.27  
7.25  
7.25  
6.46  
6.43

3.81  
3.79  
3.48  
3.41  
3.39  
3.38  
3.25  
2.60  
2.58  
2.57  
2.17  
2.15  
2.14  
1.89  
1.89  
1.88  
1.87  
1.86  
1.37  
1.36  
1.36  
1.35  
1.23  
1.08  
1.07  
1.01  
1.00  
1.00  
0.99  
0.98

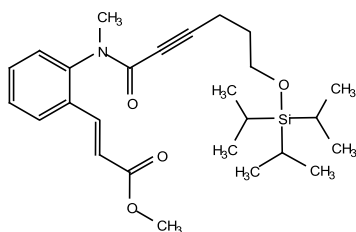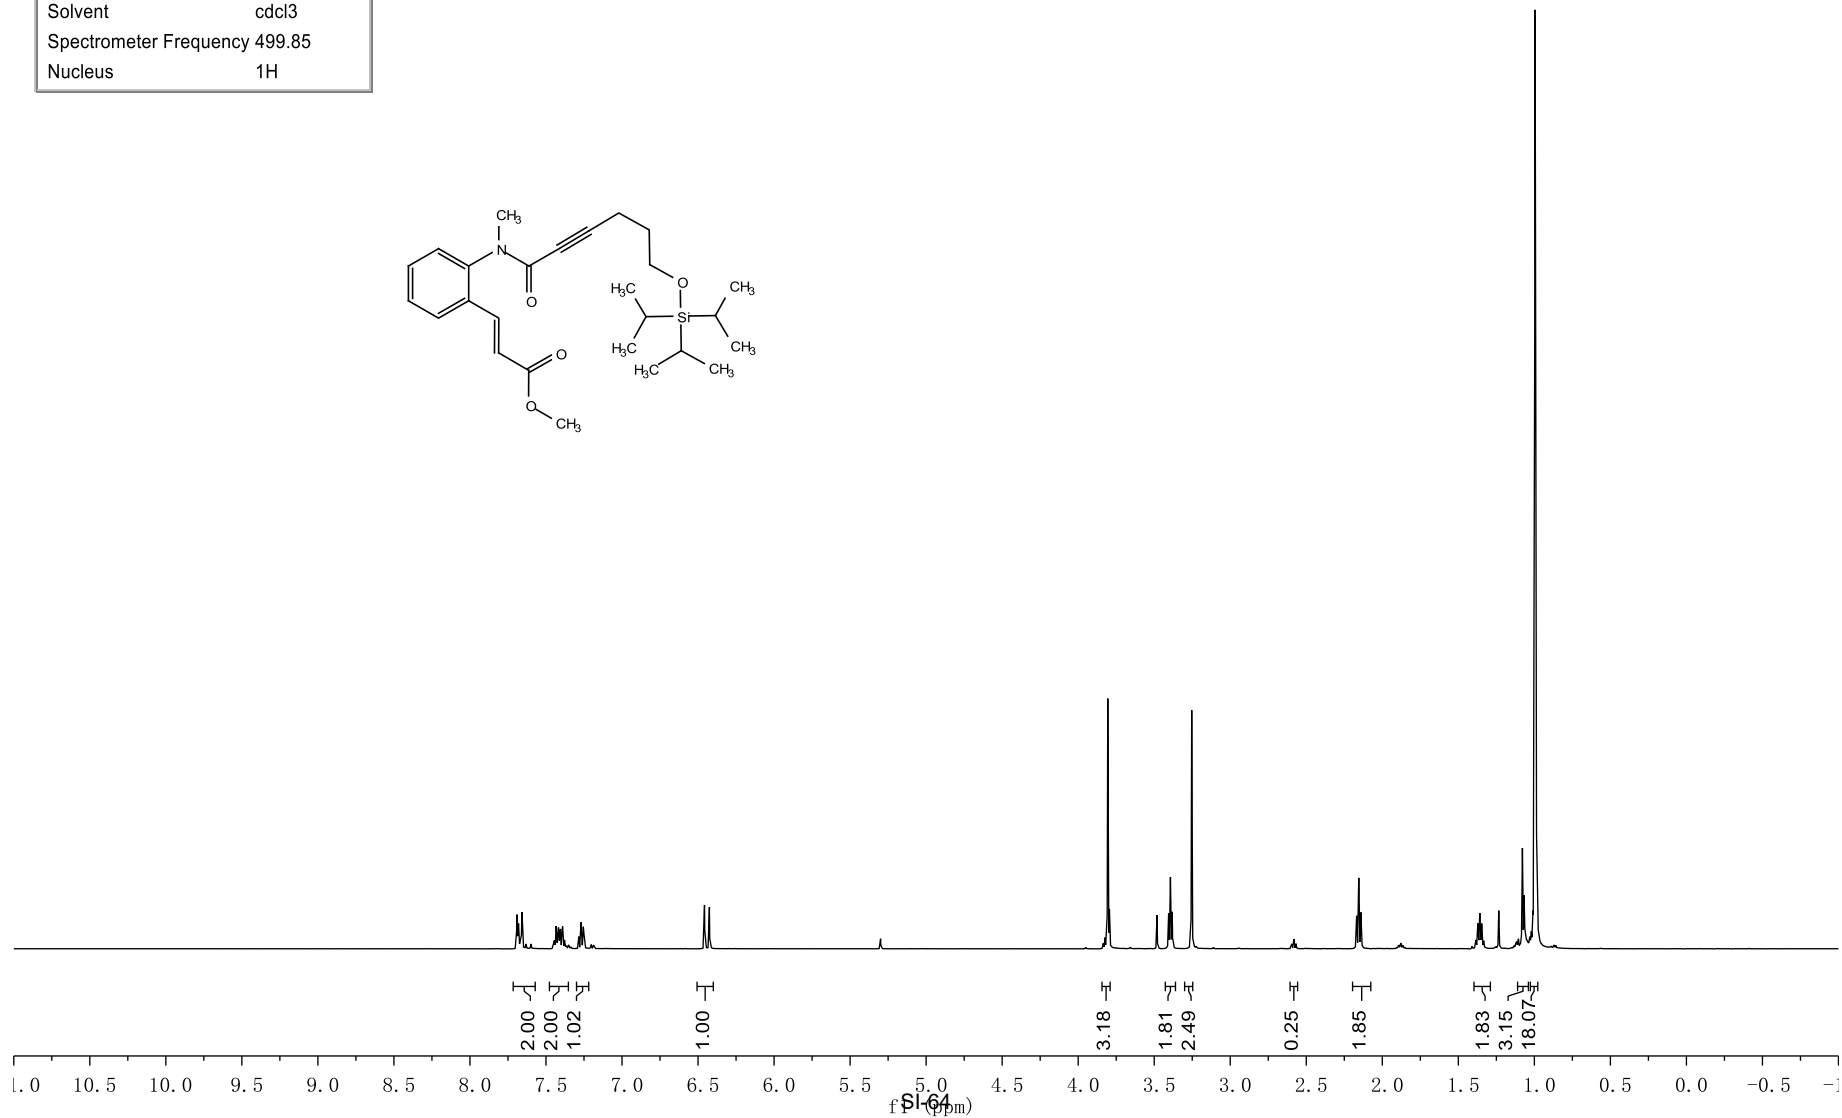



mx4c-207A-P

| Parameters             |             |
|------------------------|-------------|
| Parameter              | Value       |
| Title                  | mx4c-207A-P |
| Author                 |             |
| Solvent                | cdcl3       |
| Spectrometer Frequency | 125.70      |
| Nucleus                | 13C         |

— 166.75 — 154.63 — 142.67 — 139.01 — 132.84 — 131.03 — 129.59 — 128.92 — 127.32 — 120.89 — 94.58 — 77.41 — 77.16 — 76.91 — 74.68 — 61.26 — 51.94 — 36.42 — 31.00 — 18.10 — 18.03 — 18.02 — 15.17 — 11.96

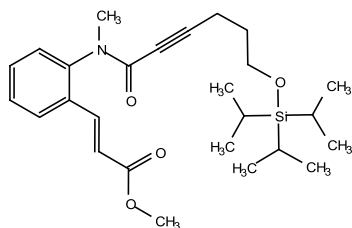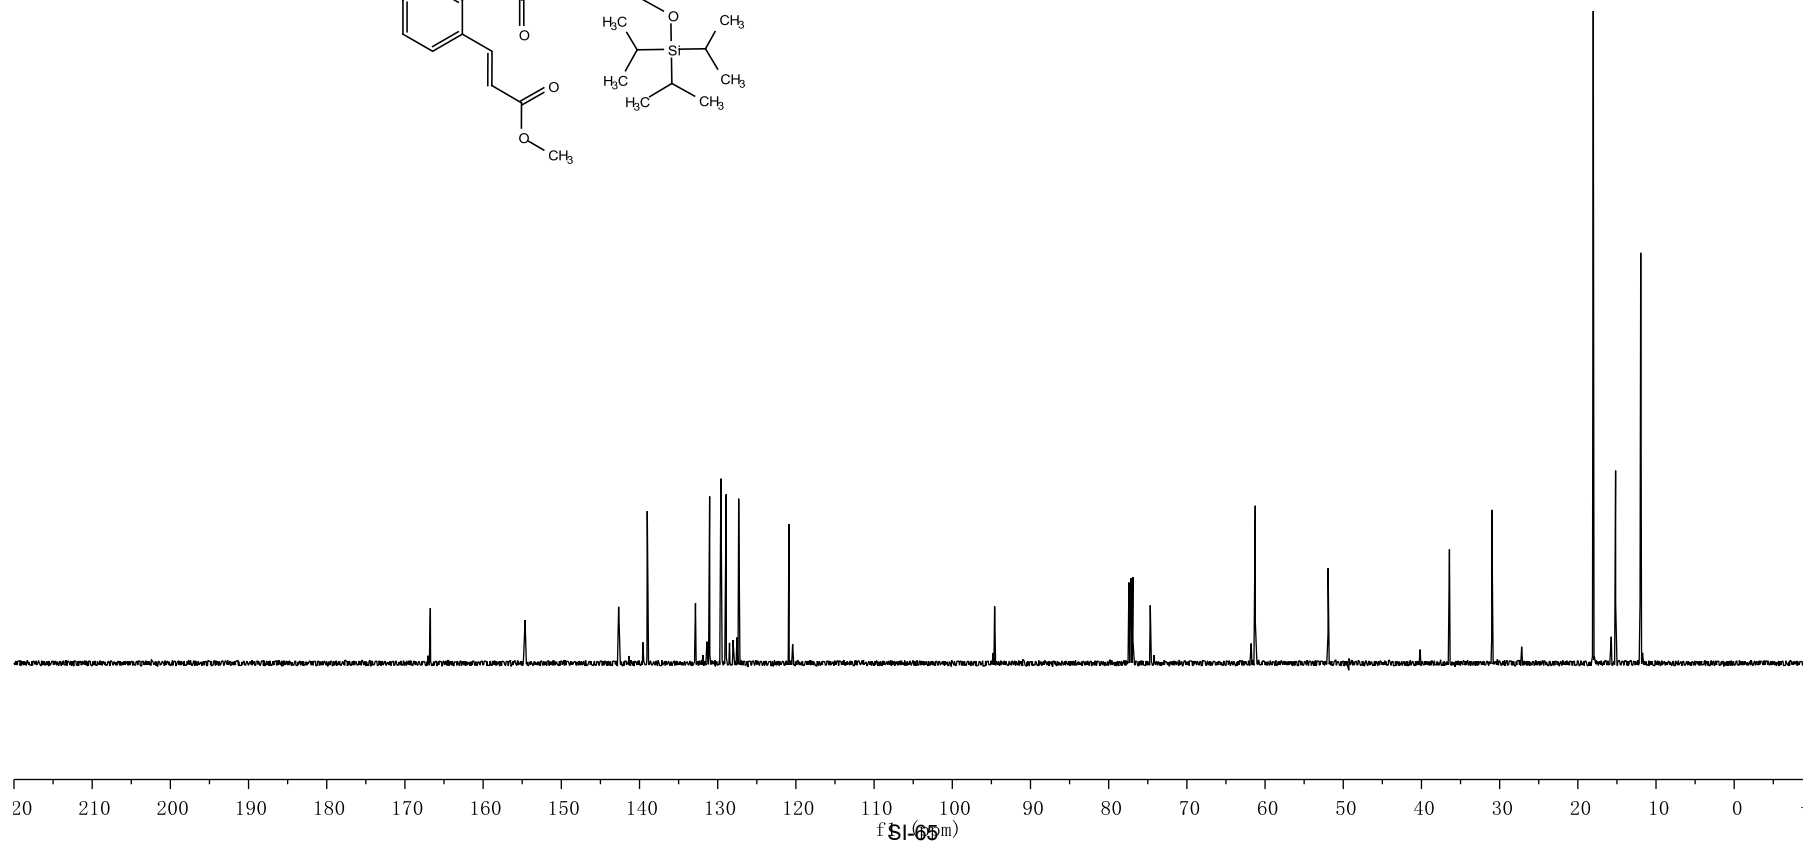

xg-2-222A-h

| Parameter                | Value       |
|--------------------------|-------------|
| 1 Title                  | xg-2-222A-h |
| 2 Solvent                | CDCl3       |
| 3 Relaxation Delay       | 4.8000      |
| 4 Spectrometer Frequency | 499.86      |
| 5 Nucleus                | 1H          |

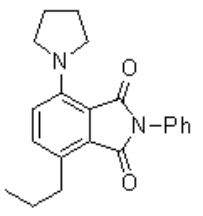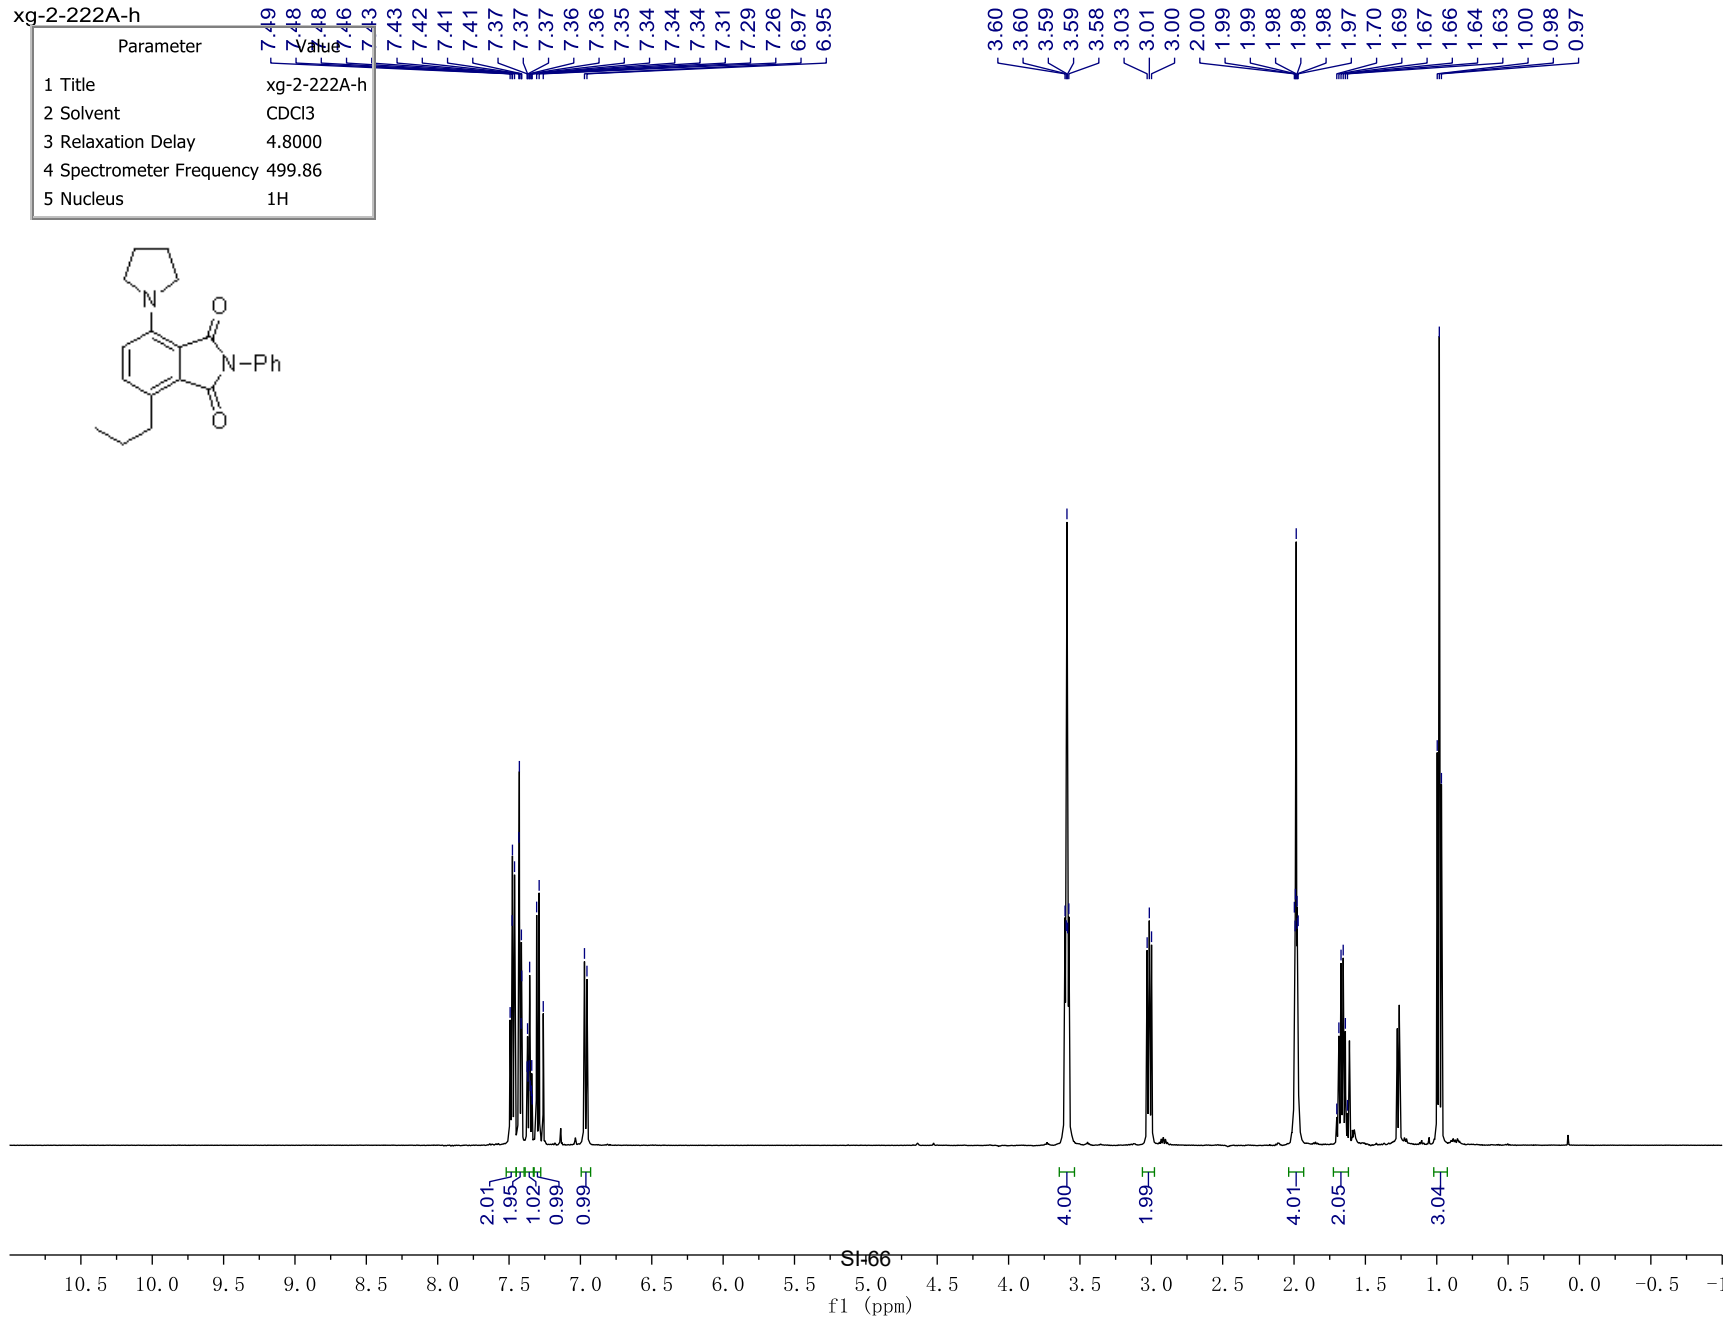

xg-2-222A-c13-2

| Parameter                | Value           |
|--------------------------|-----------------|
| 1 Title                  | xg-2-222A-c13-2 |
| 2 Solvent                | CDCl3           |
| 3 Relaxation Delay       | 1.0000          |
| 4 Spectrometer Frequency | 125.70          |
| 5 Nucleus                | 13C             |

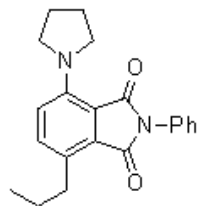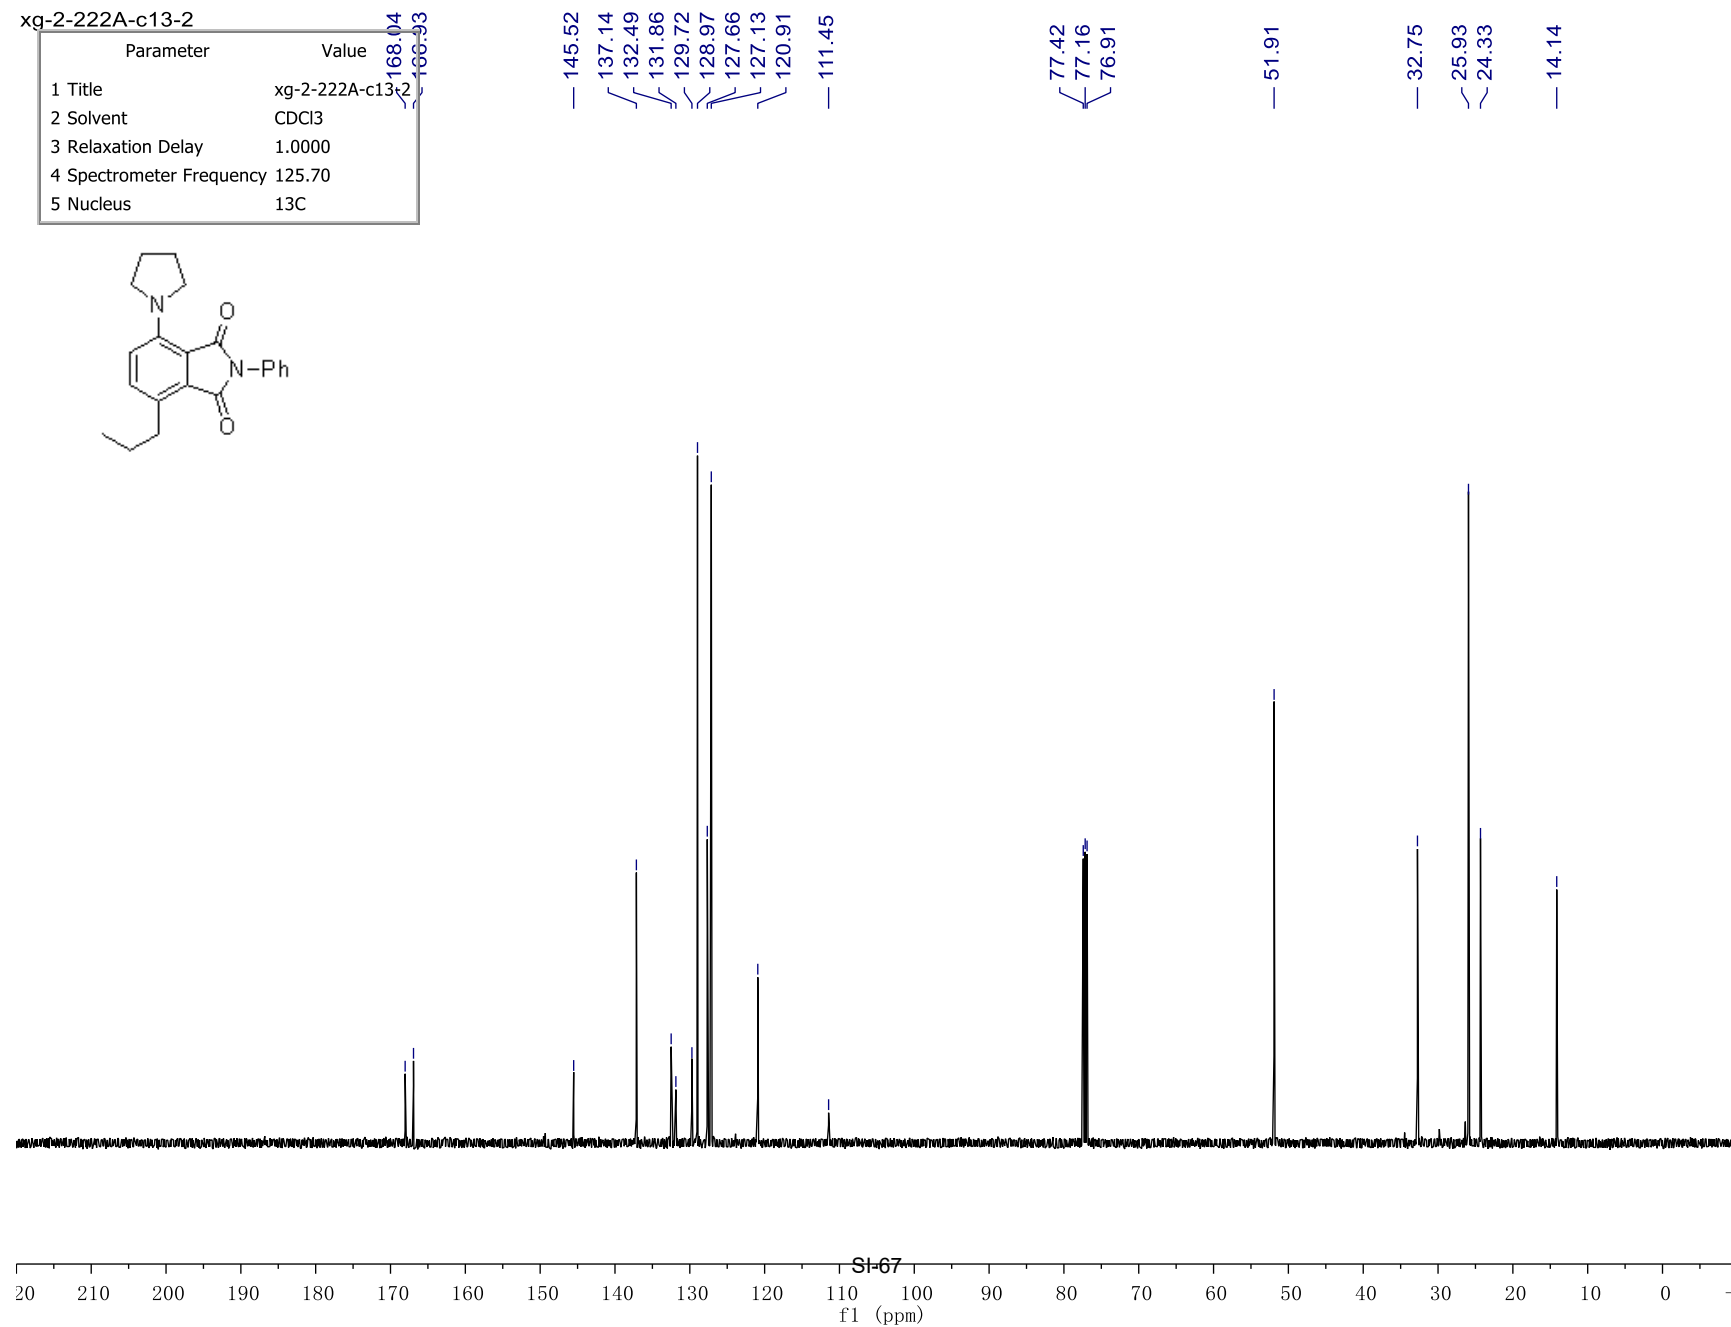

7.43  
7.45  
7.46  
7.43  
7.44  
7.43  
7.36  
7.35  
7.35  
7.34  
7.34  
7.34  
7.33  
7.33  
7.32  
7.32  
7.26  
6.40  
6.38  
6.19  
6.17

5.29  
3.90  
3.57  
3.56  
3.55  
3.54  
3.53  
2.97  
2.07  
2.07  
2.06  
2.05  
2.05  
2.04  
1.87  
1.86  
1.85  
1.84  
1.84  
1.83  
1.82  
1.81  
1.65  
1.65  
1.64  
1.64  
1.63  
1.63  
1.62  
1.61  
1.61  
1.60  
1.44  
1.43  
1.42  
1.42  
1.41  
1.41  
1.40  
1.39  
1.26  
1.26  
1.25  
1.25  
1.24  
1.24  
1.23  
0.89  
0.88  
0.86

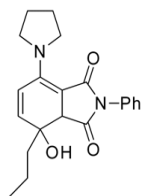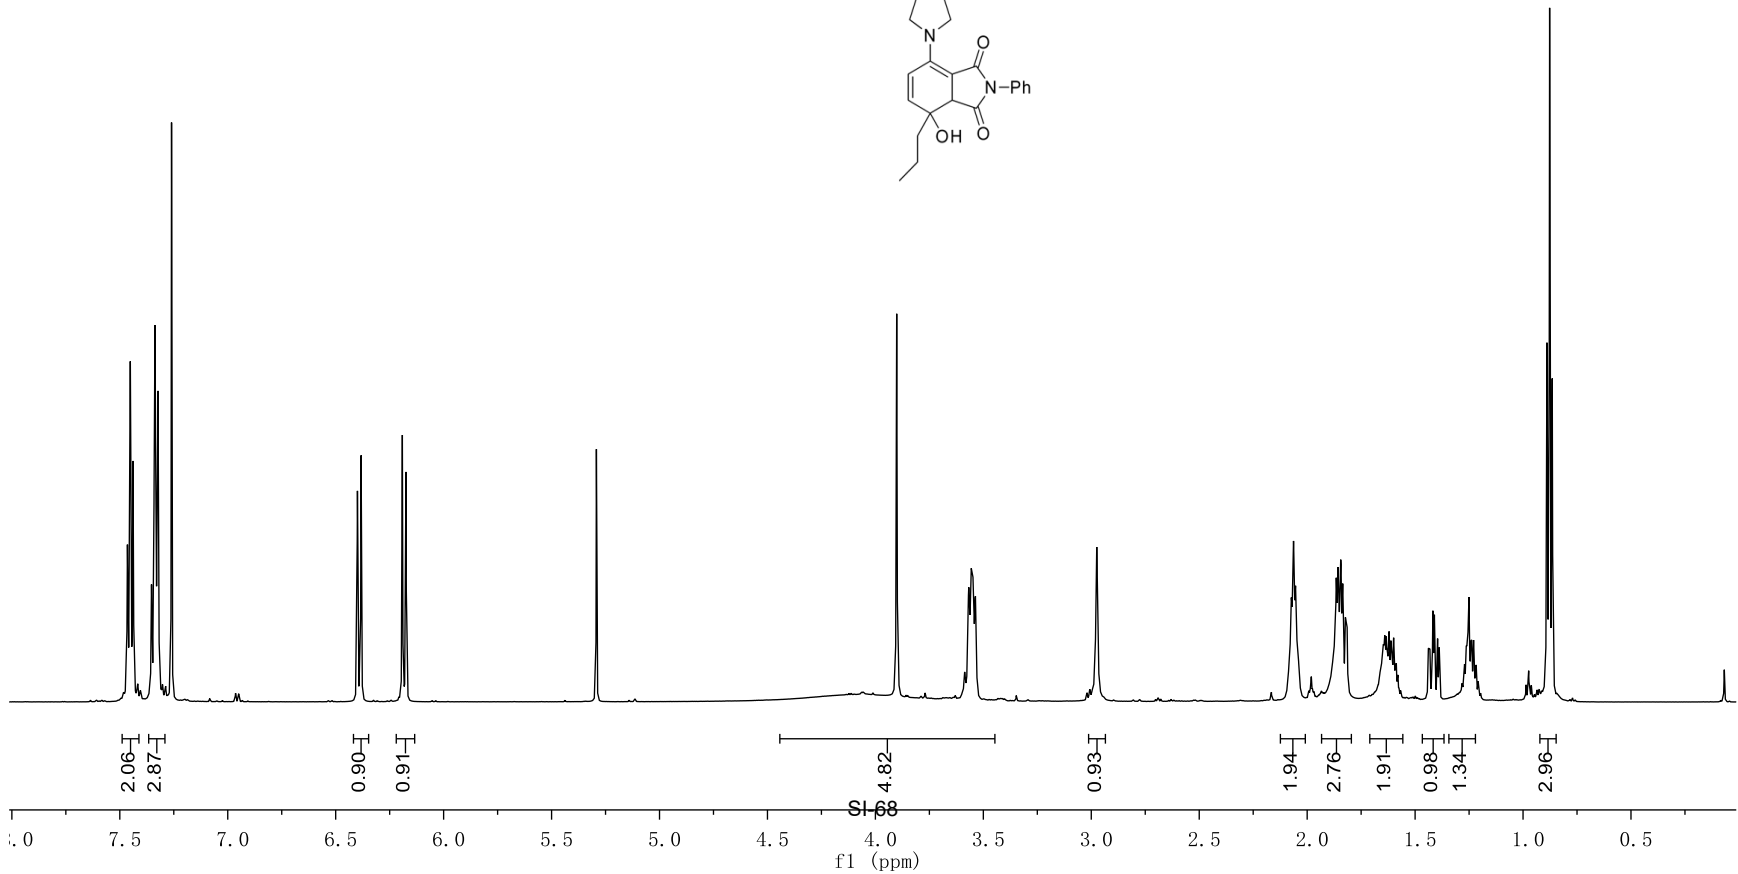

mx4c-248A-Pbottom

| Parameter              | Value             |
|------------------------|-------------------|
| Title                  | mx4c-248A-Pbottom |
| Author                 |                   |
| Solvent                | cdcl3             |
| Spectrometer Frequency | 125.70            |
| Nucleus                | 13C               |

175.34  
165.34  
148.20  
147.15  
133.04  
128.98  
128.97  
127.93  
127.13  
127.01  
121.16

83.92  
77.41  
77.16  
76.91  
74.66

53.66  
51.90

36.49

25.93  
25.63

16.57  
14.73

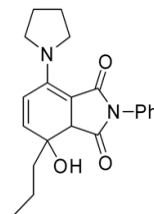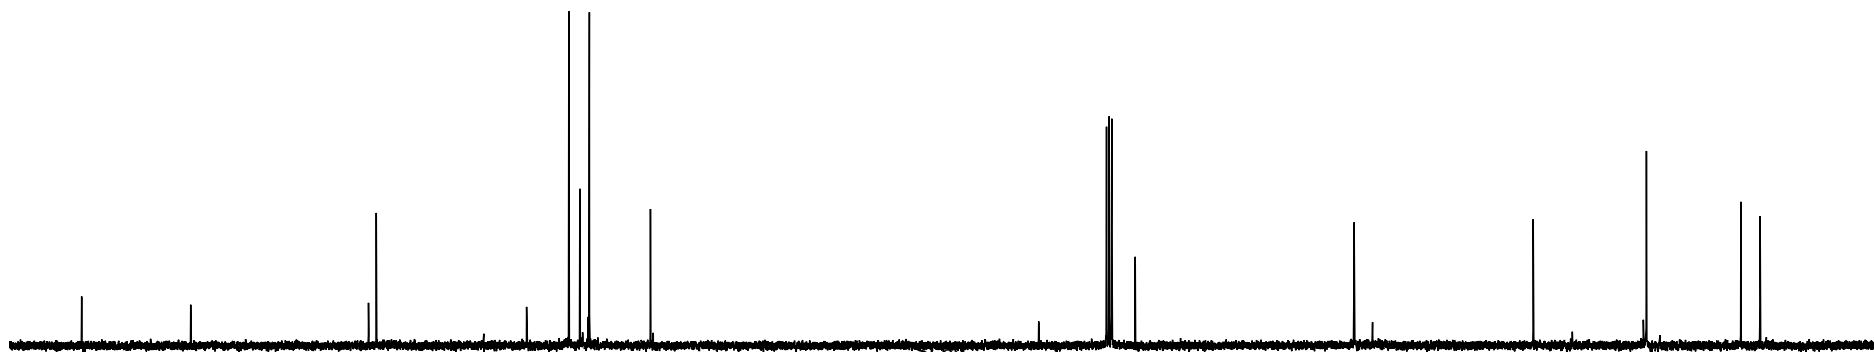

xg-2-213B-h

| Parameter                | Value       |
|--------------------------|-------------|
| 1 Title                  | xg-2-213B-h |
| 2 Solvent                | cdcl3       |
| 3 Relaxation Delay       | 4.8000      |
| 4 Spectrometer Frequency | 399.78      |
| 5 Nucleus                | 1H          |

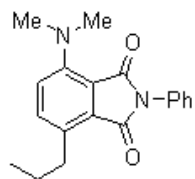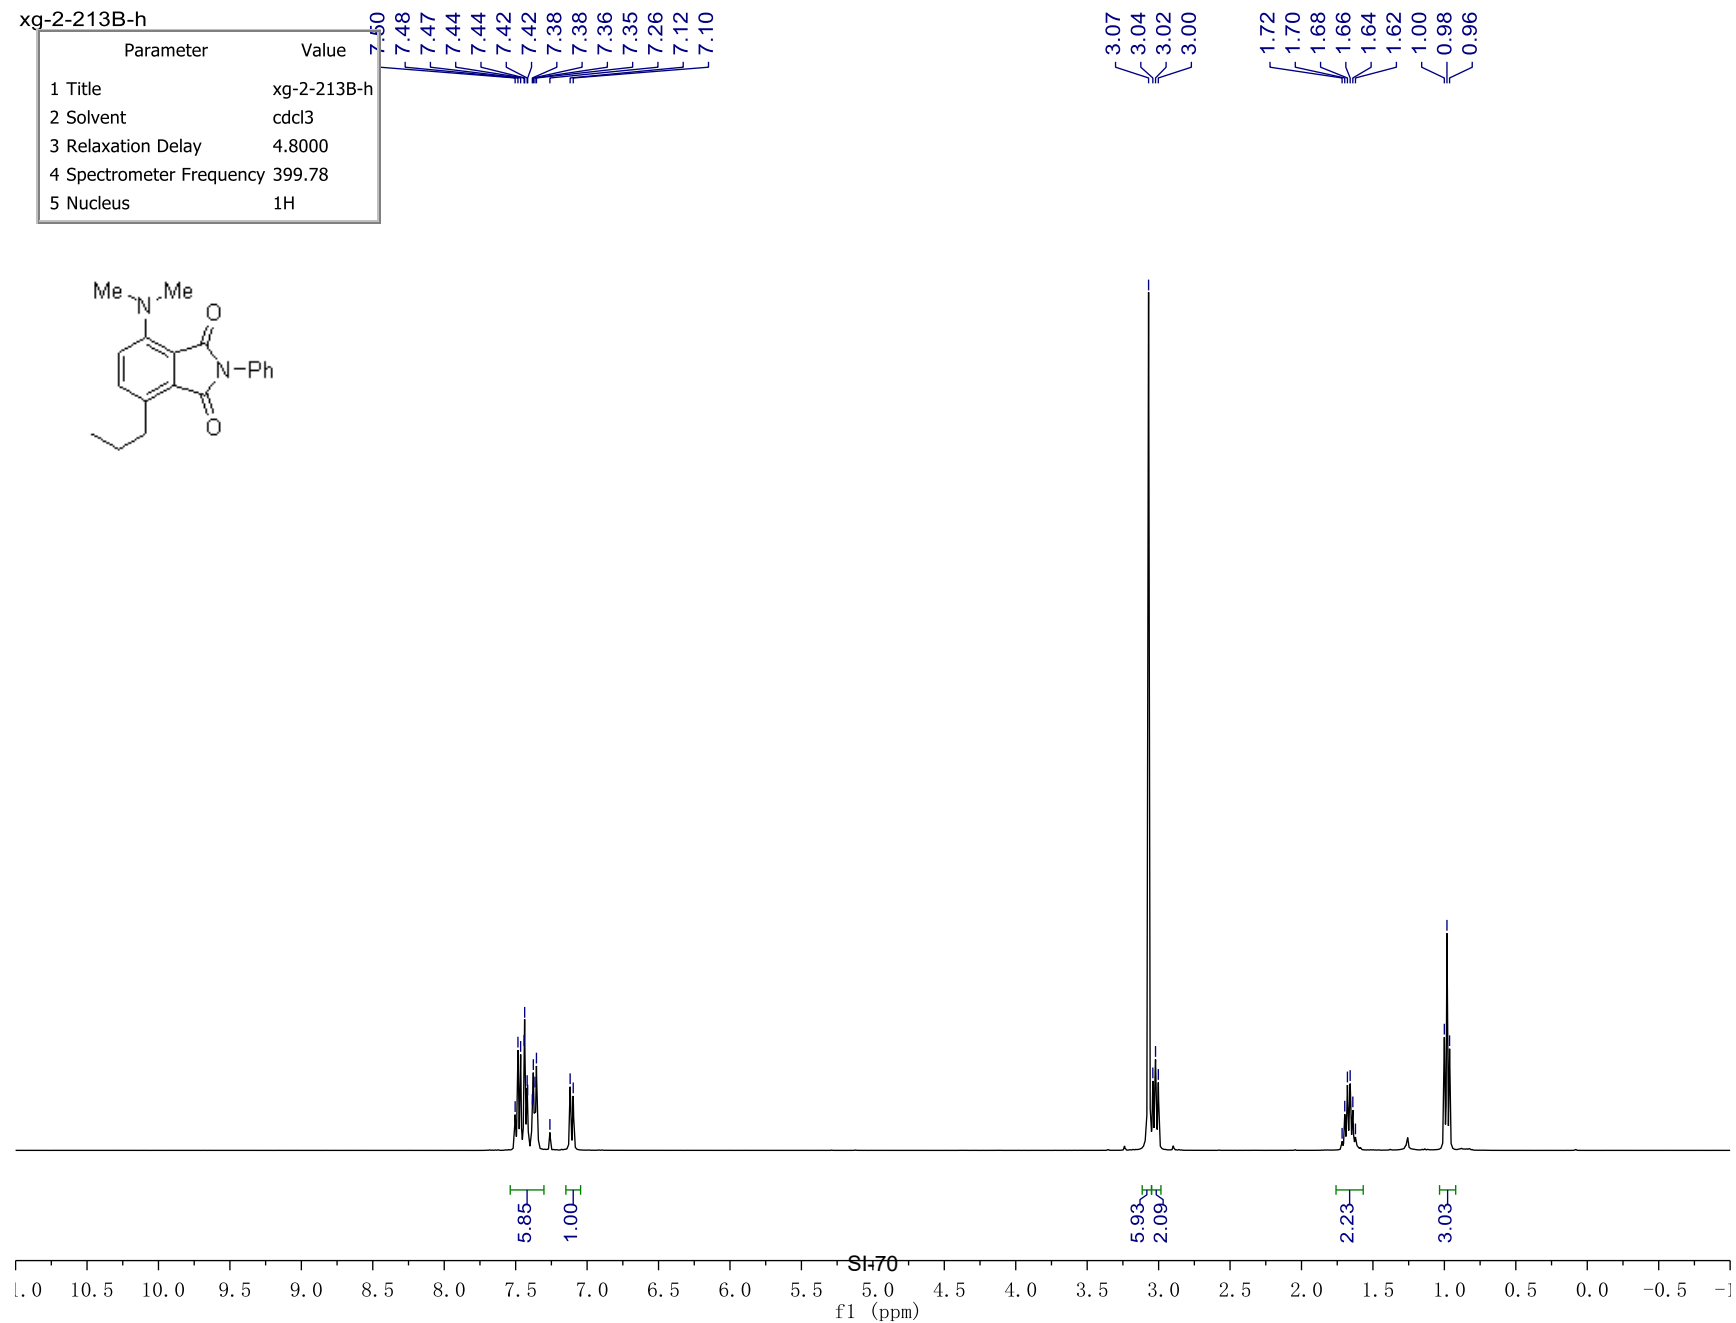

xg-2-213B-c13

| Parameter                | Value         |
|--------------------------|---------------|
| 1 Title                  | xg-2-213B-c13 |
| 2 Solvent                | cdcl3         |
| 3 Relaxation Delay       | 1.0000        |
| 4 Spectrometer Frequency | 100.53        |
| 5 Nucleus                | 13C           |

167.92  
166.57

149.40  
137.36  
133.98  
132.16  
129.73  
129.00  
127.76  
126.95  
122.65  
115.76

77.48  
77.15  
76.84

43.75

32.80

24.27

14.11

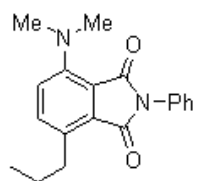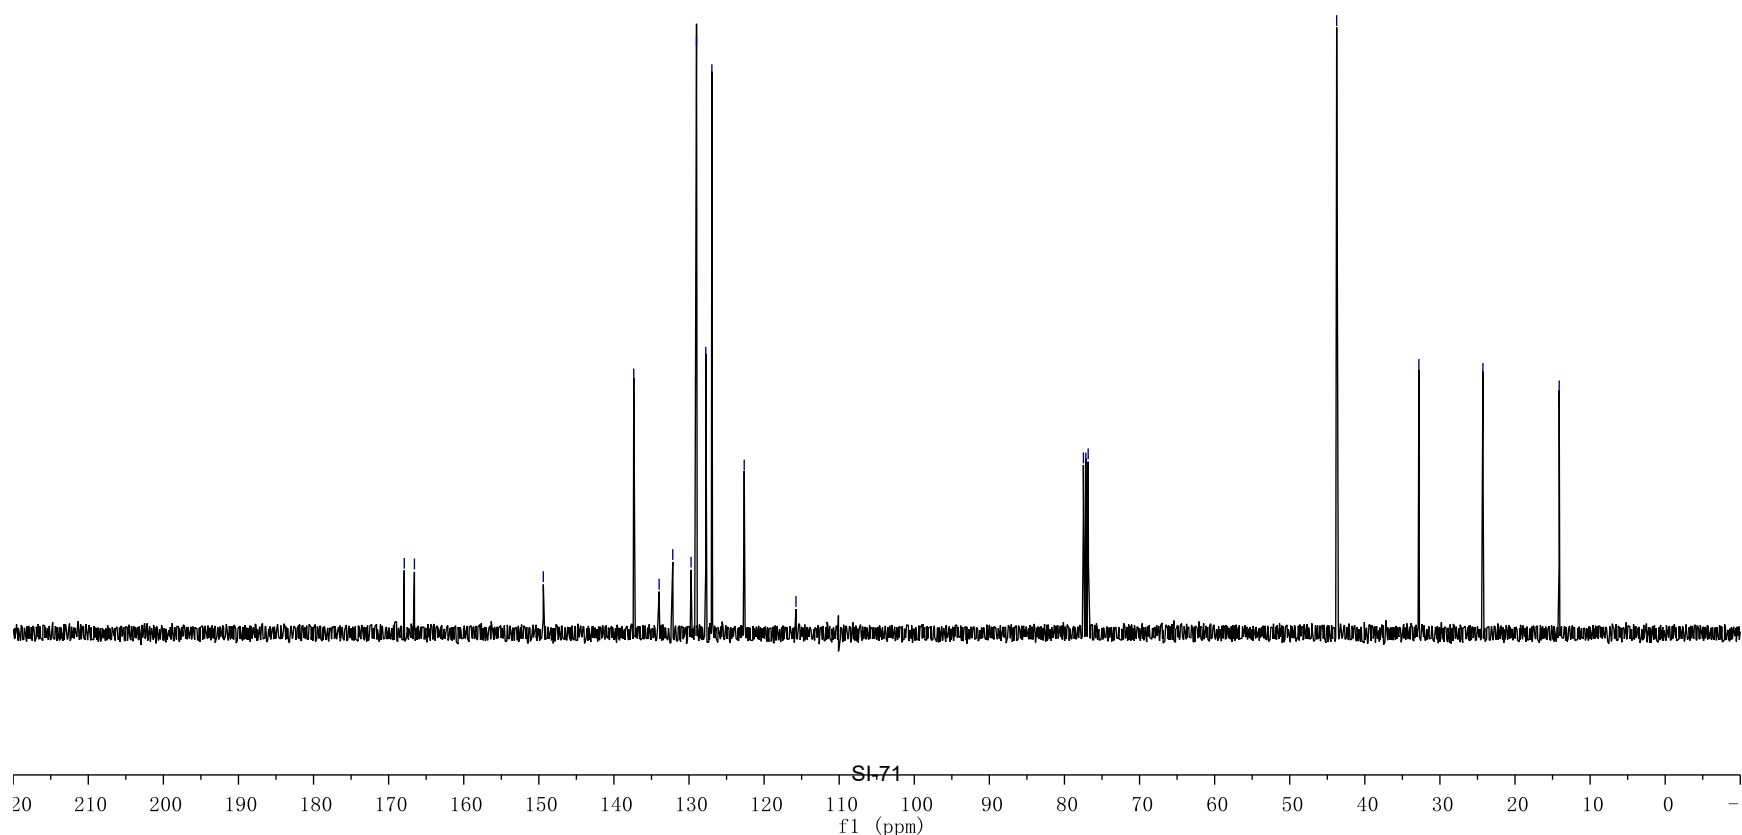

xg-2-222B-h

| Parameter                | Value       |
|--------------------------|-------------|
| 1 Title                  | xg-2-222B-h |
| 2 Solvent                | CDCl3       |
| 3 Relaxation Delay       | 4.8000      |
| 4 Spectrometer Frequency | 499.86      |
| 5 Nucleus                | 1H          |

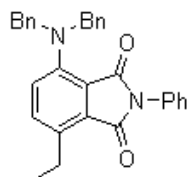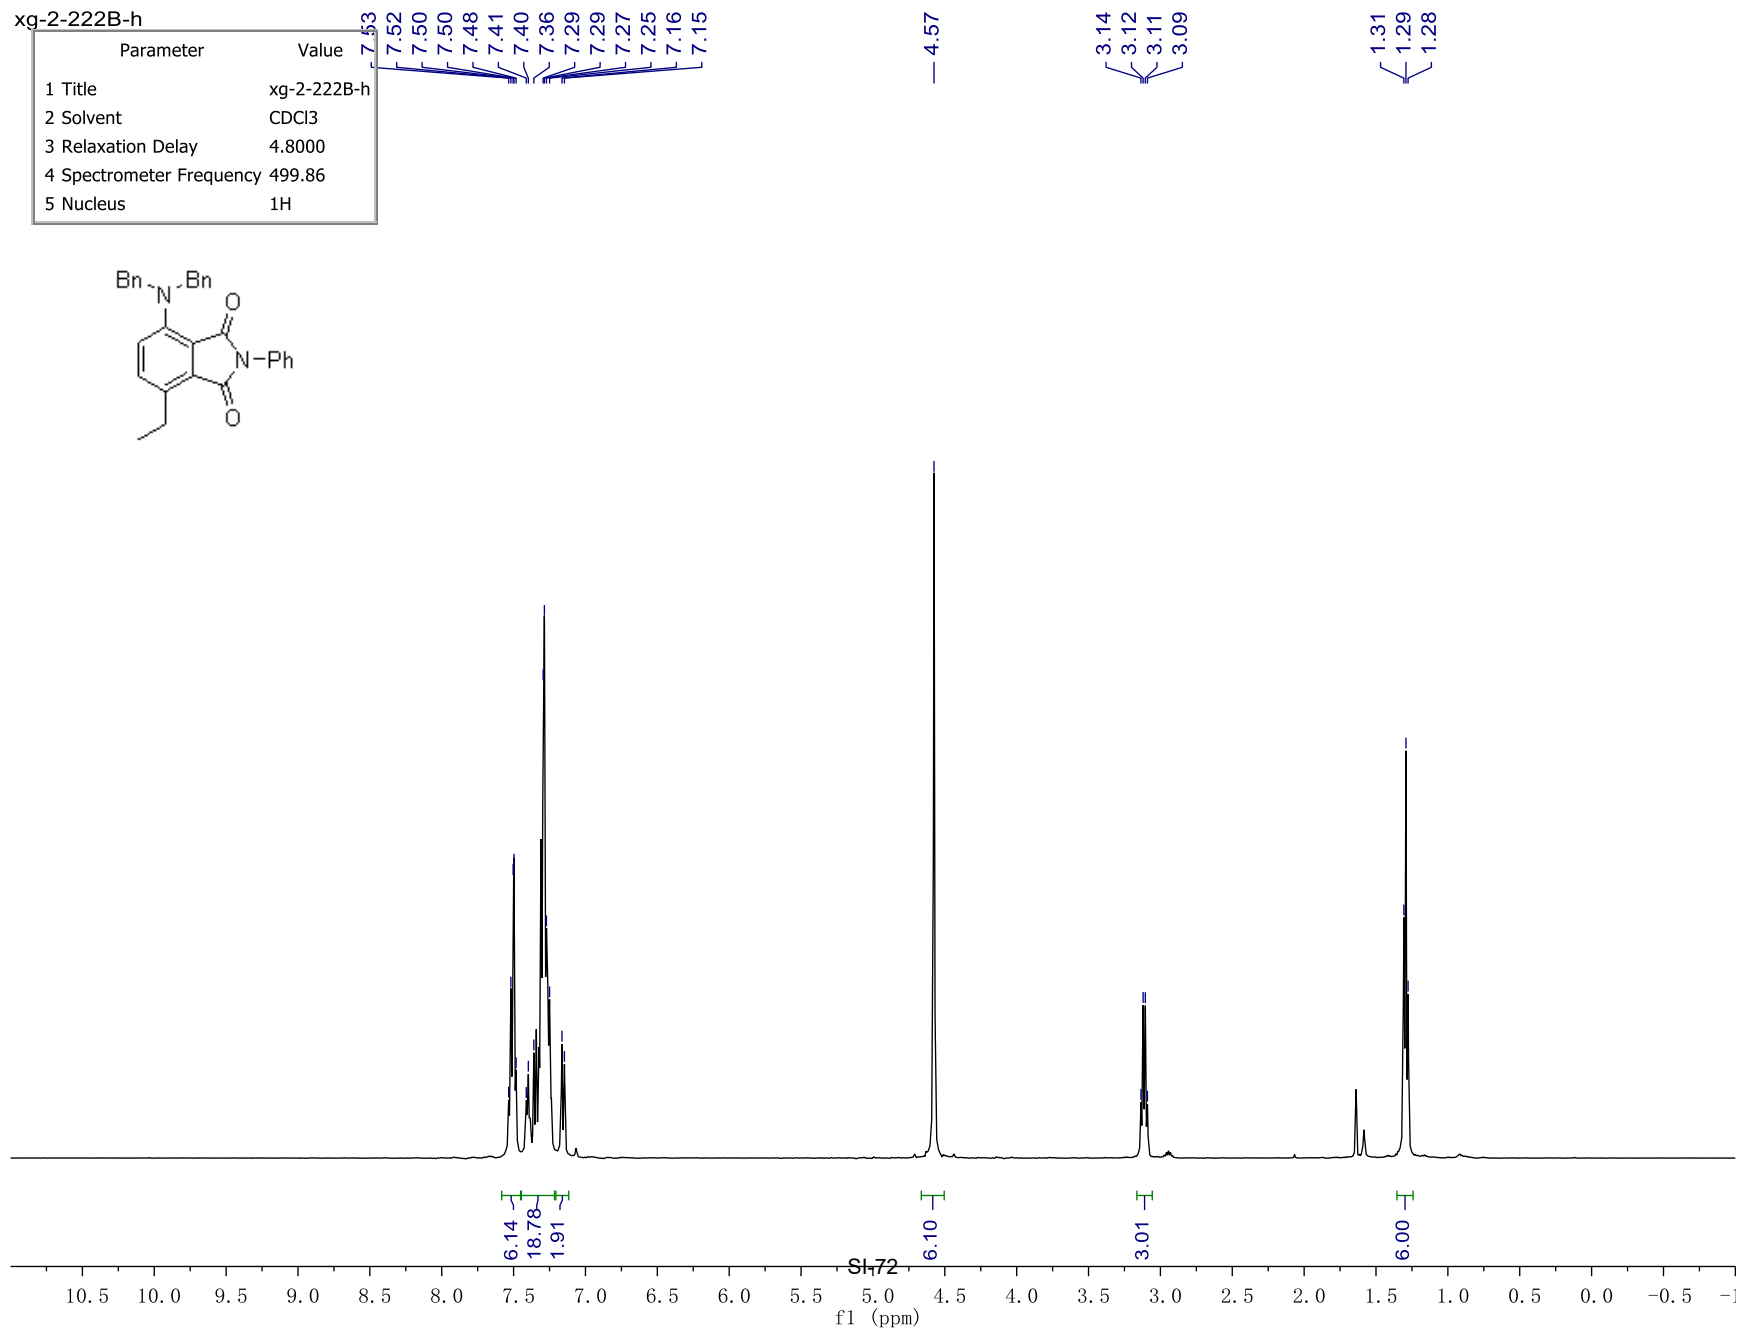



xg-2-222B-c13

| Parameter                | Value         |
|--------------------------|---------------|
| 1 Title                  | xg-2-222B-c13 |
| 2 Solvent                | CDCl3         |
| 3 Relaxation Delay       | 1.0000        |
| 4 Spectrometer Frequency | 125.70        |
| 5 Nucleus                | 13C           |

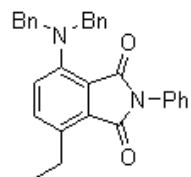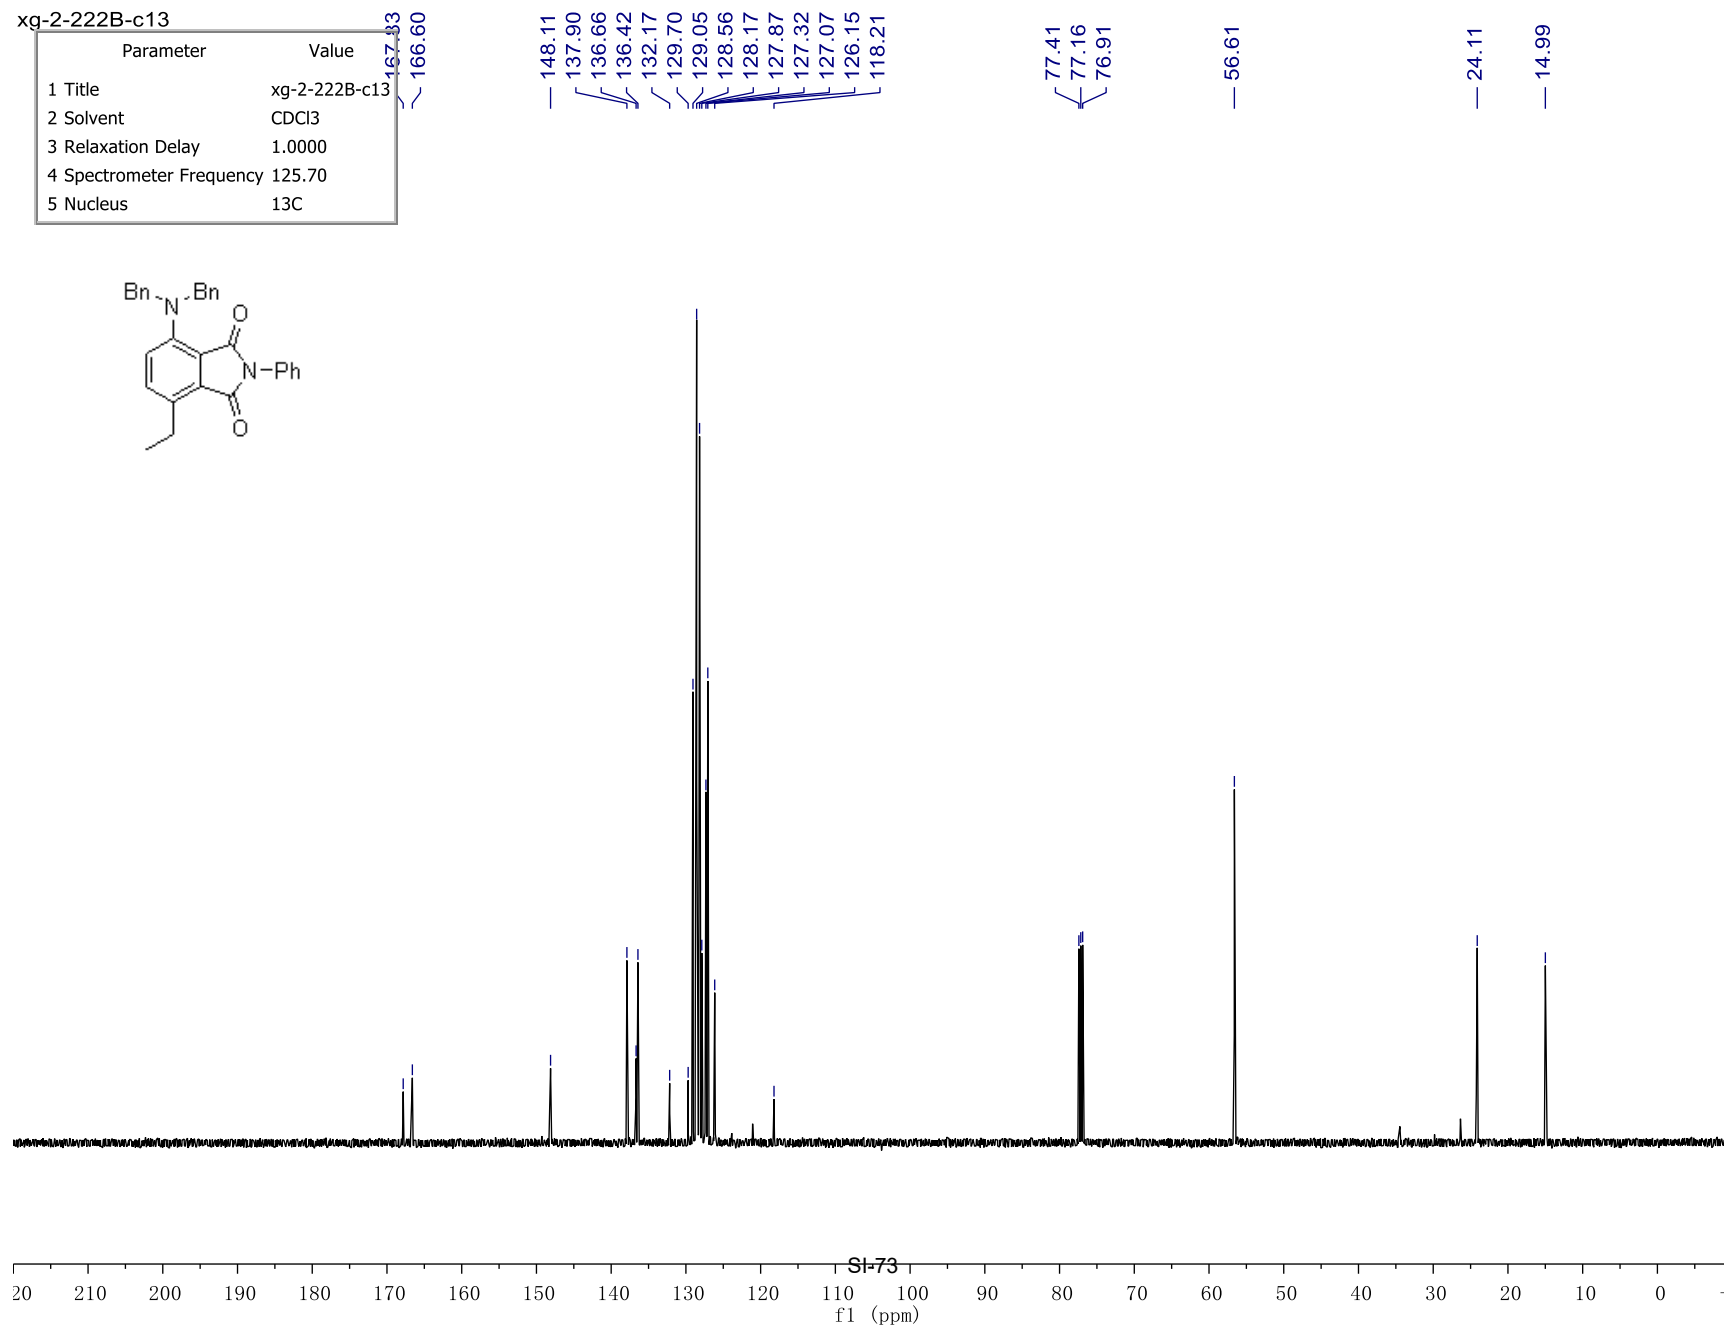

SI-73

xg-2-213CC-h

| Parameter                | Value        |
|--------------------------|--------------|
| 1 Title                  | xg-2-213CC-h |
| 2 Solvent                | cdcl3        |
| 3 Relaxation Delay       | 4.8000       |
| 4 Spectrometer Frequency | 399.78       |
| 5 Nucleus                | 1H           |

7.50  
7.48  
7.46  
7.42  
7.41  
7.40  
7.38  
7.36  
7.35  
7.26  
7.16  
7.14

3.25  
3.24  
3.23  
3.05  
3.03  
3.01  
1.83  
1.82  
1.80  
1.79  
1.78  
1.70  
1.68  
1.66  
1.64  
1.62  
1.61  
1.61  
1.00  
0.98  
0.96

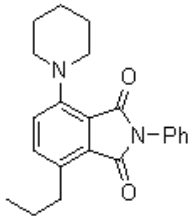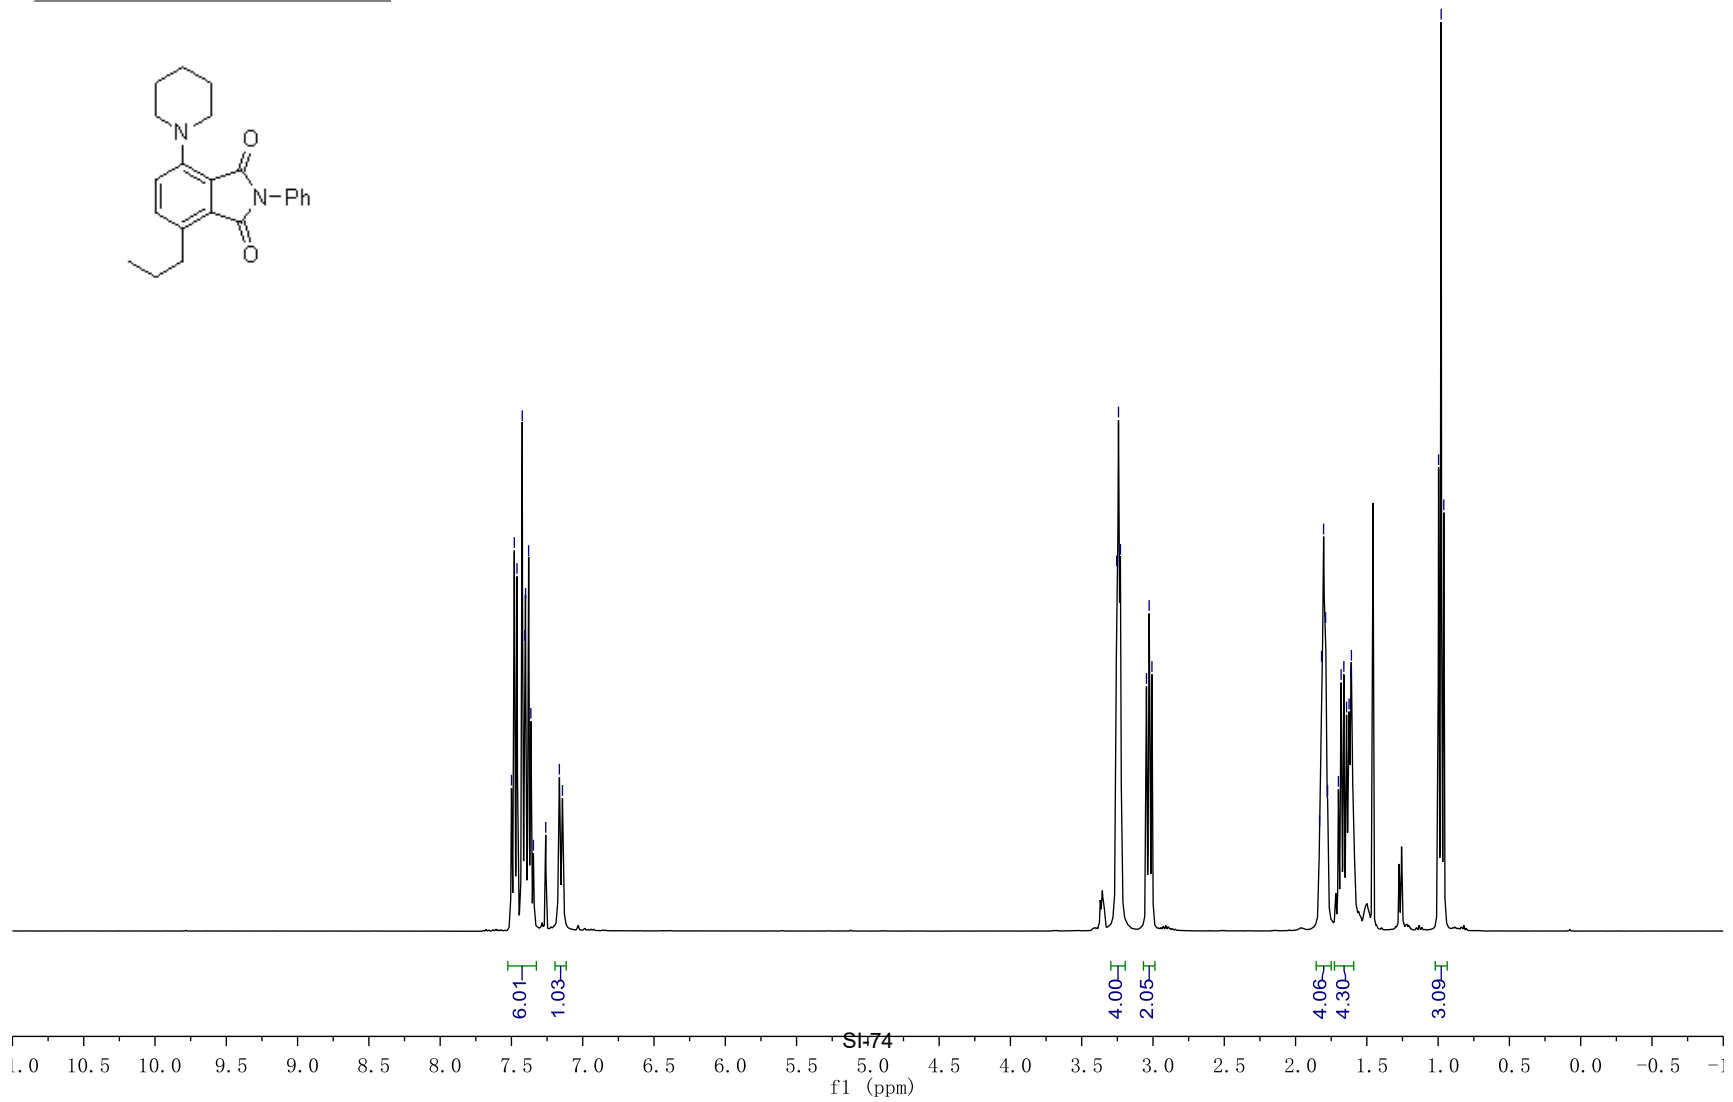

xg-2-213CC-c13

| Parameter                | Value          |
|--------------------------|----------------|
| 1 Title                  | xg-2-213CC-c13 |
| 2 Solvent                | cdcl3          |
| 3 Relaxation Delay       | 1.0000         |
| 4 Spectrometer Frequency | 100.53         |
| 5 Nucleus                | 13C            |

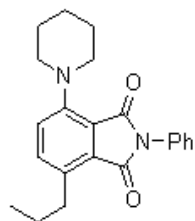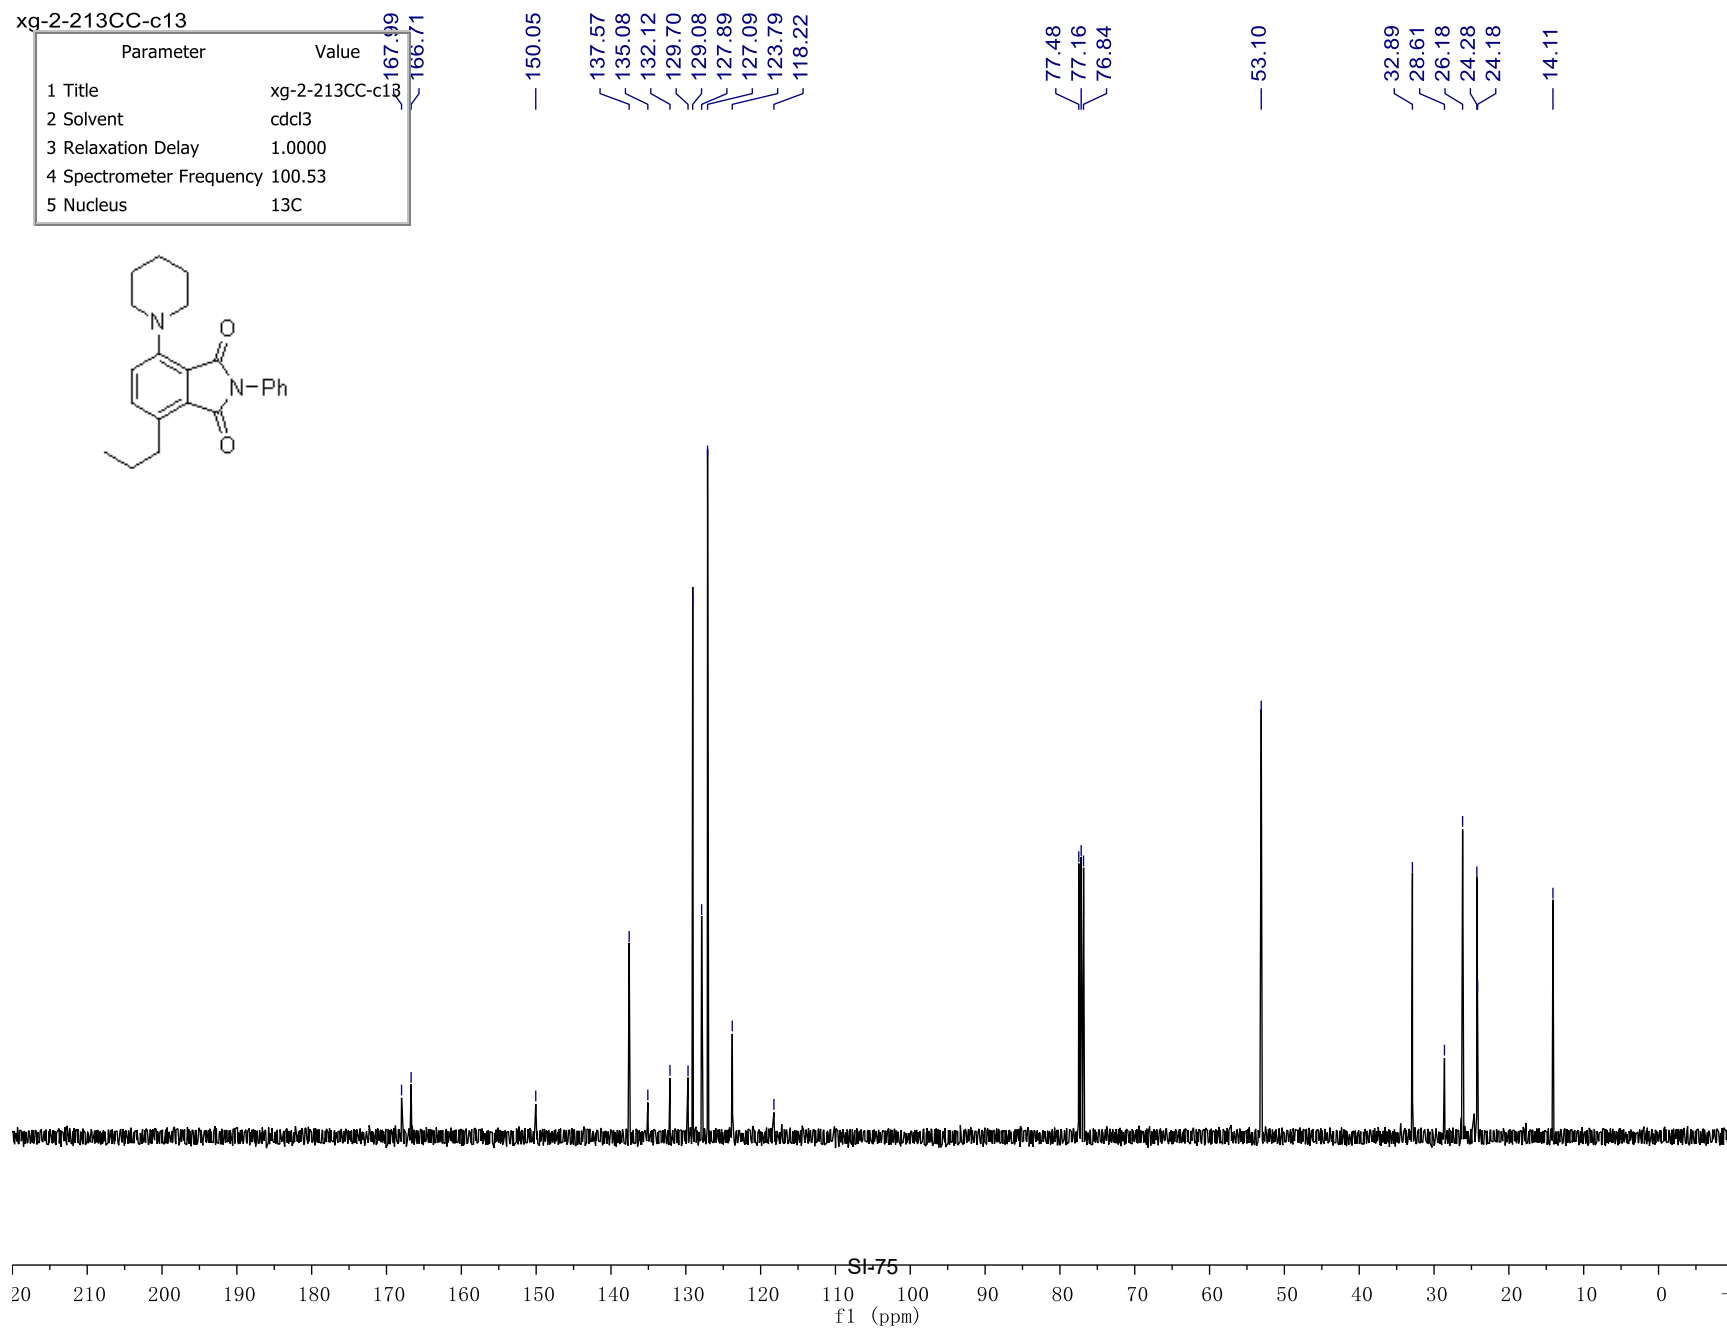

xg-2-213DD-h

| Parameter                | Value        |
|--------------------------|--------------|
| 1 Title                  | xg-2-213DD-h |
| 2 Solvent                | cdcl3        |
| 3 Relaxation Delay       | 4.8000       |
| 4 Spectrometer Frequency | 399.78       |
| 5 Nucleus                | 1H           |

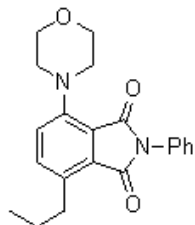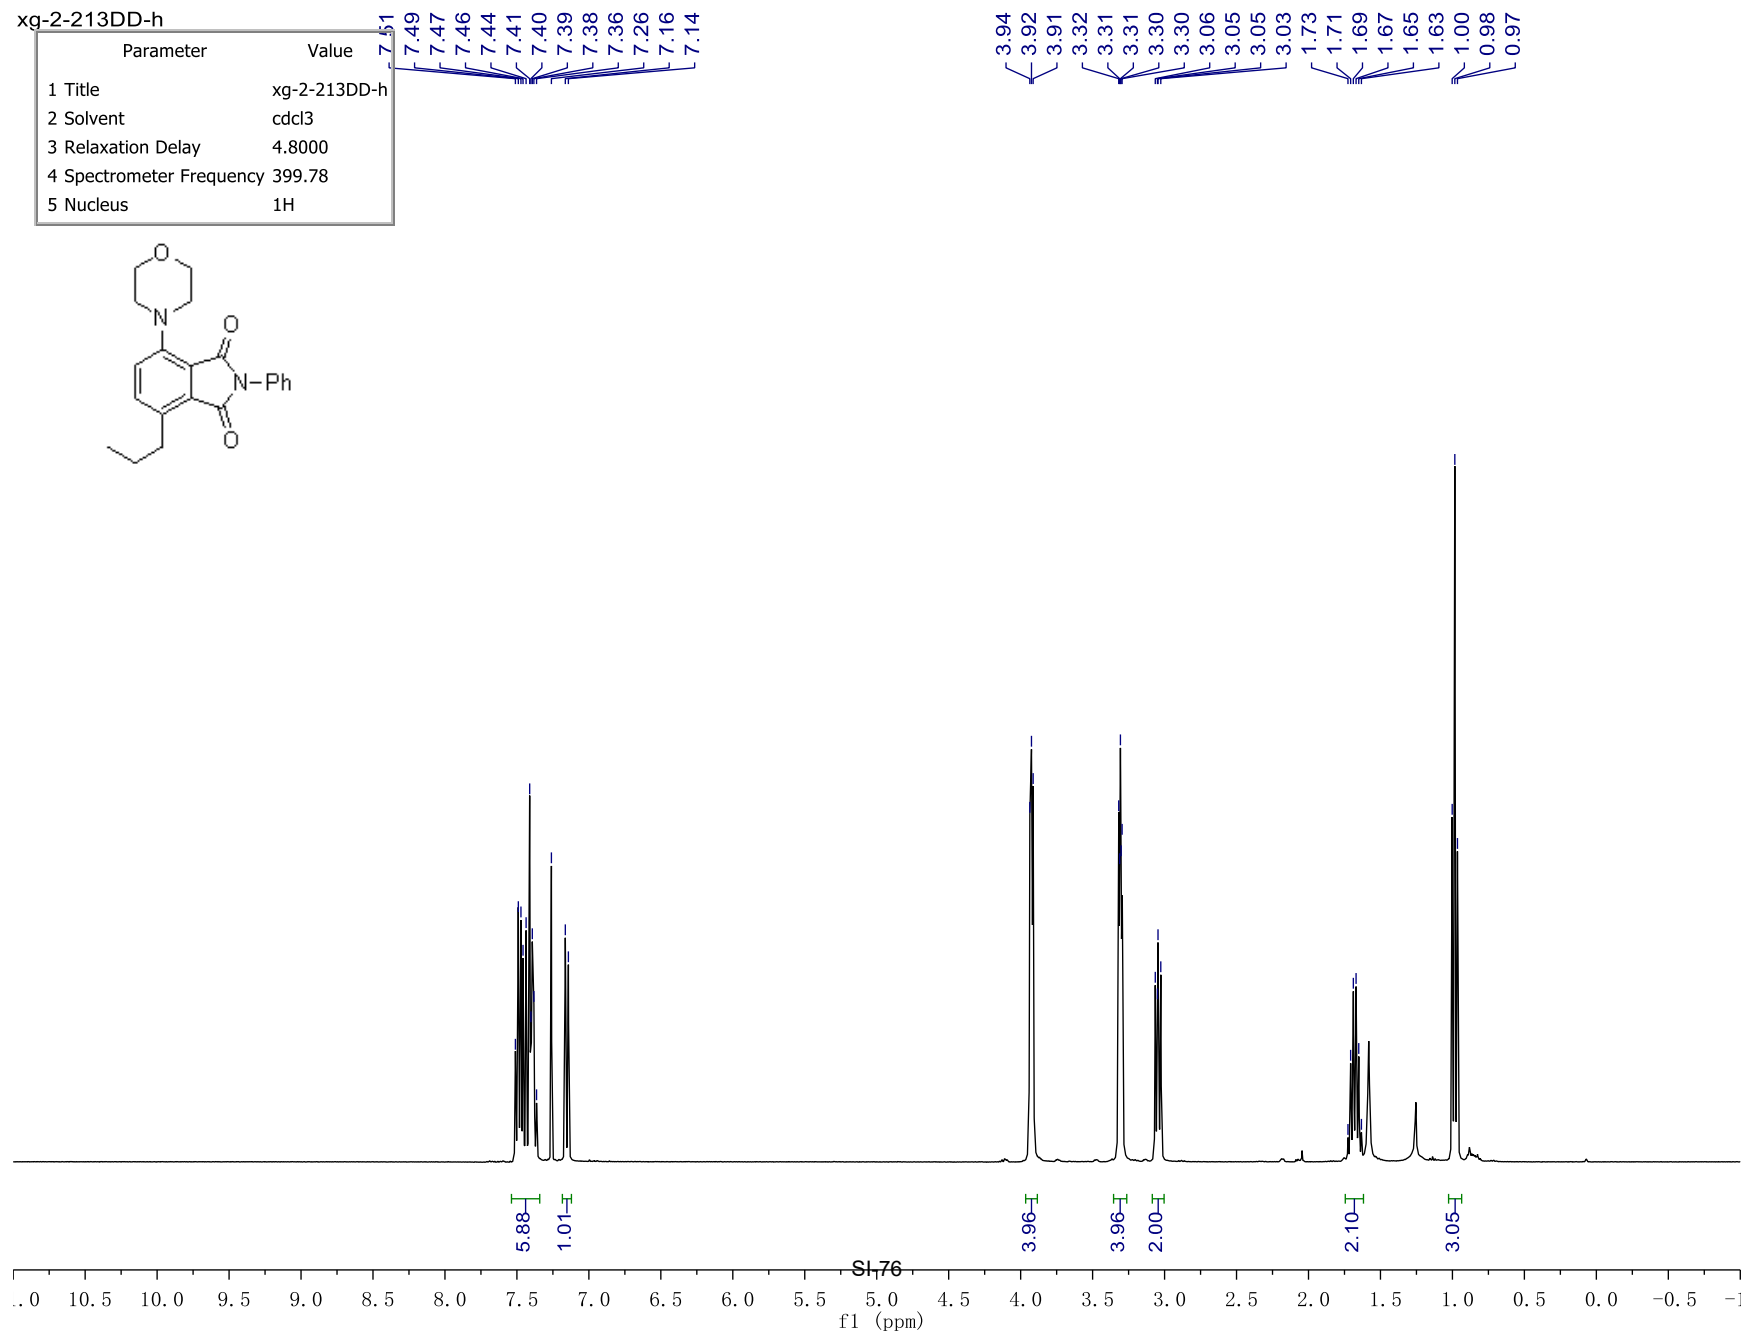

xg-2-213DD-c13

| Parameter                | Value          |
|--------------------------|----------------|
| 1 Title                  | xg-2-213DD-c13 |
| 2 Solvent                | cdcl3          |
| 3 Relaxation Delay       | 1.0000         |
| 4 Spectrometer Frequency | 100.53         |
| 5 Nucleus                | 13C            |

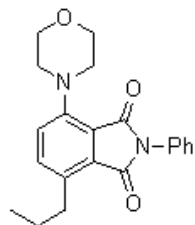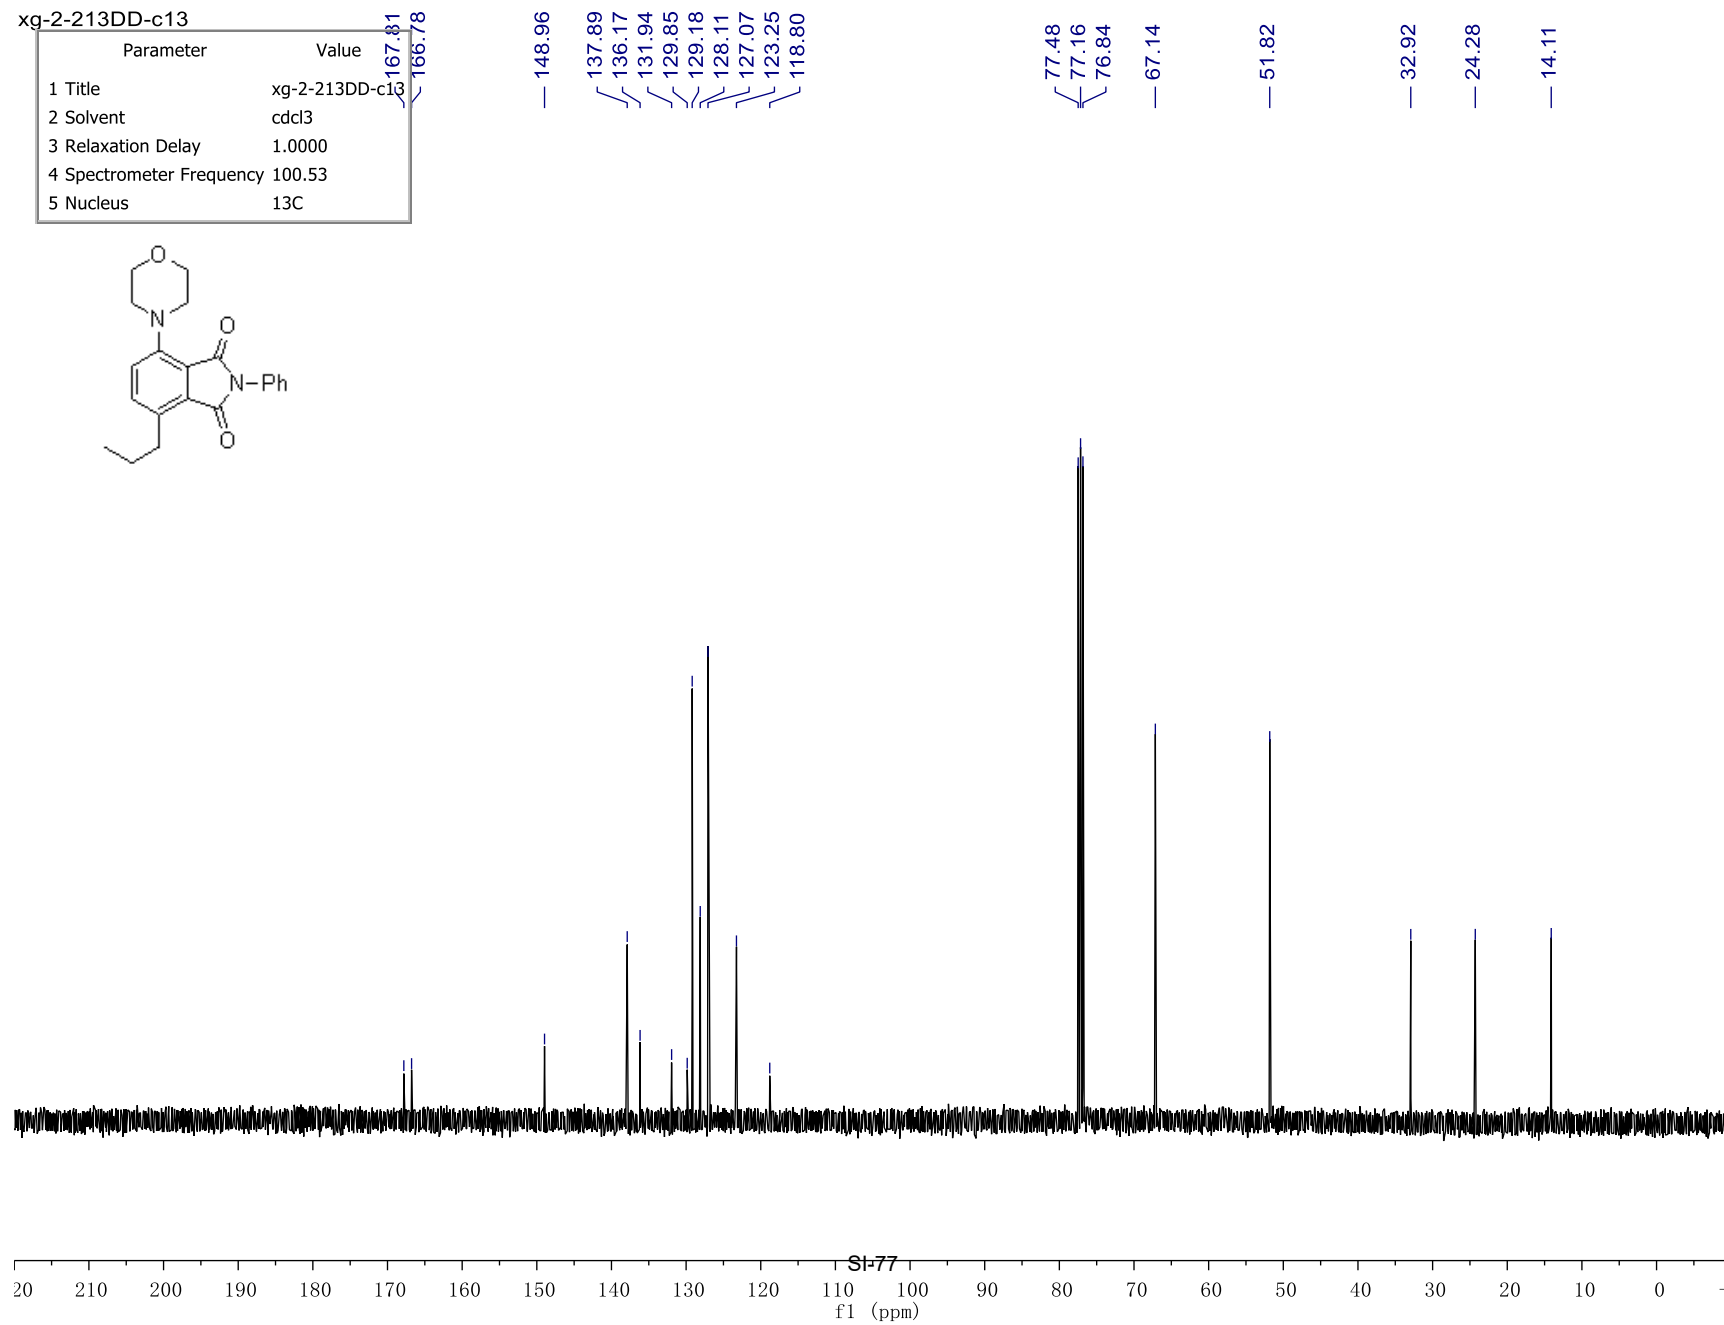

xg-2-202A-h

| Parameter                | Value       |
|--------------------------|-------------|
| 1 Title                  | xg-2-202A-h |
| 2 Solvent                | cdcl3       |
| 3 Relaxation Delay       | 4.8000      |
| 4 Spectrometer Frequency | 399.78      |
| 5 Nucleus                | 1H          |

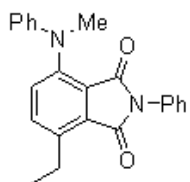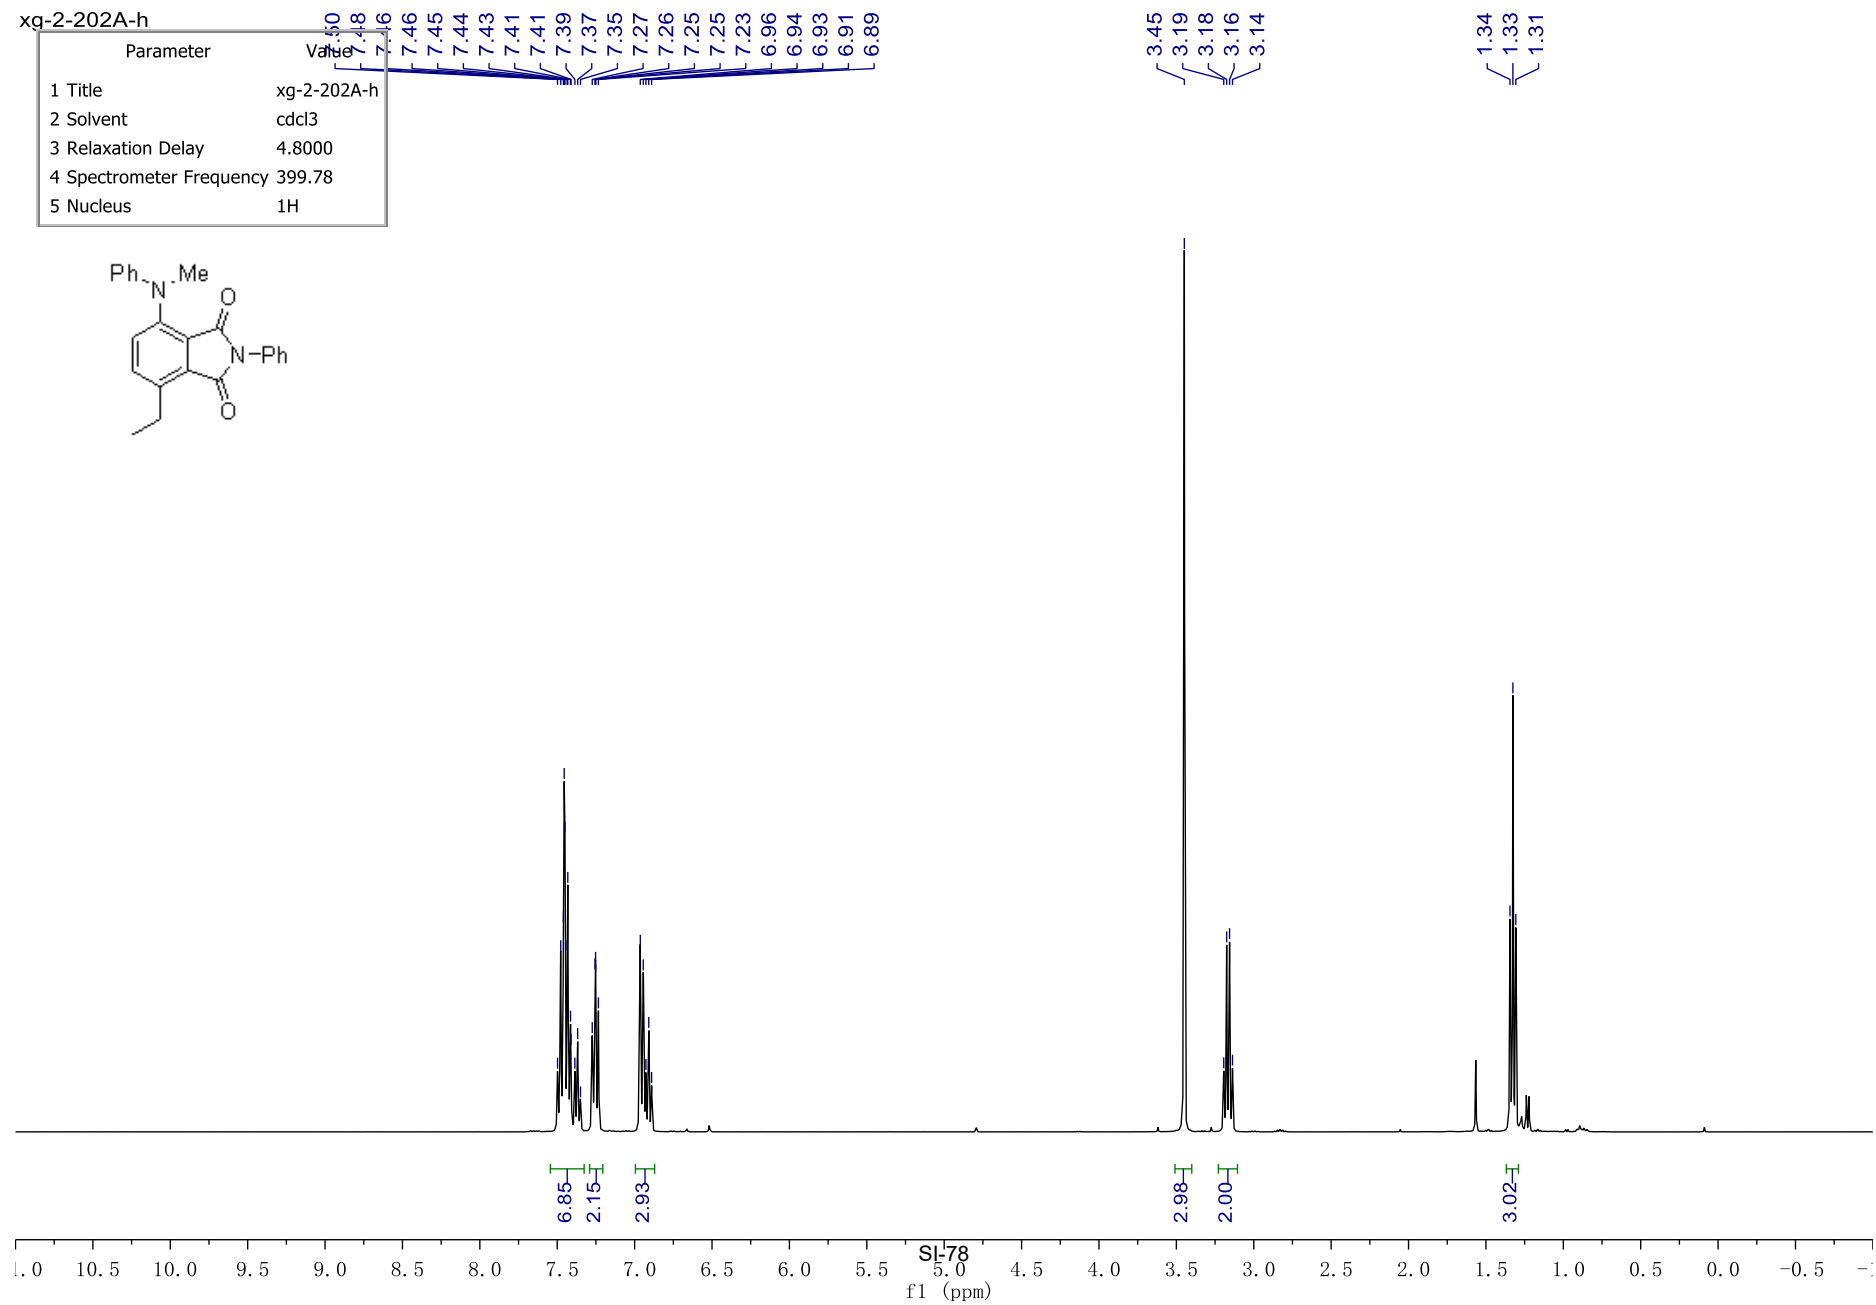

xg-2-202A-c13

| Parameter                | Value         |
|--------------------------|---------------|
| 1 Title                  | xg-2-202A-c13 |
| 2 Solvent                | cdcl3         |
| 3 Relaxation Delay       | 1.0000        |
| 4 Spectrometer Frequency | 100.53        |
| 5 Nucleus                | 13C           |

167.55  
165.44

148.12  
145.35  
140.46  
136.46  
132.58  
131.93  
129.60  
129.21  
129.05  
127.94  
126.87  
122.88  
120.58  
117.35

77.48  
77.16  
76.84

41.05

24.39

15.08

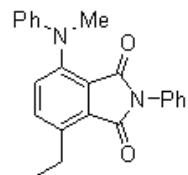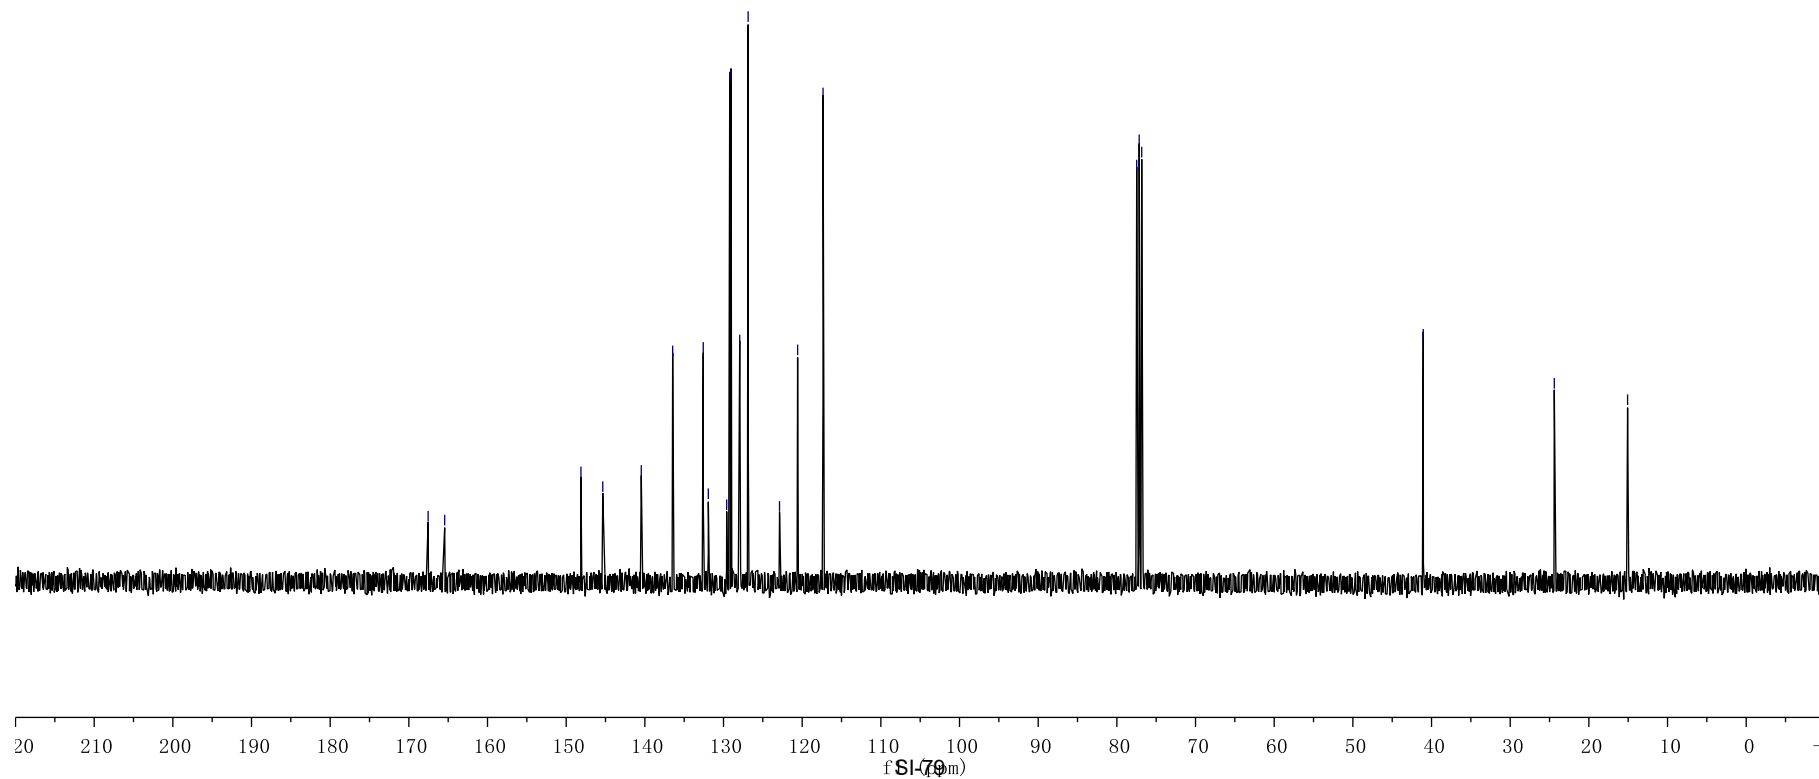

xg-2-202B-h

| Parameter                | Value       |
|--------------------------|-------------|
| 1 Title                  | xg-2-202B-h |
| 2 Solvent                | cdcl3       |
| 3 Relaxation Delay       | 4.8000      |
| 4 Spectrometer Frequency | 399.78      |
| 5 Nucleus                | 1H          |

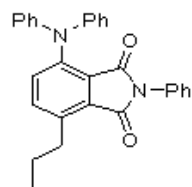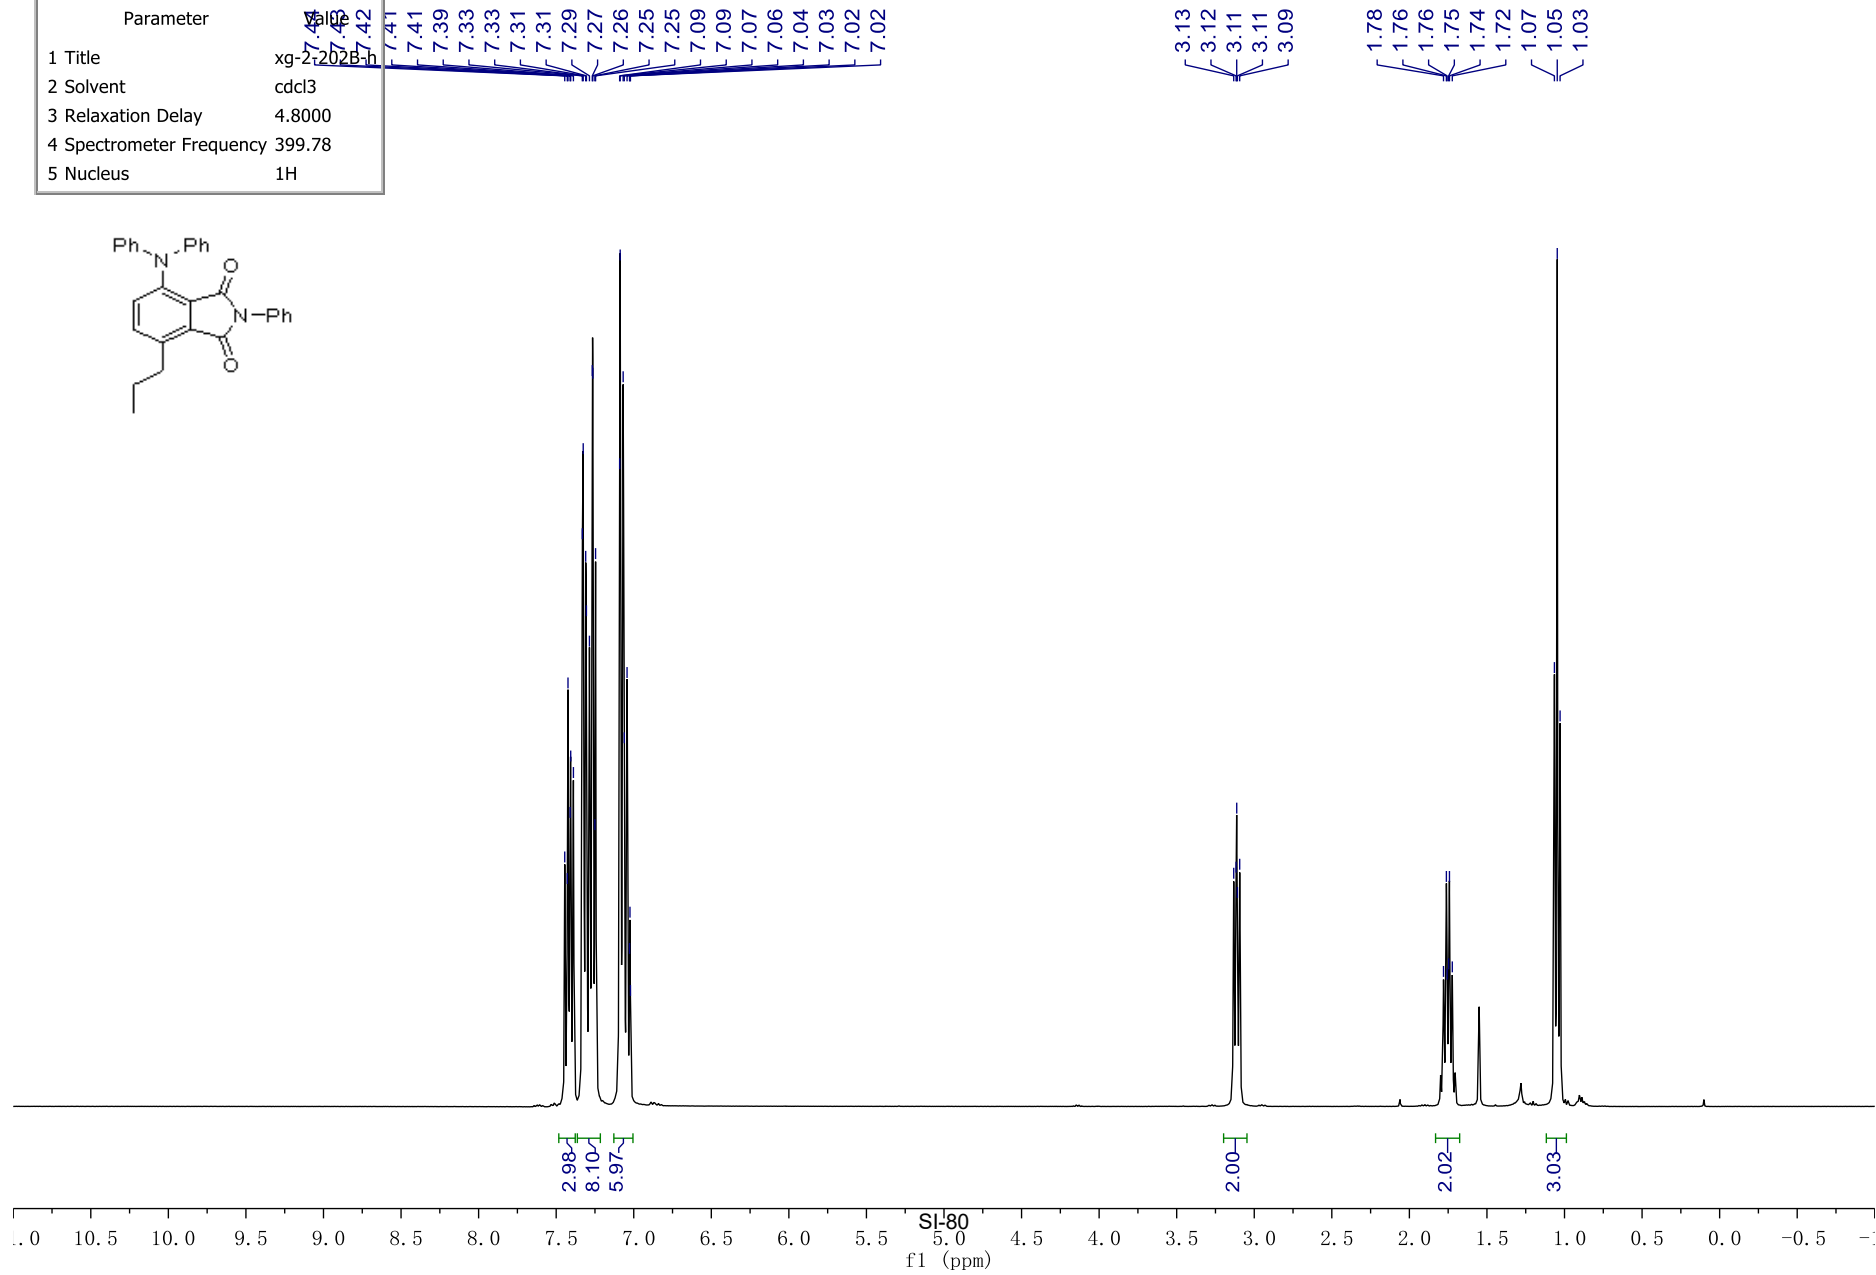



xg-2-202B-c13

| Parameter                | Value         |
|--------------------------|---------------|
| 1 Title                  | xg-2-202B-c13 |
| 2 Solvent                | cdcl3         |
| 3 Relaxation Delay       | 1.0000        |
| 4 Spectrometer Frequency | 100.53        |
| 5 Nucleus                | 13C           |

167.47  
164.28  
147.85  
143.37  
139.09  
137.40  
133.52  
131.86  
129.88  
129.31  
128.92  
127.73  
126.78  
123.65  
123.47  
123.45

77.48  
77.16  
76.84

33.19

24.23

14.21

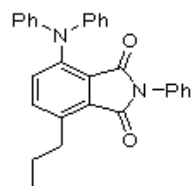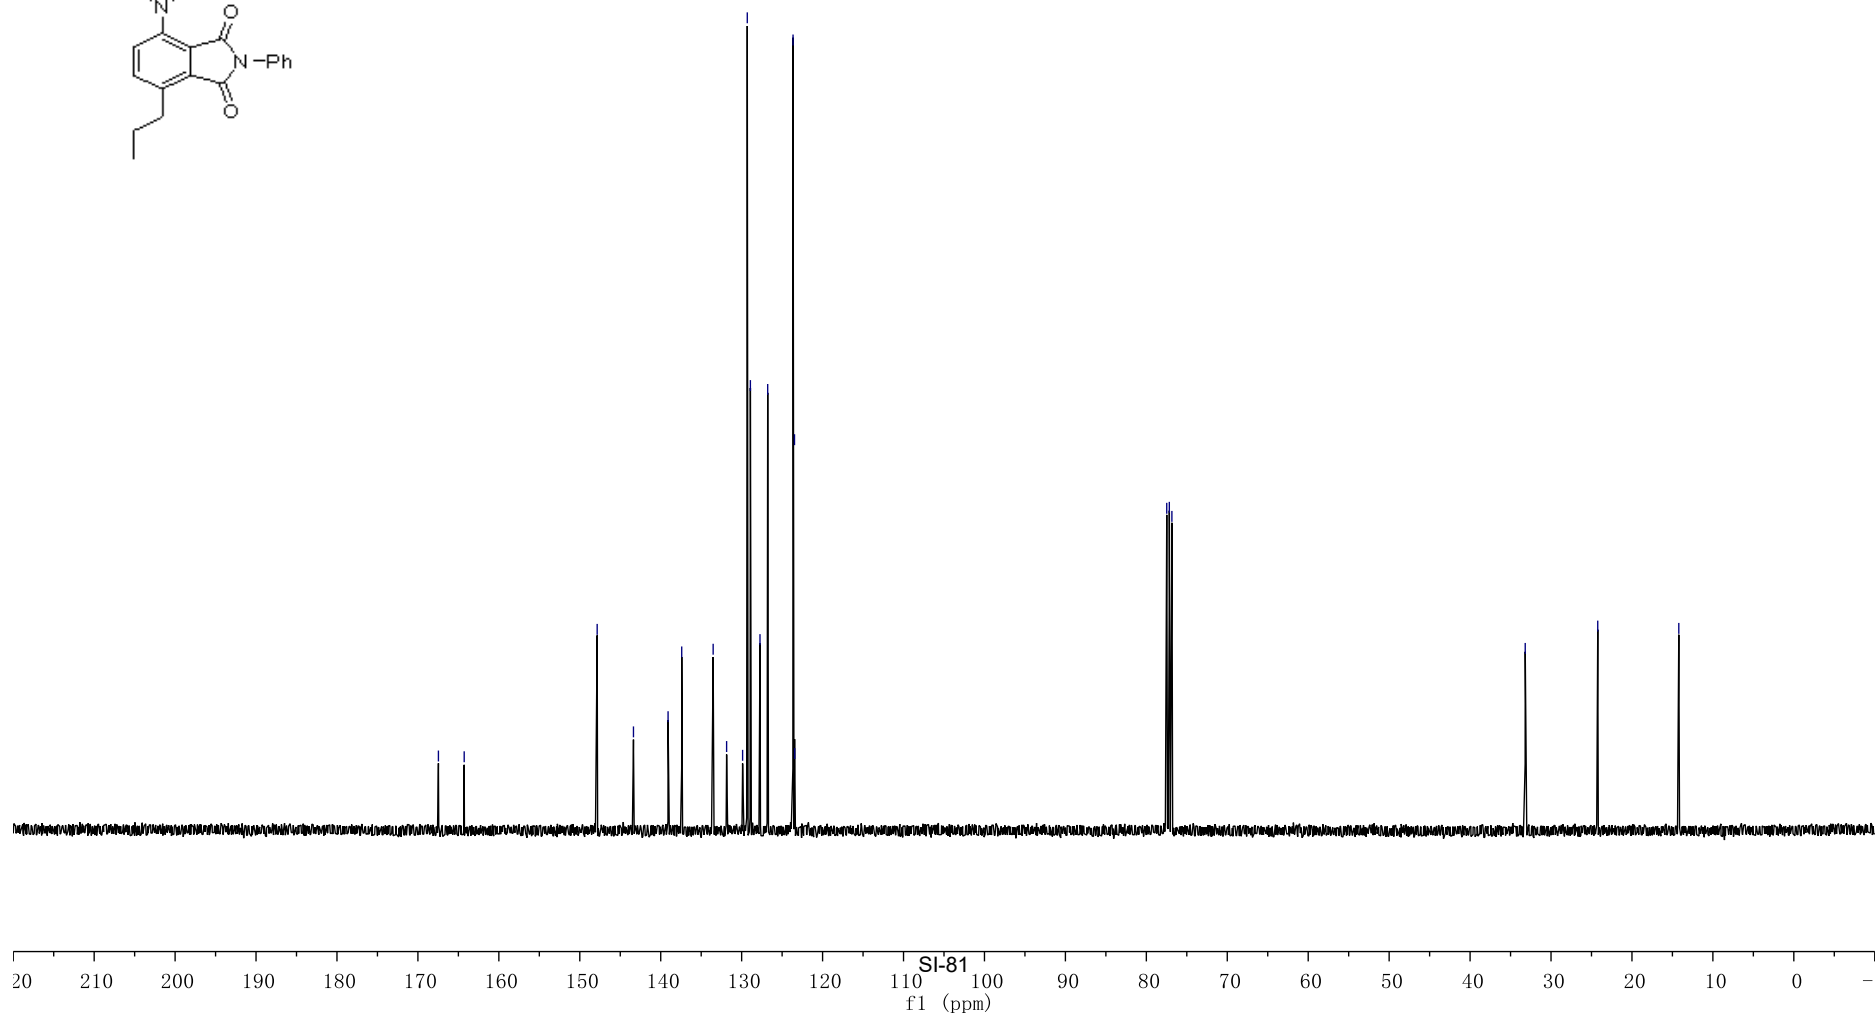

xg-2-225B-h

| Parameter                | Value       |
|--------------------------|-------------|
| 1 Title                  | xg-2-225B-h |
| 2 Solvent                | CDCl3       |
| 3 Relaxation Delay       | 4.8000      |
| 4 Spectrometer Frequency | 499.86      |
| 5 Nucleus                | 1H          |

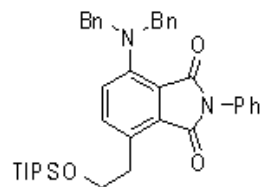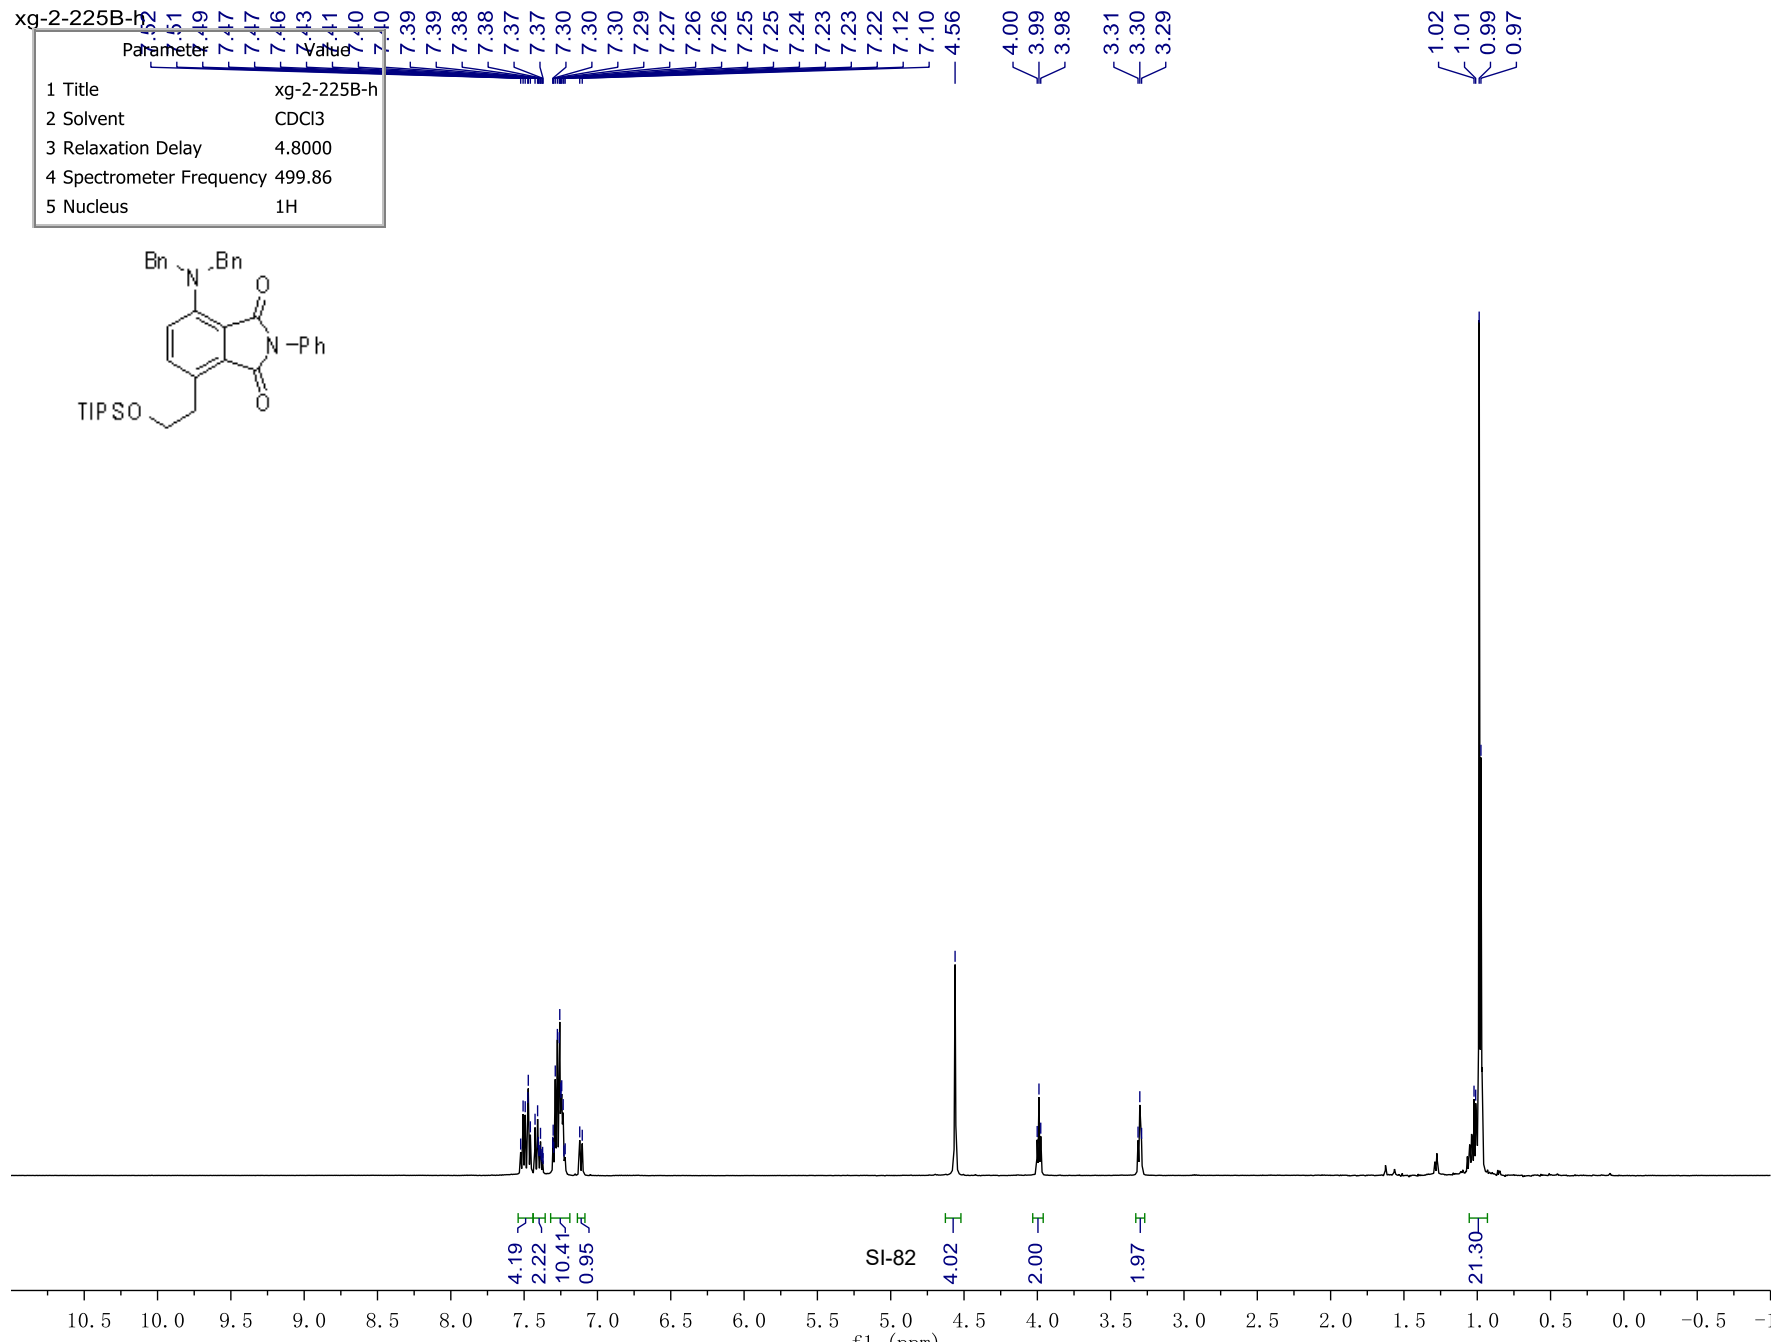



xg-3-36B-h

| Parameter                | Value      |
|--------------------------|------------|
| 1 Title                  | xg-3-36B-h |
| 2 Solvent                | CDCl3      |
| 3 Relaxation Delay       | 4.8000     |
| 4 Spectrometer Frequency | 499.86     |
| 5 Nucleus                | 1H         |

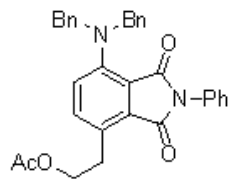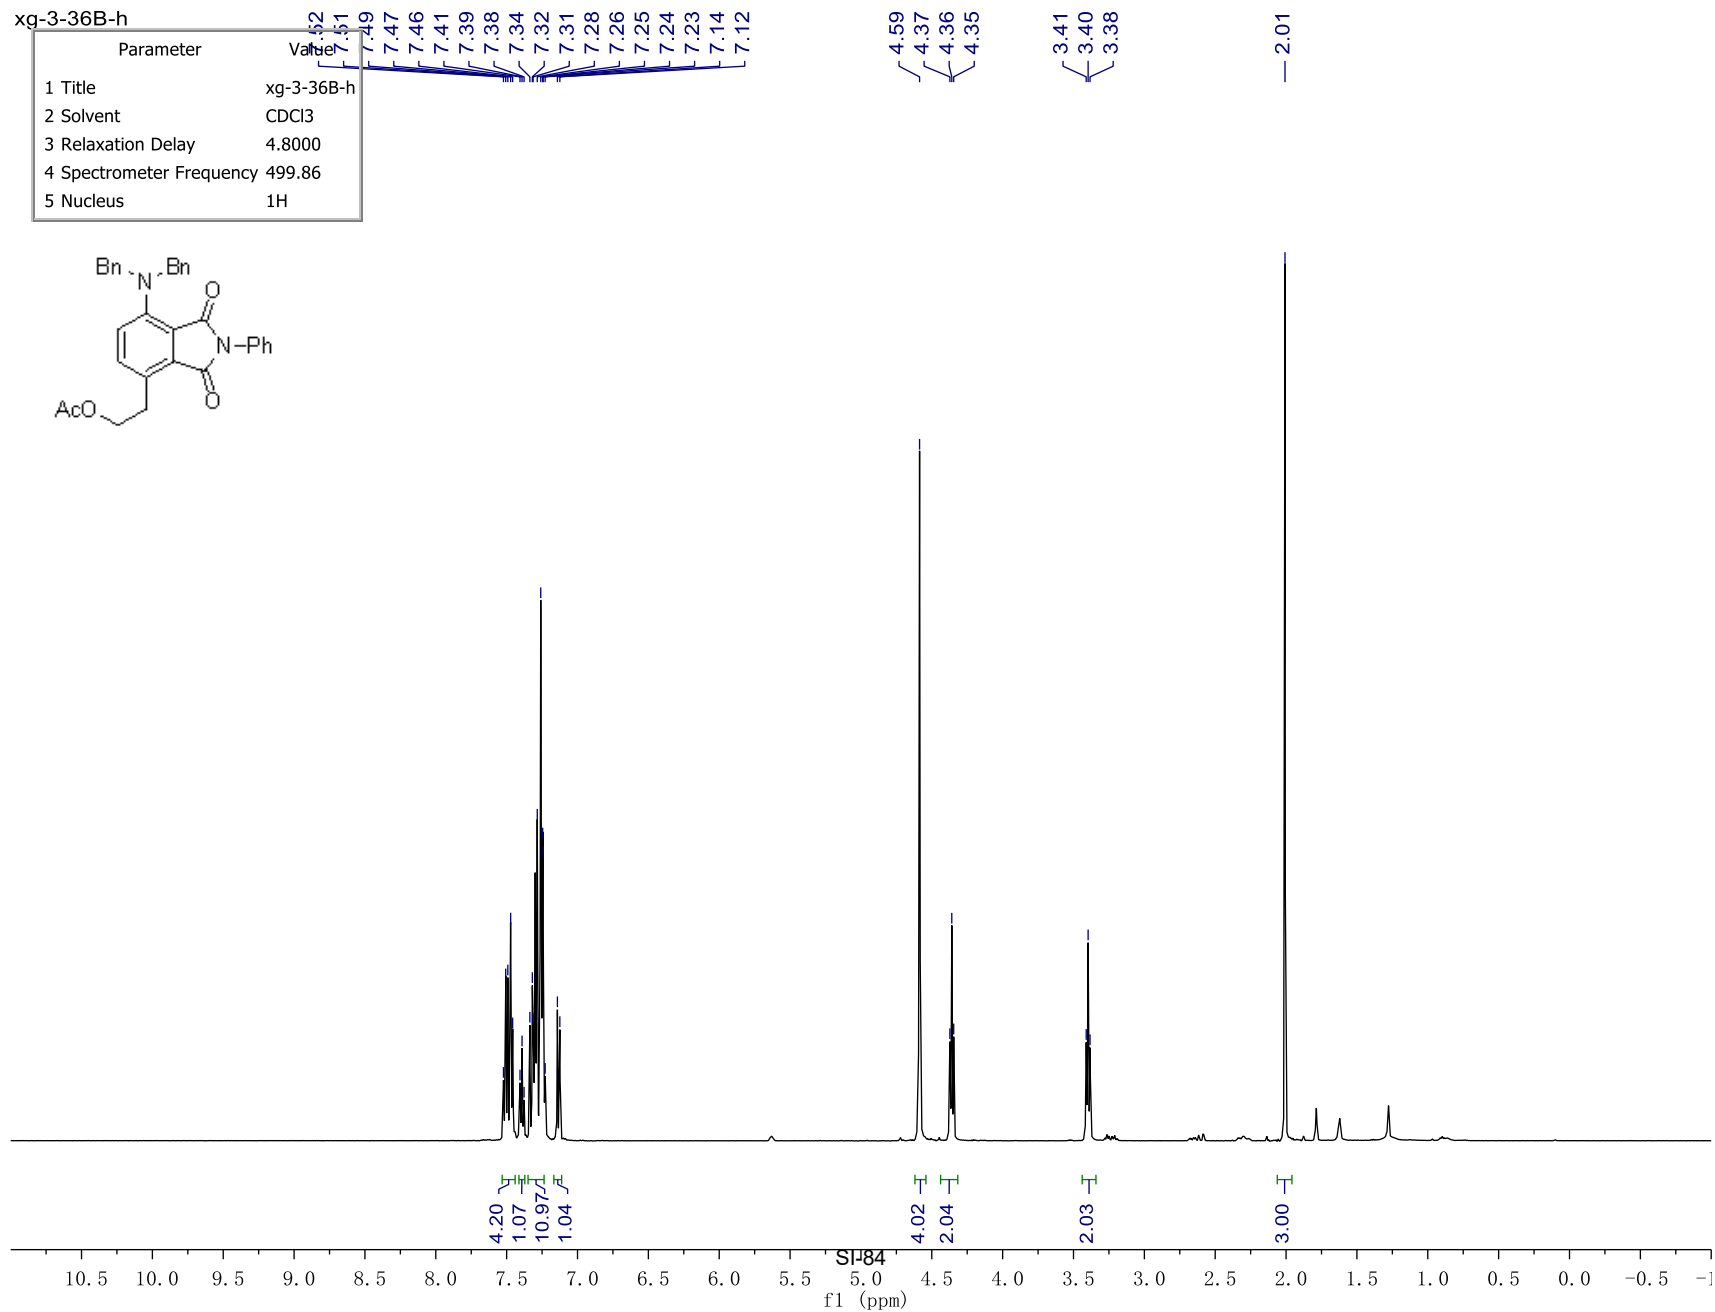

xg-3-36B-c13

| Parameter                | Value        |
|--------------------------|--------------|
| 1 Title                  | xg-3-36B-c13 |
| 2 Solvent                | CDCl3        |
| 3 Relaxation Delay       | 1.0000       |
| 4 Spectrometer Frequency | 125.70       |
| 5 Nucleus                | 13C          |

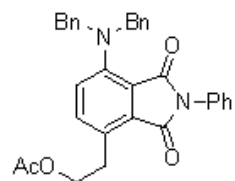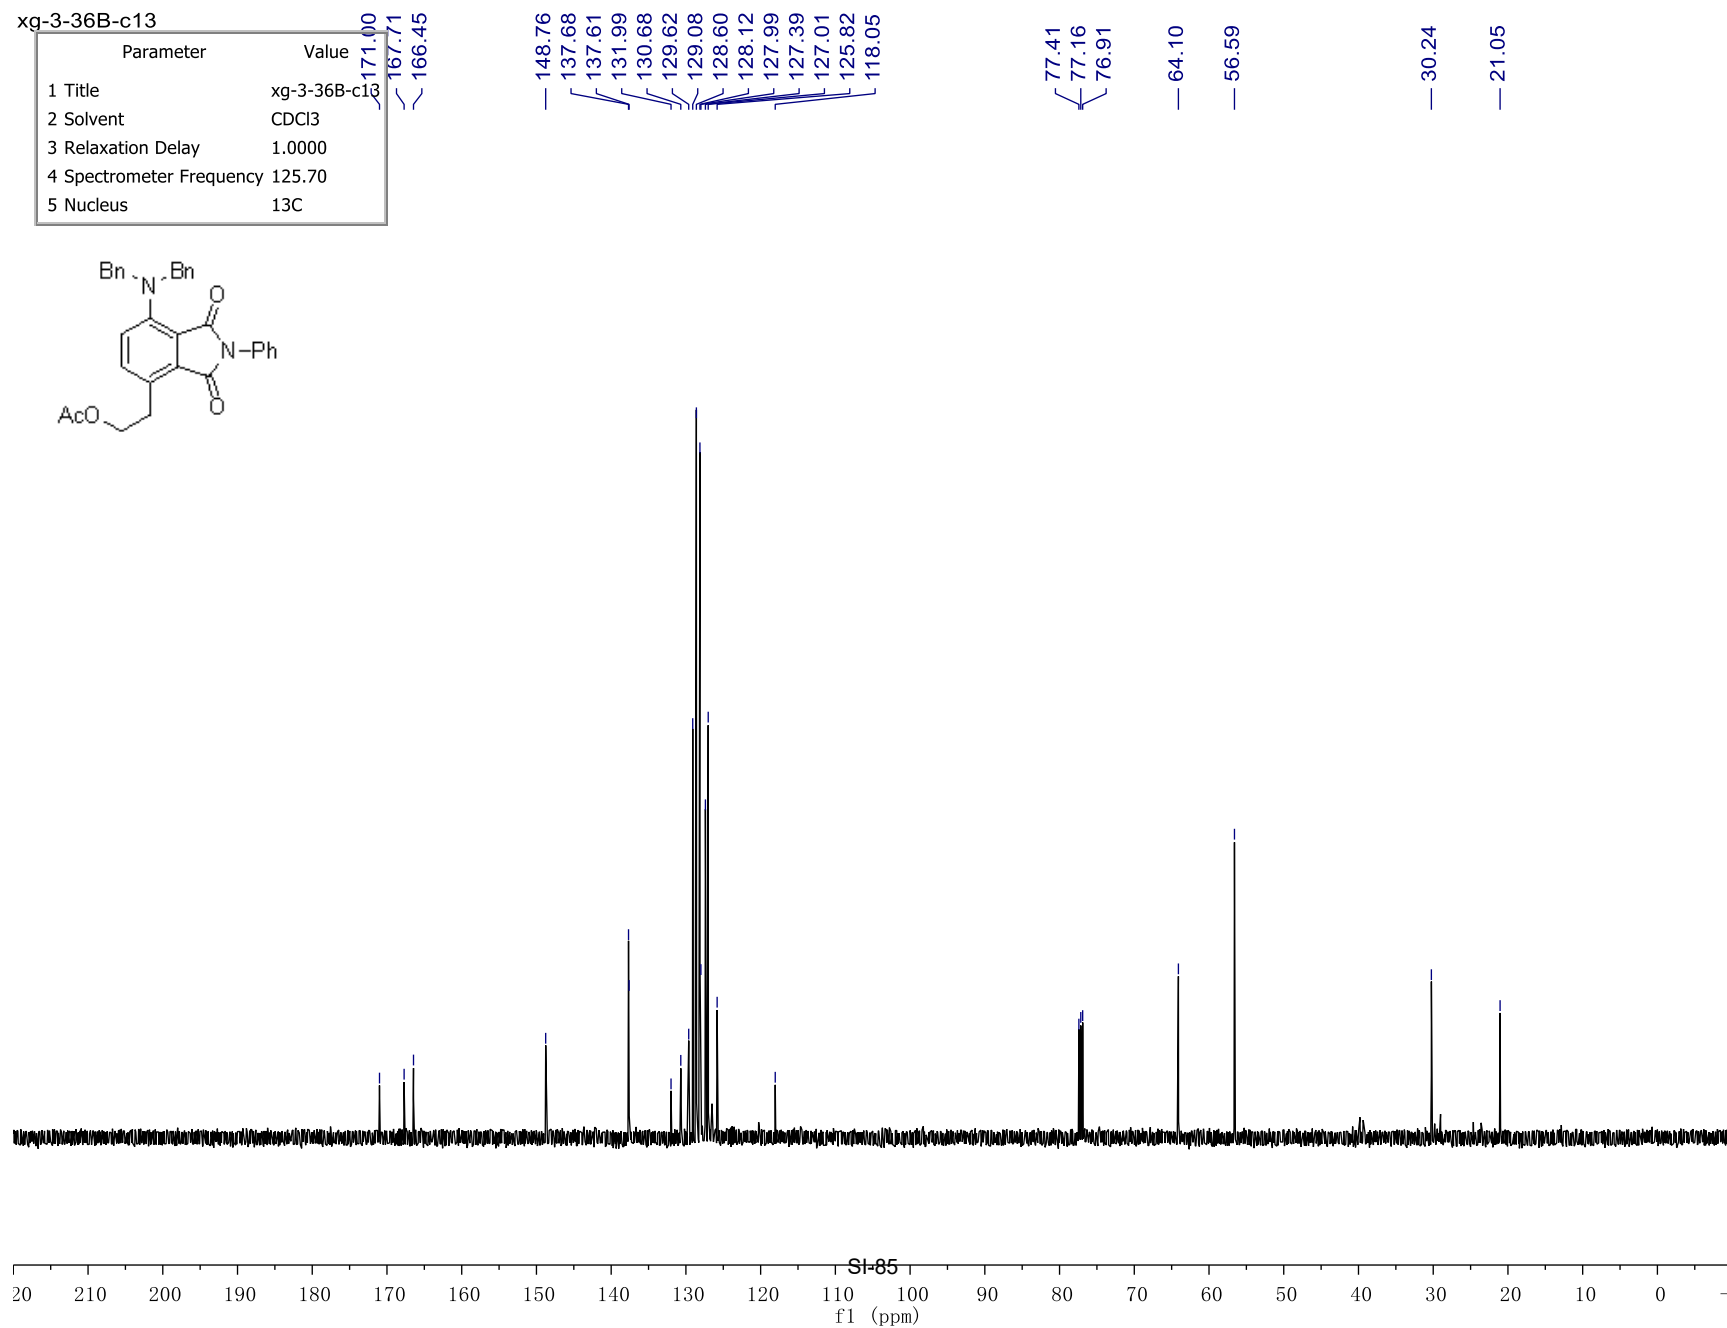

xg-2-243Apure-h

| Parameter                | Value           |
|--------------------------|-----------------|
| 1 Title                  | xg-2-243Apure-h |
| 2 Solvent                | CDCl3           |
| 3 Relaxation Delay       | 4.8000          |
| 4 Spectrometer Frequency | 499.86          |
| 5 Nucleus                | 1H              |

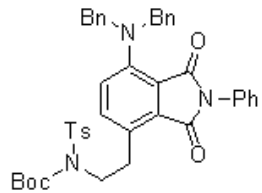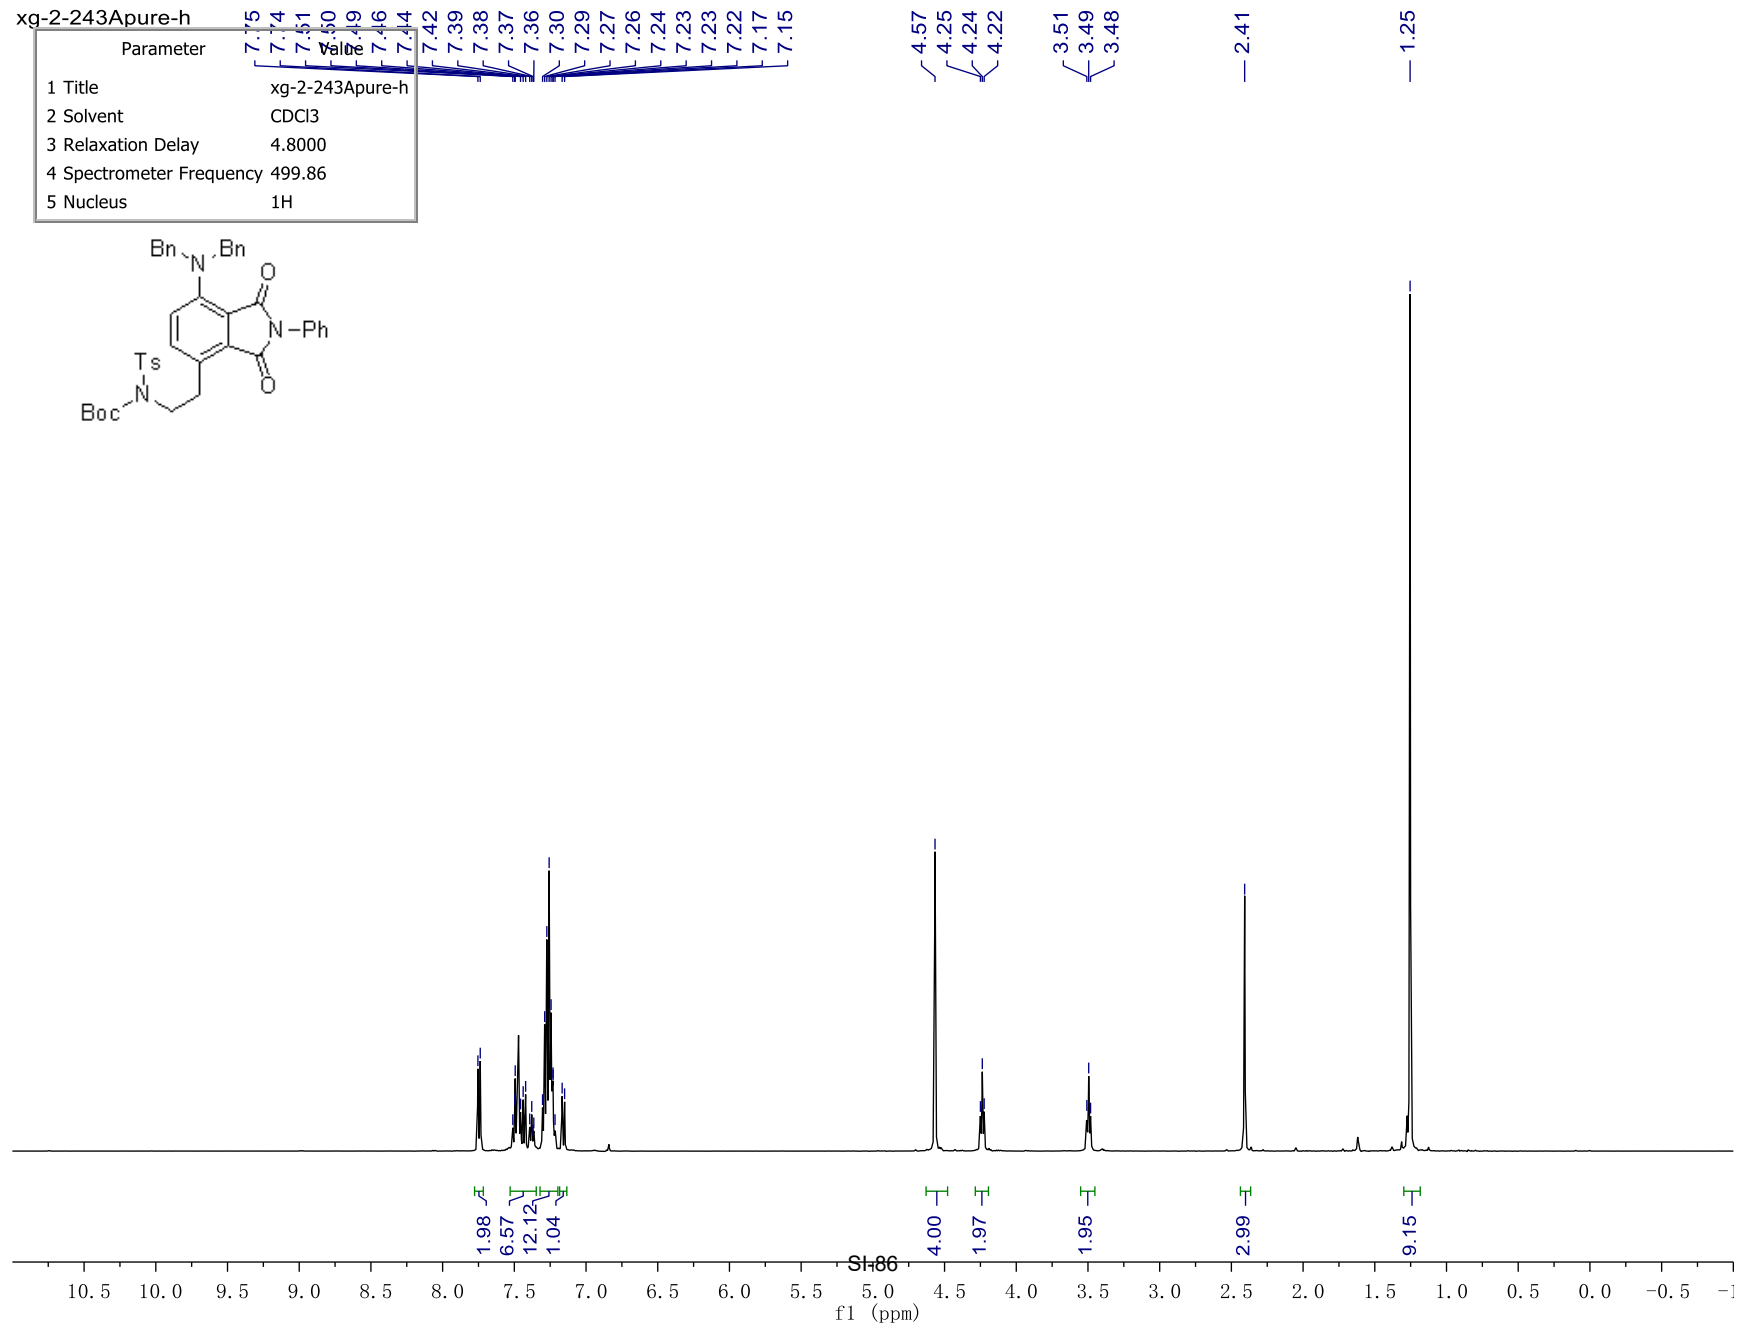







xg-2-241B-c13

| Parameter                | Value         |
|--------------------------|---------------|
| 1 Title                  | xg-2-241B-c13 |
| 2 Solvent                | CDCl3         |
| 3 Relaxation Delay       | 1.0000        |
| 4 Spectrometer Frequency | 125.70        |
| 5 Nucleus                | 13C           |

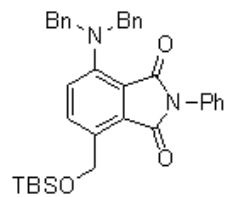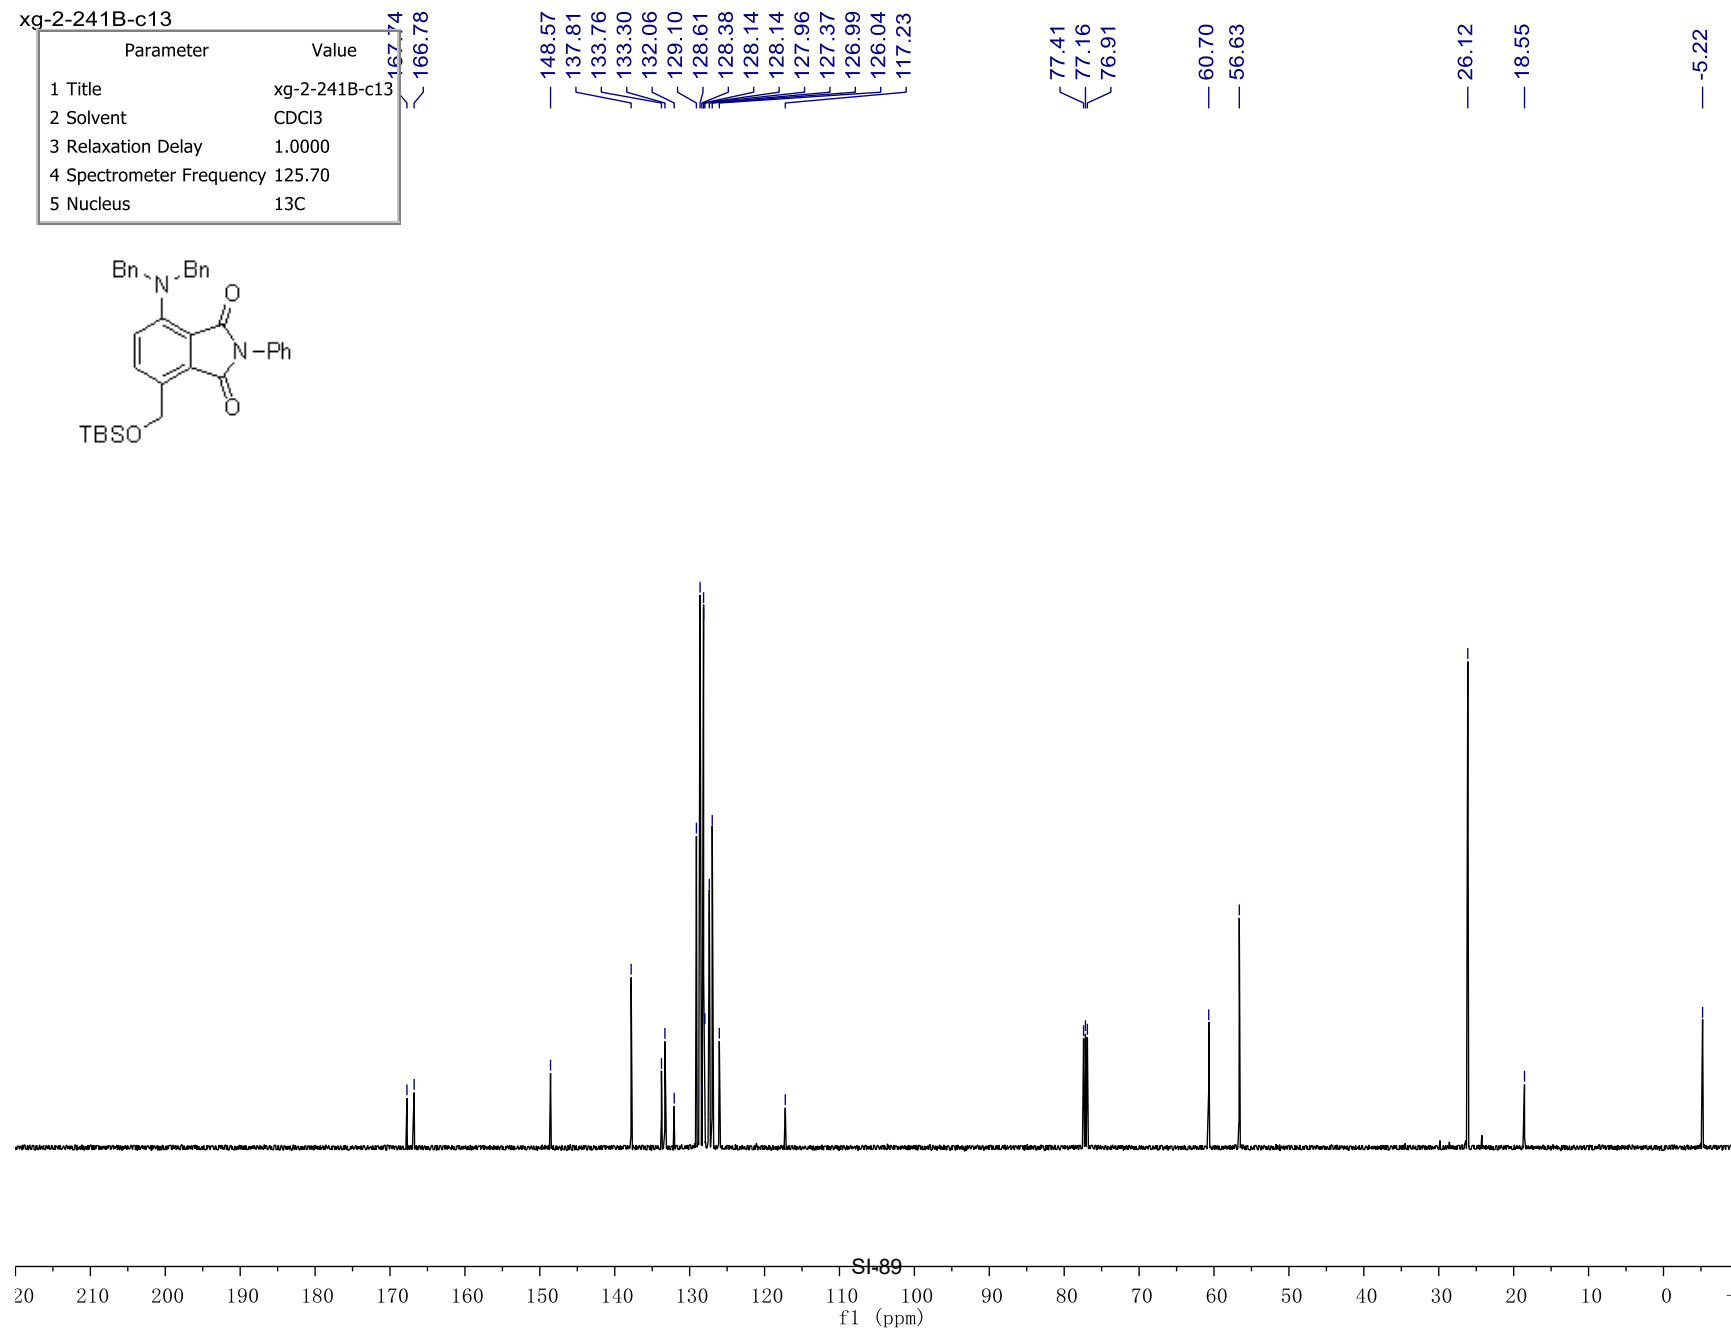

xg-2-235A-h  
 7.31  
 7.30  
 7.29  
 7.28  
 7.27  
 7.26  
 7.25  
 7.24  
 7.24  
 7.23  
 7.23  
 7.19  
 7.17  
 4.56  
 3.85  
 3.84  
 3.83  
 3.82  
 3.82  
 3.81  
 3.80  
 3.79  
 1.92  
 1.90  
 1.87  
 1.86  
 1.85  
 1.84  
 1.84  
 1.83  
 1.80  
 1.77  
 1.64  
 1.63  
 1.57  
 1.55  
 1.54  
 1.54  
 1.52  
 1.52  
 1.51  
 1.50  
 1.49  
 1.49  
 1.47  
 1.47  
 1.44  
 1.44  
 1.42  
 1.41  
 1.41  
 1.40  
 1.39  
 1.30  
 1.29  
 1.28  
 1.27  
 1.26  
 1.25  
 1.24

| Parameter              | Value       |
|------------------------|-------------|
| Title                  | xg-2-235A-h |
| Author                 | vnmr1       |
| Solvent                | CDCl3       |
| Spectrometer Frequency | 499.86      |
| Nucleus                | 1H          |

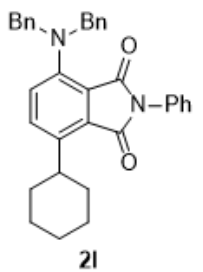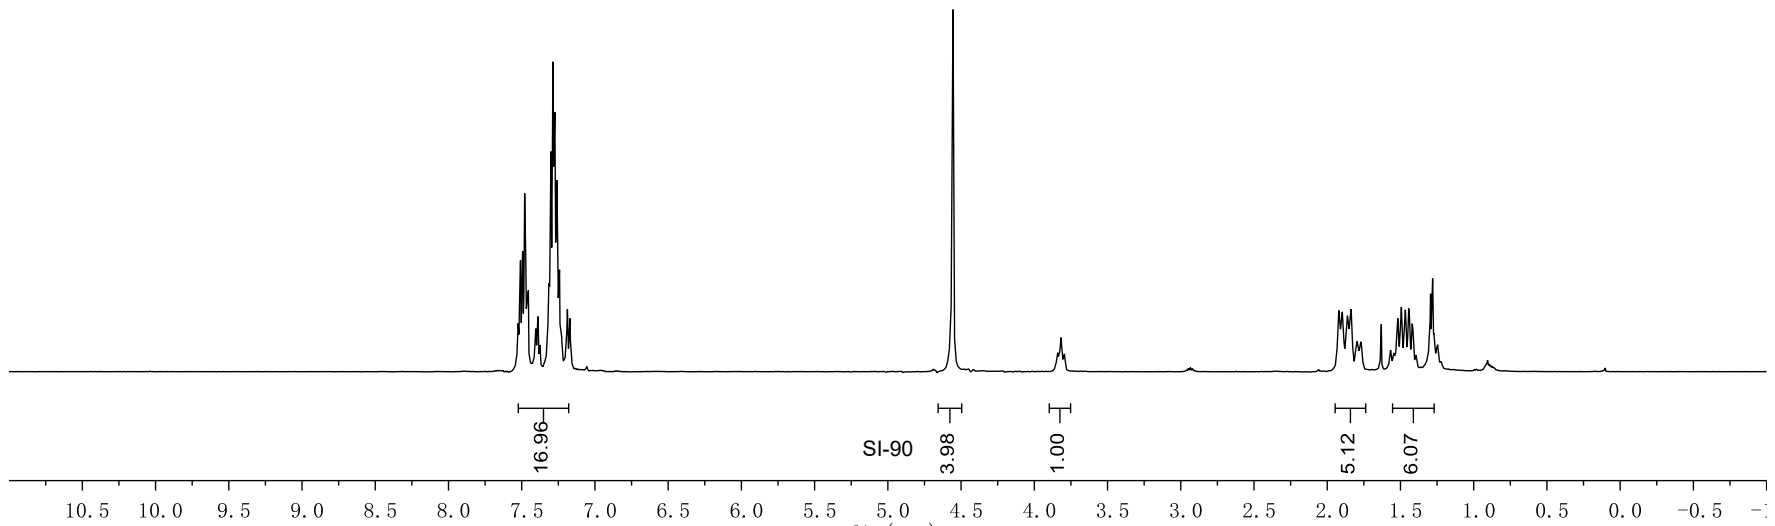

xg-2-235A-c13-

| Parameters             |                |
|------------------------|----------------|
| Parameter              | Value          |
| Title                  | xg-2-235A-c13- |
| Author                 |                |
| Solvent                | CDCl3          |
| Spectrometer Frequency | 125.70         |
| Nucleus                | 13C            |

166.06  
166.54

147.95  
140.74  
137.94  
133.48  
132.16  
129.07  
129.05  
128.56  
128.19  
127.92  
127.31  
127.16  
126.26  
121.08  
118.09

56.57

37.45  
33.58  
26.88  
26.36  
26.29  
24.24

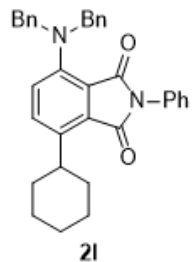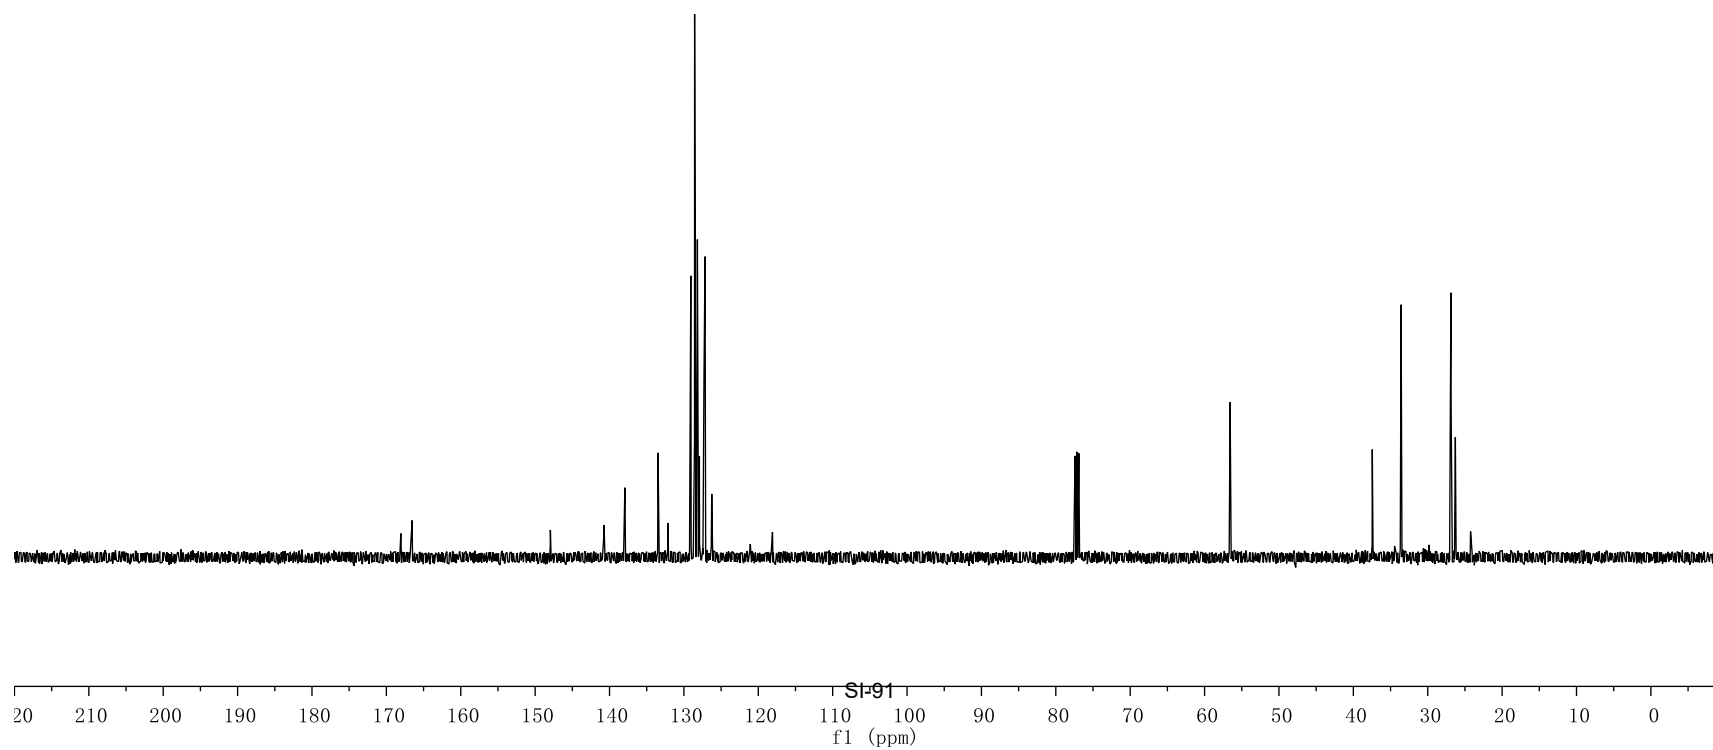

mx5h-172A-P

| Parameters             |             |
|------------------------|-------------|
| Parameter              | Value       |
| Title                  | mx5h-172A-P |
| Solvent                | cdcl3       |
| Spectrometer Frequency | 499.85      |
| Nucleus                | 1H          |

1.56 Water

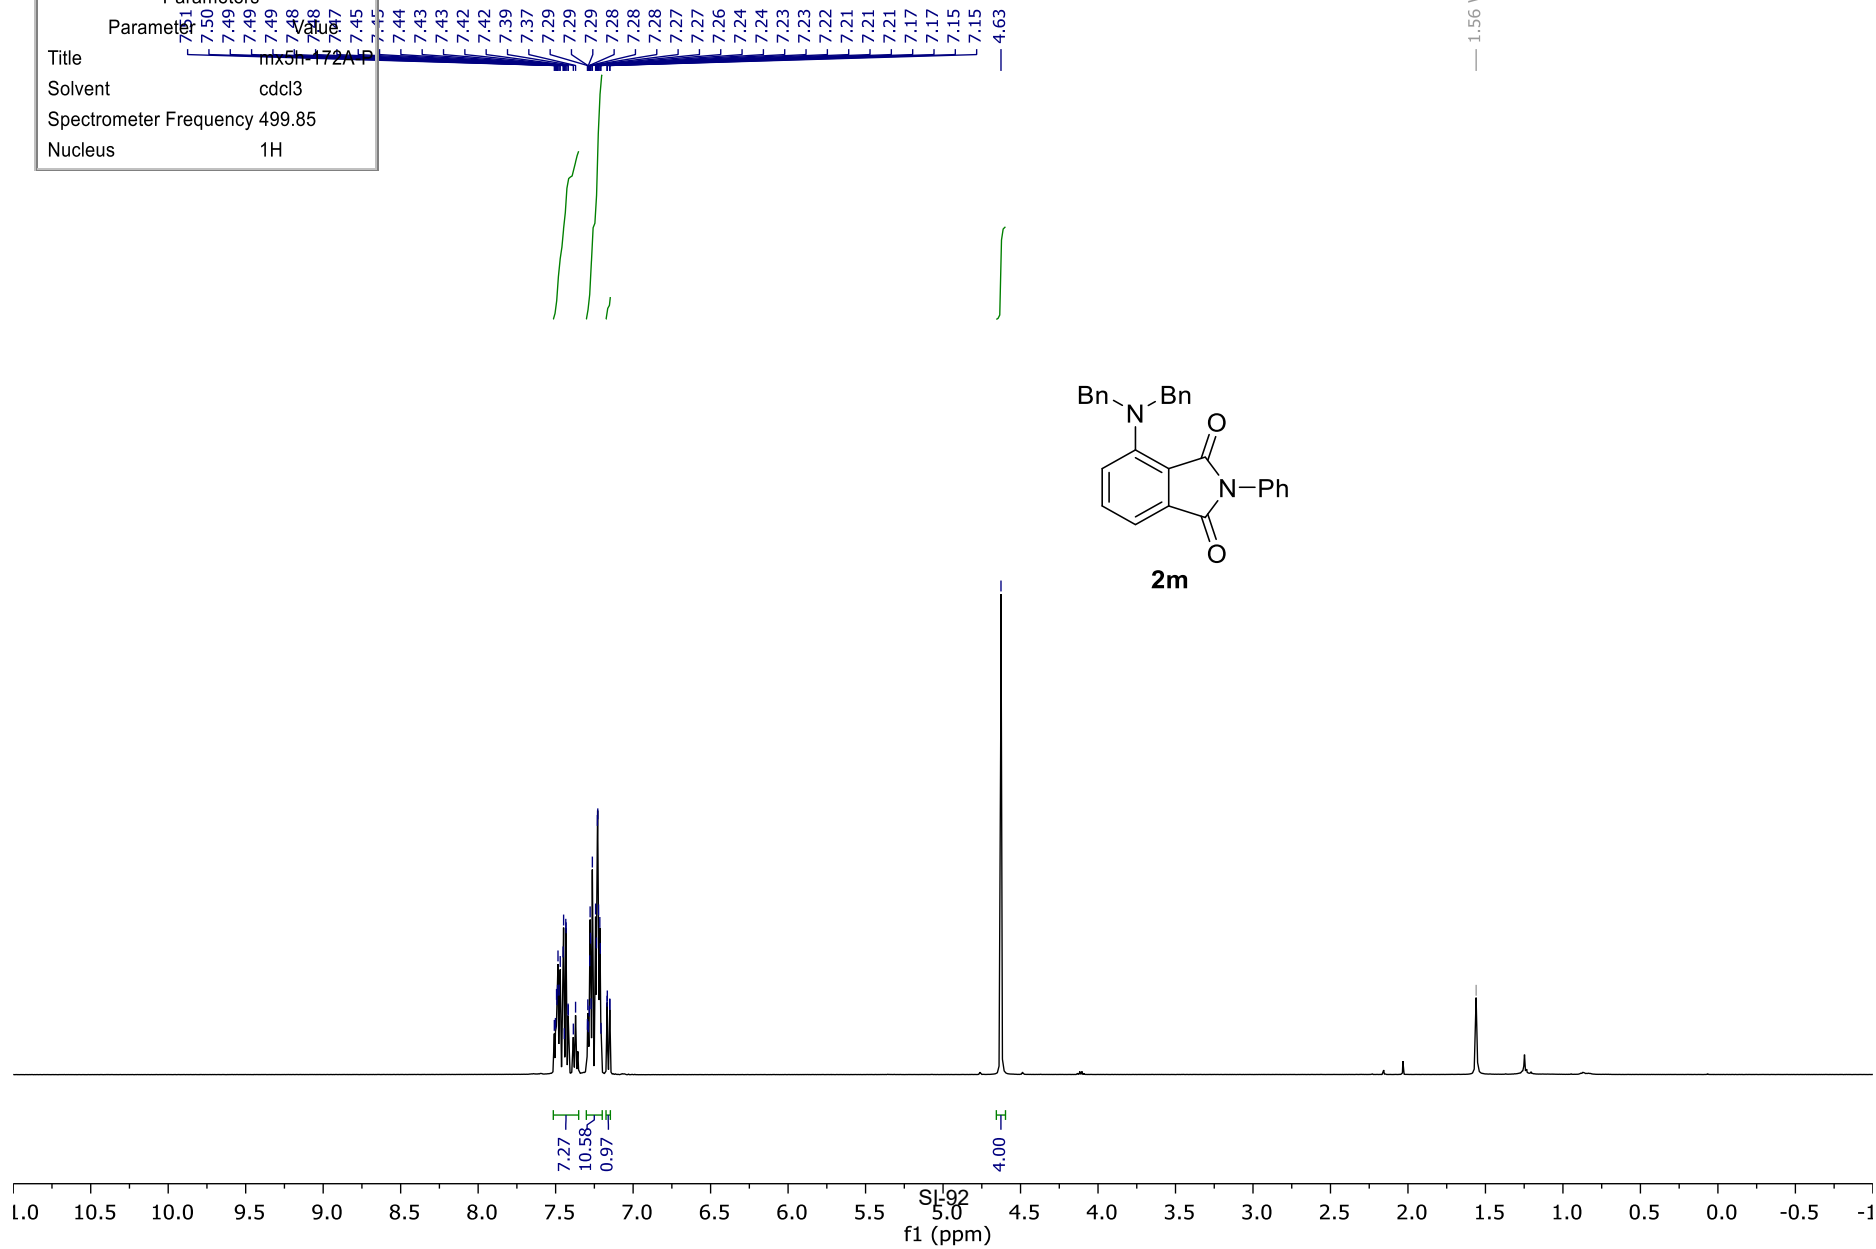

mx5c-172A-P

| Std carbon             | Parameters      |
|------------------------|-----------------|
|                        | Parameter Value |
| Title                  | mx5c-172A-P     |
| Solvent                | cdcl3           |
| Spectrometer Frequency | 125.70          |
| Nucleus                | 13C             |

167.45  
166.95

149.73  
137.63  
135.13  
134.73  
132.13  
129.16  
128.66  
128.07  
128.04  
127.45  
127.01  
125.41  
117.04  
115.37

77.41  
77.16  
76.91

56.58

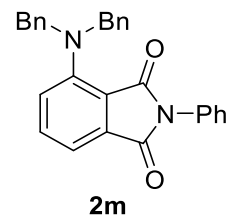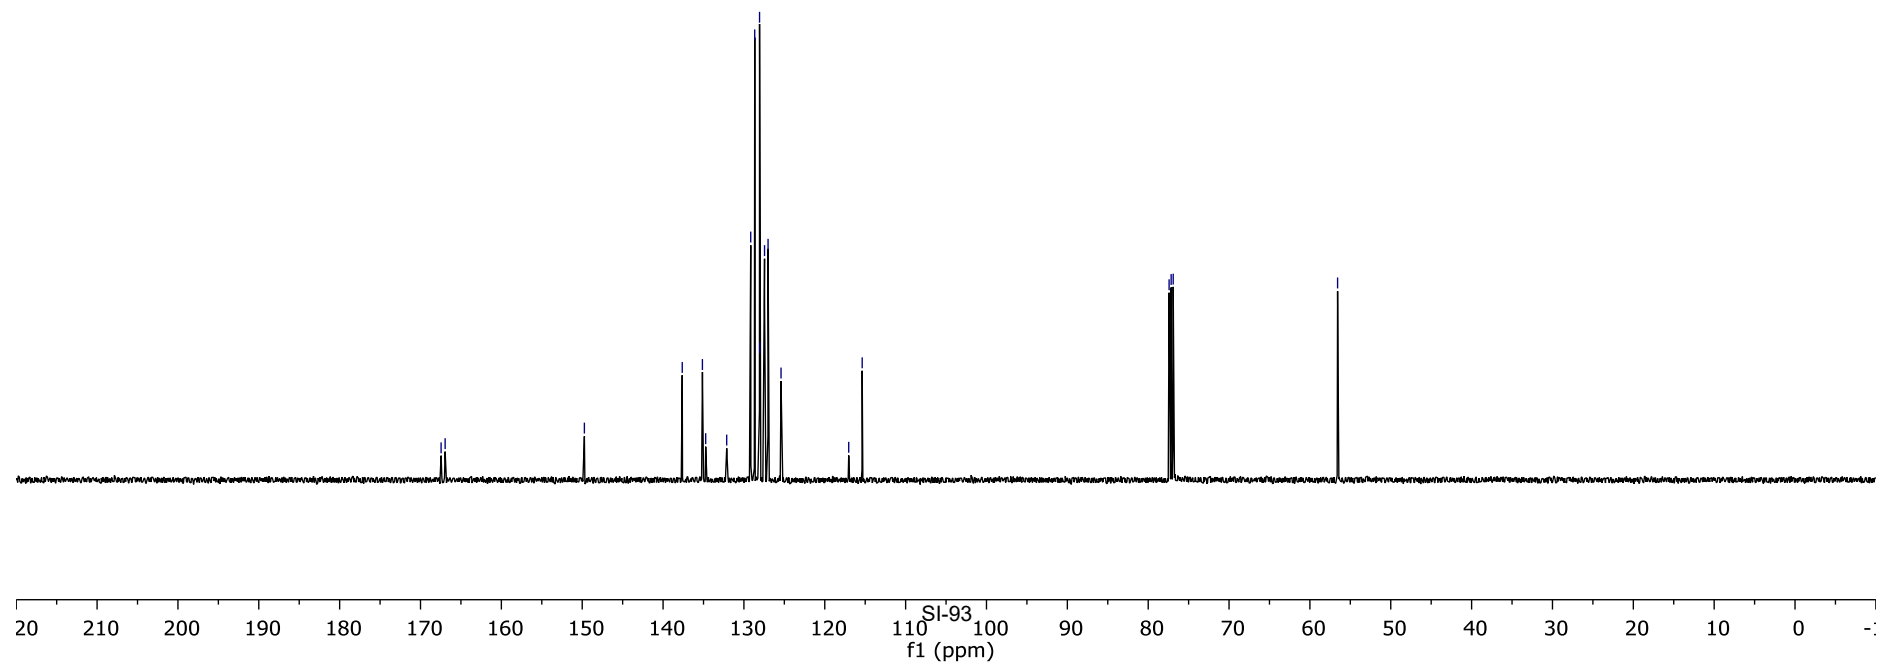

mx5h-171A-P

| Parameter              | Value       |
|------------------------|-------------|
| Title                  | mx5h-171A-P |
| Solvent                | cdcl3       |
| Spectrometer Frequency | 499.85      |
| Nucleus                | 1H          |

Parameters

7.49  
7.48  
7.48  
7.47  
7.47  
7.46  
7.46  
7.45  
7.44  
7.44  
7.43  
7.42  
7.32  
7.32  
7.31  
7.31  
7.30  
7.29  
7.28  
7.28  
7.27  
7.26  
7.25  
7.23  
6.96  
6.96  
6.95  
6.95  
6.94  
6.93

4.62

3.88  
3.84  
3.77

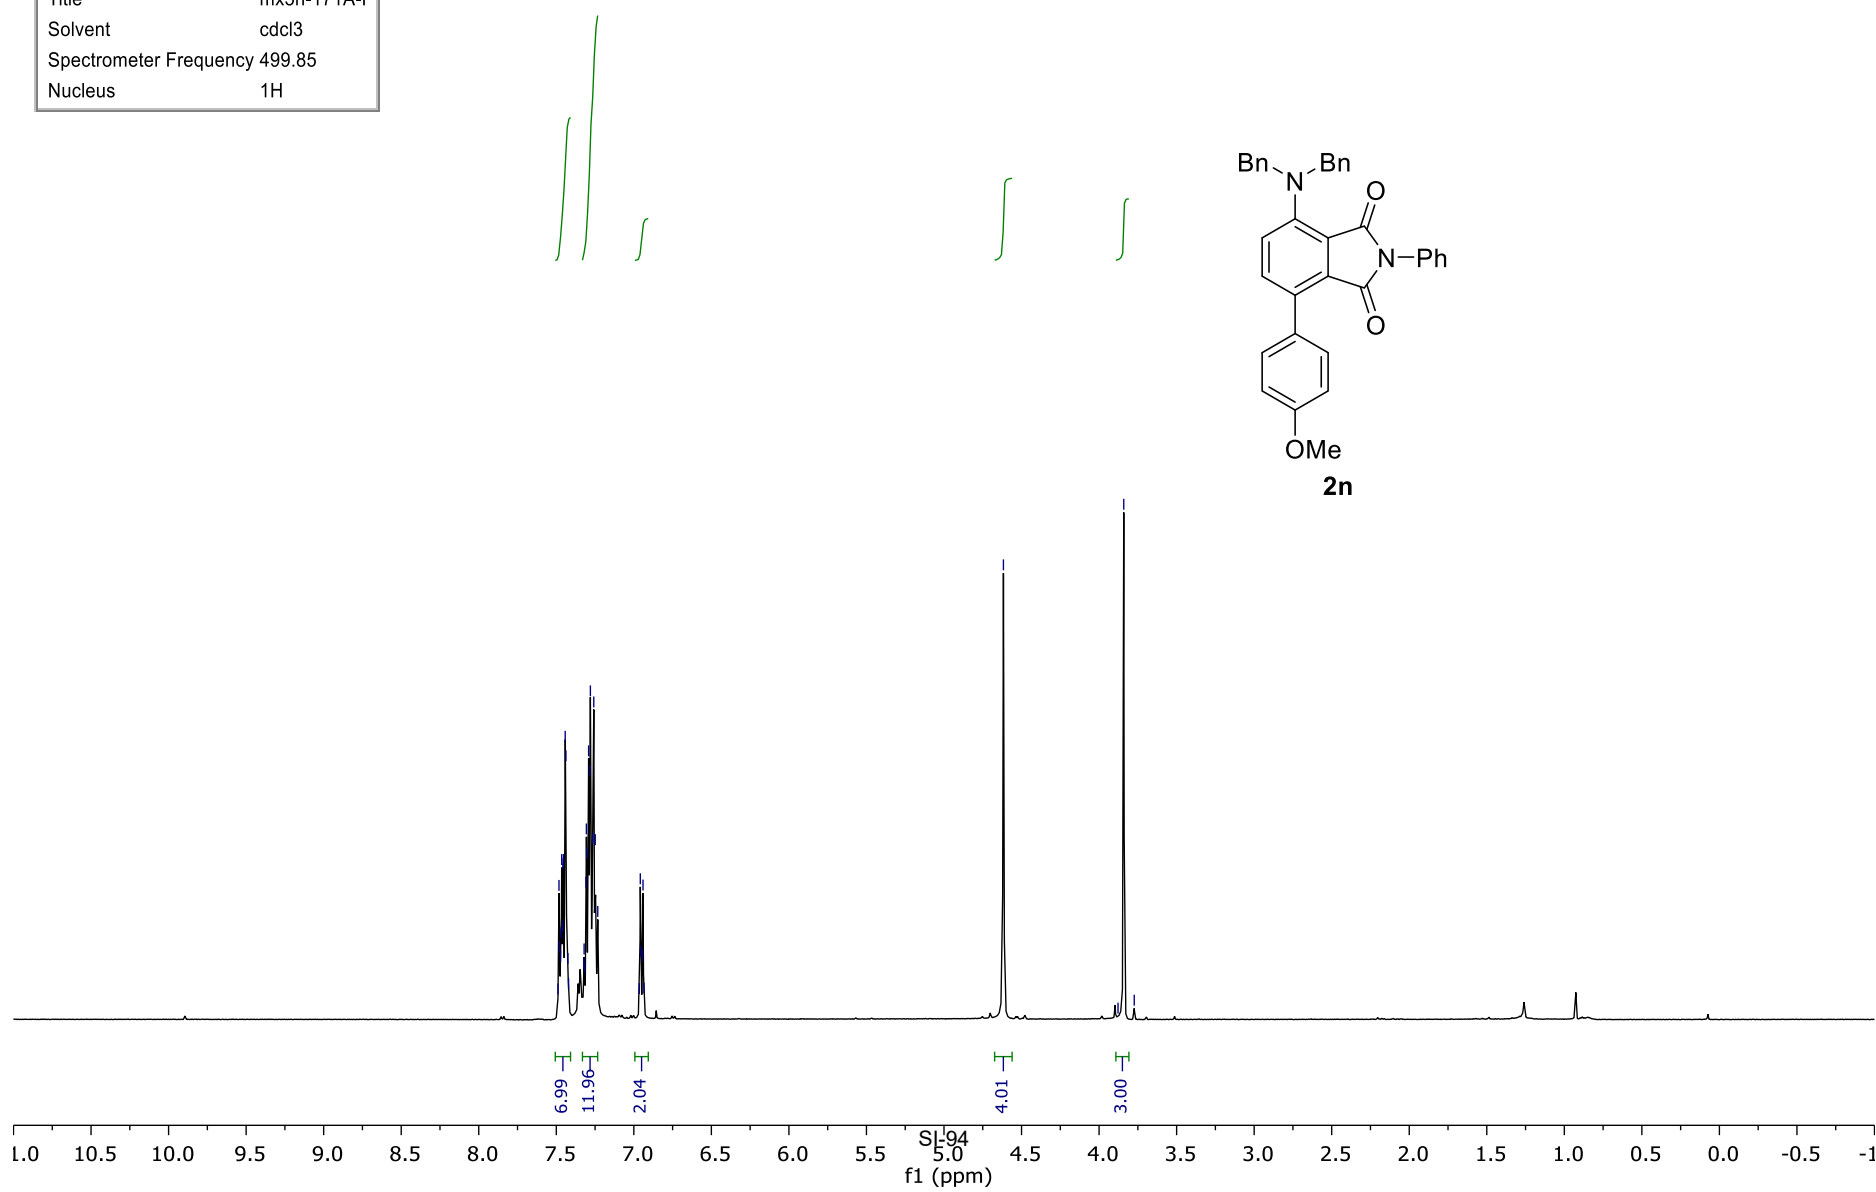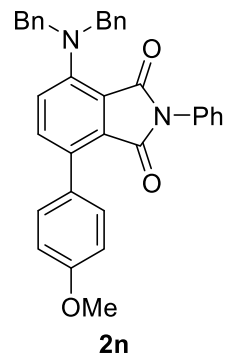

mx5c-171A-Ps3

| Std carbon             | Parameters      |
|------------------------|-----------------|
| Parameter              | Value           |
| Title                  | mx5c-171A-Ps3   |
| Solvent                | cdcl3           |
| Spectrometer Frequency | 125.70          |
| Nucleus                | <sup>13</sup> C |

166.99  
166.42  
159.72  
148.71  
137.76  
137.45  
133.17  
132.10  
130.92  
129.05  
128.98  
128.95  
128.66  
128.17  
127.88  
127.44  
127.10  
125.91  
118.28  
113.50

77.41  
77.16  
76.90

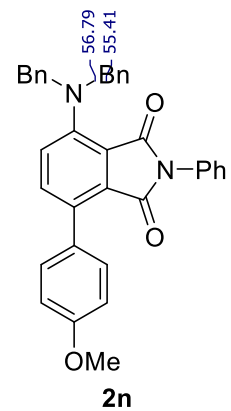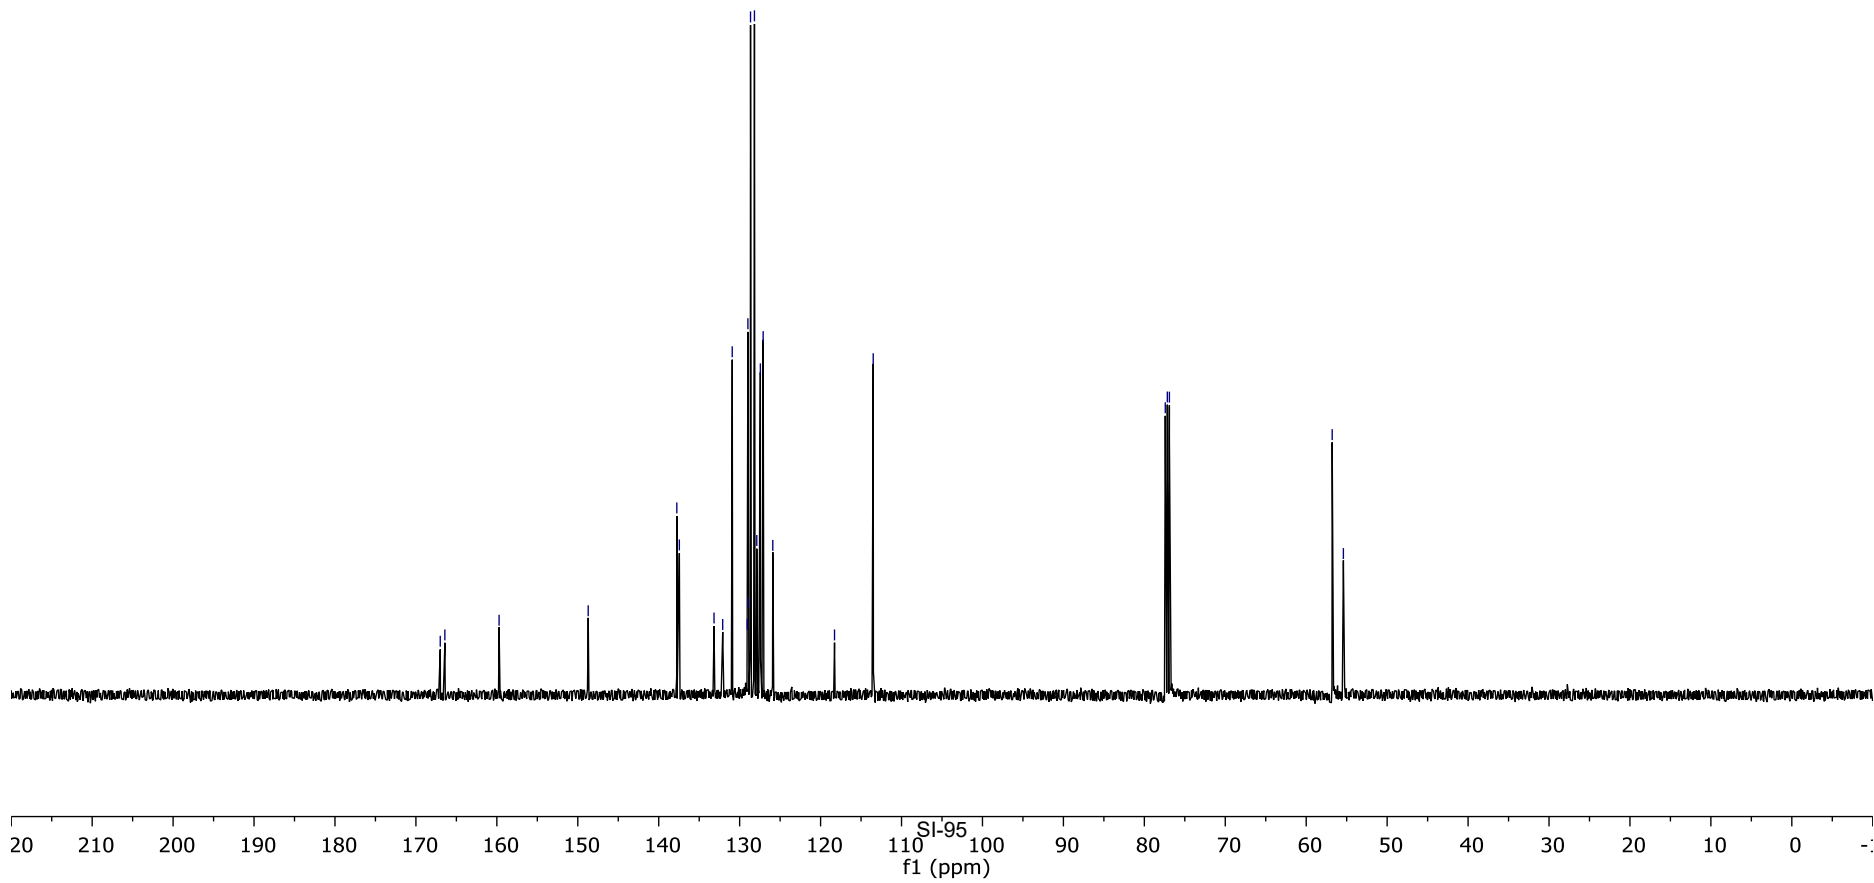

mx5h-179A-P

| Parameters             |             |
|------------------------|-------------|
| Parameter              | Value       |
| Title                  | mx5h-179A-P |
| Solvent                | cdcl3       |
| Spectrometer Frequency | 499.85      |
| Nucleus                | 1H          |

— 1.56 Water

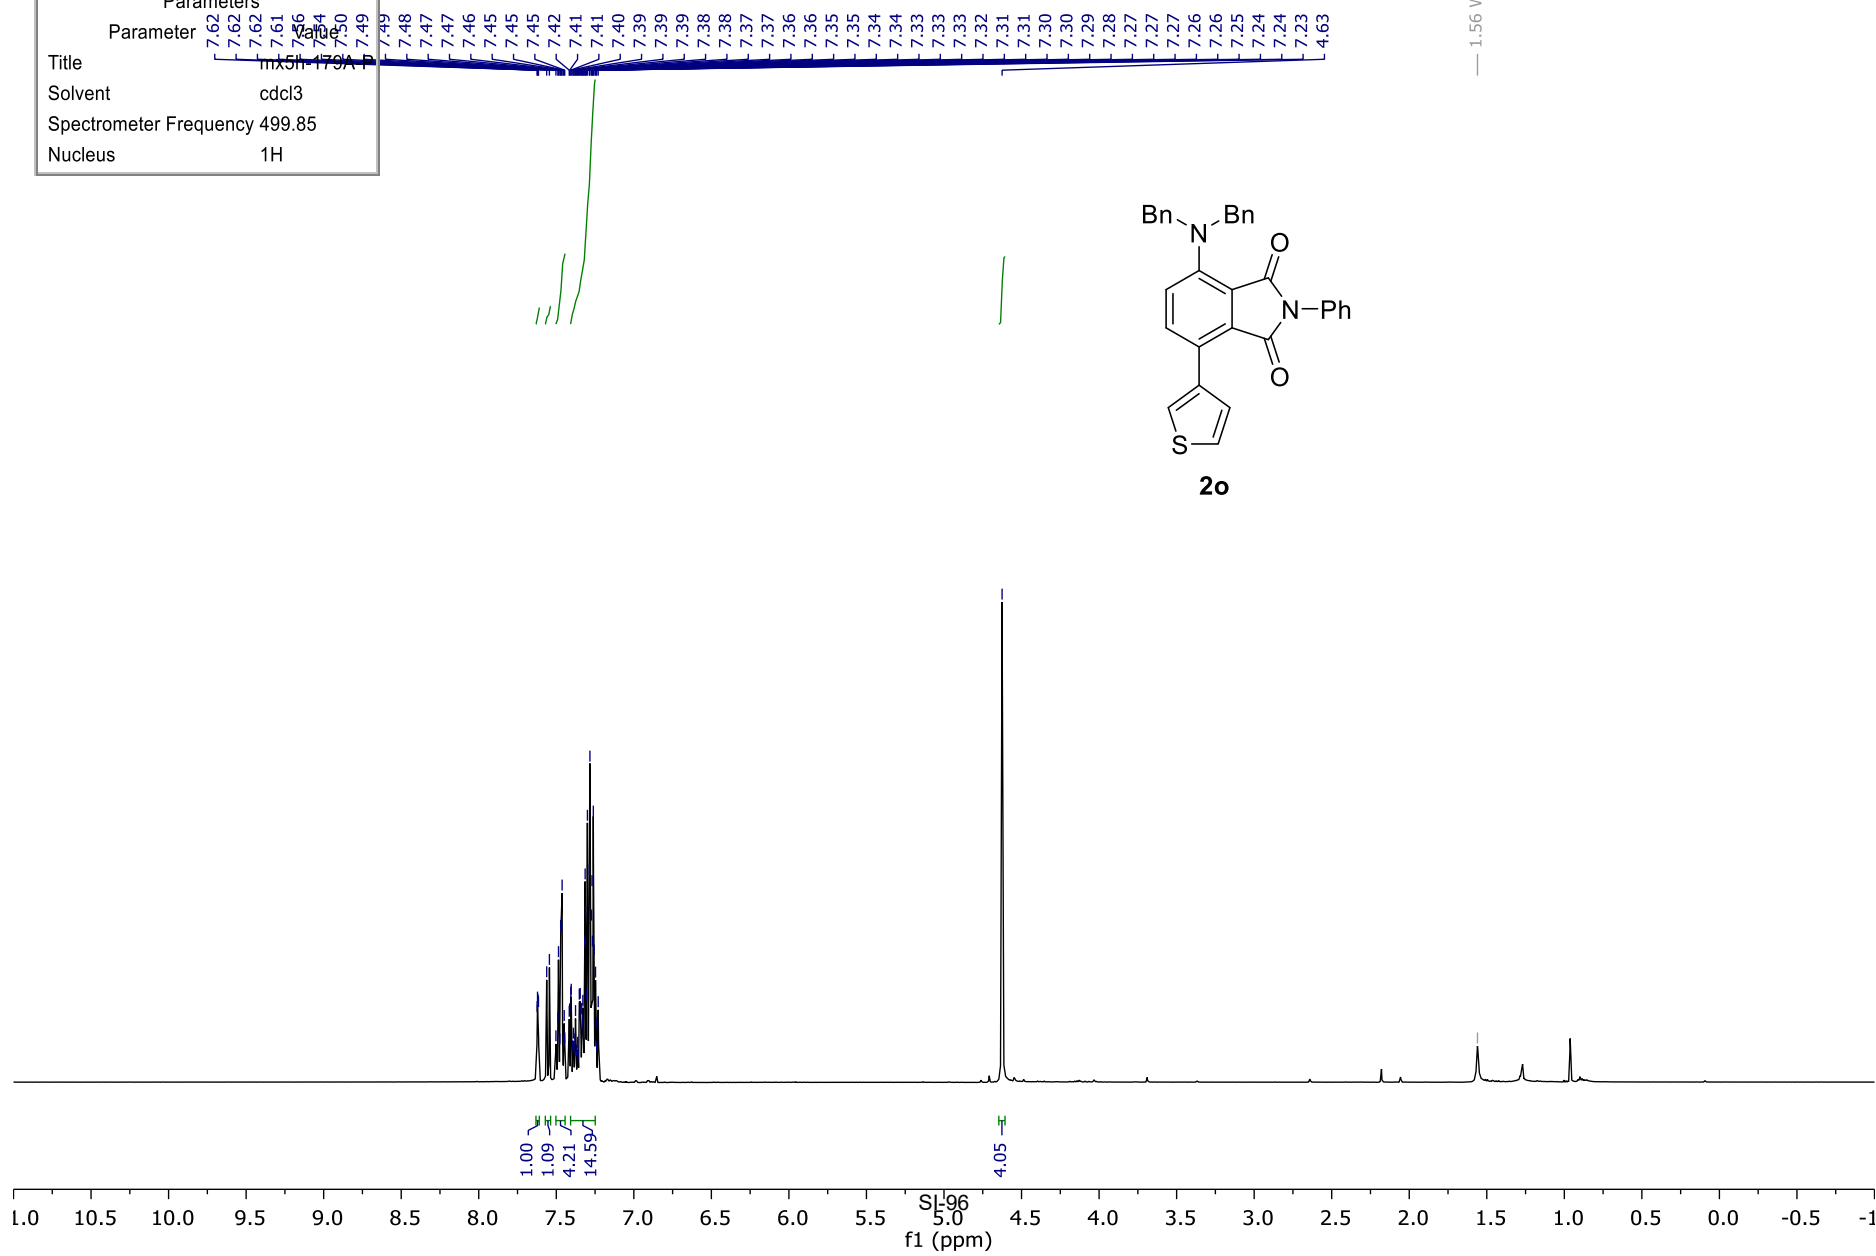



mx5c-179A-P

| Std carbon | Parameters             | Value       |
|------------|------------------------|-------------|
|            | Parameter              | Value       |
|            | Title                  | mx5c-179A-P |
|            | Solvent                | cdcl3       |
|            | Spectrometer Frequency | 125.70      |
|            | Nucleus                | 13C         |

167.02  
166.35

148.88  
137.67  
137.19  
137.03  
132.06  
129.27  
129.12  
129.06  
128.68  
128.16  
128.00  
127.72  
127.48  
127.12  
125.98  
124.97  
124.66

77.41  
77.16  
76.91

56.82

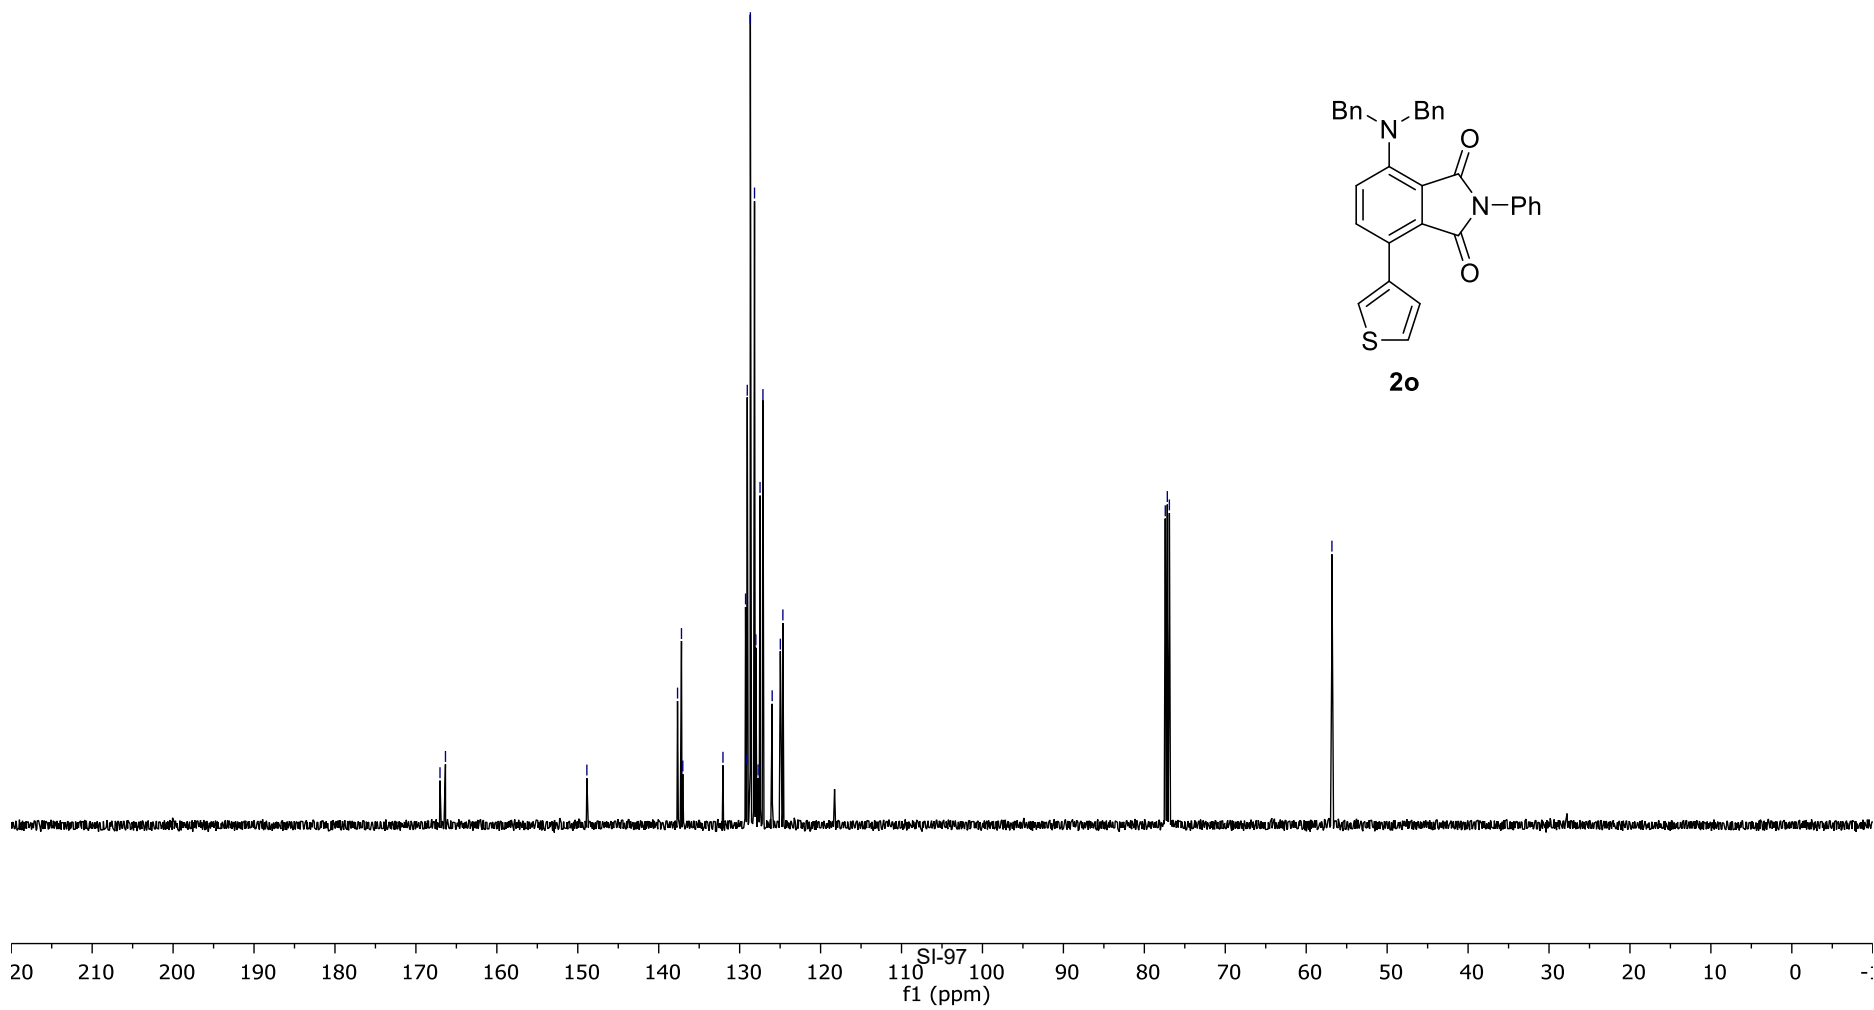

xg-3-69A-

| Parameter                | Value     |
|--------------------------|-----------|
| 1 Title                  | xg-3-69A- |
| 2 Solvent                | cdcl3     |
| 3 Relaxation Delay       | 4.8000    |
| 4 Spectrometer Frequency | 399.78    |
| 5 Nucleus                | 1H        |

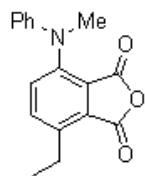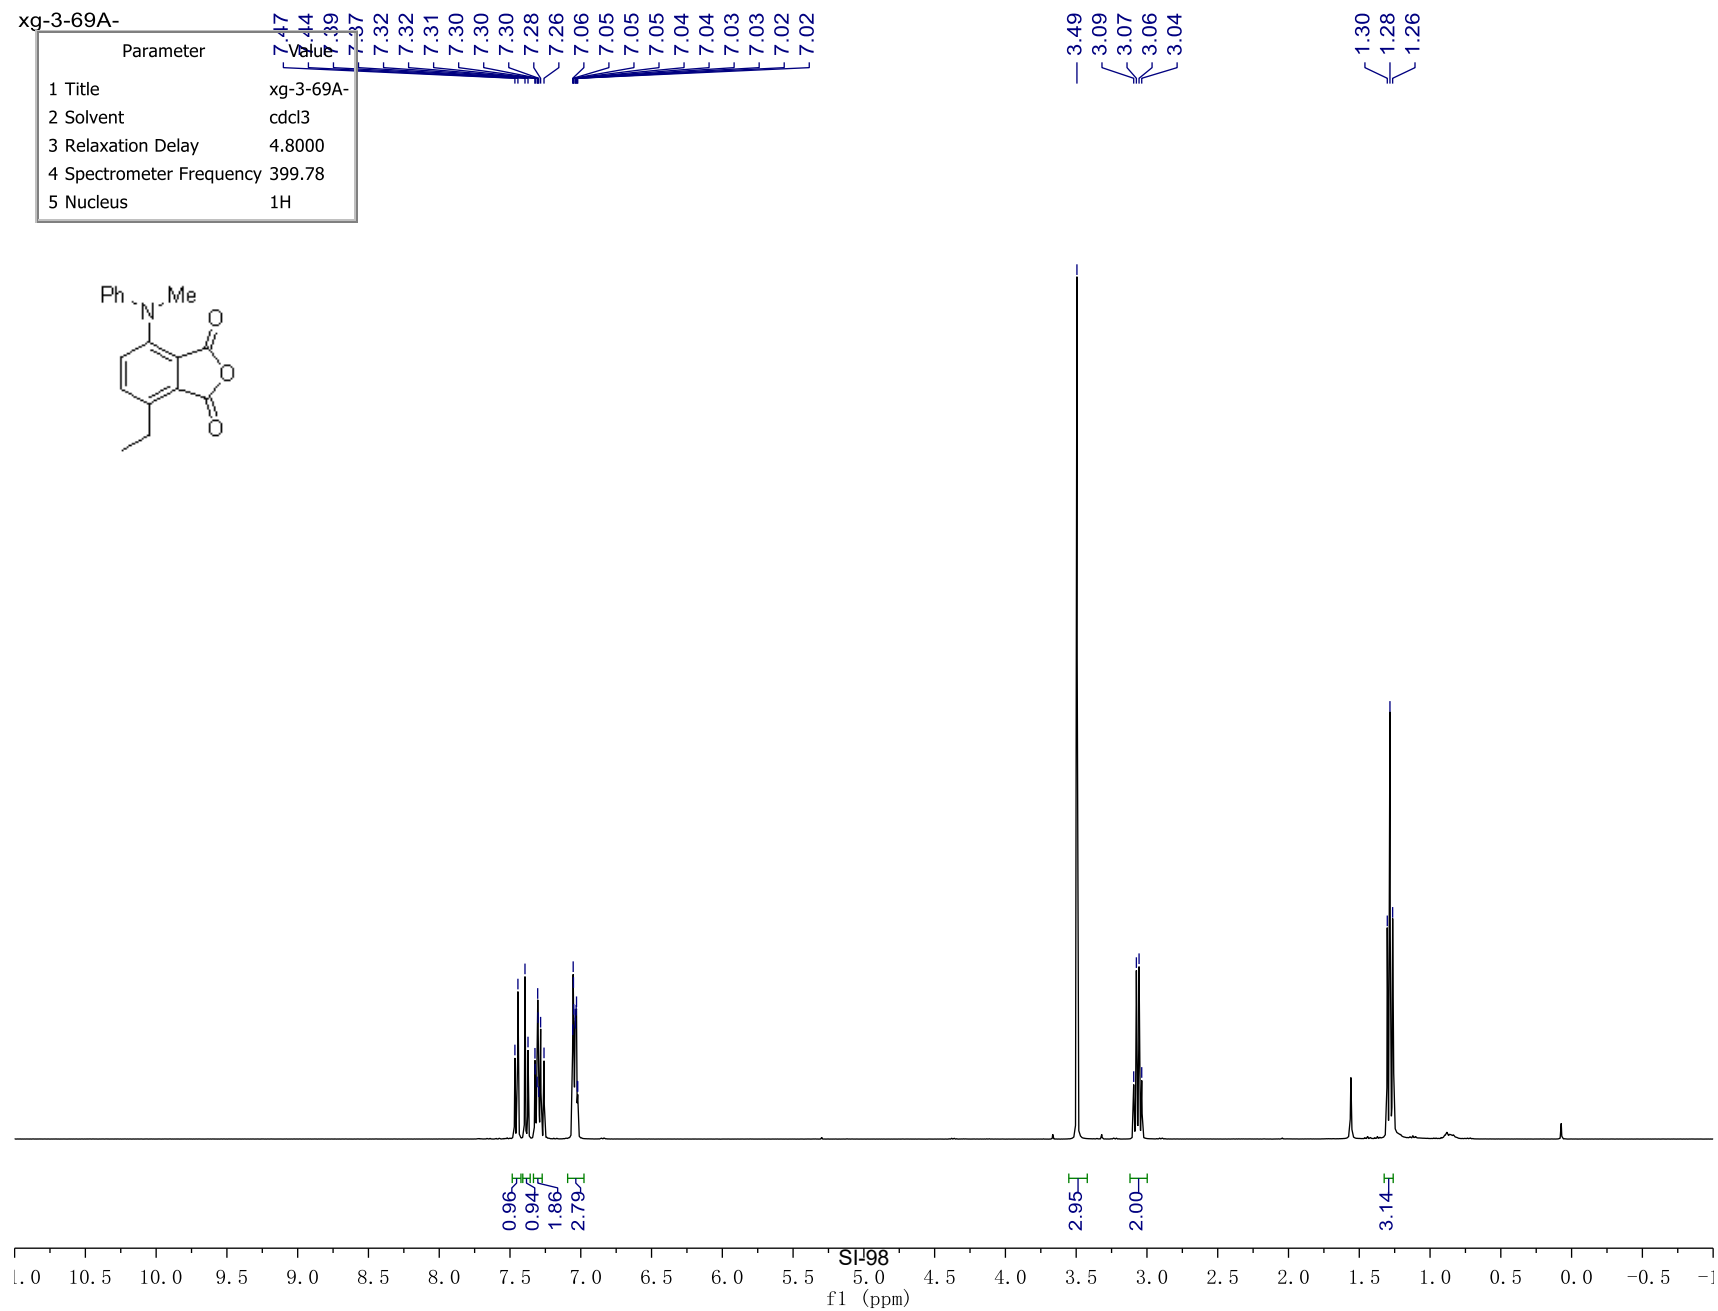

xg-3-69A-c13-

| Parameter                | Value         |
|--------------------------|---------------|
| 1 Title                  | xg-3-69A-c13- |
| 2 Solvent                | cdcl3         |
| 3 Relaxation Delay       | 1.0000        |
| 4 Spectrometer Frequency | 100.53        |
| 5 Nucleus                | 13C           |

163.31  
160.95

147.70  
147.57  
140.17  
137.53  
131.05  
129.59  
129.34  
123.00  
120.24  
119.59

77.48  
77.16  
76.84

41.76

24.15

14.82

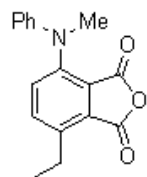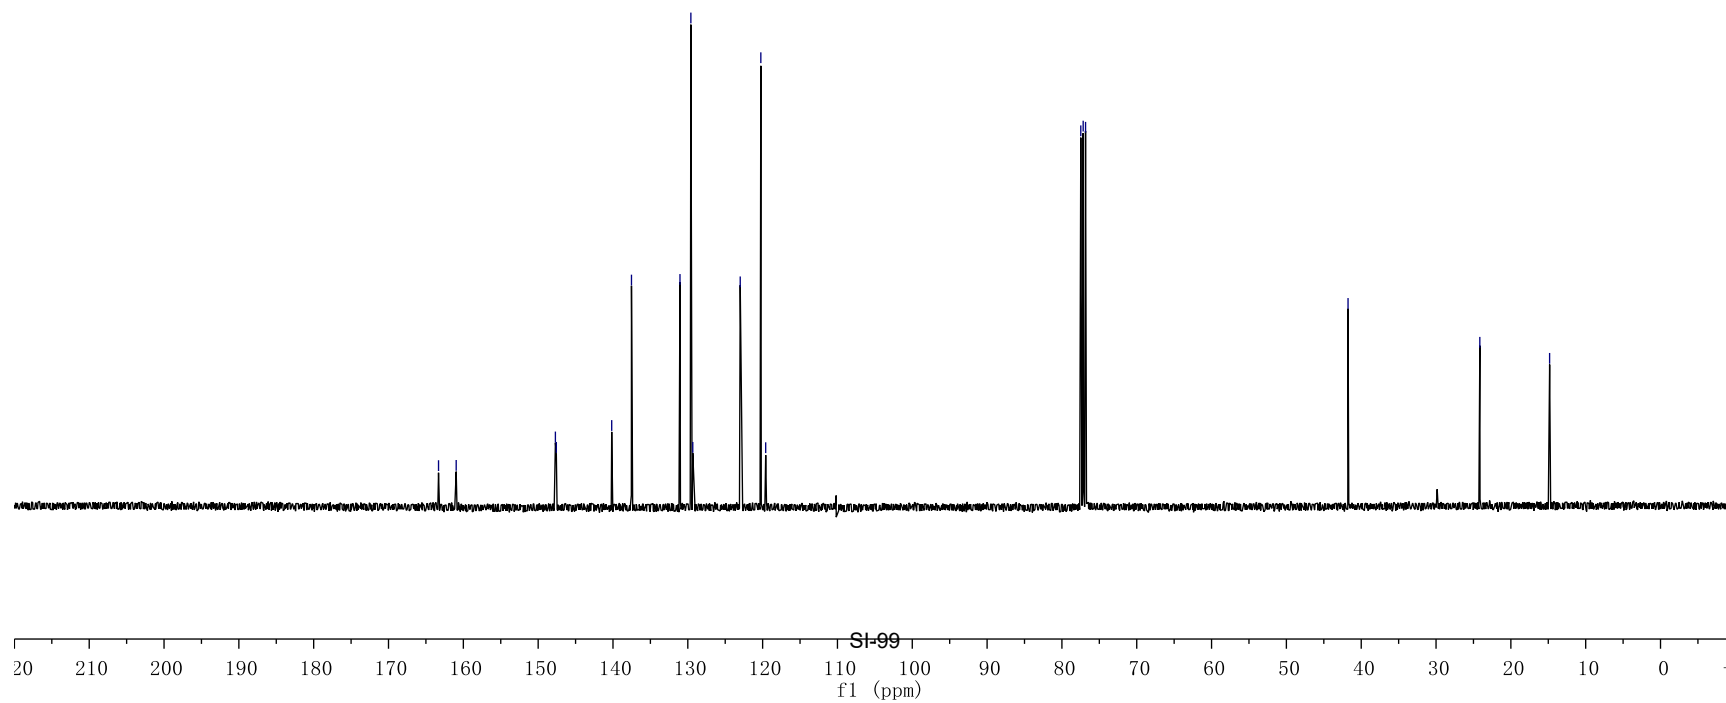

mx5h-170B-PFinal

| Parameters             |                  |
|------------------------|------------------|
| Parameter              | Value            |
| Title                  | mx5h-170B-PFinal |
| Solvent                | cdcl3            |
| Spectrometer Frequency | 499.85           |
| Nucleus                | 1H               |

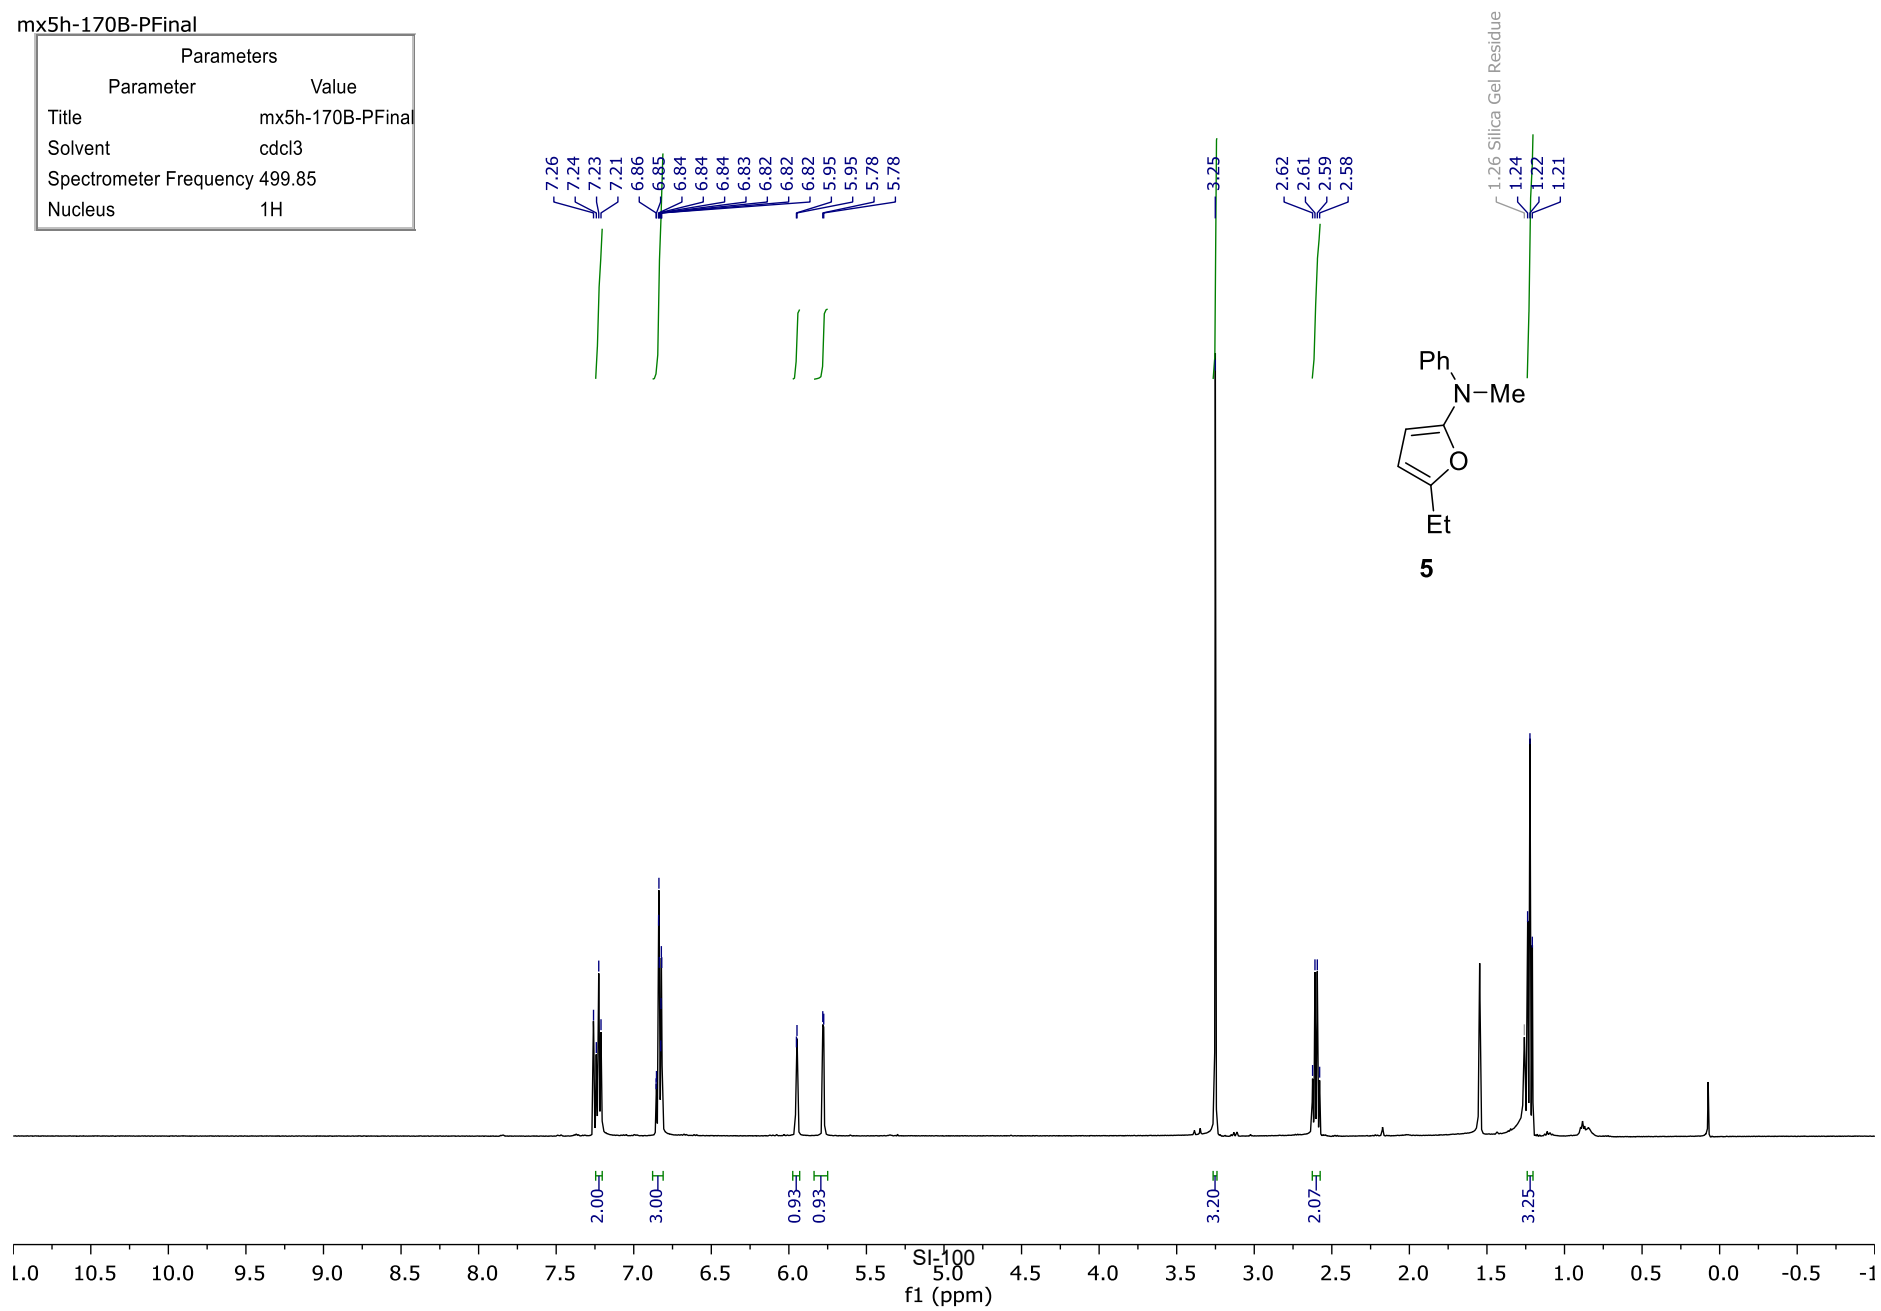

mx5c-170B-PFinal

| Std carbon             | Parameters       | Value |
|------------------------|------------------|-------|
| Title                  | mx5c-170B-PFinal |       |
| Solvent                | cdcl3            |       |
| Spectrometer Frequency | 125.70           |       |
| Nucleus                | 13C              |       |

153.00  
152.67  
148.11

129.04

119.44

114.95

104.78

99.32

39.17

29.86 Silica Gel Residue

21.65

12.24

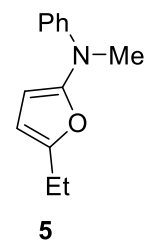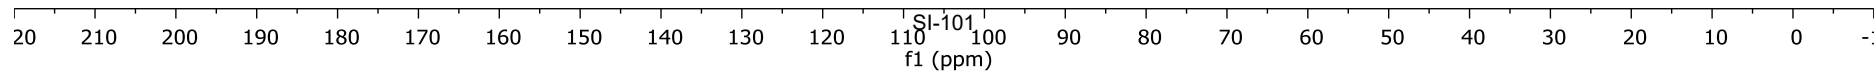

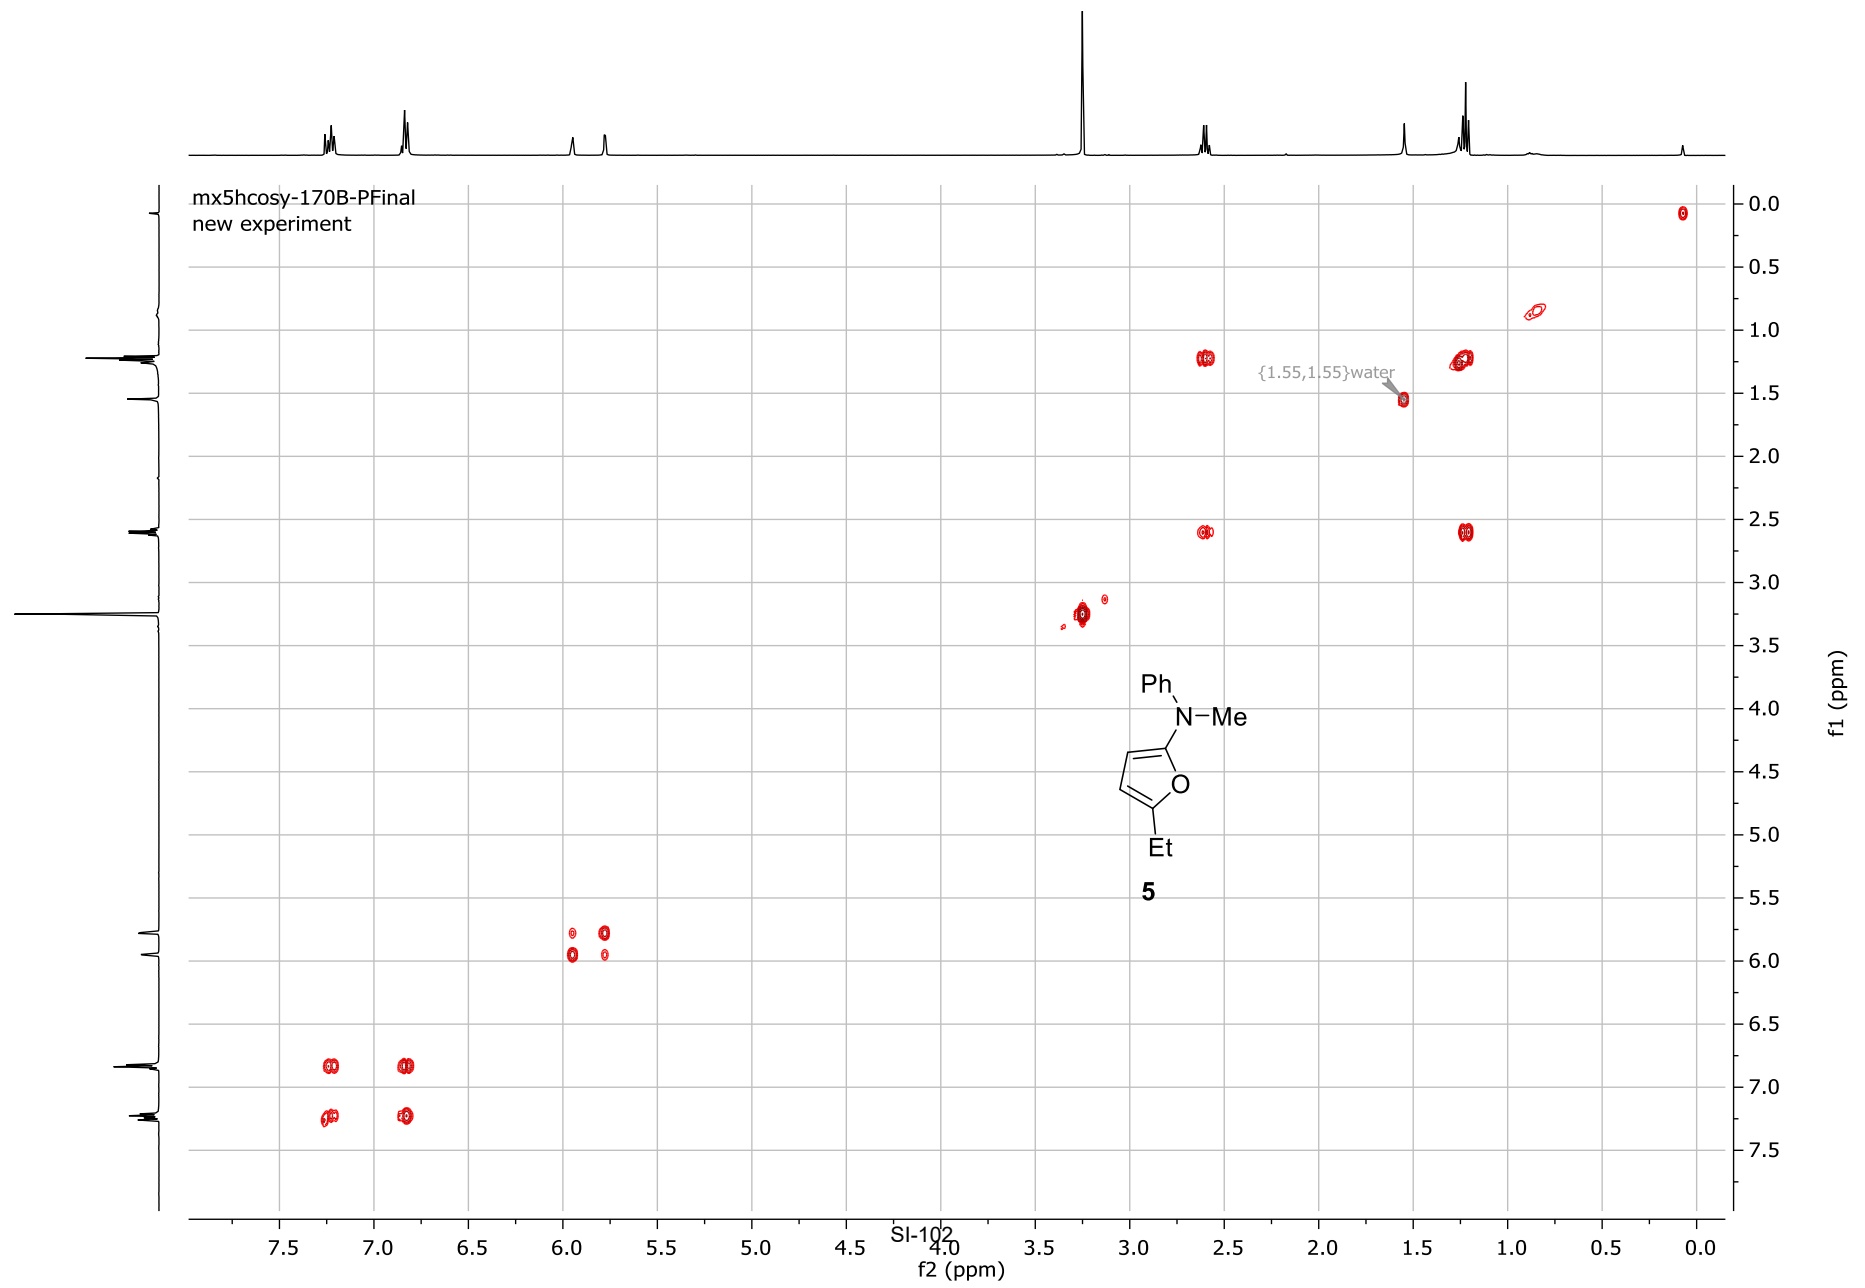

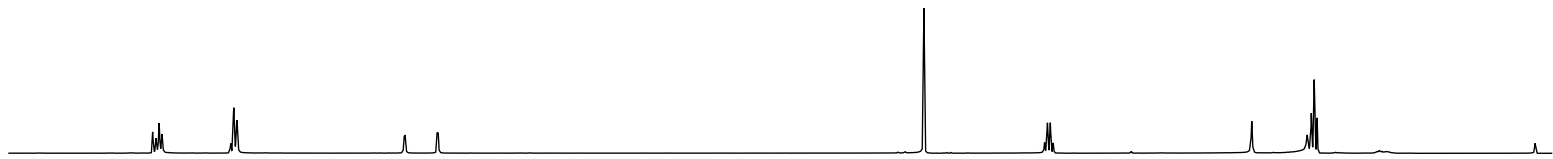

mx5hsqc-170B-PFinal  
new experiment

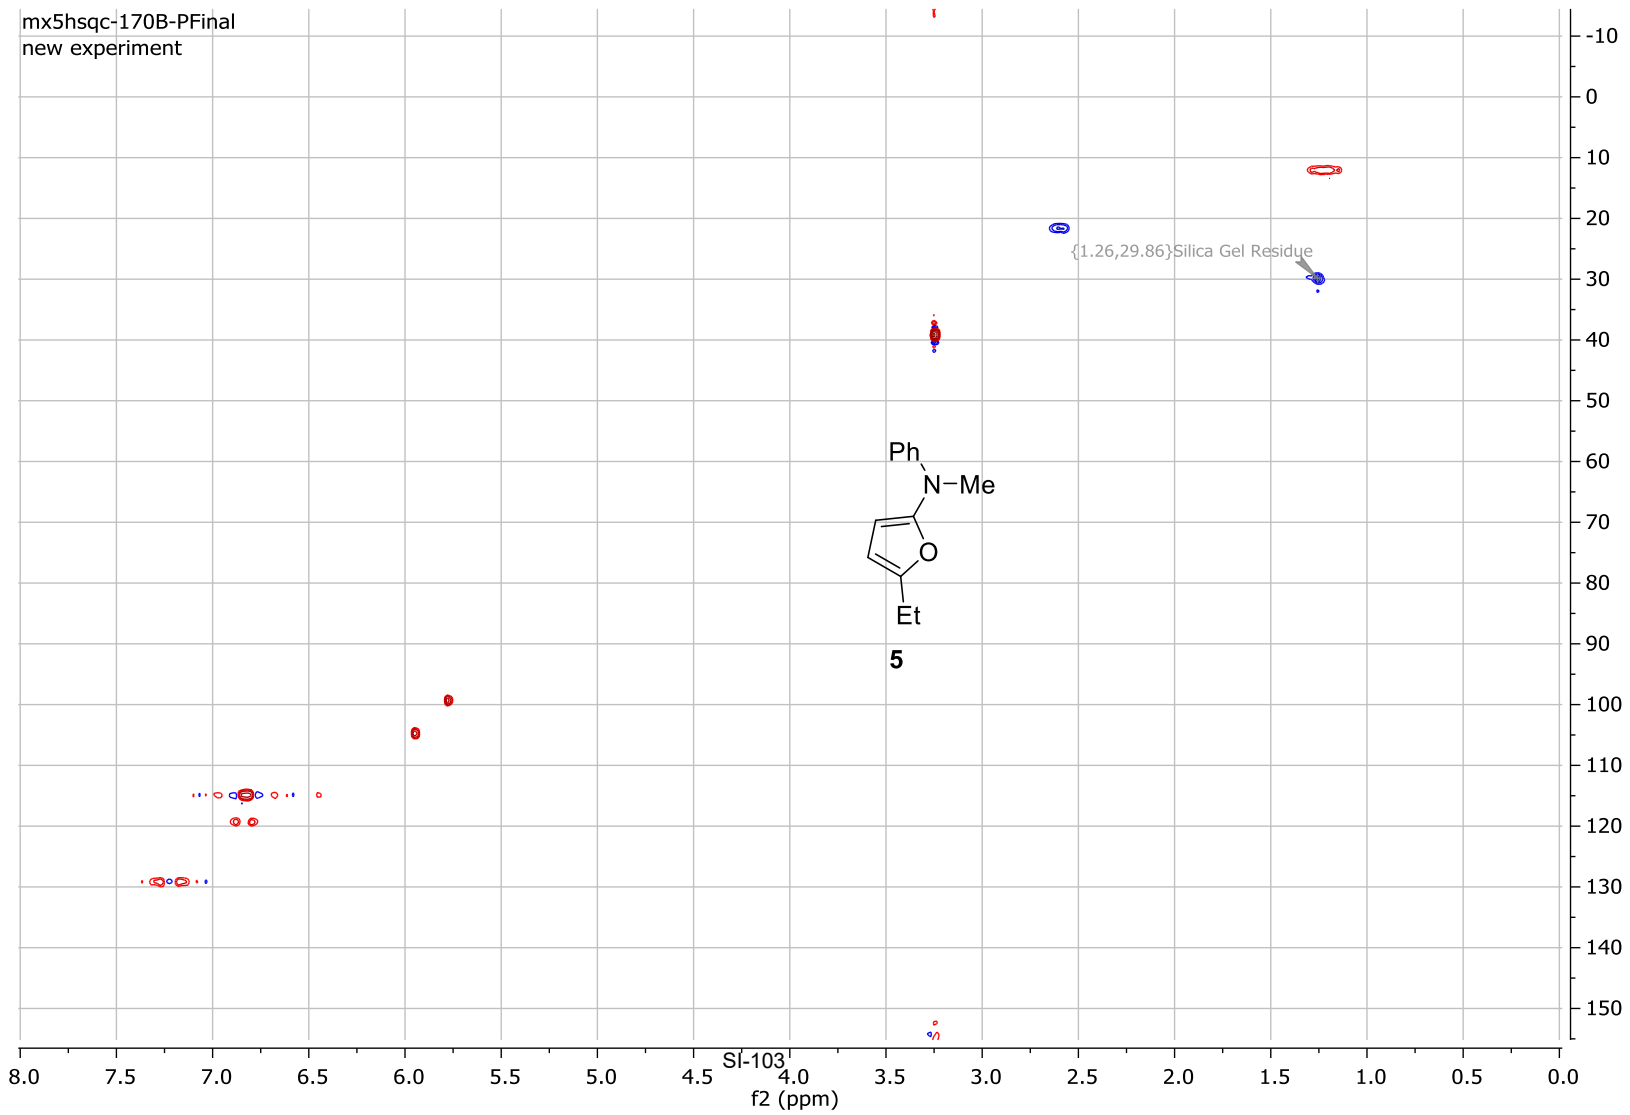

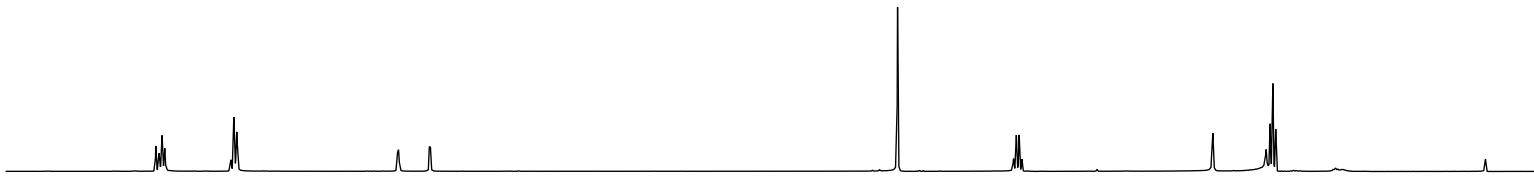

mx5hmbc-170B-PFfinal  
1H-13C gHMBC

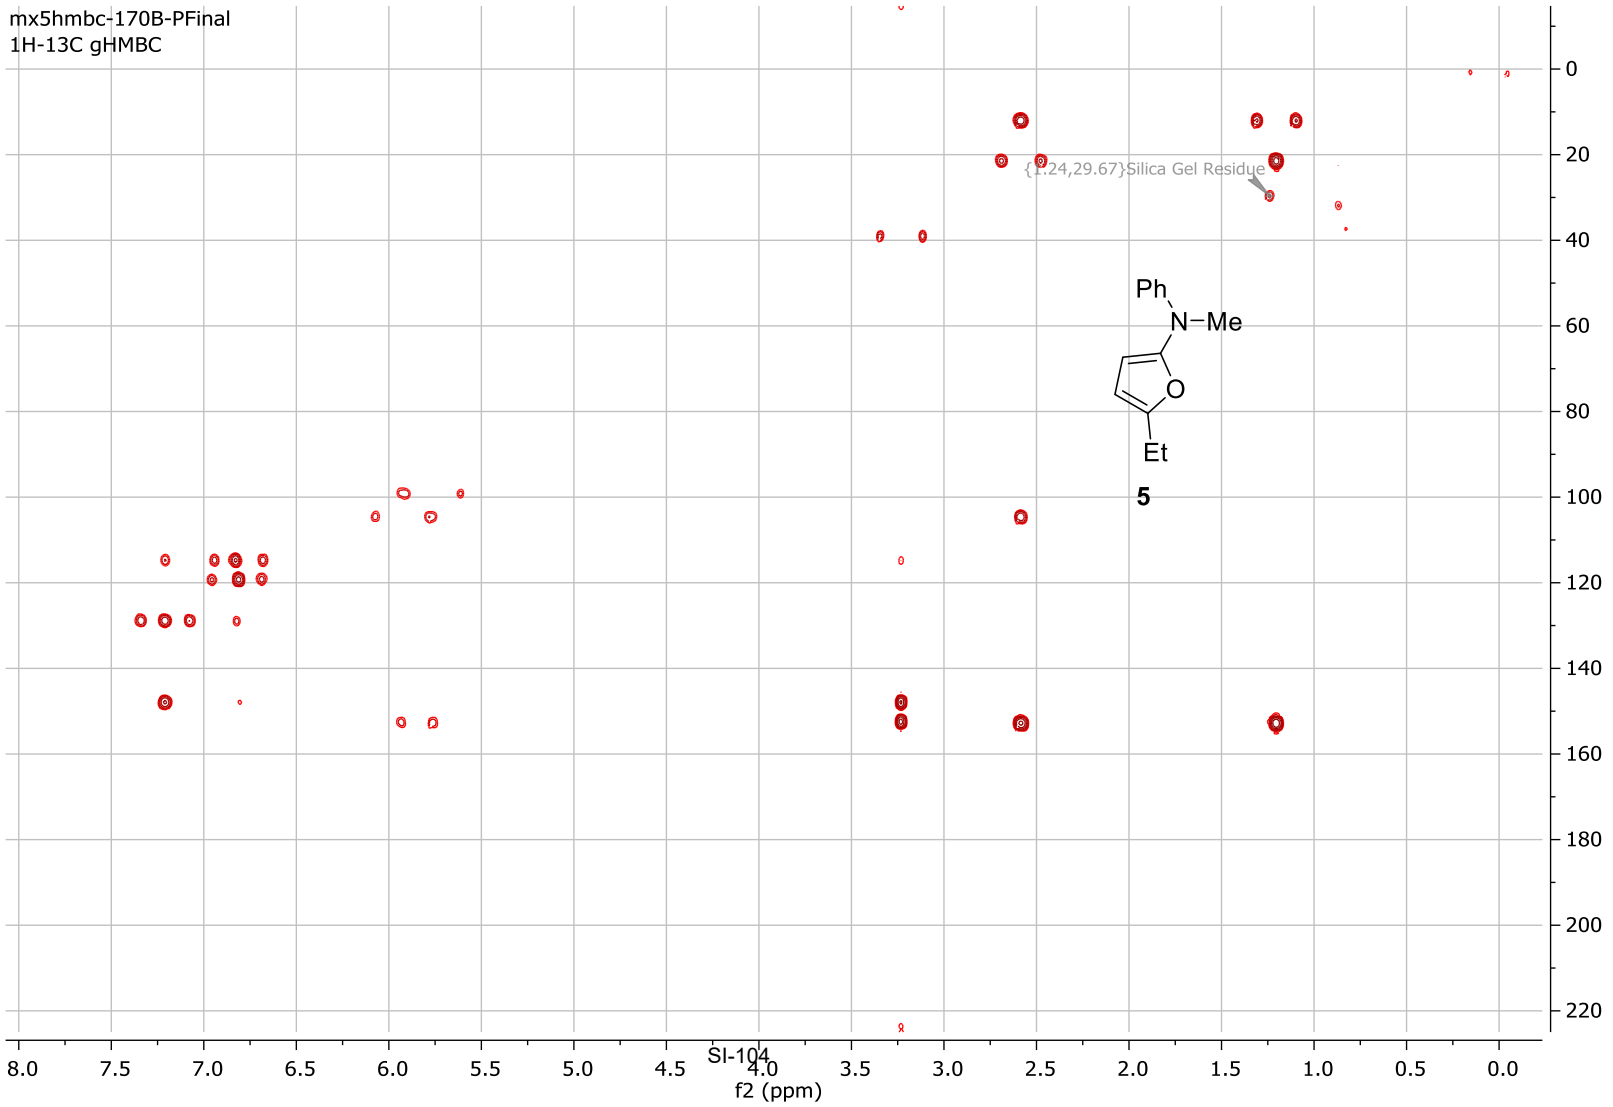



mx4h-195A-P

| Parameters             |             |
|------------------------|-------------|
| Title                  | mx4h-195A-P |
| Author                 | vnmr1       |
| Solvent                | cdcl3       |
| Spectrometer Frequency | 499.85      |
| Nucleus                | 1H          |

8.81  
8.81  
8.70  
7.47  
7.46  
7.44  
7.42  
7.41  
7.40  
7.39  
7.38  
7.37  
7.36  
7.36  
7.36  
7.35  
7.35  
7.35  
7.26  
6.55

5.29 DCM

3.65

3.41

2.16

2.14

0.98

0.97

0.95

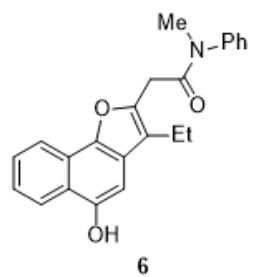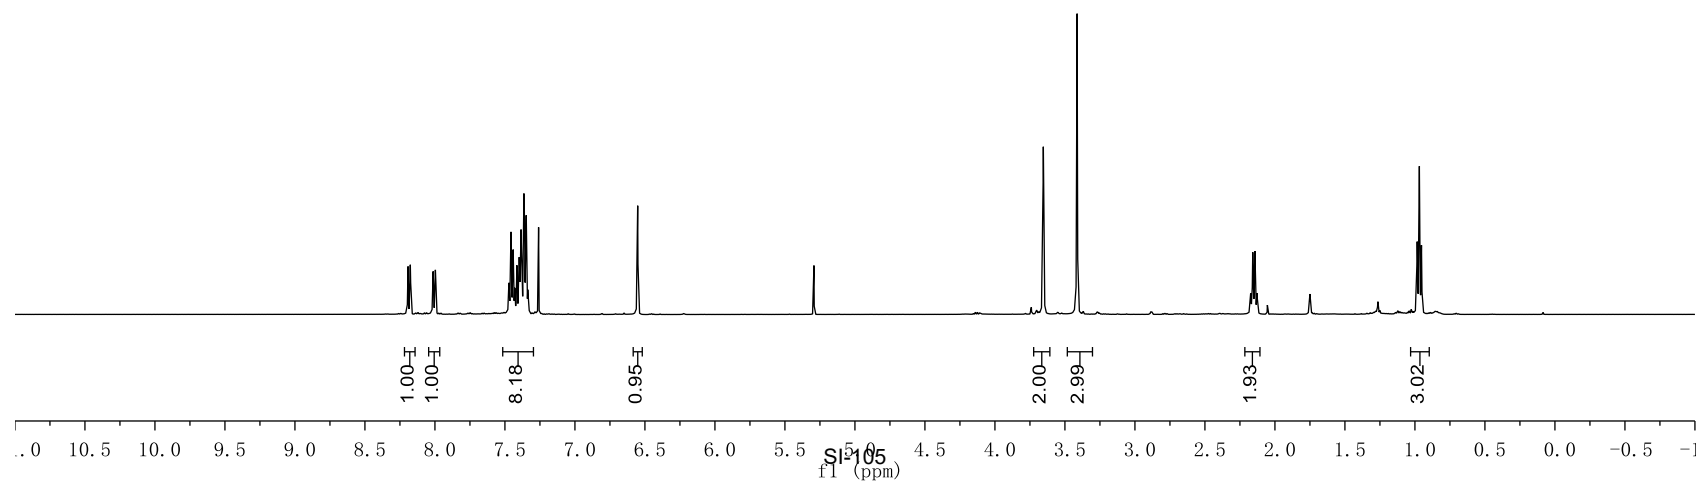

mx4c-195A-Ps5

— 169.87

147.91  
145.41  
144.36  
143.74  
130.11  
128.38  
127.56  
126.05  
123.78  
123.68  
123.08  
122.96  
121.33  
120.30  
119.71

77.41  
77.16  
76.91

— 38.22  
— 32.70

— 16.70  
— 14.60

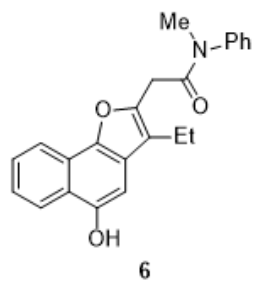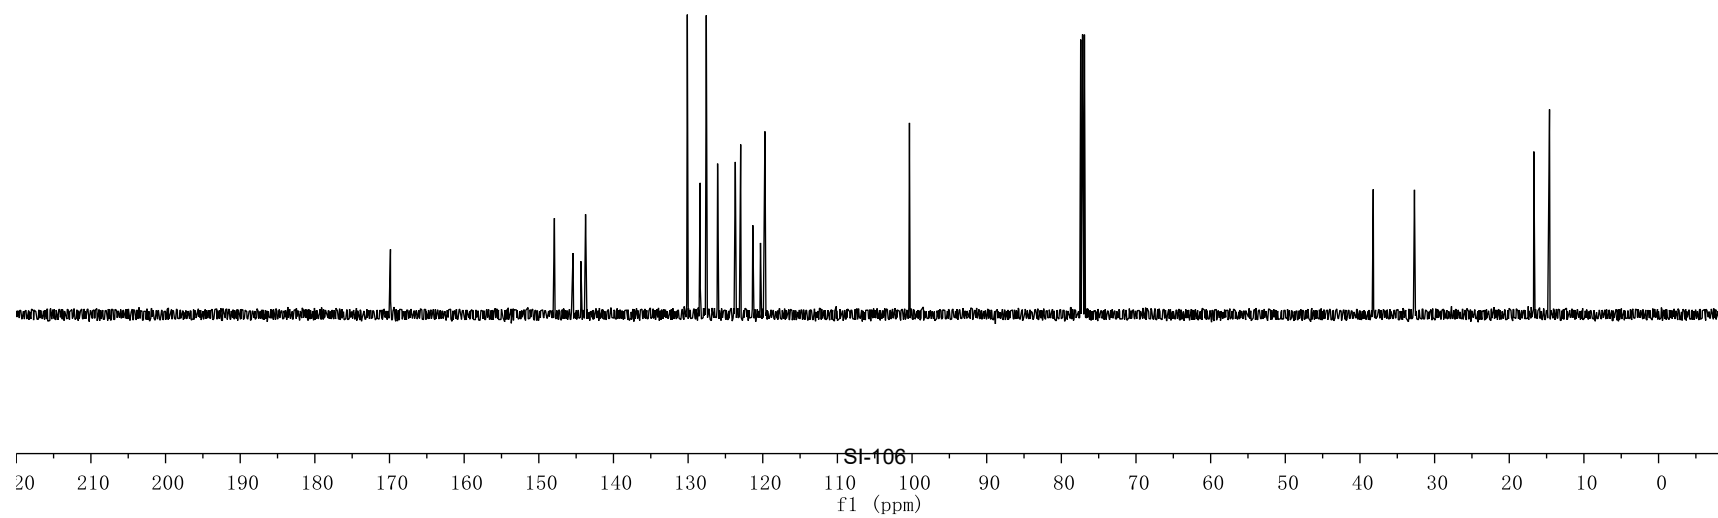

xg-2-243B-h

| Parameters             |             |
|------------------------|-------------|
| Parameter              | Value       |
| Title                  | xg-2-243B-h |
| Author                 | vnmr1       |
| Solvent                | CDCl3       |
| Spectrometer Frequency | 499.86      |
| Nucleus                | 1H          |

7.31  
7.30  
7.29  
7.27  
7.26  
7.25  
7.22  
7.22  
7.21  
7.21  
7.20  
7.19  
7.16  
7.15  
7.11  
7.09

4.49  
4.48  
4.48  
4.47  
4.46  
4.45  
4.16

2.96  
2.95  
2.93

1.36  
1.35  
1.33

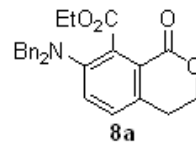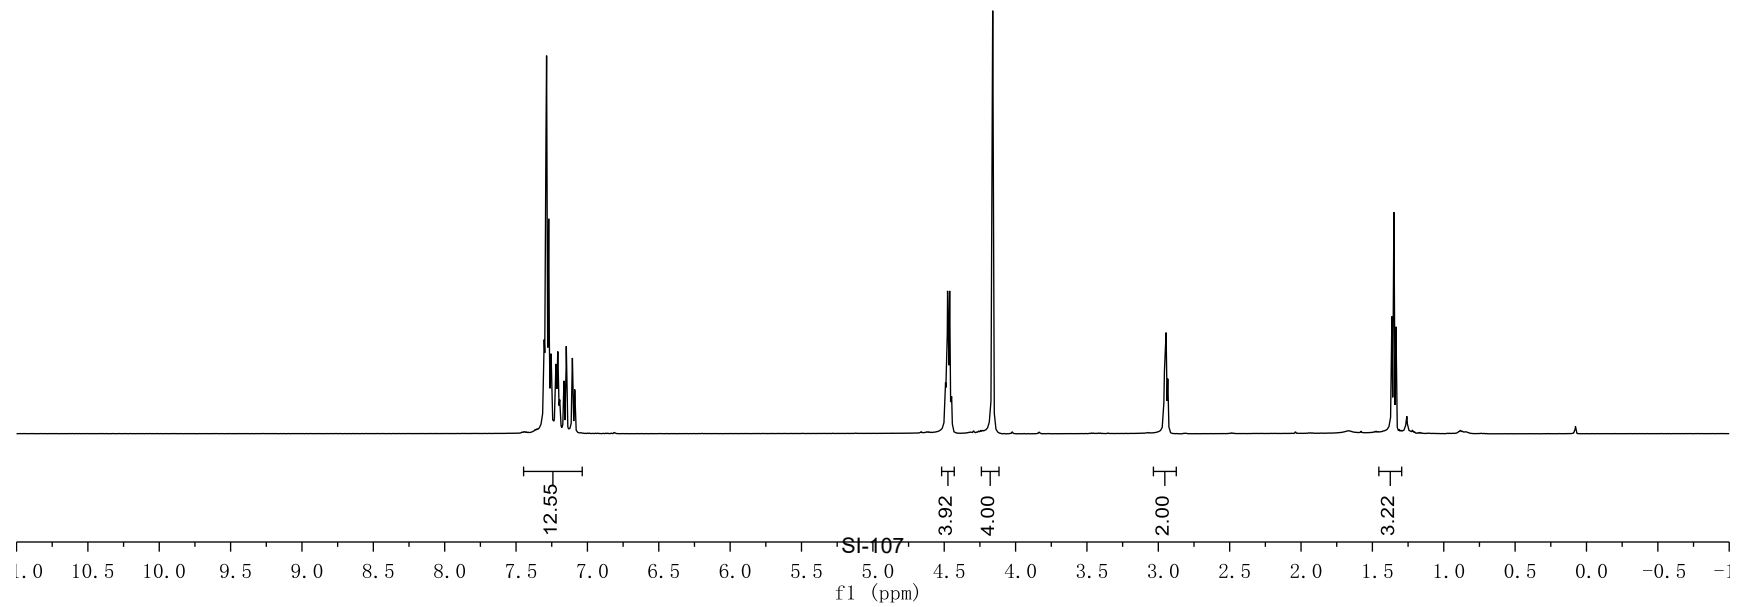

xg-2-243B-c13

| Parameters             |               |
|------------------------|---------------|
| Parameter              | Value         |
| Title                  | xg-2-243B-c13 |
| Author                 |               |
| Solvent                | CDCl3         |
| Spectrometer Frequency | 125.70        |
| Nucleus                | 13C           |

168.40  
163.31  
148.43  
137.68  
135.50  
135.08  
129.14  
128.75  
128.35  
128.25  
127.23  
123.45

77.41  
77.16  
76.91  
67.10  
61.99  
57.96

27.79

14.01

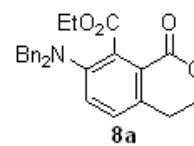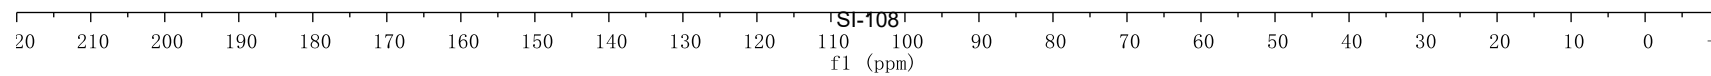

mx4h-189-8bPurified

| Parameter              | Value               |
|------------------------|---------------------|
| Title                  | mx4h-189-8bPurified |
| Author                 | vnmr1               |
| Solvent                | cdcl3               |
| Spectrometer Frequency | 499.85              |
| Nucleus                | 1H                  |

8.90 8.90 8.90 8.88 8.88 8.88 7.88 7.88 7.86 7.86 7.60 7.60 7.59 7.59 7.54 7.54 7.53 7.53 7.52 7.52 7.50 7.50 7.48 7.48 7.43 7.43 7.41 7.41 7.30 7.30 7.29 7.29 7.28 7.28 7.27 7.27 7.26 7.26 4.08 3.86

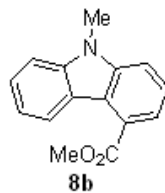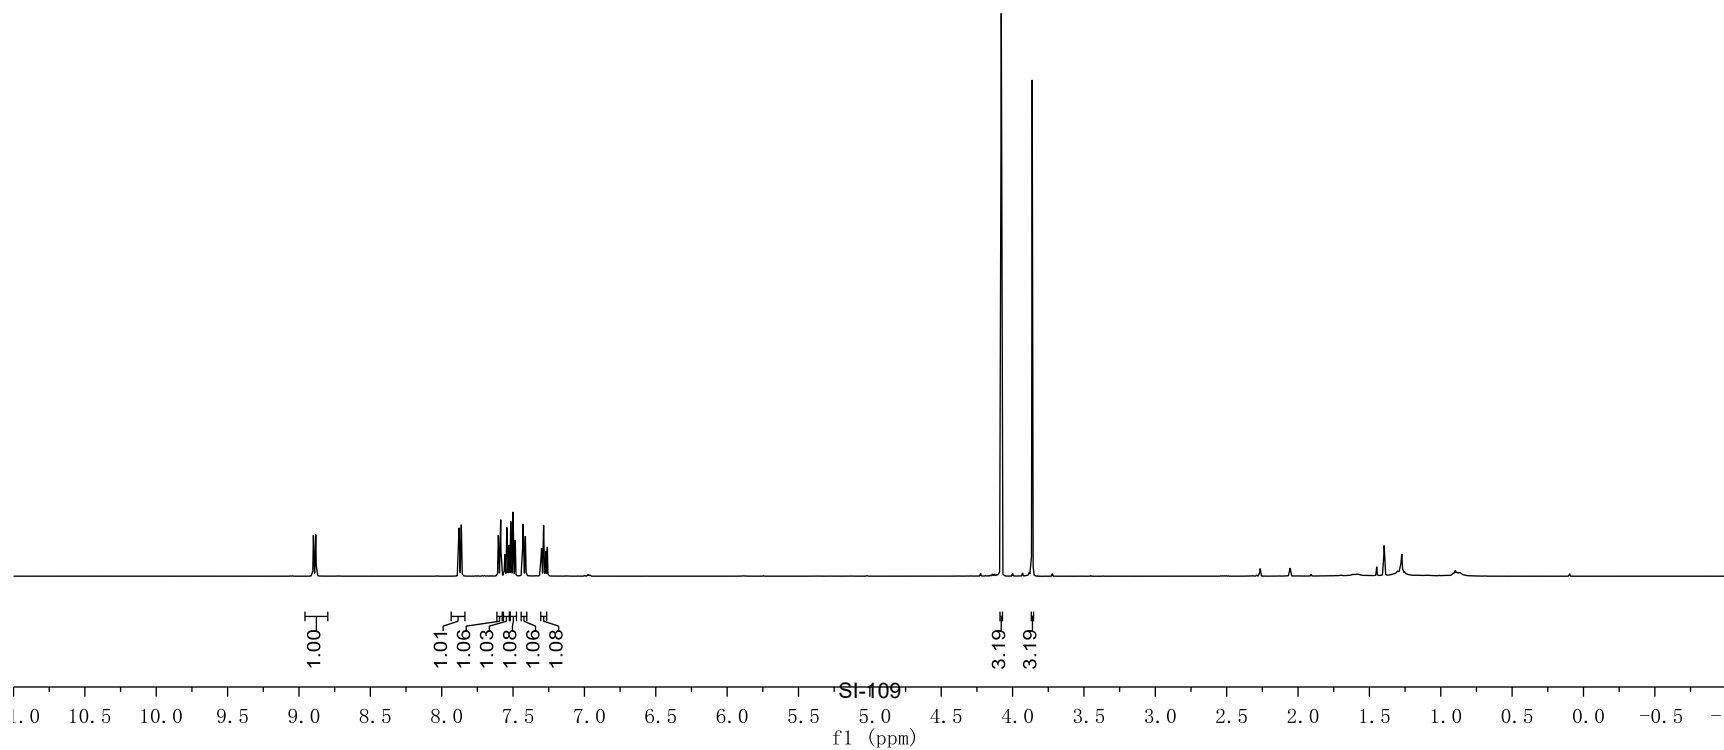

mx4c-189-8b-again

| Parameters             |                   |
|------------------------|-------------------|
| Parameter              | Value             |
| Title                  | mx4c-189-8b-again |
| Author                 |                   |
| Solvent                | cdcl3             |
| Spectrometer Frequency | 125.70            |
| Nucleus                | <sup>13</sup> C   |

141.84  
141.78  
126.83  
125.74  
125.37  
124.68  
122.21  
121.48  
121.48  
119.39  
112.74  
108.33

77.41  
77.16  
76.91

52.26

29.27

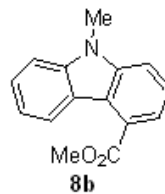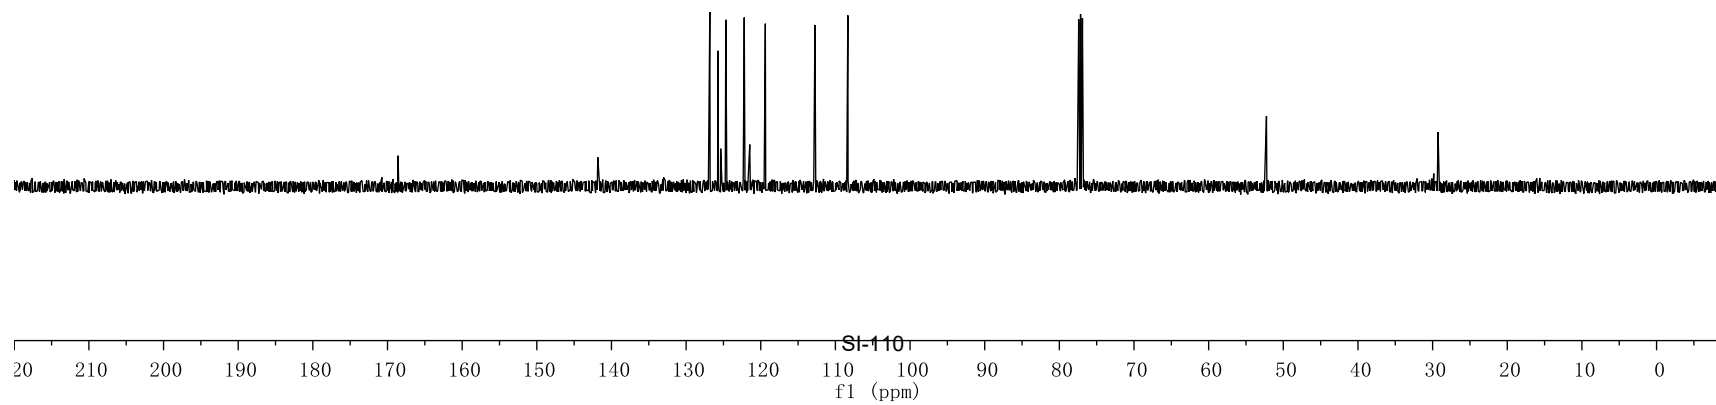

mx4h-189-8c

| Parameters             |             |
|------------------------|-------------|
| Parameter              | Value       |
| Title                  | mx4h-189-8c |
| Author                 |             |
| Solvent                | cdcl3       |
| Spectrometer Frequency | 399.78      |
| Nucleus                | 1H          |

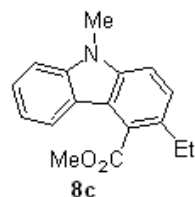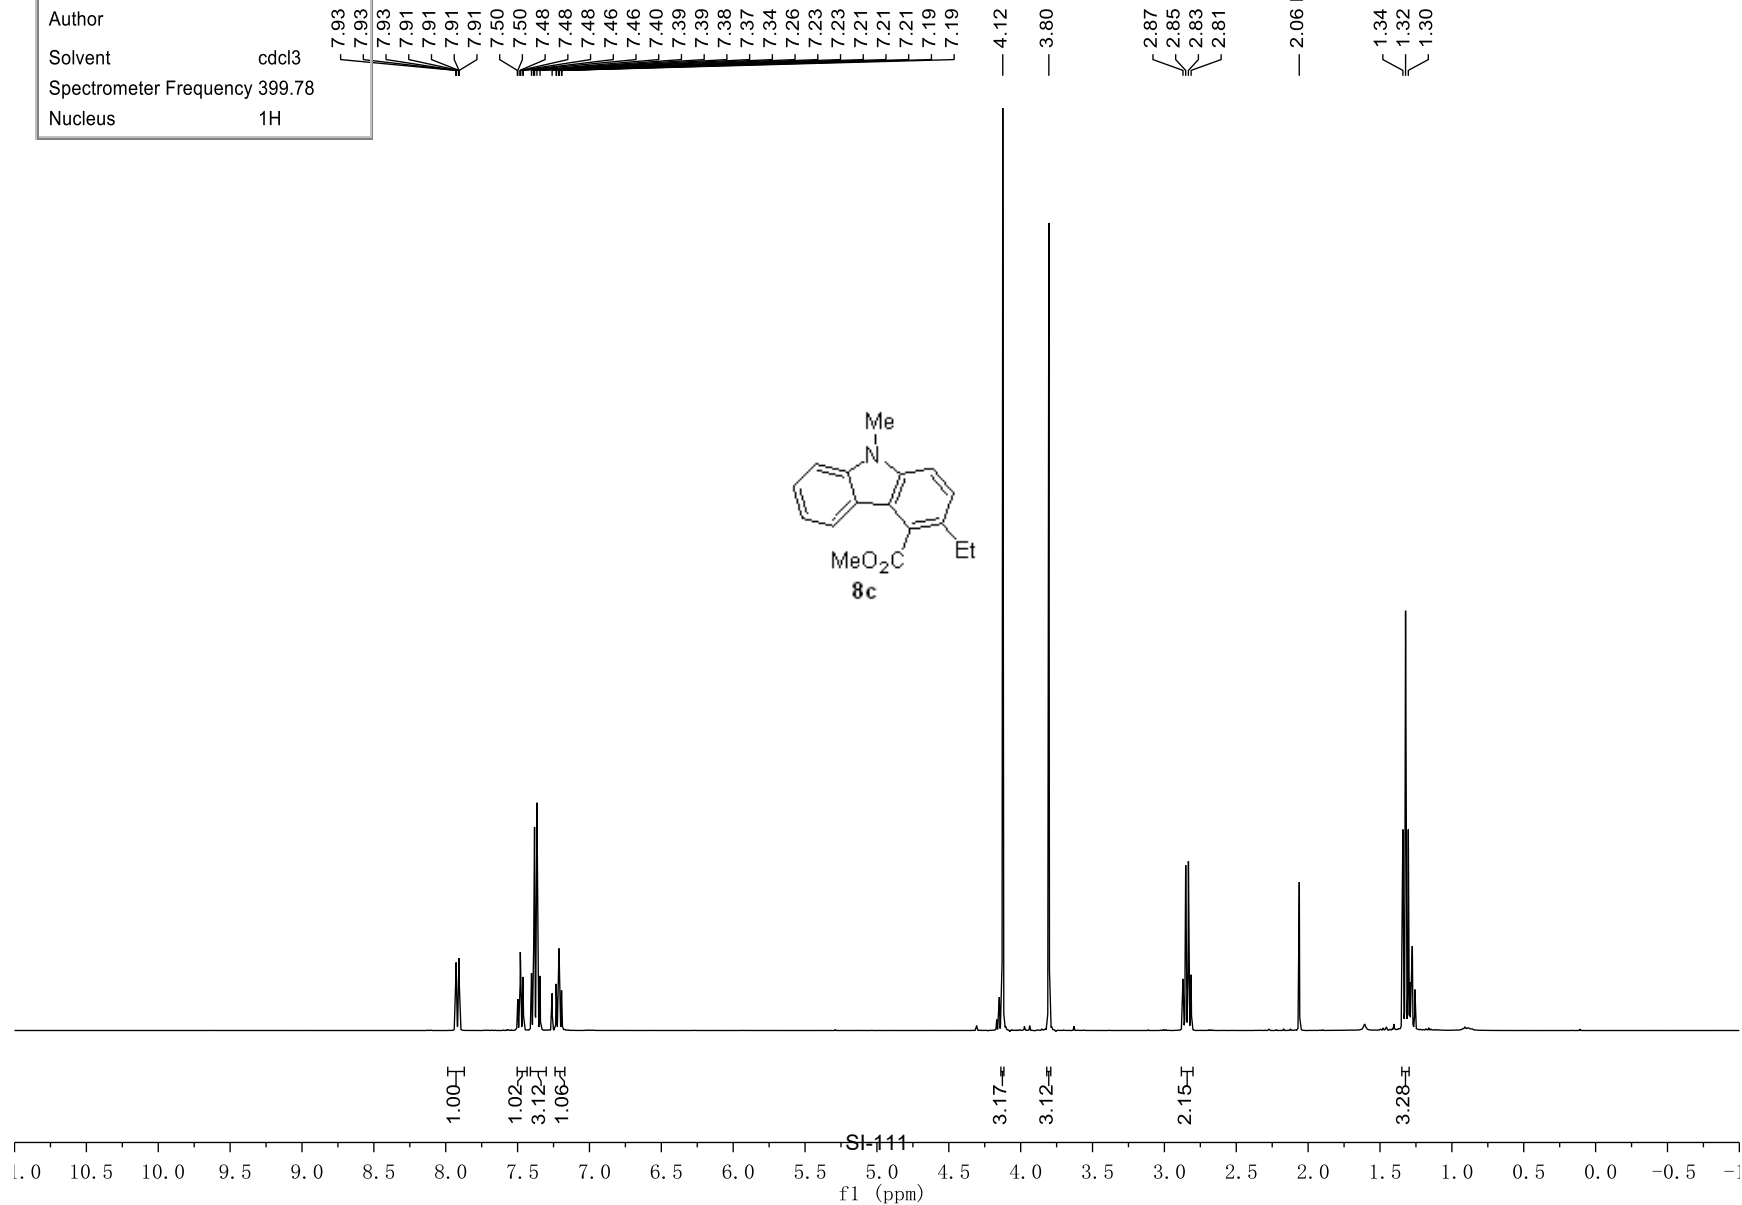

mx4c-189-8c

| Parameters             |             |
|------------------------|-------------|
| Parameter              | Value       |
| Title                  | mx4c-189-8c |
| Author                 | admin       |
| Solvent                | cdcl3       |
| Spectrometer Frequency | 150.79      |
| Nucleus                | 13C         |

170.64

141.55  
139.51  
132.27  
126.63  
126.12  
125.73  
121.64  
121.03  
119.21  
119.15  
110.24  
108.66

52.37

29.18  
26.75

16.84

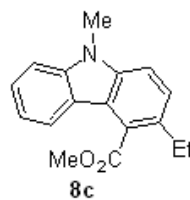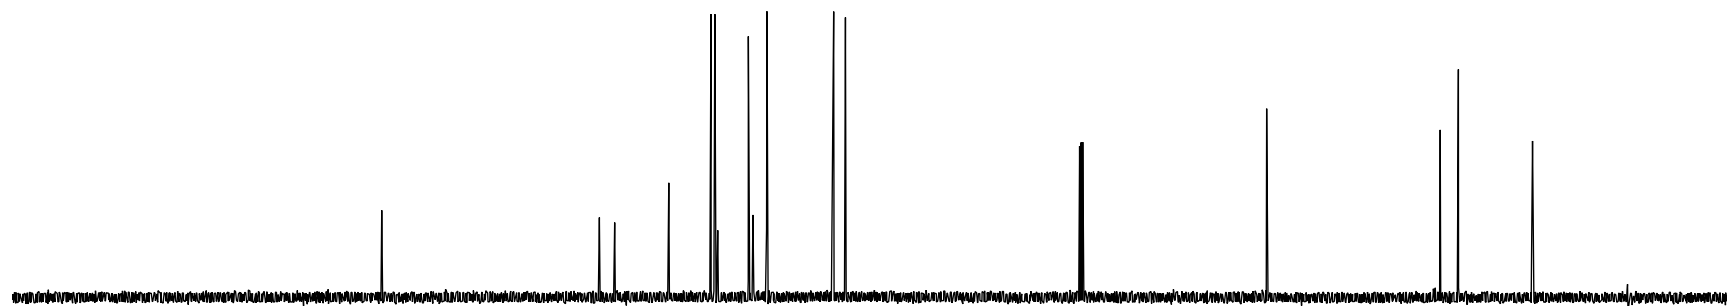

SI-112  
20 210 200 190 180 170 160 150 140 130 120 110 100 90 80 70 60 50 40 30 20 10 0 -  
f1 (ppm)



mx4h-222A-P

| Parameters             |             |
|------------------------|-------------|
| Parameter              | Value       |
| Title                  | mx4h-222A-P |
| Author                 | admin       |
| Solvent                | cdcl3       |
| Spectrometer Frequency | 599.64      |
| Nucleus                | 1H          |

7.90 7.89 7.49 7.49 7.48 7.48 7.47 7.47 7.43 7.42 7.40 7.38 7.26 7.22 7.21 7.19 7.19 5.29 4.11 3.95 3.94 3.93 3.83 3.08 3.07 3.06 1.59 1.14 1.13 1.13 1.12 1.11 1.11 1.10 1.09 1.09 1.07 1.06 1.06 1.05 1.04

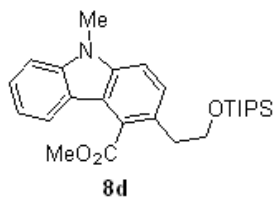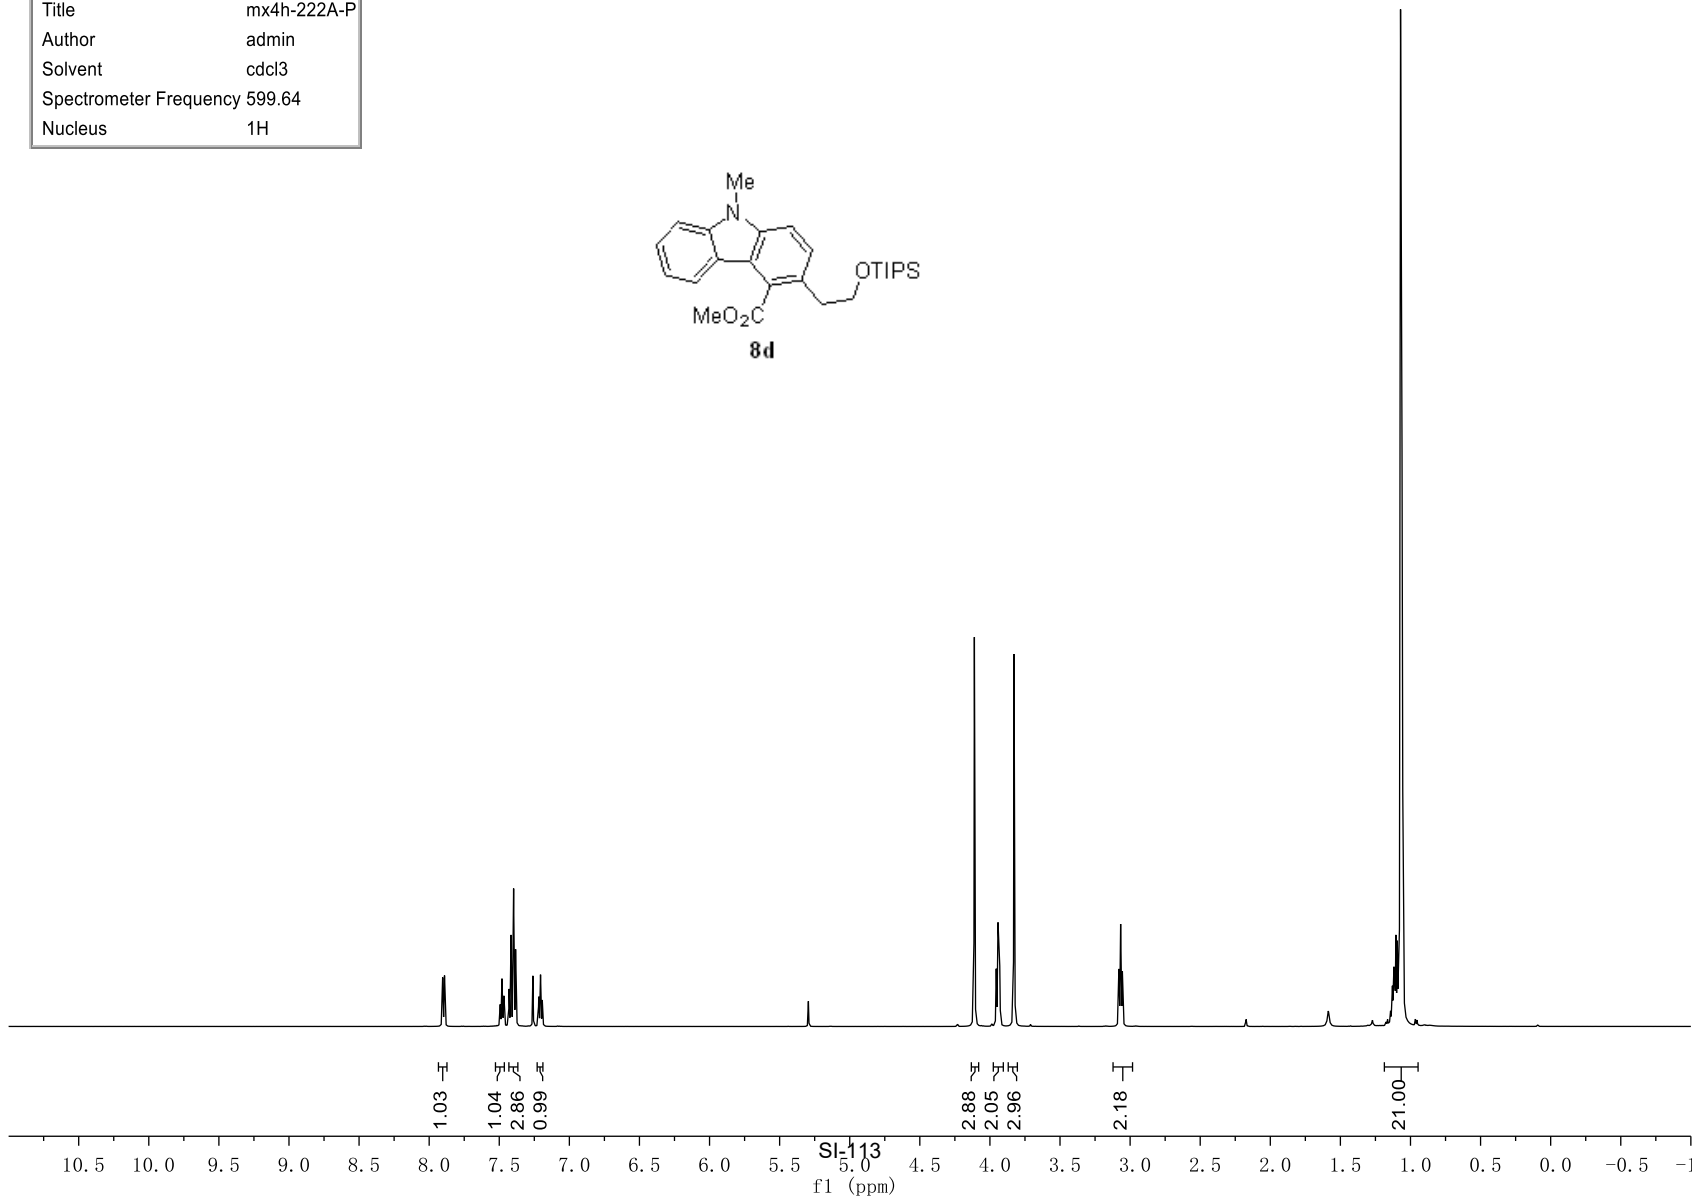

mx4c-222A-P

| Parameters             |             |
|------------------------|-------------|
| Parameter              | Value       |
| Title                  | mx4c-222A-P |
| Author                 | admin       |
| Solvent                | cdcl3       |
| Spectrometer Frequency | 150.79      |
| Nucleus                | 13C         |

170.44

141.52  
139.82  
128.30  
126.84  
126.57  
126.18  
121.66  
121.04  
119.28  
119.24  
109.96  
108.70

65.24

52.46

37.40

29.23

18.16

12.13

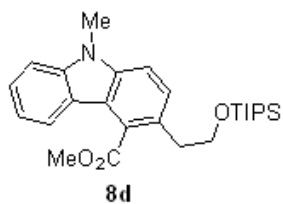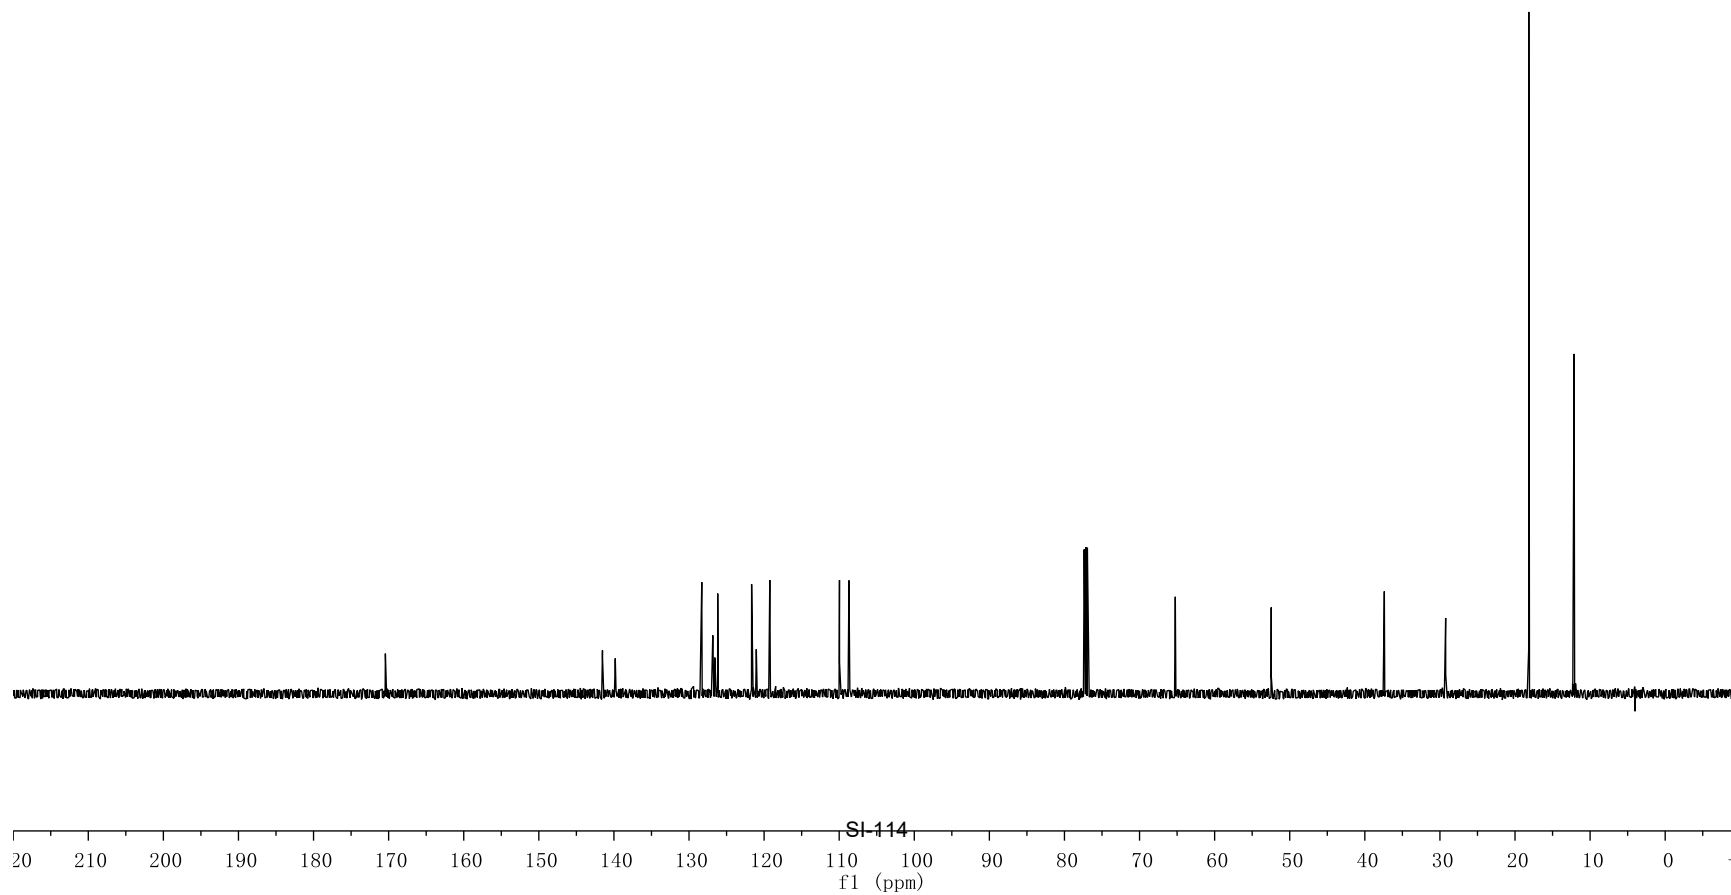

Supplement: NIHMS1051704-supplement-Supp_info.pdf [file NIHMS1051704-supplement-Supp_info.pdf]
